# Supplementary material for: Действительность документов об актах гражданского состояния на территории иностранных государств
Source: MDPI journal article supplement (doi:10.3390/cancers14071655), 2012-01-01
Supplement: s1 [file s1]

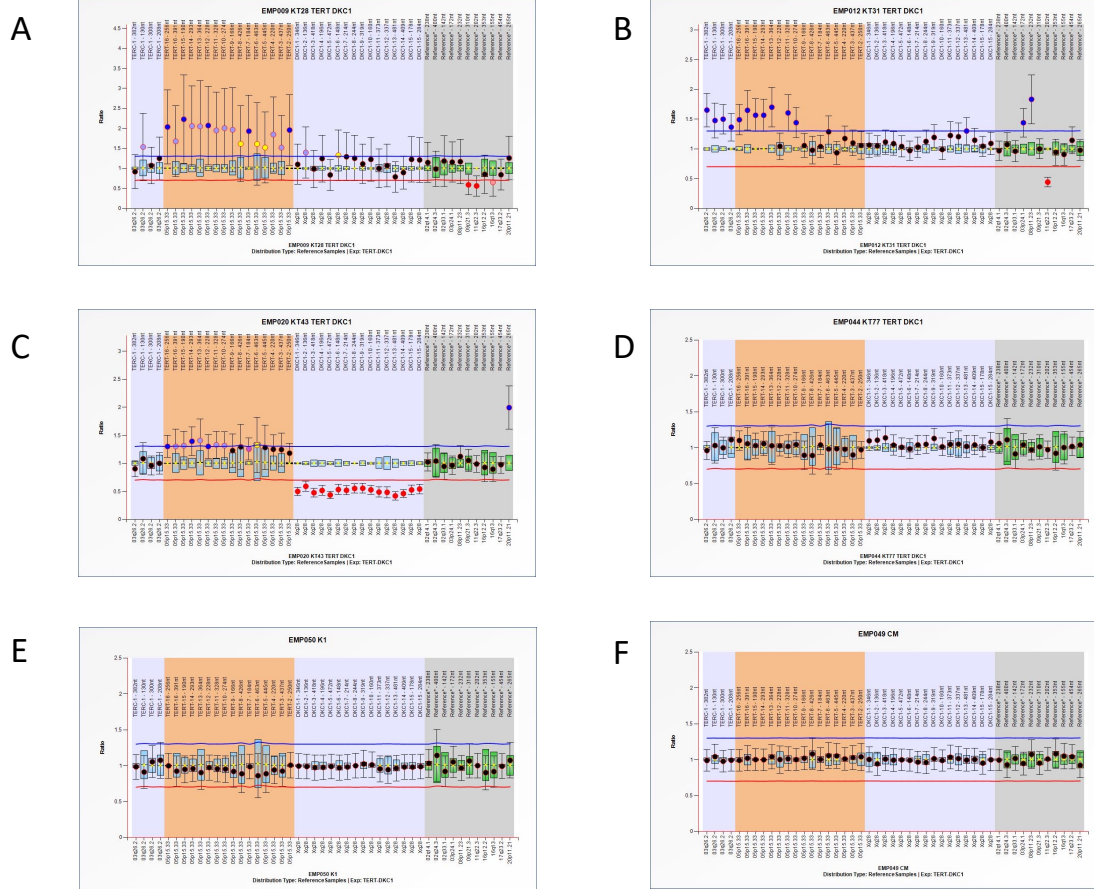

**Supplementary Figure S2. *TERT* Copy number gain in Wilms tumor patient-derived xenografts.** Multiplex-ligation probe amplification (MLPA) plots demonstrate copy number gain of *TERT* (5p15.33, salmon color) in Wilms tumor patient-derived xenografts (A) KT-28, (B) KT-31, and (C) KT-43. For contrast a diploid copy number profile is shown for (D) KT-77, (E) a normal kidney specimen, and (F) commercially-available control normal male DNA.

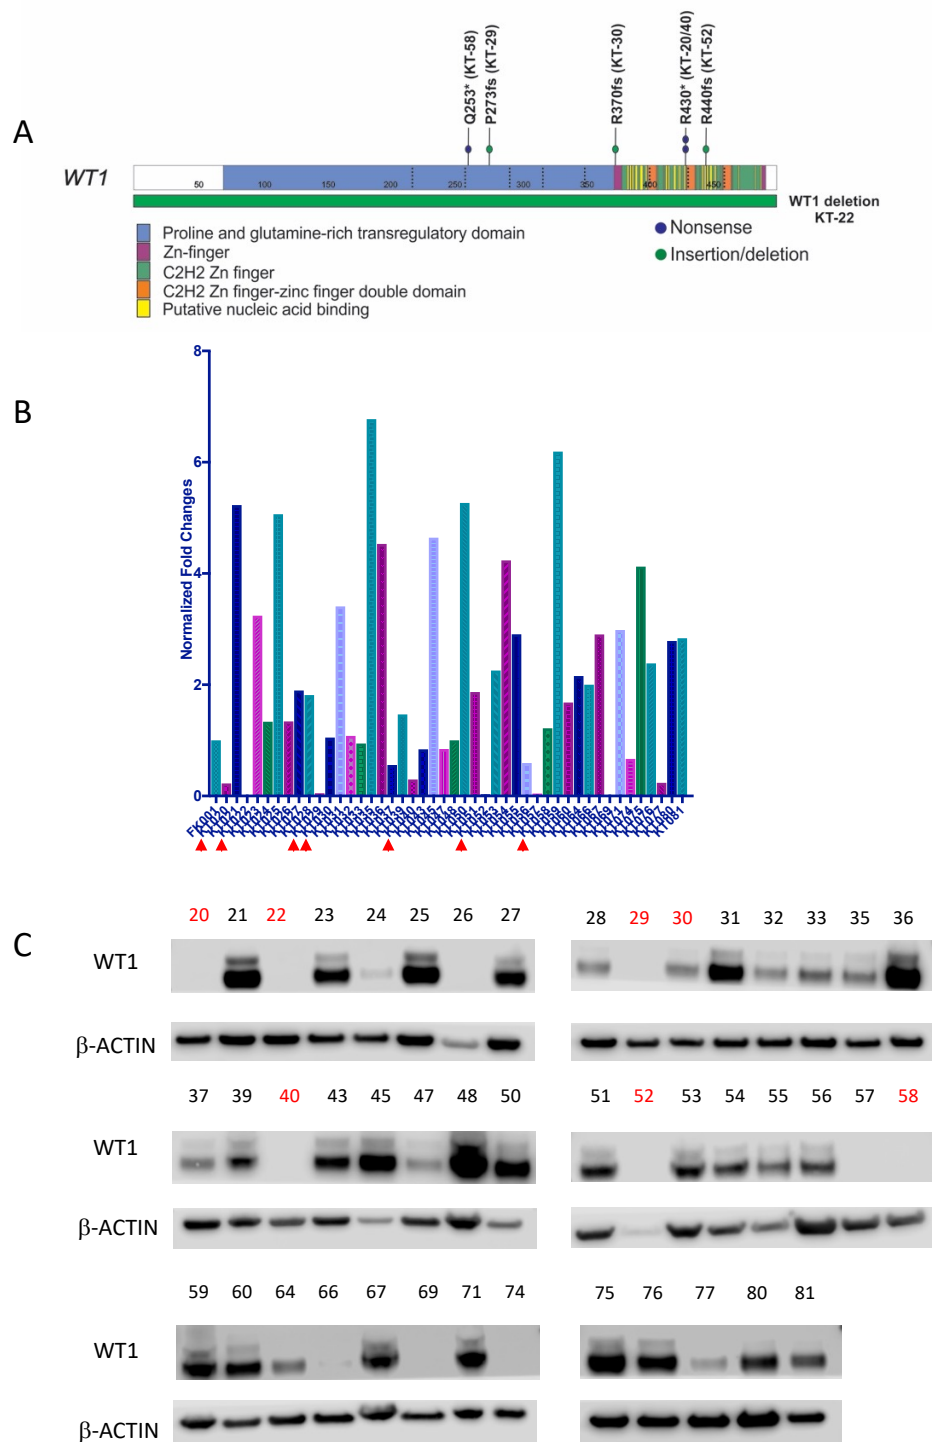

**Supplementary Figure S3. *WT1* mutations and expression of *WT1* in Wilms tumor patient-derived xenografts.** (A) Seven xenograft specimens (KT-20, 22, 29, 30, 40, 52, and 58) were found to have biallelic inactivating mutations in *WT1* by Sanger sequencing. (B) The relative gene expression of *WT1* as determined by qRT-PCR normalized to fetal kidney (FK001- first sample on x-axis) expression is shown. Red arrows indicate *WT1*-mutant specimens. (C) Protein expression of *WT1* is shown with xenografts shown in red font indicating specimens determined to have biallelic inactivating mutations in *WT1*.

## Xenografts – qRT-PCR data

## P-values

A

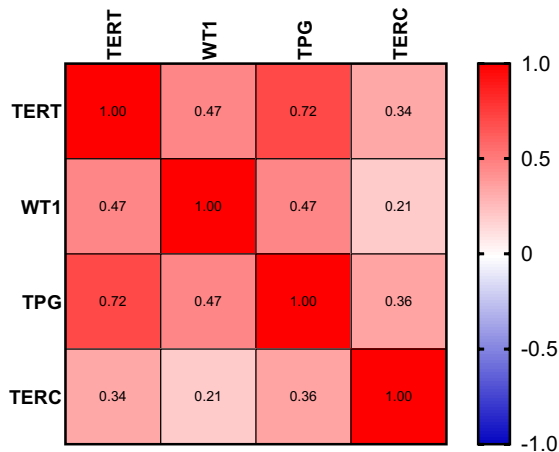

|      | TERT                 | WT1   | TPG                  | TERC  |
|------|----------------------|-------|----------------------|-------|
| TERT |                      | 0.001 | 3.3x10 <sup>-3</sup> | 0.023 |
| WT1  | 0.001                |       | 0.001                | 0.176 |
| TPG  | 3.3x10 <sup>-3</sup> | 0.001 |                      | 0.016 |
| TERC | 0.023                | 0.176 | 0.016                |       |

B

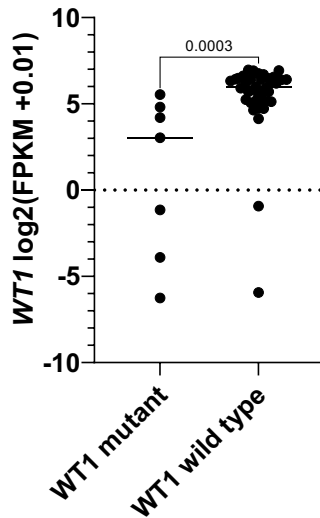

C

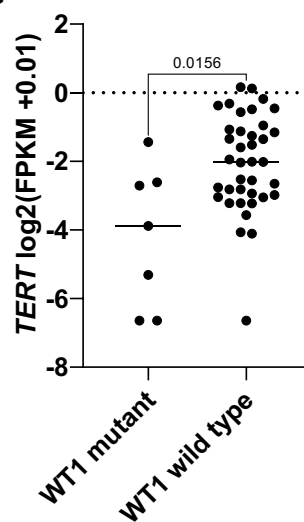

D

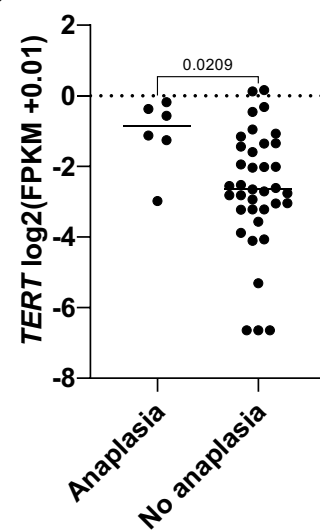

**Supplementary Figure S4.** (A) qRT-PCR demonstrates statistically significant positive correlations between *TERT* expression and telomerase activity (TPG) and *WT1* expression and telomerase activity (TPG). Correlations are Spearman  $r$  values with associated p-values in right panel. (B) The statistically significant reduction in *WT1* expression among xenograft samples with inactivating *WT1* mutations was confirmed by RNA-seq (Mann-Whitney p value = 0.0003). (C) Xenograft specimens with inactivating mutations in *WT1* were found to have lower *TERT* expression by RNA-seq ( $p=0.0156$ ). (D) Xenograft samples with diffuse anaplasia were found to have significantly higher expression of *TERT* than favorable histology xenografts by RNA-seq ( $p=0.0209$ ).

A

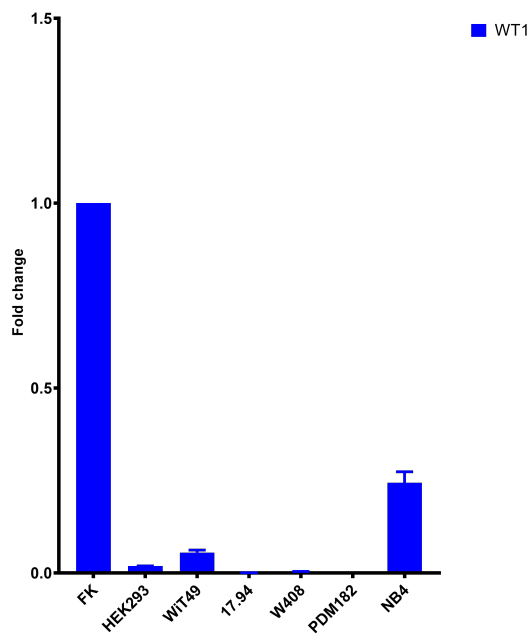

B

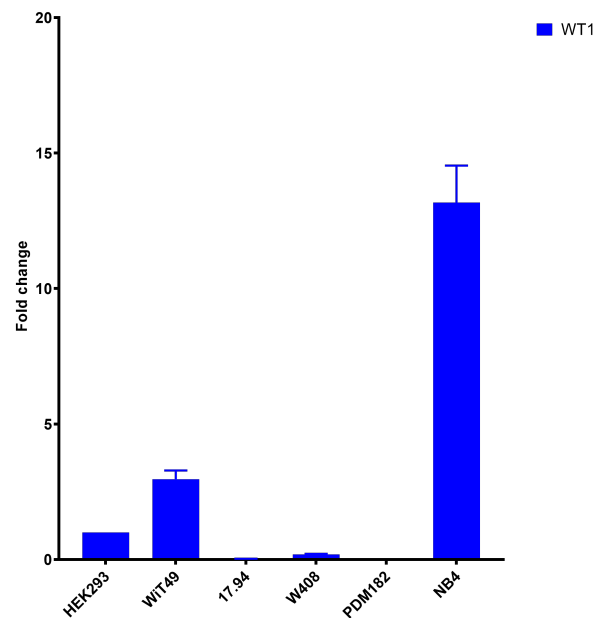

C

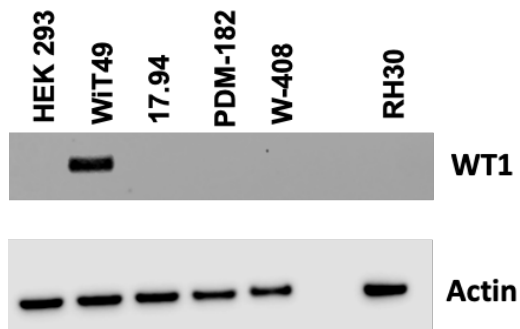

D

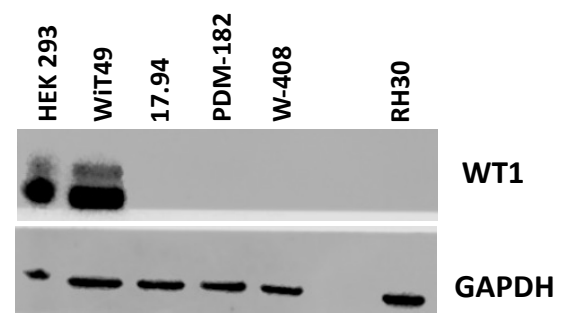

**Supplementary Figure S5. Expression of WT1 in *in vitro* cell lines.** (A) The relative gene expression of *WT1* determined by qRT-PCR and normalized to fetal kidney is shown. WT1 was detected in the transformed human embryonic kidney cell line HEK293, the anaplastic Wilms tumor cell line WiT49, and the human acute promyelocytic cell line NB4, but not the Wilms tumor cell lines 17.94, COGW408, or PDM182. (B) The relative expression of WT1 in these cell lines is shown using HEK293 as a reference. (C) Western blot demonstrates protein detection of WT1 in the WiT49 cell line. (D) In a different experiment and with longer exposure, western blot detection of WT1 is shown in HEK293 and WiT49 cells.

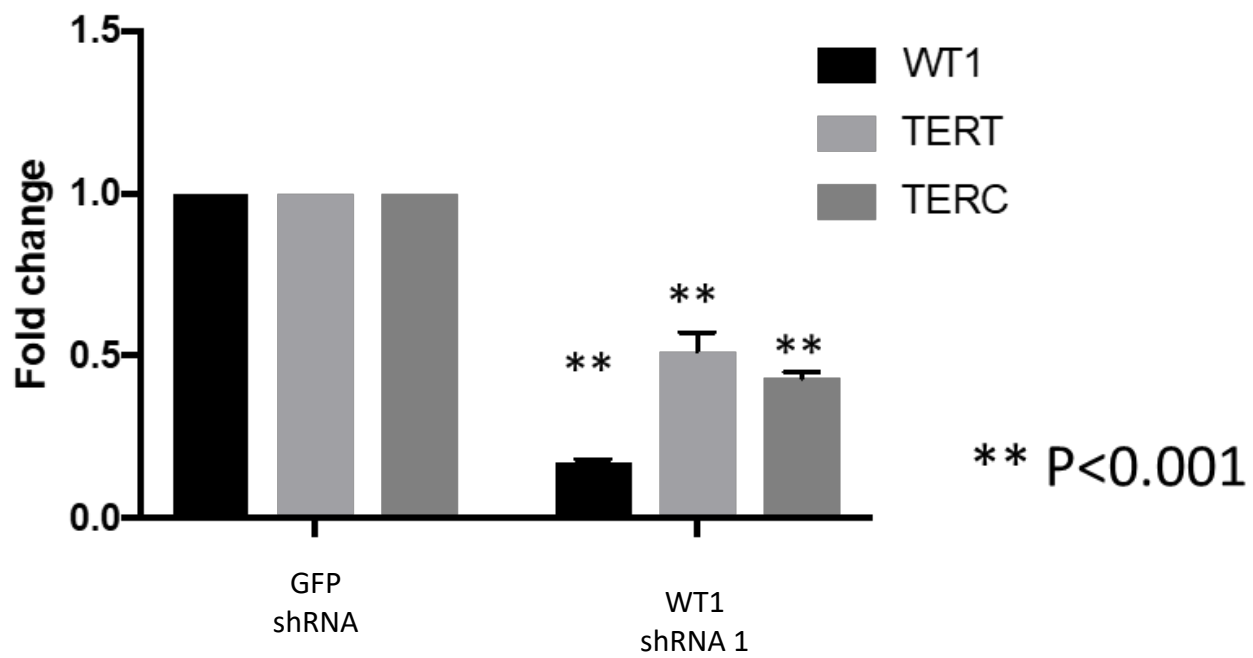

**Supplementary Figure S6. WT1 knockdown in the acute promyelocytic cell line NB4 is associated with reduction in *TERT* transcription by qRT-PCR.**
