# Supplementary material for: TERT Expression in Wilms Tumor Is Regulated by Promoter Mutation or Hypermethylation, WT1, and N-MYC
Source: Cancers (Basel). 2022 Mar 25;14(7):1655. doi: 10.3390/cancers14071655 (PMC8996936; doi:10.3390/cancers14071655)
Supplement: Supplementary file 1 [file cancers-14-01655-s001.zip]

Archive with 4 entries (4 files):
- Supplementary Data File S1.xlsx
- Supplementary Data File S2.xlsx
- Supplementary Data File S3.pdf
- TERT Supplementary Figures Revised 2-7-22.pdf
