# Supplementary material for: TERT Expression in Wilms Tumor Is Regulated by Promoter Mutation or Hypermethylation, WT1, and N-MYC
Source: Cancers (Basel). 2022 Mar 25;14(7):1655. doi: 10.3390/cancers14071655 (PMC8996936; doi:10.3390/cancers14071655)
Supplement: Supplementary file 1 [file cancers-14-01655-s001.zip › Supplementary Data File S1.xlsx]

## Sheet: TARGET_WT_MAF_TERT_1295000-1296
TARGET_CASE_ID	Trio	Hugo_Symbol	Variant_Classification	VariantType	dbSNP_RS	Mutation_Status	PFAM_DOMAIN	Somatic_Score	Somatic_Rank	Somatic_quality	Tumor_ReadCount_Alt	Tumor_ReadCount_Ref	Tumor_ReadCount_Total	Normal_ReadCount_Alt	Normal_ReadCount_Ref	Normal_ReadCount_Total	Cosmic	Cosmic_Gene	Reference_Allele	TumorSeq_Allele1	TumorSeq_Allele2	Match_Norm_Seq_Allele1	Match_Norm_Seq_Allele2	Tumor_Sample_Barcode	Match_Normal_Sample_Barcode	Entrez_Gene_Id	Chromosome	Start_position	End_position	miRNA	Verification_Status	Verification_Method	FET_Score	TumorRefCount_VS	TumorVarCount_VS	TumorTotalCount_VS	NormalRefCount_VS	NormalVarCount_VS	NormalTotalCount_VS
50-PAKNXS		TERT	SYNONYMOUS	SNP		Somatic		-32	0.005		1	7	8	0	5	5		Cosmic_Gene	G	G	A	G	G	TARGET-50-PAKNXS-01A-01D	TARGET-50-PAKNXS-10A-01D	7015	5	1295000	1295000				2
50-PAKZHF		TERT	FRAMESHIFT	Del		Somatic		-29	0.028		1	7	8	0	13	13		Cosmic_Gene	C	C		C	C	TARGET-50-PAKZHF-01A-01D	TARGET-50-PAKZHF-11A-01D	7015	5	1295001	1295001				4
50-PAKNXS		TERT	MISSENSE	SNP		Somatic		-33	0.004		1	7	8	0	5	5		Cosmic_Gene	C	C	A	C	C	TARGET-50-PAKNXS-01A-01D	TARGET-50-PAKNXS-10A-01D	7015	5	1295003	1295003				2
50-PAKMUB		TERT	MISSENSE	SNP		LOH					0	5	5	1	3	4		Cosmic_Gene	G	G	G	G	A	TARGET-50-PAKMUB-01A-02D	TARGET-50-PAKMUB-10A-01D	7015	5	1295101	1295101
50-PAJLUJ		TERT	UTR5	SNP		LOH					0	10	10	1	5	6		Cosmic_Gene	G	G	G	G	T	TARGET-50-PAJLUJ-01A-01D	TARGET-50-PAJLUJ-10A-01D	7015	5	1295140	1295140
50-PAJNJJ		TERT	TSS-UPSTREAM	SNP		Somatic		-17	0.031		7	4	11	0	11	11		Cosmic_Gene	G	G	A	G	G	TARGET-50-PAJNJJ-01A-01D	TARGET-50-PAJNJJ-11A-01D	7015	5	1295228	1295228				27
50-PAJNZK		TERT	TSS-UPSTREAM	SNP		Somatic		-2	0.112	SQHIGH	10	2	12	0	14	14		Cosmic_Gene	G	G	A	G	G	TARGET-50-PAJNZK-01A-01D	TARGET-50-PAJNZK-11A-01D	7015	5	1295228	1295228				49
50-PALEZT		TERT	TSS-UPSTREAM	SNP		Somatic		-3	0.11	SQHIGH	14	6	20	0	8	8		Cosmic_Gene	G	G	A	G	G	TARGET-50-PALEZT-01A-01D	TARGET-50-PALEZT-10A-01D	7015	5	1295228	1295228				30
50-CAAAAL		TERT	TSS-UPSTREAM	SNP	dbsnp.126:rs35265333	Germline					7	10	17	9	12	21		Cosmic_Gene	C	C	T	C	T	TARGET-50-CAAAAL-01A-01D	TARGET-50-CAAAAL-10A-01D	7015	5	1295340	1295340
50-PAJMRL		TERT	TSS-UPSTREAM	SNP		LOH					0	8	8	1	3	4		Cosmic_Gene	C	C	C	C	T	TARGET-50-PAJMRL-01A-01D	TARGET-50-PAJMRL-10A-01D	7015	5	1295341	1295341
50-CAAAAH		TERT	TSS-UPSTREAM	SNP	dbsnp.100:rs2853669	Germline					13	0	13	15	0	15		Cosmic_Gene	A	G	G	G	G	TARGET-50-CAAAAH-01A-01D	TARGET-50-CAAAAH-10A-01D	7015	5	1295349	1295349
50-CAAAAO		TERT	TSS-UPSTREAM	SNP	dbsnp.100:rs2853669	Germline					7	3	10	6	8	14		Cosmic_Gene	A	A	G	A	G	TARGET-50-CAAAAO-01A-01D	TARGET-50-CAAAAO-11A-01D	7015	5	1295349	1295349
50-CAAAAS		TERT	TSS-UPSTREAM	SNP	dbsnp.100:rs2853669	Germline					15	0	15	21	0	21		Cosmic_Gene	A	G	G	G	G	TARGET-50-CAAAAS-01A-01D	TARGET-50-CAAAAS-10A-01D	7015	5	1295349	1295349
50-PAECJB		TERT	TSS-UPSTREAM	SNP	dbsnp.100:rs2853669	Germline					7	7	14	5	8	13		Cosmic_Gene	A	A	G	A	G	TARGET-50-PAECJB-01A-01D	TARGET-50-PAECJB-11A-01D	7015	5	1295349	1295349
50-PAJLKR		TERT	TSS-UPSTREAM	SNP	dbsnp.100:rs2853669	Germline					2	7	9	12	9	21		Cosmic_Gene	A	A	G	A	G	TARGET-50-PAJLKR-01A-01D	TARGET-50-PAJLKR-11A-01D	7015	5	1295349	1295349
50-PAJLNJ		TERT	TSS-UPSTREAM	SNP	dbsnp.100:rs2853669	Germline					7	9	16	11	11	22		Cosmic_Gene	A	A	G	A	G	TARGET-50-PAJLNJ-01A-01D	TARGET-50-PAJLNJ-11A-01D	7015	5	1295349	1295349
50-PAJLTH		TERT	TSS-UPSTREAM	SNP	dbsnp.100:rs2853669	Germline					4	11	15	13	19	32		Cosmic_Gene	A	A	G	A	G	TARGET-50-PAJLTH-01A-01D	TARGET-50-PAJLTH-11A-01D	7015	5	1295349	1295349
50-PAJMEL		TERT	TSS-UPSTREAM	SNP	dbsnp.100:rs2853669	Germline					9	7	16	11	12	23		Cosmic_Gene	A	A	G	A	G	TARGET-50-PAJMEL-01A-01D	TARGET-50-PAJMEL-10A-01D	7015	5	1295349	1295349
50-PAJMJK		TERT	TSS-UPSTREAM	SNP	dbsnp.100:rs2853669	Germline					6	6	12	6	1	7		Cosmic_Gene	A	A	G	A	G	TARGET-50-PAJMJK-01A-01D	TARGET-50-PAJMJK-10A-01D	7015	5	1295349	1295349
50-PAJMKI		TERT	TSS-UPSTREAM	SNP	dbsnp.100:rs2853669	Germline					5	6	11	7	10	17		Cosmic_Gene	A	A	G	A	G	TARGET-50-PAJMKI-01A-01D	TARGET-50-PAJMKI-11A-01D	7015	5	1295349	1295349
50-PAJMLI		TERT	TSS-UPSTREAM	SNP	dbsnp.100:rs2853669	Germline					3	12	15	20	9	29		Cosmic_Gene	A	A	G	A	G	TARGET-50-PAJMLI-01A-01D	TARGET-50-PAJMLI-11A-01D	7015	5	1295349	1295349
50-PAJMMY		TERT	TSS-UPSTREAM	SNP	dbsnp.100:rs2853669	Germline					11	12	23	8	7	15		Cosmic_Gene	A	A	G	A	G	TARGET-50-PAJMMY-01A-01D	TARGET-50-PAJMMY-11A-01D	7015	5	1295349	1295349
50-PAJMUF		TERT	TSS-UPSTREAM	SNP	dbsnp.100:rs2853669	Germline					8	5	13	4	4	8		Cosmic_Gene	A	A	G	A	G	TARGET-50-PAJMUF-01A-01D	TARGET-50-PAJMUF-10A-01D	7015	5	1295349	1295349
50-PAJNCZ		TERT	TSS-UPSTREAM	SNP	dbsnp.100:rs2853669	Germline					8	5	13	9	9	18		Cosmic_Gene	A	A	G	A	G	TARGET-50-PAJNCZ-01A-01D	TARGET-50-PAJNCZ-11A-01D	7015	5	1295349	1295349
50-PAJNDU		TERT	TSS-UPSTREAM	SNP	dbsnp.100:rs2853669	Germline					7	10	17	13	9	22		Cosmic_Gene	A	A	G	A	G	TARGET-50-PAJNDU-01A-01D	TARGET-50-PAJNDU-11A-01D	7015	5	1295349	1295349
50-PAJNEC		TERT	TSS-UPSTREAM	SNP	dbsnp.100:rs2853669	Germline					5	6	11	4	14	18		Cosmic_Gene	A	A	G	A	G	TARGET-50-PAJNEC-01A-01D	TARGET-50-PAJNEC-11A-01D	7015	5	1295349	1295349
50-PAJNNC		TERT	TSS-UPSTREAM	SNP	dbsnp.100:rs2853669	Germline					14	12	26	11	6	17		Cosmic_Gene	A	A	G	A	G	TARGET-50-PAJNNC-01A-01D	TARGET-50-PAJNNC-11A-01D	7015	5	1295349	1295349
50-PAJNSL		TERT	TSS-UPSTREAM	SNP	dbsnp.100:rs2853669	Germline					13	8	21	15	11	26		Cosmic_Gene	A	A	G	A	G	TARGET-50-PAJNSL-01A-01D	TARGET-50-PAJNSL-11A-01D	7015	5	1295349	1295349
50-PAJNUS		TERT	TSS-UPSTREAM	SNP	dbsnp.100:rs2853669	Germline					8	9	17	6	10	16		Cosmic_Gene	A	A	G	A	G	TARGET-50-PAJNUS-01A-01D	TARGET-50-PAJNUS-10A-01D	7015	5	1295349	1295349
50-PAJNZI		TERT	TSS-UPSTREAM	SNP	dbsnp.100:rs2853669	Germline					8	2	10	6	4	10		Cosmic_Gene	A	A	G	A	G	TARGET-50-PAJNZI-01A-01D	TARGET-50-PAJNZI-11A-01D	7015	5	1295349	1295349
50-PAJNZS		TERT	TSS-UPSTREAM	SNP	dbsnp.100:rs2853669	Germline					14	6	20	4	7	11		Cosmic_Gene	A	A	G	A	G	TARGET-50-PAJNZS-01A-01D	TARGET-50-PAJNZS-11A-01D	7015	5	1295349	1295349
50-PAJPEW		TERT	TSS-UPSTREAM	SNP	dbsnp.100:rs2853669	Germline					7	11	18	15	16	31		Cosmic_Gene	A	A	G	A	G	TARGET-50-PAJPEW-01A-01D	TARGET-50-PAJPEW-11A-01D	7015	5	1295349	1295349
50-PAJPHA		TERT	TSS-UPSTREAM	SNP	dbsnp.100:rs2853669	Germline					7	13	20	7	11	18		Cosmic_Gene	A	A	G	A	G	TARGET-50-PAJPHA-01A-01D	TARGET-50-PAJPHA-11A-01D	7015	5	1295349	1295349
50-PAKGED		TERT	TSS-UPSTREAM	SNP	dbsnp.100:rs2853669	Germline					14	15	29	11	11	22		Cosmic_Gene	A	A	G	A	G	TARGET-50-PAKGED-01A-01D	TARGET-50-PAKGED-10A-01D	7015	5	1295349	1295349
50-PAKKSE		TERT	TSS-UPSTREAM	SNP	dbsnp.100:rs2853669	Germline					21	0	21	16	0	16		Cosmic_Gene	A	G	G	G	G	TARGET-50-PAKKSE-01A-01D	TARGET-50-PAKKSE-11A-01D	7015	5	1295349	1295349
50-PAKNAL		TERT	TSS-UPSTREAM	SNP	dbsnp.100:rs2853669	Germline					18	0	18	28	0	28		Cosmic_Gene	A	G	G	G	G	TARGET-50-PAKNAL-01A-01D	TARGET-50-PAKNAL-10A-01D	7015	5	1295349	1295349
50-PAKNXS		TERT	TSS-UPSTREAM	SNP	dbsnp.100:rs2853669	Germline					4	6	10	5	7	12		Cosmic_Gene	A	A	G	A	G	TARGET-50-PAKNXS-01A-01D	TARGET-50-PAKNXS-10A-01D	7015	5	1295349	1295349
50-PAKRVH		TERT	TSS-UPSTREAM	SNP	dbsnp.100:rs2853669	Germline					15	0	15	9	0	9		Cosmic_Gene	A	G	G	G	G	TARGET-50-PAKRVH-01A-01D	TARGET-50-PAKRVH-10A-01D	7015	5	1295349	1295349
50-PAKRZW		TERT	TSS-UPSTREAM	SNP	dbsnp.100:rs2853669	Germline					15	3	18	7	14	21		Cosmic_Gene	A	A	G	A	G	TARGET-50-PAKRZW-01A-01D	TARGET-50-PAKRZW-11A-01D	7015	5	1295349	1295349
50-PAKUIT		TERT	TSS-UPSTREAM	SNP	dbsnp.100:rs2853669	Germline					12	8	20	11	8	19		Cosmic_Gene	A	A	G	A	G	TARGET-50-PAKUIT-01A-01D	TARGET-50-PAKUIT-10A-01D	7015	5	1295349	1295349
50-PAKYFC		TERT	TSS-UPSTREAM	SNP	dbsnp.100:rs2853669	Germline					9	3	12	6	15	21		Cosmic_Gene	A	A	G	A	G	TARGET-50-PAKYFC-01A-01D	TARGET-50-PAKYFC-11A-01D	7015	5	1295349	1295349
50-PAJLNJ		TERT	TSS-UPSTREAM	SNP	dbsnp.126:rs35226131	Germline					9	7	16	16	11	27		Cosmic_Gene	C	C	T	C	T	TARGET-50-PAJLNJ-01A-01D	TARGET-50-PAJLNJ-11A-01D	7015	5	1295373	1295373
50-PAJNAA		TERT	TSS-UPSTREAM	SNP	dbsnp.126:rs35226131	Germline					11	8	19	8	8	16		Cosmic_Gene	C	C	T	C	T	TARGET-50-PAJNAA-01A-01D	TARGET-50-PAJNAA-10A-01D	7015	5	1295373	1295373
50-PAKRZW		TERT	TSS-UPSTREAM	SNP	dbsnp.126:rs35226131	Germline					4	11	15	11	8	19		Cosmic_Gene	C	C	T	C	T	TARGET-50-PAKRZW-01A-01D	TARGET-50-PAKRZW-11A-01D	7015	5	1295373	1295373
50-PALERC		TERT	TSS-UPSTREAM	SNP	dbsnp.126:rs35226131	Germline					8	6	14	9	12	21		Cosmic_Gene	C	C	T	C	T	TARGET-50-PALERC-01A-01D	TARGET-50-PALERC-11A-01D	7015	5	1295373	1295373
50-PAKZER		TERT	TSS-UPSTREAM	SNP		LOH					0	16	16	2	12	14		Cosmic_Gene	G	G	G	G	A	TARGET-50-PAKZER-01A-01D	TARGET-50-PAKZER-10A-01D	7015	5	1295390	1295390
50-PAJNAA		TERT	TSS-UPSTREAM	SNP	dbsnp.126:rs35161420	Germline					6	7	13	5	8	13		Cosmic_Gene	C	C	G	C	G	TARGET-50-PAJNAA-01A-01D	TARGET-50-PAJNAA-10A-01D	7015	5	1295452	1295452
50-PAKRZW		TERT	TSS-UPSTREAM	SNP	dbsnp.126:rs35161420	Germline					6	16	22	7	5	12		Cosmic_Gene	C	C	G	C	G	TARGET-50-PAKRZW-01A-01D	TARGET-50-PAKRZW-11A-01D	7015	5	1295452	1295452
50-PALERC		TERT	TSS-UPSTREAM	SNP	dbsnp.126:rs35161420	Germline					5	9	14	12	15	27		Cosmic_Gene	C	C	G	C	G	TARGET-50-PALERC-01A-01D	TARGET-50-PALERC-11A-01D	7015	5	1295452	1295452
50-PAJLLF		TERT	TSS-UPSTREAM	SNP		Somatic		-18	0.03		1	5	6	0	20	20		Cosmic_Gene	G	G	A	G	G	TARGET-50-PAJLLF-01A-01D	TARGET-50-PAJLLF-11A-01D	7015	5	1295455	1295455				6
50-PAJNCJ		TERT	TSS-UPSTREAM	Del		Germline					7	6	13	7	6	13		Cosmic_Gene	CG	CG		CG		TARGET-50-PAJNCJ-01A-01D	TARGET-50-PAJNCJ-11A-01D	7015	5	1295458	1295459
50-PAJNCZ		TERT	TSS-UPSTREAM	SNP		LOH					1	7	8	3	16	19		Cosmic_Gene	G	G	G	G	C	TARGET-50-PAJNCZ-01A-01D	TARGET-50-PAJNCZ-11A-01D	7015	5	1295459	1295459
50-PAJLNJ		TERT	TSS-UPSTREAM	SNP		LOH					0	13	13	2	10	12		Cosmic_Gene	C	C	C	C	G	TARGET-50-PAJLNJ-01A-01D	TARGET-50-PAJLNJ-11A-01D	7015	5	1295464	1295464
50-PAJNJJ		TERT	TSS-UPSTREAM	SNP		LOH					0	20	20	2	15	17		Cosmic_Gene	G	G	G	G	A	TARGET-50-PAJNJJ-01A-01D	TARGET-50-PAJNJJ-11A-01D	7015	5	1295479	1295479
50-PAJMRL		TERT	TSS-UPSTREAM	SNP		Somatic		-11	0.064		7	12	19	3	22	25		Cosmic_Gene	C	C	G	C	C	TARGET-50-PAJMRL-01A-01D	TARGET-50-PAJMRL-10A-01D	7015	5	1295505	1295505				12
50-PAJMRL		TERT	TSS-UPSTREAM	SNP		Somatic		-13	0.054		7	11	18	3	27	30		Cosmic_Gene	C	C	A	C	C	TARGET-50-PAJMRL-01A-01D	TARGET-50-PAJMRL-10A-01D	7015	5	1295508	1295508				16
50-PAKRVH		TERT	TSS-UPSTREAM	Sub		Somatic		-28	0.08		3	38	41	1	19	20		Cosmic_Gene	CG	CG	AA	CG	CG	TARGET-50-PAKRVH-01A-01D	TARGET-50-PAKRVH-10A-01D	7015	5	1295508	1295509				2
50-PAJNRL		TERT	TSS-UPSTREAM	SNP		Germline					16	23	39	8	8	16		Cosmic_Gene	A	A	T	A	T	TARGET-50-PAJNRL-01A-01D	TARGET-50-PAJNRL-11A-01D	7015	5	1295623	1295623
50-PAJMJK		TERT	TSS-UPSTREAM	SNP		LOH					0	22	22	4	14	18		Cosmic_Gene	C	C	C	C	G	TARGET-50-PAJMJK-01A-01D	TARGET-50-PAJMJK-10A-01D	7015	5	1295655	1295655
50-PAJLNJ		TERT	TSS-UPSTREAM	SNP	dbsnp.126:rs33958877	Germline					7	17	24	17	23	40		Cosmic_Gene	G	G	T	G	T	TARGET-50-PAJLNJ-01A-01D	TARGET-50-PAJLNJ-11A-01D	7015	5	1295682	1295682
50-PAJLTI		TERT	TSS-UPSTREAM	SNP	dbsnp.126:rs33958877	Germline					17	7	24	24	16	40		Cosmic_Gene	G	G	T	G	T	TARGET-50-PAJLTI-01A-01D	TARGET-50-PAJLTI-11A-01D	7015	5	1295682	1295682
50-PAJNAA		TERT	TSS-UPSTREAM	SNP	dbsnp.126:rs33958877	Germline					11	21	32	16	19	35		Cosmic_Gene	G	G	T	G	T	TARGET-50-PAJNAA-01A-01D	TARGET-50-PAJNAA-10A-01D	7015	5	1295682	1295682
50-PAJNAV		TERT	TSS-UPSTREAM	SNP	dbsnp.126:rs33958877	Germline					16	16	32	14	17	31		Cosmic_Gene	G	G	T	G	T	TARGET-50-PAJNAV-01A-01D	TARGET-50-PAJNAV-11A-01D	7015	5	1295682	1295682
50-PAKMUB		TERT	TSS-UPSTREAM	SNP	dbsnp.126:rs33958877	Germline					14	15	29	24	16	40		Cosmic_Gene	G	G	T	G	T	TARGET-50-PAKMUB-01A-02D	TARGET-50-PAKMUB-10A-01D	7015	5	1295682	1295682
50-PAKRZW		TERT	TSS-UPSTREAM	SNP	dbsnp.126:rs33958877	Germline					19	13	32	16	17	33		Cosmic_Gene	G	G	T	G	T	TARGET-50-PAKRZW-01A-01D	TARGET-50-PAKRZW-11A-01D	7015	5	1295682	1295682
50-PALERC		TERT	TSS-UPSTREAM	SNP	dbsnp.126:rs33958877	Germline					22	13	35	24	21	45		Cosmic_Gene	G	G	T	G	T	TARGET-50-PALERC-01A-01D	TARGET-50-PALERC-11A-01D	7015	5	1295682	1295682
50-PAJMRL		TERT	TSS-UPSTREAM	SNP		LOH					0	11	11	2	9	11		Cosmic_Gene	G	G	G	G	C	TARGET-50-PAJMRL-01A-01D	TARGET-50-PAJMRL-10A-01D	7015	5	1295708	1295708
50-PAJLSP		TERT	TSS-UPSTREAM	SNP	dbsnp.126:rs34768248	Germline					13	14	27	24	13	37		Cosmic_Gene	G	G	A	G	A	TARGET-50-PAJLSP-01A-01D	TARGET-50-PAJLSP-11A-01D	7015	5	1295716	1295716
50-PAJMJK		TERT	TSS-UPSTREAM	SNP	dbsnp.126:rs34768248	Germline					11	8	19	12	12	24		Cosmic_Gene	G	G	A	G	A	TARGET-50-PAJMJK-01A-01D	TARGET-50-PAJMJK-10A-01D	7015	5	1295716	1295716
50-PAJMKJ		TERT	TSS-UPSTREAM	SNP	dbsnp.126:rs34768248	Germline					11	16	27	19	16	35		Cosmic_Gene	G	G	A	G	A	TARGET-50-PAJMKJ-01A-01D	TARGET-50-PAJMKJ-11A-01D	7015	5	1295716	1295716
50-PAJNCJ		TERT	TSS-UPSTREAM	SNP	dbsnp.126:rs34768248	Germline					18	20	38	16	9	25		Cosmic_Gene	G	G	A	G	A	TARGET-50-PAJNCJ-01A-01D	TARGET-50-PAJNCJ-11A-01D	7015	5	1295716	1295716
50-PAKYFC		TERT	TSS-UPSTREAM	SNP	dbsnp.126:rs34768248	Germline					20	15	35	17	15	32		Cosmic_Gene	G	G	A	G	A	TARGET-50-PAKYFC-01A-01D	TARGET-50-PAKYFC-11A-01D	7015	5	1295716	1295716
50-PAJLSP		TERT	TSS-UPSTREAM	SNP	dbsnp.126:rs34685900	Germline					23	19	42	26	33	59		Cosmic_Gene	T	T	C	T	C	TARGET-50-PAJLSP-01A-01D	TARGET-50-PAJLSP-11A-01D	7015	5	1295803	1295803
50-PAJMJK		TERT	TSS-UPSTREAM	SNP	dbsnp.126:rs34685900	Germline					14	15	29	14	18	32		Cosmic_Gene	T	T	C	T	C	TARGET-50-PAJMJK-01A-01D	TARGET-50-PAJMJK-10A-01D	7015	5	1295803	1295803
50-PAJMKJ		TERT	TSS-UPSTREAM	SNP	dbsnp.126:rs34685900	Germline					25	26	51	23	23	46		Cosmic_Gene	T	T	C	T	C	TARGET-50-PAJMKJ-01A-01D	TARGET-50-PAJMKJ-11A-01D	7015	5	1295803	1295803
50-PAJNCJ		TERT	TSS-UPSTREAM	SNP	dbsnp.126:rs34685900	Germline					25	19	44	19	28	47		Cosmic_Gene	T	T	C	T	C	TARGET-50-PAJNCJ-01A-01D	TARGET-50-PAJNCJ-11A-01D	7015	5	1295803	1295803
50-PAKYFC		TERT	TSS-UPSTREAM	SNP	dbsnp.126:rs34685900	Germline					27	23	50	40	25	65		Cosmic_Gene	T	T	C	T	C	TARGET-50-PAKYFC-01A-01D	TARGET-50-PAKYFC-11A-01D	7015	5	1295803	1295803
50-PALDWP		TERT	TSS-UPSTREAM	SNP	dbsnp.126:rs34685900	Germline					17	24	41	23	22	45		Cosmic_Gene	T	T	C	T	C	TARGET-50-PALDWP-01A-01D	TARGET-50-PALDWP-11A-01D	7015	5	1295803	1295803
50-PAJLPX		TERT	TSS-UPSTREAM	Del		Germline					21	41	62	30	25	55		Cosmic_Gene	GGC	GGC		GGC		TARGET-50-PAJLPX-01A-01D	TARGET-50-PAJLPX-11A-01D	7015	5	1295849	1295851
50-PALKRS		TERT	TSS-UPSTREAM	Del		Somatic		-31	0.011		3	13	16	0	19	19		Cosmic_Gene	G	G		G	G	TARGET-50-PALKRS-01A-01D	TARGET-50-PALKRS-10A-01D	7015	5	1295905	1295905				11
50-PAJNCZ		TERT	TSS-UPSTREAM	SNP		Somatic		-31	0.006		6	17	23	1	24	25		Cosmic_Gene	G	G	C	G	G	TARGET-50-PAJNCZ-01A-01D	TARGET-50-PAJNCZ-11A-01D	7015	5	1295961	1295961				14
50-PAKRVH		TERT	TSS-UPSTREAM	SNP		LOH					1	37	38	4	28	32		Cosmic_Gene	T	T	T	T	C	TARGET-50-PAKRVH-01A-01D	TARGET-50-PAKRVH-10A-01D	7015	5	1295973	1295973
50-PAKZHF		TERT	TSS-UPSTREAM	SNP		Somatic		-32	0.004		6	35	41	0	35	35		Cosmic_Gene	T	T	C	T	T	TARGET-50-PAKZHF-01A-01D	TARGET-50-PAKZHF-11A-01D	7015	5	1295973	1295973				17

## Sheet: TARGET_TERT FPKM values
Chr	chr11	chr12	chr2	chr1	chr5	chr17	Chr
Start	532242	25357723	16080686	115247090	1253262	7565097	Start
End	537287	25403870	16087129	115259515	1295184	7590856	End
Sample	HRAS	KRAS	MYCN	NRAS	TERT	TP53	Sample	USI
SJWLM019985_D1	8.5188	16.1649	31.0085	17.4292	1.1707	49.177	SJWLM019985	CAAAAQ
SJWLM019993_D1	12.1624	6.4599	21.8475	14.846	0.8175	31.5229	SJWLM019993	PAJMEN
SJWLM019949_D1	8.438	13.2465	47.4503	27.1354	0.8041	44.1538	SJWLM019949	PAJNZK
SJWLM019907_D1	17.6618	13.6631	12.3048	2.3278	0.7741	1.8354	SJWLM019907	PAKYLT
SJWLM019938_D1	6.8444	22.4747	31.958	40.9304	0.7419	6.5687	SJWLM019938	PAJNVE
SJWLM019961_D1	6.6131	20.1597	117.496	14.6499	0.7364	60.7895	SJWLM019961	PAJPDC
SJWLM019928_D1	13.3292	8.4782	74.781	24.8649	0.7327	44.1999	SJWLM019928	PADZUB
SJWLM019960_D1	4.4207	9.4659	63.4504	39.2626	0.6866	49.2002	SJWLM019960	PAJNNC
SJWLM040007_D1	4.1419	10.8464	31.1204	23.7316	0.6314	11.4274	SJWLM040007	PAJMVC
SJWLM019997_D1	11.2181	16.0634	24.8368	34.327	0.6279	7.7672	SJWLM019997	PAJPCM
SJWLM019916_D1	6.547	9.2791	23.2083	32.8193	0.6246	50.7083	SJWLM019916	PAJNCJ
SJWLM019885_D1	11.9354	13.9504	11.9212	22.7853	0.5992	43.578	SJWLM019885	PAJNJJ
SJWLM019959_D1	9.0454	7.6297	33.4693	21.3609	0.5914	40.6651	SJWLM019959	PAJMXF
SJWLM019914_D1	17.9888	14.3339	84.2639	43.1225	0.4848	30.7557	SJWLM019914	PAJPAR
SJWLM019945_D1	11.0623	16.4393	38.4469	31.3055	0.4223	34.198	SJWLM019945	CAAAAC
SJWLM019998_D1	11.9739	6.0115	24.3631	17.613	0.3894	33.4754	SJWLM019998	PALFRD
SJWLM019918_D1	7.7215	11.5029	64.6702	26.5161	0.3721	53.5185	SJWLM019918	CAAAAR
SJWLM019990_D1	12.4243	9.6056	35.8532	19.0588	0.3632	28.8878	SJWLM019990	PAJPAU
SJWLM019957_D1	11.7372	11.1182	69.9687	18.8432	0.3492	33.7464	SJWLM019957	PALGLU
SJWLM019923_D1	8.2029	5.8362	54.1562	25.1337	0.339	32.2985	SJWLM019923	PAKZHF
SJWLM040005_D1	12.5109	11.5995	121.936	22.3563	0.3319	48.8659	SJWLM040005	PAKNTW
SJWLM019975_D1	18.1186	8.3703	26.0909	20.2126	0.2926	62.7155	SJWLM019975	PAJNRH
SJWLM019953_D1	10.0511	11.3667	82.4716	29.086	0.2884	55.5883	SJWLM019953	PAKSDG
SJWLM019947_D1	17.4246	17.0287	85.9966	29.002	0.2764	14.9793	SJWLM019947	PAKNXS
SJWLM019910_D1	9.5769	15.1979	55.8823	30.5161	0.2692	31.564	SJWLM019910	PAJMEP
SJWLM019984_D1	17.222	8.7008	27.0142	22.6127	0.264	40.1592	SJWLM019984	PALEZT
SJWLM019924_D1	14.9094	8.0882	67.6579	20.5076	0.2596	43.5404	SJWLM019924	PAJLNJ
SJWLM019911_R1	27.7482	9.7611	19.9365	18.0484	0.2581	60.6602	SJWLM019911	PAJNTJ
SJWLM019906_D1	6.1026	9.6174	51.4882	37.5922	0.2537	31.6471	SJWLM019906	PALJIP
SJWLM019963_D1	4.6735	17.1893	138.264	33.2097	0.2456	8.7912	SJWLM019963	CAAAAH
SJWLM019893_D1	12.4174	16.136	51.6919	29.2831	0.2434	5.2252	SJWLM019893	PAKRCC
SJWLM019906_R1	6.3101	8.7381	39.7495	32.0532	0.2301	26.1421	SJWLM019906	PALJIP
SJWLM019904_D1	12.0833	9.5461	36.6793	25.1007	0.2294	43.604	SJWLM019904	CAAAAJ
SJWLM019900_D1	4.2462	12.5417	48.3246	21.8416	0.2281	58.6059	SJWLM019900	PAJLSP
SJWLM019903_D1	7.1652	10.6977	43.0741	12.4647	0.2273	43.9411	SJWLM019903	PAJMKJ
SJWLM019970_D1	9.2633	10.7778	39.7595	31.7704	0.2158	35.2381	SJWLM019970	PALGAZ
SJWLM019948_D1	9.1265	13.3122	17.1666	44.627	0.2158	27.8781	SJWLM019948	PAJNLT
SJWLM019978_D1	11.6696	13.5213	50.3848	21.0031	0.213	49.804	SJWLM019978	PAJNRL
SJWLM019983_D1	10.0231	13.6188	140.84	25.101	0.211	48.7165	SJWLM019983	PALDWP
SJWLM019898_D1	9.021	12.6047	28.143	21.4457	0.2109	43.8405	SJWLM019898	PAJLTI
SJWLM019937_D1	11.9736	12.097	23.1824	42.4618	0.2099	33.1195	SJWLM019937	PALDTE
SJWLM019908_D1	10.8397	10.999	45.1183	22.1987	0.2069	33.2253	SJWLM019908	PAKYFC
SJWLM019972_D1	15.1084	7.7692	36.2535	32.6034	0.1919	35.5598	SJWLM019972	CAAAAO
SJWLM019905_D1	10.6458	17.3089	39.7443	42.2414	0.1878	35.1231	SJWLM019905	PAJNGH
SJWLM019977_M1	16.9154	7.393	25.0752	17.0708	0.1831	45.3933	SJWLM019977	PAJLUJ
SJWLM019901_D1	12.9288	7.8536	13.9659	18.7986	0.1826	40.0975	SJWLM019901	PAJPEW
SJWLM019909_D1	4.0244	11.8112	36.0967	25.3124	0.1718	36.0475	SJWLM019909	CAAAAS
SJWLM019897_D1	16.2278	13.859	32.2941	32.9179	0.1714	37.3536	SJWLM019897	PAKNRX
SJWLM019919_D1	11.2876	14.0428	59.3851	28.5865	0.1696	54.6603	SJWLM019919	PAJNBN
SJWLM019915_D1	11.938	5.0245	22.6738	17.2171	0.1578	29.8508	SJWLM019915	PAJPGY
SJWLM019946_D1	10.8912	7.7066	13.327	18.4046	0.1543	31.1561	SJWLM019946	PALGVY
SJWLM019913_D1	13.4678	7.7253	32.6225	19.4142	0.1523	37.6539	SJWLM019913	PAKKSE
SJWLM019956_D1	23.9415	11.2684	82.5059	16.484	0.1483	40.6722	SJWLM019956	PAKMSV
SJWLM019954_D1	11.8002	8.1189	90.7569	21.983	0.1481	42.7858	SJWLM019954	PAJNUS
SJWLM019905_R1	7.2575	13.3537	32.7216	36.1751	0.1462	27.4515	SJWLM019905	PAJNGH
SJWLM019942_D1	6.3097	10.5369	99.9028	25.4884	0.1449	5.9527	SJWLM019942	PAKXXF
SJWLM019962_D1	8.6944	15.9735	38.255	21.0008	0.1448	3.2182	SJWLM019962	PAJLPX
SJWLM019986_D1	14.1666	13.4914	20.9015	15.1686	0.1418	39.0603	SJWLM019986	PAKZER
SJWLM019902_D1	9.7888	7.5906	41.5048	25.6109	0.1408	26.2968	SJWLM019902	PAJMEL
SJWLM019950_D1	6.5233	6.5704	31.0817	35.4571	0.14	35.5346	SJWLM019950	PAKZFK
SJWLM019896_D1	7.8396	16.6129	32.9351	21.2368	0.1398	5.5542	SJWLM019896	PAKUIT
SJWLM019921_D1	7.6605	10.3174	67.3192	30.4064	0.1366	34.4069	SJWLM019921	PAJNZU
SJWLM019981_D1	13.6181	11.5652	40.5178	19.6039	0.1352	37.2565	SJWLM019981	PAEBXA
SJWLM019955_D1	10.9013	10.2229	37.4686	27.0454	0.1349	38.0134	SJWLM019955	PAKULH
SJWLM019917_D1	21.8398	6.9928	36.9642	16.6921	0.1326	31.276	SJWLM019917	PAKRZW
SJWLM019994_D1	11.3795	12.0414	33.7306	12.191	0.1316	31.9571	SJWLM019994	PAKNAL
SJWLM019944_D1	13.2366	11.1906	50.1652	27.1228	0.1277	27.6453	SJWLM019944	CAAAAB
SJWLM019920_R1	11.6993	16.6161	45.2425	27.403	0.1268	39.9409	SJWLM019920	PALFME
SJWLM019989_D1	17.6553	14.5337	34.8311	35.0734	0.122	29.1629	SJWLM019989	PAJMKI
SJWLM019922_D1	17.4229	9.6997	71.1863	41.2427	0.1217	45.3312	SJWLM019922	PAJNZS
SJWLM019943_D1	8.0963	11.6749	49.2795	26.0191	0.1194	37.1994	SJWLM019943	PAKGZX
SJWLM040009_D1	18.0965	6.4744	27.9096	18.0148	0.1156	37.3424	SJWLM040009	PAKXWB
SJWLM019933_D1	9.5602	8.7765	25.1301	51.3508	0.1062	37.5917	SJWLM019933	PAJMSE
SJWLM019912_D1	12.9476	10.4247	9.7245	18.4526	0.1062	41.323	SJWLM019912	PAJMUF
SJWLM040001_D1	16.0892	10.9923	16.5293	30.4211	0.1055	16.9295	SJWLM040001	PAJNNR
SJWLM019988_D1	16.7392	7.945	52.4716	16.9576	0.1039	53.7176	SJWLM019988	PAKWPM
SJWLM019930_D1	17.8422	12.8448	36.5376	32.9789	0.1038	32.98	SJWLM019930	PALLFB
SJWLM019936_D1	7.0729	14.0635	33.276	43.2006	0.1015	6.3111	SJWLM019936	PAKPDF
SJWLM019995_D1	17.3893	7.3228	22.0902	22.1159	0.0989	37.4409	SJWLM019995	PAKJGM
SJWLM019961_R1	8.5741	11.4916	70.6718	20.8931	0.0972	29.2042	SJWLM019961	PAJPDC
SJWLM019929_D1	7.831	10.3197	20.4557	13.4682	0.0961	55.8825	SJWLM019929	PAJNCC
SJWLM019890_D1	9.8938	9.3191	45.705	26.8026	0.0954	49.2756	SJWLM019890	PAJMLZ
SJWLM019951_D1	7.5211	15.2993	31.3373	32.7542	0.0939	35.7461	SJWLM019951	PAJMMY
SJWLM019920_D1	12.4842	13.9486	53.2939	17.9326	0.0932	43.6345	SJWLM019920	PALFME
SJWLM019931_D1	11.634	14.15	40.2887	17.2107	0.0906	54.0315	SJWLM019931	CAAAAP
SJWLM019965_D1	14.5261	6.8653	21.5951	38.7112	0.0875	1.9732	SJWLM019965	PAJLIP
SJWLM019987_D1	25.0357	9.2465	51.5433	15.2093	0.0871	42.5011	SJWLM019987	PAJLWT
SJWLM019932_D1	11.5281	11.0535	39.4353	38.8083	0.086	30.8517	SJWLM019932	PAJMFY
SJWLM019941_D1	10.6258	13.3991	22.992	18.0162	0.0854	31.5318	SJWLM019941	PAJPHA
SJWLM019887_D1	12.4953	10.8182	19.5259	31.2671	0.0842	34.2214	SJWLM019887	PALERC
SJWLM040006_D1	12.6053	15.8249	53.8531	26.4187	0.0833	43.706	SJWLM040006	PAJMVU
SJWLM019934_D1	12.397	10.0703	56.9022	26.931	0.0809	24.8873	SJWLM019934	PAJMLI
SJWLM040002_D1	20.4699	10.7708	26.2591	27.5817	0.0793	17.1791	SJWLM040002	PAJLLF
SJWLM040003_D1	20.9811	11.9457	45.3416	17.2657	0.0771	53.0429	SJWLM040003	PAEAFB
SJWLM019952_D1	10.8773	7.8176	57.8891	22.8701	0.0769	40.6243	SJWLM019952	PAJMJT
SJWLM019899_D1	18.9263	16.3018	48.0219	51.1296	0.0754	30.6475	SJWLM019899	PAJMRL
SJWLM019927_D1	13.7606	12.4011	26.3971	50.1002	0.0749	40.9183	SJWLM019927	CAAAAL
SJWLM019911_D1	28.5367	10.7613	15.8527	13.5641	0.0729	46.2806	SJWLM019911	PAJNTJ
SJWLM019940_D1	9.7178	8.4117	21.1847	23.1177	0.0726	44.639	SJWLM019940	PAECJB
SJWLM019925_D1	12.1159	19.5686	63.761	39.4526	0.0695	29.9643	SJWLM019925	PAJNZI
SJWLM019971_D1	13.0475	13.2775	39.1256	41.2676	0.0677	10.756	SJWLM019971	PAJLKC
SJWLM019892_D1	10.7365	8.7993	36.4117	15.784	0.0593	33.1074	SJWLM019892	PAJLTH
SJWLM019966_D1	6.5159	11.9989	22.7173	30.5612	0.0572	22.5826	SJWLM019966	PAJNEC
SJWLM019888_D1	8.8326	14.4998	54.8242	35.0136	0.0557	83.2647	SJWLM019888	PAKFYV
SJWLM019891_D1	10.952	11.8625	40.7639	26.3357	0.0554	35.1105	SJWLM019891	PAJNCZ
SJWLM019982_D1	6.4217	6.6355	24.5408	15.2703	0.0529	20.6874	SJWLM019982	PALKRS
SJWLM019886_D1	8.0037	11.6268	22.6366	33.0604	0.0492	22.4101	SJWLM019886	PAKRVH
SJWLM019958_D1	15.1816	11.1857	60.2555	41.1642	0.0488	44.5776	SJWLM019958	PAJMFU
SJWLM019939_D1	8.5447	11.0253	9.8502	32.4338	0.0459	37.4179	SJWLM019939	PAJNSL
SJWLM040008_D1	9.3906	13.7218	44.8469	26.2428	0.0451	19.1097	SJWLM040008	PADXAY
SJWLM019991_D1	19.7767	5.927	24.0438	34.7682	0.0409	18.5115	SJWLM019991	PAJMIZ
SJWLM019996_D1	21.9845	10.7138	25.3632	26.8207	0.0405	26.6471	SJWLM019996	PAKGMU
SJWLM019980_D1	16.121	9.6256	28.8742	12.7396	0.0395	35.3786	SJWLM019980	PAKECR
SJWLM019992_D1	6.5545	8.4689	11.3815	19.7975	0.039	10.6401	SJWLM019992	PAJNDU
SJWLM019976_D1	11.623	10.6642	26.5016	19.04	0.0381	31.8305	SJWLM019976	PAJLKR
SJWLM019964_D1	12.5439	4.4273	14.7708	28.9589	0.0351	15.57	SJWLM019964	PAJNUP
SJWLM040010_D1	2.1746	10.2365	68.7592	28.5735	0.0348	3.1778	SJWLM040010	PAKGED
SJWLM019895_D1	11.1264	12.2127	24.81	33.1236	0.0337	37.6445	SJWLM019895	PAJNYT
SJWLM019999_D1	12.4424	11.0629	39.5656	11.8159	0.0287	37.9258	SJWLM019999	PAKFME
SJWLM019969_D1	7.9987	9.917	23.0401	27.5225	0.0274	19.1767	SJWLM019969	PAJPDN
SJWLM019979_D1	12.9375	7.4101	39.8407	23.8765	0.0247	41.4287	SJWLM019979	PALKCW
SJWLM019889_D1	20.0128	6.5866	10.5476	19.8164	0.0216	49.0944	SJWLM019889	PAKSCC
SJWLM019974_D1	16.5742	12.5568	53.458	34.0512	0.0209	21.7728	SJWLM019974	PAKKNS
SJWLM019968_D1	9.788	6.0278	9.5939	14.4846	0.0145	30.544	SJWLM019968	PAKMUB
SJWLM019973_D1	9.5111	4.8342	49.4052	8.2781	0.014	17.1187	SJWLM019973	PAJNAV
SJWLM040004_D1	9.4776	8.7302	14.3838	18.7293	0.013	16.457	SJWLM040004	PAJNVX
SJWLM019967_D1	12.0388	11.1593	6.8732	15.5381	0.0061	19.8922	SJWLM019967	PAJNAA
SJWLM019926_D1	13.5975	4.4799	1.6266	18.2173	0.0057	12.3551	SJWLM019926	CAAAAM
SJWLM019935_D1	9.6135	9.9863	19.3248	23.5583	0.0035	32.1765	SJWLM019935	PAKVET
SJWLM019894_D1	13.9385	7.8376	19.6601	18.6858	0	33.7409	SJWLM019894	PAJMKN
