# Supplementary material for: TERT Expression in Wilms Tumor Is Regulated by Promoter Mutation or Hypermethylation, WT1, and N-MYC
Source: Cancers (Basel). 2022 Mar 25;14(7):1655. doi: 10.3390/cancers14071655 (PMC8996936; doi:10.3390/cancers14071655)
Supplement: Supplementary file 1 [file cancers-14-01655-s001.zip › Supplementary Data File S2.xlsx]

## Sheet: WiT49 parental vs 1D9 WT1KO
NAME	GS<br> follow link to MSigDB	GS DETAILS	SIZE	ES	NES	NOM p-val	FDR q-val	FWER p-val	RANK AT MAX	LEADING EDGE
GO_RNA_DEPENDENT_DNA_BIOSYNTHETIC_PROCESS	GO_RNA_DEPENDENT_DNA_BIOSYNTHETIC_PROCESS	Details ...	70	0.49461	2.48296	0	0.048	0	1108	tags=4%, list=5%, signal=5%
GO_POSITIVE_REGULATION_OF_POSTTRANSCRIPTIONAL_GENE_SILENCING	GO_POSITIVE_REGULATION_OF_POSTTRANSCRIPTIONAL_GENE_SILENCING	Details ...	24	0.695104	2.46016	0	0.048	0.048	35	tags=4%, list=0%, signal=4%
GO_NEGATIVE_REGULATION_OF_CELLULAR_SENESCENCE	GO_NEGATIVE_REGULATION_OF_CELLULAR_SENESCENCE	Details ...	19	0.68153	2.45918	0	0.048	0.048	59	tags=5%, list=0%, signal=5%
GO_DNA_STRAND_ELONGATION	GO_DNA_STRAND_ELONGATION	Details ...	21	0.749379	2.4484	0	0.048	0.048	59	tags=5%, list=0%, signal=5%
GO_TELOMERE_MAINTENANCE_VIA_TELOMERE_LENGTHENING	GO_TELOMERE_MAINTENANCE_VIA_TELOMERE_LENGTHENING	Details ...	77	0.465338	2.44068	0	0.048	0.048	1108	tags=4%, list=5%, signal=4%
GO_NEGATIVE_REGULATION_OF_CELL_AGING	GO_NEGATIVE_REGULATION_OF_CELL_AGING	Details ...	23	0.643054	2.42852	0	0.048	0.048	59	tags=4%, list=0%, signal=4%
GO_TRANSCRIPTION_ELONGATION_FACTOR_COMPLEX	GO_TRANSCRIPTION_ELONGATION_FACTOR_COMPLEX	Details ...	50	0.557607	2.39164	0	0.048	0.048	500	tags=4%, list=2%, signal=4%
GO_NUCLEOTIDE_SUGAR_METABOLIC_PROCESS	GO_NUCLEOTIDE_SUGAR_METABOLIC_PROCESS	Details ...	16	0.728304	2.38858	0	0.048	0.048	8	tags=6%, list=0%, signal=6%
GO_MEMBRANE_DISASSEMBLY	GO_MEMBRANE_DISASSEMBLY	Details ...	16	0.745741	2.08958	0	0.126669	0.369	72	tags=6%, list=0%, signal=6%
GO_PROTEIN_LOCALIZATION_TO_CHROMOSOME_TELOMERIC_REGION	GO_PROTEIN_LOCALIZATION_TO_CHROMOSOME_TELOMERIC_REGION	Details ...	28	0.62979	2.06054	0	0.135688	0.515	59	tags=4%, list=0%, signal=4%
GO_NUCLEAR_ENVELOPE_ORGANIZATION	GO_NUCLEAR_ENVELOPE_ORGANIZATION	Details ...	50	0.482725	2.04154	0	0.144027	0.598	72	tags=2%, list=0%, signal=2%
GO_MICROTUBULE_PLUS_END_BINDING	GO_MICROTUBULE_PLUS_END_BINDING	Details ...	17	0.693485	2.0404	0	0.136025	0.598	106	tags=6%, list=0%, signal=6%
GO_REGULATION_OF_PROTEIN_HOMODIMERIZATION_ACTIVITY	GO_REGULATION_OF_PROTEIN_HOMODIMERIZATION_ACTIVITY	Details ...	21	0.571879	2.0346	0	0.129254	0.598	526	tags=10%, list=2%, signal=10%
GO_MICROTUBULE_NUCLEATION	GO_MICROTUBULE_NUCLEATION	Details ...	25	0.449062	2.03411	0	0.12345	0.598	142	tags=4%, list=1%, signal=4%
GO_REGULATION_OF_EARLY_ENDOSOME_TO_LATE_ENDOSOME_TRANSPORT	GO_REGULATION_OF_EARLY_ENDOSOME_TO_LATE_ENDOSOME_TRANSPORT	Details ...	17	0.755907	2.03137	0	0.11842	0.598	116	tags=6%, list=1%, signal=6%
GO_ESTABLISHMENT_OF_PROTEIN_LOCALIZATION_TO_CHROMOSOME	GO_ESTABLISHMENT_OF_PROTEIN_LOCALIZATION_TO_CHROMOSOME	Details ...	27	0.679225	2.03	0	0.114018	0.598	59	tags=4%, list=0%, signal=4%
GO_CYTOPLASMIC_TRANSLATION	GO_CYTOPLASMIC_TRANSLATION	Details ...	93	0.388173	2.02973	0	0.110135	0.598	37	tags=2%, list=0%, signal=2%
GO_REGULATION_OF_MITOTIC_SPINDLE_ASSEMBLY	GO_REGULATION_OF_MITOTIC_SPINDLE_ASSEMBLY	Details ...	19	0.553635	2.02953	0	0.106683	0.598	142	tags=5%, list=1%, signal=5%
GO_OXIDOREDUCTASE_ACTIVITY_ACTING_ON_NAD_P_H_QUINONE_OR_SIMILAR_COMPOUND_AS_ACCEPTOR	GO_OXIDOREDUCTASE_ACTIVITY_ACTING_ON_NAD_P_H_QUINONE_OR_SIMILAR_COMPOUND_AS_ACCEPTOR	Details ...	50	0.502667	2.02709	0	0.103594	0.598	772	tags=6%, list=4%, signal=6%
GO_ESTABLISHMENT_OF_PROTEIN_LOCALIZATION_TO_TELOMERE	GO_ESTABLISHMENT_OF_PROTEIN_LOCALIZATION_TO_TELOMERE	Details ...	18	0.739914	2.02589	0	0.100815	0.598	59	tags=6%, list=0%, signal=6%
GO_REGULATION_OF_PRODUCTION_OF_SMALL_RNA_INVOLVED_IN_GENE_SILENCING_BY_RNA	GO_REGULATION_OF_PRODUCTION_OF_SMALL_RNA_INVOLVED_IN_GENE_SILENCING_BY_RNA		20	0.779253	2.0166	0	0.105953	0.598	59	tags=10%, list=0%, signal=10%
GO_NUCLEOSIDE_MONOPHOSPHATE_KINASE_ACTIVITY	GO_NUCLEOSIDE_MONOPHOSPHATE_KINASE_ACTIVITY		22	0.655298	2.01518	0	0.103319	0.598	21	tags=9%, list=0%, signal=9%
GO_NUCLEOID	GO_NUCLEOID		42	0.515956	2.00013	0	0.114801	0.598	59	tags=2%, list=0%, signal=2%
GO_TOR_SIGNALING	GO_TOR_SIGNALING		105	0.438611	1.99811	0	0.112018	0.598	1982	tags=8%, list=9%, signal=8%
GO_PRODUCTION_OF_SMALL_RNA_INVOLVED_IN_GENE_SILENCING_BY_RNA	GO_PRODUCTION_OF_SMALL_RNA_INVOLVED_IN_GENE_SILENCING_BY_RNA		49	0.632527	1.99666	0	0.109457	0.598	59	tags=4%, list=0%, signal=4%
GO_DE_NOVO_PROTEIN_FOLDING	GO_DE_NOVO_PROTEIN_FOLDING		36	0.520731	1.98687	0	0.113577	0.707	312	tags=8%, list=1%, signal=8%
GO_TELOMERASE_RNA_BINDING	GO_TELOMERASE_RNA_BINDING		21	0.684624	1.98148	0	0.113406	0.707	59	tags=5%, list=0%, signal=5%
GO_REGULATION_OF_CLATHRIN_DEPENDENT_ENDOCYTOSIS	GO_REGULATION_OF_CLATHRIN_DEPENDENT_ENDOCYTOSIS		16	0.620195	1.97092	0	0.116774	0.707	168	tags=13%, list=1%, signal=13%
GO_CELL_AGING	GO_CELL_AGING		96	0.429626	1.95993	0	0.117746	0.707	162	tags=3%, list=1%, signal=3%
GO_REGULATION_OF_CELL_AGING	GO_REGULATION_OF_CELL_AGING		42	0.423125	1.94835	0	0.129647	0.707	59	tags=2%, list=0%, signal=2%
GO_POSITIVE_REGULATION_OF_TOR_SIGNALING	GO_POSITIVE_REGULATION_OF_TOR_SIGNALING		34	0.422937	1.94611	0	0.127013	0.707	35	tags=3%, list=0%, signal=3%
GO_PROTEIN_PHOSPHATASE_2A_BINDING	GO_PROTEIN_PHOSPHATASE_2A_BINDING		30	0.685238	1.93442	0	0.130634	0.707	556	tags=10%, list=3%, signal=10%
GO_REGULATION_OF_CYTOPLASMIC_TRANSLATION	GO_REGULATION_OF_CYTOPLASMIC_TRANSLATION		28	0.661698	1.92661	0	0.134821	0.764	37	tags=7%, list=0%, signal=7%
GO_TELOMERASE_HOLOENZYME_COMPLEX	GO_TELOMERASE_HOLOENZYME_COMPLEX		21	0.717719	1.91291	0	0.136457	0.764	59	tags=5%, list=0%, signal=5%
GO_CELLULAR_SENESCENCE	GO_CELLULAR_SENESCENCE		61	0.389778	1.91262	0	0.13393	0.764	162	tags=3%, list=1%, signal=3%
GO_CYTOSOLIC_TRANSPORT	GO_CYTOSOLIC_TRANSPORT		147	0.319911	1.88563	0	0.139416	0.764	397	tags=3%, list=2%, signal=3%
GO_REGULATION_OF_DEFENSE_RESPONSE_TO_VIRUS_BY_VIRUS	GO_REGULATION_OF_DEFENSE_RESPONSE_TO_VIRUS_BY_VIRUS		27	0.774996	1.88323	0	0.136946	0.764	200	tags=11%, list=1%, signal=11%
GO_AMYLOID_BETA_FORMATION	GO_AMYLOID_BETA_FORMATION		27	0.39656	1.88189	0	0.134605	0.764	89	tags=4%, list=0%, signal=4%
GO_HISTONE_PHOSPHORYLATION	GO_HISTONE_PHOSPHORYLATION		34	0.458731	1.87894	0	0.13422	0.764	2767	tags=9%, list=13%, signal=10%
GO_GLUCURONOSYLTRANSFERASE_ACTIVITY	GO_GLUCURONOSYLTRANSFERASE_ACTIVITY		15	0.814709	1.87806	0	0.132065	0.764	62	tags=20%, list=0%, signal=20%
GO_CHAPERONE_COFACTOR_DEPENDENT_PROTEIN_REFOLDING	GO_CHAPERONE_COFACTOR_DEPENDENT_PROTEIN_REFOLDING		27	0.575961	1.86036	0	0.14208	0.764	312	tags=11%, list=1%, signal=11%
GO_DNA_POLYMERASE_ACTIVITY	GO_DNA_POLYMERASE_ACTIVITY		30	0.458878	1.85177	0	0.143755	0.764	59	tags=3%, list=0%, signal=3%
GO_PURINE_NUCLEOSIDE_MONOPHOSPHATE_METABOLIC_PROCESS	GO_PURINE_NUCLEOSIDE_MONOPHOSPHATE_METABOLIC_PROCESS		21	0.542494	1.8473	0	0.141528	0.764	21	tags=5%, list=0%, signal=5%
GO_CELLULAR_RESPONSE_TO_STARVATION	GO_CELLULAR_RESPONSE_TO_STARVATION		134	0.388318	1.8436	0	0.142127	0.764	2414	tags=7%, list=11%, signal=8%
GO_POSITIVE_REGULATION_OF_TELOMERE_MAINTENANCE	GO_POSITIVE_REGULATION_OF_TELOMERE_MAINTENANCE		48	0.493469	1.84233	0	0.144351	0.764	1108	tags=4%, list=5%, signal=4%
GO_LATERAL_PLASMA_MEMBRANE	GO_LATERAL_PLASMA_MEMBRANE		50	0.506975	1.83311	0	0.151286	0.764	1245	tags=12%, list=6%, signal=13%
GO_GUANOSINE_CONTAINING_COMPOUND_METABOLIC_PROCESS	GO_GUANOSINE_CONTAINING_COMPOUND_METABOLIC_PROCESS		24	0.515973	1.83097	0	0.150604	0.764	21	tags=4%, list=0%, signal=4%
GO_CONTRACTILE_ACTIN_FILAMENT_BUNDLE_ASSEMBLY	GO_CONTRACTILE_ACTIN_FILAMENT_BUNDLE_ASSEMBLY		84	0.453382	1.82264	0	0.153142	0.764	629	tags=7%, list=3%, signal=7%
GO_TRANSLATION_INITIATION_FACTOR_BINDING	GO_TRANSLATION_INITIATION_FACTOR_BINDING		30	0.698558	1.82073	0	0.150996	0.764	69	tags=7%, list=0%, signal=7%
GO_NUCLEOSIDE_MONOPHOSPHATE_METABOLIC_PROCESS	GO_NUCLEOSIDE_MONOPHOSPHATE_METABOLIC_PROCESS		31	0.56942	1.82	0	0.148936	0.764	21	tags=6%, list=0%, signal=6%
GO_SODIUM_CHANNEL_REGULATOR_ACTIVITY	GO_SODIUM_CHANNEL_REGULATOR_ACTIVITY		24	0.659718	1.81916	0	0.146957	0.764	680	tags=17%, list=3%, signal=17%
GO_POSITIVE_REGULATION_OF_TELOMERE_MAINTENANCE_VIA_TELOMERE_LENGTHENING	GO_POSITIVE_REGULATION_OF_TELOMERE_MAINTENANCE_VIA_TELOMERE_LENGTHENING		37	0.556147	1.81491	0	0.145054	0.764	1108	tags=5%, list=5%, signal=6%
GO_CHAPERONE_MEDIATED_PROTEIN_FOLDING	GO_CHAPERONE_MEDIATED_PROTEIN_FOLDING		52	0.483039	1.8109	0	0.145673	0.764	312	tags=6%, list=1%, signal=6%
GO_REGULATION_OF_TELOMERE_MAINTENANCE_VIA_TELOMERE_LENGTHENING	GO_REGULATION_OF_TELOMERE_MAINTENANCE_VIA_TELOMERE_LENGTHENING		57	0.406496	1.8098	0	0.143864	0.764	1108	tags=4%, list=5%, signal=4%
GO_ESTABLISHMENT_OF_EPITHELIAL_CELL_POLARITY	GO_ESTABLISHMENT_OF_EPITHELIAL_CELL_POLARITY		28	0.519017	1.80567	0	0.145681	0.764	271	tags=7%, list=1%, signal=7%
GO_POSITIVE_REGULATION_OF_VIRAL_LIFE_CYCLE	GO_POSITIVE_REGULATION_OF_VIRAL_LIFE_CYCLE		56	0.569913	1.80422	0	0.143937	0.764	1392	tags=7%, list=7%, signal=8%
GO_AZOLE_TRANSPORT	GO_AZOLE_TRANSPORT		19	0.717876	1.79975	0	0.14576	0.807	169	tags=16%, list=1%, signal=16%
GO_NCRNA_CATABOLIC_PROCESS	GO_NCRNA_CATABOLIC_PROCESS		25	0.486751	1.79898	0	0.144075	0.807	35	tags=4%, list=0%, signal=4%
GO_NUCLEUS_ORGANIZATION	GO_NUCLEUS_ORGANIZATION		114	0.428288	1.7963	0	0.147259	0.807	3300	tags=9%, list=15%, signal=10%
GO_FICOLIN_1_RICH_GRANULE	GO_FICOLIN_1_RICH_GRANULE		110	0.460568	1.79378	0	0.147079	0.807	1526	tags=6%, list=7%, signal=7%
GO_POSITIVE_REGULATION_OF_RNA_METABOLIC_PROCESS	GO_POSITIVE_REGULATION_OF_RNA_METABOLIC_PROCESS		63	0.425481	1.79374	0	0.145455	0.807	35	tags=2%, list=0%, signal=2%
GO_INCLUSION_BODY_ASSEMBLY	GO_INCLUSION_BODY_ASSEMBLY		17	0.4881	1.78879	0	0.14531	0.807	142	tags=6%, list=1%, signal=6%
GO_POSITIVE_REGULATION_OF_VIRAL_PROCESS	GO_POSITIVE_REGULATION_OF_VIRAL_PROCESS		98	0.465333	1.78843	0	0.143766	0.807	1392	tags=4%, list=7%, signal=4%
GO_NEGATIVE_REGULATION_OF_RNA_METABOLIC_PROCESS	GO_NEGATIVE_REGULATION_OF_RNA_METABOLIC_PROCESS		47	0.440392	1.78569	0	0.146472	0.909	59	tags=2%, list=0%, signal=2%
GO_SULFUR_COMPOUND_TRANSMEMBRANE_TRANSPORTER_ACTIVITY	GO_SULFUR_COMPOUND_TRANSMEMBRANE_TRANSPORTER_ACTIVITY		29	0.648723	1.78428	0	0.144957	0.909	1161	tags=17%, list=5%, signal=18%
GO_PROTEIN_LOCALIZATION_TO_ENDOSOME	GO_PROTEIN_LOCALIZATION_TO_ENDOSOME		24	0.420508	1.78273	0	0.146298	0.909	116	tags=4%, list=1%, signal=4%
GO_INTERACTION_WITH_HOST	GO_INTERACTION_WITH_HOST		172	0.475328	1.7808	0	0.147189	0.909	2712	tags=12%, list=13%, signal=14%
GO_MICROTUBULE_PLUS_END	GO_MICROTUBULE_PLUS_END		20	0.505441	1.77805	0	0.14573	0.909	106	tags=5%, list=0%, signal=5%
GO_POSITIVE_REGULATION_OF_MICROTUBULE_POLYMERIZATION_OR_DEPOLYMERIZATION	GO_POSITIVE_REGULATION_OF_MICROTUBULE_POLYMERIZATION_OR_DEPOLYMERIZATION		29	0.600608	1.77785	0	0.144314	0.909	911	tags=10%, list=4%, signal=11%
GO_GOLGI_STACK	GO_GOLGI_STACK		119	0.393773	1.77648	0	0.142938	0.909	700	tags=5%, list=3%, signal=5%
GO_REGULATORY_RNA_BINDING	GO_REGULATORY_RNA_BINDING		31	0.568744	1.77118	0	0.142421	0.909	35	tags=3%, list=0%, signal=3%
GO_OUTER_MITOCHONDRIAL_MEMBRANE_PROTEIN_COMPLEX	GO_OUTER_MITOCHONDRIAL_MEMBRANE_PROTEIN_COMPLEX		15	0.720236	1.76779	0	0.145557	0.909	40	tags=7%, list=0%, signal=7%
GO_REGULATION_OF_POSTTRANSCRIPTIONAL_GENE_SILENCING	GO_REGULATION_OF_POSTTRANSCRIPTIONAL_GENE_SILENCING		109	0.522027	1.76632	0	0.145196	0.909	1754	tags=6%, list=8%, signal=7%
GO_TRNA_BINDING	GO_TRNA_BINDING		57	0.336161	1.76407	0	0.143883	0.909	59	tags=2%, list=0%, signal=2%
GO_SIGNAL_TRANSDUCTION_BY_P53_CLASS_MEDIATOR	GO_SIGNAL_TRANSDUCTION_BY_P53_CLASS_MEDIATOR		248	0.248833	1.76118	0	0.145479	0.909	909	tags=3%, list=4%, signal=3%
GO_VESICLE_MEDIATED_TRANSPORT_BETWEEN_ENDOSOMAL_COMPARTMENTS	GO_VESICLE_MEDIATED_TRANSPORT_BETWEEN_ENDOSOMAL_COMPARTMENTS		41	0.465073	1.76092	0	0.144197	0.909	116	tags=2%, list=1%, signal=2%
GO_POSITIVE_REGULATION_OF_CELL_CYCLE_PHASE_TRANSITION	GO_POSITIVE_REGULATION_OF_CELL_CYCLE_PHASE_TRANSITION		87	0.456853	1.75751	0	0.143883	0.909	1108	tags=7%, list=5%, signal=7%
GO_NEGATIVE_REGULATION_OF_GENE_SILENCING	GO_NEGATIVE_REGULATION_OF_GENE_SILENCING		27	0.576541	1.75572	0	0.142654	0.909	358	tags=7%, list=2%, signal=8%
GO_REGULATION_OF_TELOMERE_CAPPING	GO_REGULATION_OF_TELOMERE_CAPPING		26	0.652487	1.75478	0	0.142576	0.909	1108	tags=8%, list=5%, signal=8%
GO_POSITIVE_REGULATION_OF_CELL_CYCLE_PROCESS	GO_POSITIVE_REGULATION_OF_CELL_CYCLE_PROCESS		248	0.329091	1.75389	0	0.141394	0.909	1209	tags=4%, list=6%, signal=5%
GO_PROLINE_RICH_REGION_BINDING	GO_PROLINE_RICH_REGION_BINDING		18	0.389357	1.75276	0	0.140241	0.909	536	tags=6%, list=3%, signal=6%
GO_REGULATION_OF_VASCULAR_ENDOTHELIAL_GROWTH_FACTOR_RECEPTOR_SIGNALING_PATHWAY	GO_REGULATION_OF_VASCULAR_ENDOTHELIAL_GROWTH_FACTOR_RECEPTOR_SIGNALING_PATHWAY		29	0.533338	1.75241	0	0.139984	0.909	1122	tags=17%, list=5%, signal=18%
GO_PEPTIDYL_THREONINE_MODIFICATION	GO_PEPTIDYL_THREONINE_MODIFICATION		111	0.345186	1.75086	0	0.139734	0.909	1782	tags=7%, list=8%, signal=8%
GO_MICROTUBULE_END	GO_MICROTUBULE_END		27	0.458284	1.74803	0	0.139451	0.909	106	tags=4%, list=0%, signal=4%
GO_RACEMASE_AND_EPIMERASE_ACTIVITY	GO_RACEMASE_AND_EPIMERASE_ACTIVITY		16	0.663224	1.74677	0	0.139533	0.956	61	tags=6%, list=0%, signal=6%
GO_MIRNA_BINDING	GO_MIRNA_BINDING		26	0.580115	1.74614	0	0.139498	0.956	35	tags=4%, list=0%, signal=4%
GO_MONOSACCHARIDE_BINDING	GO_MONOSACCHARIDE_BINDING		60	0.50542	1.74485	0	0.138446	0.956	774	tags=8%, list=4%, signal=9%
GO_PROTEIN_C_TERMINUS_BINDING	GO_PROTEIN_C_TERMINUS_BINDING		177	0.288403	1.74338	0	0.14078	0.956	839	tags=3%, list=4%, signal=3%
GO_REGULATION_OF_ACTIN_FILAMENT_BUNDLE_ASSEMBLY	GO_REGULATION_OF_ACTIN_FILAMENT_BUNDLE_ASSEMBLY		82	0.418931	1.74021	0	0.140731	0.956	1465	tags=9%, list=7%, signal=9%
GO_POSITIVE_REGULATION_OF_MITOTIC_CELL_CYCLE	GO_POSITIVE_REGULATION_OF_MITOTIC_CELL_CYCLE		140	0.346866	1.7349	0	0.146127	0.956	964	tags=4%, list=5%, signal=4%
GO_SULFUR_COMPOUND_TRANSPORT	GO_SULFUR_COMPOUND_TRANSPORT		37	0.65618	1.73396	0	0.146503	0.956	1161	tags=16%, list=5%, signal=17%
GO_TELOMERIC_DNA_BINDING	GO_TELOMERIC_DNA_BINDING		36	0.444101	1.73329	0	0.147094	0.956	59	tags=3%, list=0%, signal=3%
GO_REGULATION_OF_GENE_SILENCING	GO_REGULATION_OF_GENE_SILENCING		137	0.497277	1.73069	0	0.146794	0.956	1754	tags=6%, list=8%, signal=6%
GO_BETA_TUBULIN_BINDING	GO_BETA_TUBULIN_BINDING		35	0.513205	1.73028	0	0.145743	0.956	1624	tags=9%, list=8%, signal=9%
GO_POSITIVE_REGULATION_OF_BMP_SIGNALING_PATHWAY	GO_POSITIVE_REGULATION_OF_BMP_SIGNALING_PATHWAY		28	0.520136	1.72306	0	0.148169	1	379	tags=7%, list=2%, signal=7%
GO_CLATHRIN_DEPENDENT_ENDOCYTOSIS	GO_CLATHRIN_DEPENDENT_ENDOCYTOSIS		40	0.551353	1.72027	0	0.148453	1	1477	tags=13%, list=7%, signal=13%
GO_CELLULAR_RESPONSE_TO_EXTRACELLULAR_STIMULUS	GO_CELLULAR_RESPONSE_TO_EXTRACELLULAR_STIMULUS		228	0.36728	1.72027	0	0.147417	1	2414	tags=11%, list=11%, signal=12%
GO_PYRIMIDINE_NUCLEOTIDE_BIOSYNTHETIC_PROCESS	GO_PYRIMIDINE_NUCLEOTIDE_BIOSYNTHETIC_PROCESS		43	0.442074	1.72005	0	0.147096	1	2459	tags=9%, list=12%, signal=10%
GO_NEUTRAL_AMINO_ACID_TRANSPORT	GO_NEUTRAL_AMINO_ACID_TRANSPORT		29	0.634412	1.71968	0	0.146684	1	1065	tags=17%, list=5%, signal=18%
GO_TELOMERE_ORGANIZATION	GO_TELOMERE_ORGANIZATION		165	0.340641	1.714	0	0.148069	1	1108	tags=3%, list=5%, signal=3%
GO_PHOSPHOTRANSFERASE_ACTIVITY_PHOSPHATE_GROUP_AS_ACCEPTOR	GO_PHOSPHOTRANSFERASE_ACTIVITY_PHOSPHATE_GROUP_AS_ACCEPTOR		38	0.515438	1.71372	0	0.147955	1	21	tags=5%, list=0%, signal=5%
GO_REGULATION_OF_ACTOMYOSIN_STRUCTURE_ORGANIZATION	GO_REGULATION_OF_ACTOMYOSIN_STRUCTURE_ORGANIZATION		78	0.416396	1.71371	0	0.146975	1	629	tags=6%, list=3%, signal=7%
GO_NUCLEOSIDE_BISPHOSPHATE_BIOSYNTHETIC_PROCESS	GO_NUCLEOSIDE_BISPHOSPHATE_BIOSYNTHETIC_PROCESS		65	0.412275	1.71325	0	0.146014	1	1597	tags=8%, list=7%, signal=8%
GO_PURINE_CONTAINING_COMPOUND_BIOSYNTHETIC_PROCESS	GO_PURINE_CONTAINING_COMPOUND_BIOSYNTHETIC_PROCESS		157	0.411403	1.71321	0	0.145071	1	1639	tags=8%, list=8%, signal=8%
GO_GOLGI_CISTERNA	GO_GOLGI_CISTERNA		90	0.412607	1.71192	0	0.144795	1	700	tags=6%, list=3%, signal=6%
GO_NEGATIVE_REGULATION_OF_WNT_SIGNALING_PATHWAY	GO_NEGATIVE_REGULATION_OF_WNT_SIGNALING_PATHWAY		189	0.386982	1.71178	0	0.143881	1	3097	tags=13%, list=15%, signal=15%
GO_VIRAL_LIFE_CYCLE	GO_VIRAL_LIFE_CYCLE		275	0.400271	1.70601	0	0.147429	1	3477	tags=11%, list=16%, signal=13%
GO_PIGMENTATION	GO_PIGMENTATION		84	0.371154	1.70529	0	0.147807	1	1654	tags=8%, list=8%, signal=9%
GO_NUCLEOBASE_CONTAINING_COMPOUND_KINASE_ACTIVITY	GO_NUCLEOBASE_CONTAINING_COMPOUND_KINASE_ACTIVITY		43	0.490601	1.70522	0	0.146891	1	21	tags=5%, list=0%, signal=5%
GO_ENTRY_INTO_OTHER_ORGANISM_INVOLVED_IN_SYMBIOTIC_INTERACTION	GO_ENTRY_INTO_OTHER_ORGANISM_INVOLVED_IN_SYMBIOTIC_INTERACTION		106	0.543983	1.70498	0	0.145992	1	743	tags=9%, list=3%, signal=10%
GO_VENOUS_BLOOD_VESSEL_DEVELOPMENT	GO_VENOUS_BLOOD_VESSEL_DEVELOPMENT		15	0.792854	1.7037	0	0.1463	1	127	tags=13%, list=1%, signal=13%
GO_REGULATION_OF_AMYLOID_BETA_FORMATION	GO_REGULATION_OF_AMYLOID_BETA_FORMATION		21	0.409685	1.70286	0	0.145422	1	89	tags=5%, list=0%, signal=5%
GO_DEMETHYLASE_ACTIVITY	GO_DEMETHYLASE_ACTIVITY		34	0.380978	1.69842	0	0.147763	1	878	tags=6%, list=4%, signal=6%
GO_DNA_DAMAGE_RESPONSE_SIGNAL_TRANSDUCTION_BY_P53_CLASS_MEDIATOR	GO_DNA_DAMAGE_RESPONSE_SIGNAL_TRANSDUCTION_BY_P53_CLASS_MEDIATOR		99	0.362074	1.69807	0	0.147423	1	895	tags=5%, list=4%, signal=5%
GO_AMINO_ACID_TRANSMEMBRANE_TRANSPORTER_ACTIVITY	GO_AMINO_ACID_TRANSMEMBRANE_TRANSPORTER_ACTIVITY		56	0.536436	1.69801	0	0.146559	1	1065	tags=13%, list=5%, signal=13%
GO_POSITIVE_REGULATION_OF_NITRIC_OXIDE_SYNTHASE_ACTIVITY	GO_POSITIVE_REGULATION_OF_NITRIC_OXIDE_SYNTHASE_ACTIVITY		18	0.693971	1.69644	0	0.146617	1	204	tags=11%, list=1%, signal=11%
GO_THIOESTER_BIOSYNTHETIC_PROCESS	GO_THIOESTER_BIOSYNTHETIC_PROCESS		50	0.490904	1.69048	0	0.152372	1	1597	tags=10%, list=7%, signal=11%
GO_POSITIVE_REGULATION_OF_EPITHELIAL_TO_MESENCHYMAL_TRANSITION	GO_POSITIVE_REGULATION_OF_EPITHELIAL_TO_MESENCHYMAL_TRANSITION		45	0.553234	1.6893	0	0.15362	1	895	tags=11%, list=4%, signal=12%
GO_NUCLEOSIDE_SALVAGE	GO_NUCLEOSIDE_SALVAGE		15	0.694343	1.68571	0	0.159144	1	447	tags=13%, list=2%, signal=14%
GO_TRANSFERASE_ACTIVITY_TRANSFERRING_HEXOSYL_GROUPS	GO_TRANSFERASE_ACTIVITY_TRANSFERRING_HEXOSYL_GROUPS		172	0.385761	1.68412	0	0.161372	1	2018	tags=9%, list=9%, signal=10%
GO_PHOSPHATIDIC_ACID_BINDING	GO_PHOSPHATIDIC_ACID_BINDING		19	0.520798	1.68387	0	0.160435	1	130	tags=5%, list=1%, signal=5%
GO_TRANS_GOLGI_NETWORK_MEMBRANE	GO_TRANS_GOLGI_NETWORK_MEMBRANE		82	0.384103	1.68174	0	0.164896	1	1603	tags=7%, list=8%, signal=8%
GO_NEGATIVE_REGULATION_OF_INTRINSIC_APOPTOTIC_SIGNALING_PATHWAY	GO_NEGATIVE_REGULATION_OF_INTRINSIC_APOPTOTIC_SIGNALING_PATHWAY		85	0.422875	1.68135	0	0.163945	1	2426	tags=8%, list=11%, signal=9%
GO_GENE_SILENCING_BY_RNA	GO_GENE_SILENCING_BY_RNA		180	0.335969	1.68116	0	0.16301	1	1754	tags=6%, list=8%, signal=6%
GO_TRANSITION_METAL_ION_TRANSMEMBRANE_TRANSPORTER_ACTIVITY	GO_TRANSITION_METAL_ION_TRANSMEMBRANE_TRANSPORTER_ACTIVITY		34	0.55308	1.68081	0	0.162568	1	1516	tags=12%, list=7%, signal=13%
GO_RECYCLING_ENDOSOME	GO_RECYCLING_ENDOSOME		158	0.411923	1.67654	0	0.166169	1	3095	tags=13%, list=15%, signal=15%
GO_ENDOPLASMIC_RETICULUM_LUMEN	GO_ENDOPLASMIC_RETICULUM_LUMEN		254	0.489289	1.674	0	0.169879	1	1740	tags=13%, list=8%, signal=14%
GO_REGULATION_OF_SPINDLE_ASSEMBLY	GO_REGULATION_OF_SPINDLE_ASSEMBLY		26	0.534193	1.66846	0	0.174674	1	1108	tags=8%, list=5%, signal=8%
GO_REGULATION_OF_PROTEIN_DEPHOSPHORYLATION	GO_REGULATION_OF_PROTEIN_DEPHOSPHORYLATION		118	0.372531	1.66819	0	0.173692	1	2551	tags=10%, list=12%, signal=11%
GO_PSEUDOPODIUM	GO_PSEUDOPODIUM		15	0.54501	1.66467	0	0.174135	1	116	tags=7%, list=1%, signal=7%
GO_REGULATION_OF_PROTEIN_BINDING	GO_REGULATION_OF_PROTEIN_BINDING		193	0.363112	1.66413	0	0.174695	1	2697	tags=11%, list=13%, signal=12%
GO_DIVALENT_INORGANIC_CATION_TRANSMEMBRANE_TRANSPORTER_ACTIVITY	GO_DIVALENT_INORGANIC_CATION_TRANSMEMBRANE_TRANSPORTER_ACTIVITY		22	0.559076	1.66401	0	0.173735	1	1516	tags=14%, list=7%, signal=15%
GO_RESPONSE_TO_HEAT	GO_RESPONSE_TO_HEAT		147	0.38745	1.66113	0	0.174697	1	1961	tags=10%, list=9%, signal=10%
GO_HYDRO_LYASE_ACTIVITY	GO_HYDRO_LYASE_ACTIVITY		42	0.5152	1.65846	0	0.178437	1	1474	tags=10%, list=7%, signal=10%
GO_LATE_ENDOSOME_MEMBRANE	GO_LATE_ENDOSOME_MEMBRANE		116	0.45587	1.65713	0	0.179075	1	854	tags=8%, list=4%, signal=8%
GO_REGULATION_OF_ERBB_SIGNALING_PATHWAY	GO_REGULATION_OF_ERBB_SIGNALING_PATHWAY		76	0.44493	1.65685	0	0.178112	1	2699	tags=13%, list=13%, signal=15%
GO_SMOOTH_MUSCLE_CELL_DIFFERENTIATION	GO_SMOOTH_MUSCLE_CELL_DIFFERENTIATION		53	0.470671	1.65595	0	0.179515	1	796	tags=9%, list=4%, signal=10%
GO_NAD_BINDING	GO_NAD_BINDING		51	0.533039	1.65589	0	0.178562	1	1060	tags=10%, list=5%, signal=10%
GO_POSITIVE_REGULATION_OF_STRESS_FIBER_ASSEMBLY	GO_POSITIVE_REGULATION_OF_STRESS_FIBER_ASSEMBLY		45	0.465579	1.65522	0	0.177965	1	1381	tags=9%, list=6%, signal=9%
GO_ANDROGEN_RECEPTOR_BINDING	GO_ANDROGEN_RECEPTOR_BINDING		42	0.37898	1.65325	0	0.179705	1	72	tags=2%, list=0%, signal=2%
GO_POSITIVE_REGULATION_OF_ACTIN_FILAMENT_BUNDLE_ASSEMBLY	GO_POSITIVE_REGULATION_OF_ACTIN_FILAMENT_BUNDLE_ASSEMBLY		54	0.428546	1.65207	0	0.18254	1	1465	tags=9%, list=7%, signal=10%
GO_REGULATION_OF_TELOMERE_MAINTENANCE	GO_REGULATION_OF_TELOMERE_MAINTENANCE		74	0.359771	1.6501	0	0.183041	1	1108	tags=3%, list=5%, signal=3%
GO_METALLOENDOPEPTIDASE_ACTIVITY	GO_METALLOENDOPEPTIDASE_ACTIVITY		84	0.621863	1.64882	0	0.182504	1	1886	tags=23%, list=9%, signal=25%
GO_REGULATION_OF_ATPASE_ACTIVITY	GO_REGULATION_OF_ATPASE_ACTIVITY		61	0.369143	1.64871	0	0.18157	1	1079	tags=5%, list=5%, signal=5%
GO_RESPONSE_TO_STARVATION	GO_RESPONSE_TO_STARVATION		169	0.341551	1.64796	0	0.181146	1	2083	tags=7%, list=10%, signal=7%
GO_PROTEIN_N_TERMINUS_BINDING	GO_PROTEIN_N_TERMINUS_BINDING		102	0.35854	1.64732	0	0.180643	1	623	tags=4%, list=3%, signal=4%
GO_T_CELL_DIFFERENTIATION_IN_THYMUS	GO_T_CELL_DIFFERENTIATION_IN_THYMUS		54	0.525324	1.64384	0	0.183496	1	2155	tags=15%, list=10%, signal=16%
GO_NEGATIVE_REGULATION_OF_UBIQUITIN_DEPENDENT_PROTEIN_CATABOLIC_PROCESS	GO_NEGATIVE_REGULATION_OF_UBIQUITIN_DEPENDENT_PROTEIN_CATABOLIC_PROCESS		43	0.45617	1.64191	0.0963115	0.184906	1	101	tags=2%, list=0%, signal=2%
GO_INTRINSIC_COMPONENT_OF_ORGANELLE_MEMBRANE	GO_INTRINSIC_COMPONENT_OF_ORGANELLE_MEMBRANE		341	0.358264	1.64119	0	0.184306	1	1016	tags=5%, list=5%, signal=5%
GO_PROTEIN_LOCALIZATION_TO_CHROMOSOME	GO_PROTEIN_LOCALIZATION_TO_CHROMOSOME		79	0.38995	1.64046	0	0.183398	1	59	tags=1%, list=0%, signal=1%
GO_FATTY_ACID_BETA_OXIDATION_USING_ACYL_COA_OXIDASE	GO_FATTY_ACID_BETA_OXIDATION_USING_ACYL_COA_OXIDASE		15	0.672732	1.63705	0	0.186243	1	4	tags=7%, list=0%, signal=7%
GO_NEGATIVE_REGULATION_OF_NUCLEOBASE_CONTAINING_COMPOUND_METABOLIC_PROCESS	GO_NEGATIVE_REGULATION_OF_NUCLEOBASE_CONTAINING_COMPOUND_METABOLIC_PROCESS		134	0.287496	1.6362	0	0.186153	1	1079	tags=3%, list=5%, signal=3%
GO_REGULATION_OF_WNT_SIGNALING_PATHWAY	GO_REGULATION_OF_WNT_SIGNALING_PATHWAY		327	0.364918	1.6353	0	0.18525	1	3168	tags=13%, list=15%, signal=15%
GO_NEGATIVE_REGULATION_OF_APOPTOTIC_SIGNALING_PATHWAY	GO_NEGATIVE_REGULATION_OF_APOPTOTIC_SIGNALING_PATHWAY		196	0.387322	1.63506	0	0.184988	1	2426	tags=10%, list=11%, signal=11%
GO_T_CELL_SELECTION	GO_T_CELL_SELECTION		34	0.682895	1.63431	0	0.185939	1	1571	tags=26%, list=7%, signal=29%
GO_REGULATION_OF_PHOSPHOPROTEIN_PHOSPHATASE_ACTIVITY	GO_REGULATION_OF_PHOSPHOPROTEIN_PHOSPHATASE_ACTIVITY		98	0.406748	1.63421	0	0.185055	1	2396	tags=10%, list=11%, signal=11%
GO_POSITIVE_REGULATION_OF_CELL_CYCLE_G1_S_PHASE_TRANSITION	GO_POSITIVE_REGULATION_OF_CELL_CYCLE_G1_S_PHASE_TRANSITION		44	0.564521	1.63343	0	0.184566	1	964	tags=11%, list=5%, signal=12%
GO_RESPONSE_TO_COLD	GO_RESPONSE_TO_COLD		44	0.444097	1.63258	0	0.184315	1	1639	tags=14%, list=8%, signal=15%
GO_CELL_CELL_SIGNALING_BY_WNT	GO_CELL_CELL_SIGNALING_BY_WNT		475	0.338223	1.63191	0	0.183458	1	3539	tags=13%, list=17%, signal=15%
GO_AMIDE_TRANSMEMBRANE_TRANSPORTER_ACTIVITY	GO_AMIDE_TRANSMEMBRANE_TRANSPORTER_ACTIVITY		37	0.546813	1.62927	0	0.18573	1	543	tags=8%, list=3%, signal=8%
GO_PEPTIDE_TRANSMEMBRANE_TRANSPORTER_ACTIVITY	GO_PEPTIDE_TRANSMEMBRANE_TRANSPORTER_ACTIVITY		27	0.599163	1.62876	0	0.185274	1	543	tags=7%, list=3%, signal=8%
GO_REGULATION_OF_ORGANELLE_ASSEMBLY	GO_REGULATION_OF_ORGANELLE_ASSEMBLY		171	0.293854	1.62759	0	0.185647	1	2083	tags=7%, list=10%, signal=8%
GO_AZUROPHIL_GRANULE	GO_AZUROPHIL_GRANULE		121	0.311724	1.62718	0	0.185345	1	205	tags=2%, list=1%, signal=2%
GO_HISTONE_KINASE_ACTIVITY	GO_HISTONE_KINASE_ACTIVITY		16	0.662668	1.62581	0	0.186135	1	72	tags=6%, list=0%, signal=6%
GO_DEOXYRIBONUCLEOTIDE_BIOSYNTHETIC_PROCESS	GO_DEOXYRIBONUCLEOTIDE_BIOSYNTHETIC_PROCESS		15	0.728784	1.62518	0	0.186449	1	12	tags=7%, list=0%, signal=7%
GO_POSITIVE_REGULATION_OF_B_CELL_PROLIFERATION	GO_POSITIVE_REGULATION_OF_B_CELL_PROLIFERATION		28	0.582181	1.62283	0	0.18781	1	1370	tags=21%, list=6%, signal=23%
GO_PEROXISOME_PROLIFERATOR_ACTIVATED_RECEPTOR_SIGNALING_PATHWAY	GO_PEROXISOME_PROLIFERATOR_ACTIVATED_RECEPTOR_SIGNALING_PATHWAY		18	0.617633	1.62207	0	0.187389	1	423	tags=11%, list=2%, signal=11%
GO_AZUROPHIL_GRANULE_LUMEN	GO_AZUROPHIL_GRANULE_LUMEN		67	0.336764	1.62191	0	0.18683	1	2325	tags=6%, list=11%, signal=7%
GO_CHONDROITIN_SULFATE_PROTEOGLYCAN_METABOLIC_PROCESS	GO_CHONDROITIN_SULFATE_PROTEOGLYCAN_METABOLIC_PROCESS		37	0.557644	1.6207	0	0.186009	1	1545	tags=22%, list=7%, signal=23%
GO_ANTIGEN_PROCESSING_AND_PRESENTATION	GO_ANTIGEN_PROCESSING_AND_PRESENTATION		189	0.436431	1.61987	0	0.185197	1	1865	tags=8%, list=9%, signal=9%
GO_CELL_DIFFERENTIATION_INVOLVED_IN_METANEPHROS_DEVELOPMENT	GO_CELL_DIFFERENTIATION_INVOLVED_IN_METANEPHROS_DEVELOPMENT		23	0.706873	1.61979	0	0.184395	1	262	tags=13%, list=1%, signal=13%
GO_SIGNAL_TRANSDUCTION_IN_RESPONSE_TO_DNA_DAMAGE	GO_SIGNAL_TRANSDUCTION_IN_RESPONSE_TO_DNA_DAMAGE		120	0.329831	1.61918	0	0.184314	1	895	tags=4%, list=4%, signal=4%
GO_RESPONSE_TO_VITAMIN_D	GO_RESPONSE_TO_VITAMIN_D		31	0.6504	1.6188	0	0.184037	1	1782	tags=26%, list=8%, signal=28%
GO_RNA_INTERFERENCE	GO_RNA_INTERFERENCE		16	0.818692	1.61857	0	0.183255	1	59	tags=6%, list=0%, signal=6%
GO_REGULATION_OF_PROTEIN_LOCALIZATION_TO_CELL_SURFACE	GO_REGULATION_OF_PROTEIN_LOCALIZATION_TO_CELL_SURFACE		34	0.452167	1.61843	0	0.182482	1	1842	tags=12%, list=9%, signal=13%
GO_ANTIGEN_PROCESSING_AND_PRESENTATION_OF_PEPTIDE_OR_POLYSACCHARIDE_ANTIGEN_VIA_MHC_CLASS_II	GO_ANTIGEN_PROCESSING_AND_PRESENTATION_OF_PEPTIDE_OR_POLYSACCHARIDE_ANTIGEN_VIA_MHC_CLASS_II		89	0.55388	1.61737	0	0.183095	1	1730	tags=9%, list=8%, signal=10%
GO_FAD_BINDING	GO_FAD_BINDING		25	0.590455	1.61622	0	0.18267	1	1853	tags=20%, list=9%, signal=22%
GO_EXOGENOUS_PROTEIN_BINDING	GO_EXOGENOUS_PROTEIN_BINDING		55	0.544624	1.616	0	0.181913	1	743	tags=11%, list=3%, signal=11%
GO_POSITIVE_REGULATION_OF_ERBB_SIGNALING_PATHWAY	GO_POSITIVE_REGULATION_OF_ERBB_SIGNALING_PATHWAY		24	0.640726	1.61545	0	0.181902	1	527	tags=13%, list=2%, signal=13%
GO_RESPONSE_TO_TEMPERATURE_STIMULUS	GO_RESPONSE_TO_TEMPERATURE_STIMULUS		203	0.392934	1.61525	0	0.181158	1	1961	tags=11%, list=9%, signal=12%
GO_POSITIVE_REGULATION_OF_I_KAPPAB_KINASE_NF_KAPPAB_SIGNALING	GO_POSITIVE_REGULATION_OF_I_KAPPAB_KINASE_NF_KAPPAB_SIGNALING		153	0.548476	1.6148	0	0.181572	1	1986	tags=14%, list=9%, signal=16%
GO_PYRIMIDINE_CONTAINING_COMPOUND_BIOSYNTHETIC_PROCESS	GO_PYRIMIDINE_CONTAINING_COMPOUND_BIOSYNTHETIC_PROCESS		53	0.428722	1.61427	0	0.18123	1	2459	tags=9%, list=12%, signal=11%
GO_REGULATION_OF_CELLULAR_RESPONSE_TO_TRANSFORMING_GROWTH_FACTOR_BETA_STIMULUS	GO_REGULATION_OF_CELLULAR_RESPONSE_TO_TRANSFORMING_GROWTH_FACTOR_BETA_STIMULUS		98	0.356908	1.6138	0	0.180893	1	180	tags=4%, list=1%, signal=4%
GO_TRANSFORMING_GROWTH_FACTOR_BETA_BINDING	GO_TRANSFORMING_GROWTH_FACTOR_BETA_BINDING		21	0.649344	1.61248	0	0.181975	1	957	tags=14%, list=4%, signal=15%
GO_BRANCHING_INVOLVED_IN_BLOOD_VESSEL_MORPHOGENESIS	GO_BRANCHING_INVOLVED_IN_BLOOD_VESSEL_MORPHOGENESIS		27	0.573337	1.6119	0	0.181638	1	1093	tags=11%, list=5%, signal=12%
GO_PLATELET_DENSE_GRANULE	GO_PLATELET_DENSE_GRANULE		15	0.643094	1.60677	0	0.186025	1	1708	tags=20%, list=8%, signal=22%
GO_NEGATIVE_REGULATION_OF_TOR_SIGNALING	GO_NEGATIVE_REGULATION_OF_TOR_SIGNALING		40	0.428296	1.60654	0	0.185286	1	27	tags=3%, list=0%, signal=2%
GO_REGULATION_OF_APOPTOTIC_SIGNALING_PATHWAY	GO_REGULATION_OF_APOPTOTIC_SIGNALING_PATHWAY		346	0.331243	1.60502	0	0.185188	1	3086	tags=11%, list=14%, signal=12%
GO_CANONICAL_WNT_SIGNALING_PATHWAY	GO_CANONICAL_WNT_SIGNALING_PATHWAY		300	0.325223	1.60368	0	0.185163	1	3247	tags=12%, list=15%, signal=14%
GO_INOSITOL_PHOSPHATE_MEDIATED_SIGNALING	GO_INOSITOL_PHOSPHATE_MEDIATED_SIGNALING		46	0.396332	1.60364	0	0.184441	1	224	tags=7%, list=1%, signal=7%
GO_UBIQUITIN_LIKE_PROTEIN_LIGASE_BINDING	GO_UBIQUITIN_LIKE_PROTEIN_LIGASE_BINDING		287	0.235836	1.60279	0	0.184058	1	746	tags=2%, list=3%, signal=2%
GO_CELLULAR_RESPONSE_TO_EXTERNAL_STIMULUS	GO_CELLULAR_RESPONSE_TO_EXTERNAL_STIMULUS		284	0.360826	1.60026	0	0.184465	1	2431	tags=12%, list=11%, signal=13%
GO_NEUTRAL_AMINO_ACID_TRANSMEMBRANE_TRANSPORTER_ACTIVITY	GO_NEUTRAL_AMINO_ACID_TRANSMEMBRANE_TRANSPORTER_ACTIVITY		23	0.573634	1.59962	0	0.184876	1	133	tags=9%, list=1%, signal=9%
GO_IMMUNOLOGICAL_SYNAPSE	GO_IMMUNOLOGICAL_SYNAPSE		26	0.742282	1.59954	0	0.184171	1	497	tags=15%, list=2%, signal=16%
GO_REGULATION_OF_CELL_SIZE	GO_REGULATION_OF_CELL_SIZE		165	0.4361	1.59932	0	0.183473	1	2303	tags=15%, list=11%, signal=16%
GO_REGULATION_OF_NUCLEOBASE_CONTAINING_COMPOUND_METABOLIC_PROCESS	GO_REGULATION_OF_NUCLEOBASE_CONTAINING_COMPOUND_METABOLIC_PROCESS		454	0.242609	1.59847	0	0.184686	1	1108	tags=3%, list=5%, signal=3%
GO_ACTIN_MONOMER_BINDING	GO_ACTIN_MONOMER_BINDING		20	0.678259	1.59834	0	0.183992	1	1383	tags=20%, list=6%, signal=21%
GO_POST_TRANSLATIONAL_PROTEIN_MODIFICATION	GO_POST_TRANSLATIONAL_PROTEIN_MODIFICATION		318	0.303226	1.59649	0	0.185867	1	4635	tags=15%, list=22%, signal=19%
GO_FATTY_ACID_BIOSYNTHETIC_PROCESS	GO_FATTY_ACID_BIOSYNTHETIC_PROCESS		114	0.464497	1.59521	0	0.187192	1	1597	tags=12%, list=7%, signal=13%
GO_SMOOTH_MUSCLE_TISSUE_DEVELOPMENT	GO_SMOOTH_MUSCLE_TISSUE_DEVELOPMENT		18	0.65894	1.59435	0	0.188386	1	139	tags=11%, list=1%, signal=11%
GO_CELLULAR_RESPONSE_TO_HEAT	GO_CELLULAR_RESPONSE_TO_HEAT		117	0.384451	1.5942	0	0.187687	1	1961	tags=9%, list=9%, signal=9%
GO_FIBROBLAST_PROLIFERATION	GO_FIBROBLAST_PROLIFERATION		73	0.448525	1.59326	0	0.188306	1	1898	tags=11%, list=9%, signal=12%
GO_L_AMINO_ACID_TRANSMEMBRANE_TRANSPORTER_ACTIVITY	GO_L_AMINO_ACID_TRANSMEMBRANE_TRANSPORTER_ACTIVITY		42	0.563523	1.59306	0	0.187615	1	1065	tags=12%, list=5%, signal=13%
GO_REGULATION_OF_RNA_METABOLIC_PROCESS	GO_REGULATION_OF_RNA_METABOLIC_PROCESS		202	0.304549	1.59155	0	0.18914	1	518	tags=2%, list=2%, signal=2%
GO_ORGANIC_ACID_TRANSMEMBRANE_TRANSPORTER_ACTIVITY	GO_ORGANIC_ACID_TRANSMEMBRANE_TRANSPORTER_ACTIVITY		106	0.440953	1.59124	0	0.188452	1	2241	tags=15%, list=11%, signal=17%
GO_NEGATIVE_REGULATION_OF_EPITHELIAL_CELL_MIGRATION	GO_NEGATIVE_REGULATION_OF_EPITHELIAL_CELL_MIGRATION		55	0.495803	1.59103	0	0.1881	1	623	tags=13%, list=3%, signal=13%
GO_NEGATIVE_REGULATION_OF_PROTEIN_BINDING	GO_NEGATIVE_REGULATION_OF_PROTEIN_BINDING		86	0.379955	1.59072	0	0.187705	1	1825	tags=8%, list=9%, signal=9%
GO_COLLAGEN_BIOSYNTHETIC_PROCESS	GO_COLLAGEN_BIOSYNTHETIC_PROCESS		38	0.64114	1.59003	0	0.187606	1	2818	tags=24%, list=13%, signal=27%
GO_RIBOSE_PHOSPHATE_BIOSYNTHETIC_PROCESS	GO_RIBOSE_PHOSPHATE_BIOSYNTHETIC_PROCESS		150	0.34671	1.5895	0	0.187718	1	1639	tags=6%, list=8%, signal=6%
GO_POST_GOLGI_VESICLE_MEDIATED_TRANSPORT	GO_POST_GOLGI_VESICLE_MEDIATED_TRANSPORT		99	0.370605	1.58806	0	0.188883	1	3464	tags=8%, list=16%, signal=10%
GO_METALLOPEPTIDASE_ACTIVITY	GO_METALLOPEPTIDASE_ACTIVITY		141	0.535432	1.58713	0	0.189279	1	1886	tags=18%, list=9%, signal=20%
GO_NUCLEOSIDE_DIPHOSPHATE_METABOLIC_PROCESS	GO_NUCLEOSIDE_DIPHOSPHATE_METABOLIC_PROCESS		28	0.531141	1.58496	0	0.190679	1	21	tags=7%, list=0%, signal=7%
GO_CELLULAR_GLUCOSE_HOMEOSTASIS	GO_CELLULAR_GLUCOSE_HOMEOSTASIS		125	0.445032	1.58469	0	0.190009	1	1959	tags=14%, list=9%, signal=15%
GO_NUCLEOBASE_CONTAINING_SMALL_MOLECULE_METABOLIC_PROCESS	GO_NUCLEOBASE_CONTAINING_SMALL_MOLECULE_METABOLIC_PROCESS		307	0.348213	1.58304	0	0.189593	1	2211	tags=10%, list=10%, signal=11%
GO_CHONDROITIN_SULFATE_PROTEOGLYCAN_BIOSYNTHETIC_PROCESS	GO_CHONDROITIN_SULFATE_PROTEOGLYCAN_BIOSYNTHETIC_PROCESS		31	0.663469	1.58071	0	0.190814	1	1545	tags=26%, list=7%, signal=28%
GO_REGULATION_OF_MONOCYTE_DIFFERENTIATION	GO_REGULATION_OF_MONOCYTE_DIFFERENTIATION		16	0.727484	1.58039	0	0.190693	1	200	tags=13%, list=1%, signal=13%
GO_MISFOLDED_PROTEIN_BINDING	GO_MISFOLDED_PROTEIN_BINDING		20	0.463816	1.5792	0	0.190851	1	312	tags=10%, list=1%, signal=10%
GO_POSITIVE_REGULATION_OF_TELOMERE_CAPPING	GO_POSITIVE_REGULATION_OF_TELOMERE_CAPPING		17	0.711281	1.57862	0	0.190196	1	1108	tags=12%, list=5%, signal=12%
GO_PROTEIN_LOCALIZATION_TO_NUCLEUS	GO_PROTEIN_LOCALIZATION_TO_NUCLEUS		227	0.295787	1.57615	0	0.1954	1	1803	tags=5%, list=8%, signal=5%
GO_RESPONSE_TO_ACIDIC_PH	GO_RESPONSE_TO_ACIDIC_PH		15	0.698951	1.57598	0	0.19473	1	150	tags=20%, list=1%, signal=20%
GO_AGING	GO_AGING		259	0.331471	1.57472	0	0.195038	1	1034	tags=6%, list=5%, signal=6%
GO_POSITIVE_REGULATION_OF_CELLULAR_AMIDE_METABOLIC_PROCESS	GO_POSITIVE_REGULATION_OF_CELLULAR_AMIDE_METABOLIC_PROCESS		131	0.403926	1.57401	0	0.194774	1	89	tags=2%, list=0%, signal=2%
GO_AXONAL_TRANSPORT	GO_AXONAL_TRANSPORT		54	0.318777	1.57345	0	0.194637	1	2303	tags=9%, list=11%, signal=10%
GO_CELLULAR_RESPONSE_TO_CARBOHYDRATE_STIMULUS	GO_CELLULAR_RESPONSE_TO_CARBOHYDRATE_STIMULUS		120	0.405088	1.57175	0	0.195457	1	1392	tags=10%, list=7%, signal=11%
GO_PROTEIN_MATURATION	GO_PROTEIN_MATURATION		219	0.395654	1.56854	0	0.198318	1	3250	tags=15%, list=15%, signal=17%
GO_HOMEOSTASIS_OF_NUMBER_OF_CELLS	GO_HOMEOSTASIS_OF_NUMBER_OF_CELLS		203	0.391429	1.56851	0	0.198045	1	3588	tags=15%, list=17%, signal=18%
GO_MESENCHYMAL_TO_EPITHELIAL_TRANSITION	GO_MESENCHYMAL_TO_EPITHELIAL_TRANSITION		19	0.775417	1.56729	0	0.198446	1	435	tags=21%, list=2%, signal=21%
GO_REGULATION_OF_BMP_SIGNALING_PATHWAY	GO_REGULATION_OF_BMP_SIGNALING_PATHWAY		66	0.433274	1.56613	0	0.198457	1	412	tags=8%, list=2%, signal=8%
GO_CORECEPTOR_ACTIVITY	GO_CORECEPTOR_ACTIVITY		30	0.521163	1.56609	0	0.1978	1	1007	tags=17%, list=5%, signal=17%
GO_POSITIVE_REGULATION_OF_ANTIGEN_RECEPTOR_MEDIATED_SIGNALING_PATHWAY	GO_POSITIVE_REGULATION_OF_ANTIGEN_RECEPTOR_MEDIATED_SIGNALING_PATHWAY		17	0.734863	1.56533	0	0.197942	1	205	tags=12%, list=1%, signal=12%
GO_PROTEIN_TRIMERIZATION	GO_PROTEIN_TRIMERIZATION		41	0.552554	1.56507	0	0.197293	1	2300	tags=20%, list=11%, signal=22%
GO_GABA_RECEPTOR_BINDING	GO_GABA_RECEPTOR_BINDING		15	0.678599	1.56368	0	0.198075	1	332	tags=13%, list=2%, signal=14%
GO_OXIDOREDUCTASE_ACTIVITY_ACTING_ON_NAD_P_H	GO_OXIDOREDUCTASE_ACTIVITY_ACTING_ON_NAD_P_H		88	0.387879	1.56336	0	0.197431	1	772	tags=6%, list=4%, signal=6%
GO_DNA_POLYMERASE_COMPLEX	GO_DNA_POLYMERASE_COMPLEX		16	0.554274	1.56221	0	0.197555	1	59	tags=6%, list=0%, signal=6%
GO_REGULATION_OF_CELL_MATRIX_ADHESION	GO_REGULATION_OF_CELL_MATRIX_ADHESION		96	0.331018	1.56101	0	0.199082	1	2964	tags=11%, list=14%, signal=13%
GO_REGULATION_OF_CELLULAR_RESPONSE_TO_GROWTH_FACTOR_STIMULUS	GO_REGULATION_OF_CELLULAR_RESPONSE_TO_GROWTH_FACTOR_STIMULUS		225	0.416127	1.56091	0	0.198442	1	736	tags=9%, list=3%, signal=10%
GO_REGULATION_OF_SPINDLE_ORGANIZATION	GO_REGULATION_OF_SPINDLE_ORGANIZATION		40	0.383404	1.56091	0	0.197807	1	1108	tags=5%, list=5%, signal=5%
GO_CELLULAR_METABOLIC_COMPOUND_SALVAGE	GO_CELLULAR_METABOLIC_COMPOUND_SALVAGE		30	0.570219	1.56055	0	0.197648	1	447	tags=7%, list=2%, signal=7%
GO_DRUG_TRANSMEMBRANE_TRANSPORTER_ACTIVITY	GO_DRUG_TRANSMEMBRANE_TRANSPORTER_ACTIVITY		76	0.438028	1.56042	0	0.197778	1	3037	tags=16%, list=14%, signal=18%
GO_NEGATIVE_REGULATION_OF_PROTEASOMAL_UBIQUITIN_DEPENDENT_PROTEIN_CATABOLIC_PROCESS	GO_NEGATIVE_REGULATION_OF_PROTEASOMAL_UBIQUITIN_DEPENDENT_PROTEIN_CATABOLIC_PROCESS		31	0.498837	1.55975	0.0963115	0.197154	1	101	tags=3%, list=0%, signal=3%
GO_I_KAPPAB_KINASE_NF_KAPPAB_SIGNALING	GO_I_KAPPAB_KINASE_NF_KAPPAB_SIGNALING		215	0.462911	1.55916	0	0.197033	1	1986	tags=12%, list=9%, signal=13%
GO_MONOSACCHARIDE_METABOLIC_PROCESS	GO_MONOSACCHARIDE_METABOLIC_PROCESS		131	0.384525	1.55914	0	0.196712	1	3623	tags=17%, list=17%, signal=20%
GO_PROTEIN_FOLDING_CHAPERONE	GO_PROTEIN_FOLDING_CHAPERONE		18	0.62061	1.55793	0	0.197731	1	312	tags=17%, list=1%, signal=17%
GO_STRIATUM_DEVELOPMENT	GO_STRIATUM_DEVELOPMENT		18	0.583358	1.55762	0	0.197409	1	66	tags=11%, list=0%, signal=11%
GO_POSITIVE_REGULATION_OF_ADHERENS_JUNCTION_ORGANIZATION	GO_POSITIVE_REGULATION_OF_ADHERENS_JUNCTION_ORGANIZATION		27	0.550004	1.5556	0	0.198865	1	1147	tags=11%, list=5%, signal=12%
GO_POSITIVE_REGULATION_OF_G1_S_TRANSITION_OF_MITOTIC_CELL_CYCLE	GO_POSITIVE_REGULATION_OF_G1_S_TRANSITION_OF_MITOTIC_CELL_CYCLE		35	0.581576	1.5555	0	0.198252	1	2018	tags=14%, list=9%, signal=16%
GO_NUCLEOBASE_CONTAINING_SMALL_MOLECULE_INTERCONVERSION	GO_NUCLEOBASE_CONTAINING_SMALL_MOLECULE_INTERCONVERSION		29	0.493951	1.55529	0	0.1979	1	2459	tags=14%, list=12%, signal=16%
GO_DICARBOXYLIC_ACID_TRANSMEMBRANE_TRANSPORTER_ACTIVITY	GO_DICARBOXYLIC_ACID_TRANSMEMBRANE_TRANSPORTER_ACTIVITY		29	0.686345	1.5547	0	0.197986	1	2192	tags=24%, list=10%, signal=27%
GO_PROTEIN_IMPORT	GO_PROTEIN_IMPORT		167	0.342818	1.55333	0	0.19816	1	1803	tags=6%, list=8%, signal=6%
GO_METANEPHROS_DEVELOPMENT	GO_METANEPHROS_DEVELOPMENT		80	0.44124	1.5516	0	0.198904	1	1281	tags=15%, list=6%, signal=16%
GO_NUCLEOSIDE_TRIPHOSPHATE_BIOSYNTHETIC_PROCESS	GO_NUCLEOSIDE_TRIPHOSPHATE_BIOSYNTHETIC_PROCESS		51	0.411773	1.5513	0	0.198797	1	2459	tags=12%, list=12%, signal=13%
GO_SYNAPTIC_VESICLE_MEMBRANE	GO_SYNAPTIC_VESICLE_MEMBRANE		93	0.455458	1.55043	0	0.198669	1	1116	tags=16%, list=5%, signal=17%
GO_ASPARTIC_TYPE_PEPTIDASE_ACTIVITY	GO_ASPARTIC_TYPE_PEPTIDASE_ACTIVITY		15	0.737673	1.54996	0	0.198356	1	1125	tags=20%, list=5%, signal=21%
GO_EPIDERMAL_GROWTH_FACTOR_RECEPTOR_SIGNALING_PATHWAY	GO_EPIDERMAL_GROWTH_FACTOR_RECEPTOR_SIGNALING_PATHWAY		102	0.388465	1.547	0	0.201389	1	2767	tags=14%, list=13%, signal=16%
GO_ADRENAL_GLAND_DEVELOPMENT	GO_ADRENAL_GLAND_DEVELOPMENT		20	0.662028	1.547	0	0.200788	1	1381	tags=20%, list=6%, signal=21%
GO_POSITIVE_REGULATION_OF_ORGANELLE_ASSEMBLY	GO_POSITIVE_REGULATION_OF_ORGANELLE_ASSEMBLY		61	0.368261	1.54698	0	0.200191	1	2564	tags=8%, list=12%, signal=9%
GO_POSITIVE_T_CELL_SELECTION	GO_POSITIVE_T_CELL_SELECTION		23	0.607872	1.54527	0	0.200464	1	2155	tags=26%, list=10%, signal=29%
GO_ORGANIC_ACID_TRANSMEMBRANE_TRANSPORT	GO_ORGANIC_ACID_TRANSMEMBRANE_TRANSPORT		109	0.362397	1.54519	0	0.199873	1	2241	tags=12%, list=11%, signal=13%
GO_TRANSFERASE_ACTIVITY_TRANSFERRING_GLYCOSYL_GROUPS	GO_TRANSFERASE_ACTIVITY_TRANSFERRING_GLYCOSYL_GROUPS		225	0.341689	1.54501	0	0.199727	1	4432	tags=19%, list=21%, signal=23%
GO_POSITIVE_REGULATION_OF_DNA_BIOSYNTHETIC_PROCESS	GO_POSITIVE_REGULATION_OF_DNA_BIOSYNTHETIC_PROCESS		64	0.472423	1.54459	0	0.199143	1	3247	tags=13%, list=15%, signal=15%
GO_SPINDLE_ASSEMBLY	GO_SPINDLE_ASSEMBLY		95	0.253745	1.54427	0	0.198564	1	3138	tags=6%, list=15%, signal=7%
GO_ERBB_SIGNALING_PATHWAY	GO_ERBB_SIGNALING_PATHWAY		123	0.374165	1.54303	0	0.199849	1	2767	tags=13%, list=13%, signal=15%
GO_PROTEIN_PROCESSING	GO_PROTEIN_PROCESSING		159	0.42582	1.54233	0	0.199681	1	3204	tags=17%, list=15%, signal=20%
GO_IMMUNOGLOBULIN_SECRETION	GO_IMMUNOGLOBULIN_SECRETION		15	0.633806	1.5417	0	0.19938	1	559	tags=13%, list=3%, signal=14%
GO_PROTEIN_IMPORT_INTO_MITOCHONDRIAL_MATRIX	GO_PROTEIN_IMPORT_INTO_MITOCHONDRIAL_MATRIX		18	0.70333	1.54123	0	0.199341	1	1079	tags=11%, list=5%, signal=12%
GO_ORGANIC_ACID_BIOSYNTHETIC_PROCESS	GO_ORGANIC_ACID_BIOSYNTHETIC_PROCESS		228	0.384266	1.54116	0	0.198772	1	1597	tags=9%, list=7%, signal=9%
GO_MEMBRANE_PROTEIN_ECTODOMAIN_PROTEOLYSIS	GO_MEMBRANE_PROTEIN_ECTODOMAIN_PROTEOLYSIS		38	0.533227	1.54091	0.173333	0.198474	1	2059	tags=13%, list=10%, signal=15%
GO_CHOLESTEROL_STORAGE	GO_CHOLESTEROL_STORAGE		16	0.747818	1.5402	0	0.198603	1	957	tags=19%, list=4%, signal=20%
GO_POLARIZED_EPITHELIAL_CELL_DIFFERENTIATION	GO_POLARIZED_EPITHELIAL_CELL_DIFFERENTIATION		18	0.58909	1.53976	0	0.19832	1	271	tags=11%, list=1%, signal=11%
GO_FRIZZLED_BINDING	GO_FRIZZLED_BINDING		36	0.480837	1.53832	0	0.198452	1	575	tags=11%, list=3%, signal=11%
GO_PROTEIN_PHOSPHATASE_BINDING	GO_PROTEIN_PHOSPHATASE_BINDING		125	0.439479	1.53794	0	0.198795	1	1895	tags=8%, list=9%, signal=9%
GO_CELLULAR_RESPONSE_TO_VITAMIN_D	GO_CELLULAR_RESPONSE_TO_VITAMIN_D		19	0.596546	1.53784	0	0.198725	1	799	tags=16%, list=4%, signal=16%
GO_CELL_MIGRATION_INVOLVED_IN_HEART_DEVELOPMENT	GO_CELL_MIGRATION_INVOLVED_IN_HEART_DEVELOPMENT		16	0.581174	1.53695	0	0.199367	1	1782	tags=19%, list=8%, signal=20%
GO_RESPONSE_TO_OXYGEN_LEVELS	GO_RESPONSE_TO_OXYGEN_LEVELS		344	0.328376	1.53682	0	0.198815	1	1952	tags=9%, list=9%, signal=10%
GO_MACROMOLECULE_TRANSMEMBRANE_TRANSPORTER_ACTIVITY	GO_MACROMOLECULE_TRANSMEMBRANE_TRANSPORTER_ACTIVITY		20	0.488114	1.53629	0	0.19934	1	40	tags=5%, list=0%, signal=5%
GO_HEPARAN_SULFATE_PROTEOGLYCAN_METABOLIC_PROCESS	GO_HEPARAN_SULFATE_PROTEOGLYCAN_METABOLIC_PROCESS		34	0.644395	1.5361	0	0.198792	1	3476	tags=26%, list=16%, signal=32%
GO_GLYCEROLIPID_BIOSYNTHETIC_PROCESS	GO_GLYCEROLIPID_BIOSYNTHETIC_PROCESS		198	0.317254	1.5353	0	0.198506	1	3398	tags=11%, list=16%, signal=12%
GO_METANEPHRIC_EPITHELIUM_DEVELOPMENT	GO_METANEPHRIC_EPITHELIUM_DEVELOPMENT		21	0.573121	1.53512	0	0.197964	1	1168	tags=19%, list=5%, signal=20%
GO_COFACTOR_BIOSYNTHETIC_PROCESS	GO_COFACTOR_BIOSYNTHETIC_PROCESS		192	0.314041	1.53449	0	0.197939	1	1639	tags=7%, list=8%, signal=7%
GO_CELL_PROLIFERATION_INVOLVED_IN_KIDNEY_DEVELOPMENT	GO_CELL_PROLIFERATION_INVOLVED_IN_KIDNEY_DEVELOPMENT		20	0.620819	1.53436	0	0.197403	1	1782	tags=20%, list=8%, signal=22%
GO_EXTRACELLULAR_MATRIX_STRUCTURAL_CONSTITUENT	GO_EXTRACELLULAR_MATRIX_STRUCTURAL_CONSTITUENT		125	0.534002	1.53373	0	0.197477	1	1962	tags=24%, list=9%, signal=26%
GO_PROTEASE_BINDING	GO_PROTEASE_BINDING		100	0.390605	1.53229	0	0.198722	1	2904	tags=14%, list=14%, signal=16%
GO_PML_BODY	GO_PML_BODY		95	0.375596	1.5321	0	0.198604	1	1025	tags=4%, list=5%, signal=4%
GO_AMINO_ACID_TRANSMEMBRANE_TRANSPORT	GO_AMINO_ACID_TRANSMEMBRANE_TRANSPORT		67	0.467932	1.53185	0	0.198242	1	2198	tags=16%, list=10%, signal=18%
GO_ANTIGEN_PROCESSING_AND_PRESENTATION_OF_PEPTIDE_ANTIGEN	GO_ANTIGEN_PROCESSING_AND_PRESENTATION_OF_PEPTIDE_ANTIGEN		165	0.412872	1.53115	0	0.198186	1	1865	tags=7%, list=9%, signal=8%
GO_MONOCARBOXYLIC_ACID_BIOSYNTHETIC_PROCESS	GO_MONOCARBOXYLIC_ACID_BIOSYNTHETIC_PROCESS		147	0.424265	1.53059	0	0.198659	1	1597	tags=11%, list=7%, signal=12%
GO_OXIDOREDUCTASE_ACTIVITY_ACTING_ON_THE_ALDEHYDE_OR_OXO_GROUP_OF_DONORS	GO_OXIDOREDUCTASE_ACTIVITY_ACTING_ON_THE_ALDEHYDE_OR_OXO_GROUP_OF_DONORS		37	0.604208	1.53027	0	0.198318	1	2414	tags=22%, list=11%, signal=24%
GO_ESTABLISHMENT_OF_ENDOTHELIAL_BARRIER	GO_ESTABLISHMENT_OF_ENDOTHELIAL_BARRIER		36	0.551202	1.5301	0	0.198227	1	575	tags=8%, list=3%, signal=9%
GO_PROTEIN_TRANSPORTER_ACTIVITY	GO_PROTEIN_TRANSPORTER_ACTIVITY		83	0.326356	1.52936	0	0.197954	1	1007	tags=2%, list=5%, signal=3%
GO_FATTY_ACID_BINDING	GO_FATTY_ACID_BINDING		24	0.642066	1.52883	0	0.198148	1	690	tags=13%, list=3%, signal=13%
GO_REGULATION_OF_DEPHOSPHORYLATION	GO_REGULATION_OF_DEPHOSPHORYLATION		176	0.299139	1.52828	0	0.199008	1	2551	tags=8%, list=12%, signal=9%
GO_LYMPHOCYTE_HOMEOSTASIS	GO_LYMPHOCYTE_HOMEOSTASIS		46	0.563884	1.52783	0	0.19895	1	5254	tags=39%, list=25%, signal=52%
GO_INSULIN_RECEPTOR_SIGNALING_PATHWAY	GO_INSULIN_RECEPTOR_SIGNALING_PATHWAY		121	0.515528	1.52704	0	0.199341	1	3668	tags=19%, list=17%, signal=23%
GO_REGULATION_OF_SUPRAMOLECULAR_FIBER_ORGANIZATION	GO_REGULATION_OF_SUPRAMOLECULAR_FIBER_ORGANIZATION		303	0.336507	1.52699	0	0.198826	1	2339	tags=10%, list=11%, signal=11%
GO_AXON_CYTOPLASM	GO_AXON_CYTOPLASM		55	0.305167	1.5267	0	0.198799	1	304	tags=4%, list=1%, signal=4%
GO_PROTEIN_KINASE_C_ACTIVITY	GO_PROTEIN_KINASE_C_ACTIVITY		15	0.669816	1.52669	0	0.19829	1	1209	tags=20%, list=6%, signal=21%
GO_WNT_PROTEIN_BINDING	GO_WNT_PROTEIN_BINDING		33	0.540363	1.52571	0	0.199839	1	1815	tags=15%, list=9%, signal=17%
GO_PYRIMIDINE_RIBONUCLEOTIDE_BIOSYNTHETIC_PROCESS	GO_PYRIMIDINE_RIBONUCLEOTIDE_BIOSYNTHETIC_PROCESS		20	0.577422	1.52482	0	0.199899	1	2164	tags=15%, list=10%, signal=17%
GO_POSITIVE_REGULATION_OF_COLD_INDUCED_THERMOGENESIS	GO_POSITIVE_REGULATION_OF_COLD_INDUCED_THERMOGENESIS		75	0.424904	1.52429	0	0.200166	1	1817	tags=15%, list=9%, signal=16%
GO_DNA_BIOSYNTHETIC_PROCESS	GO_DNA_BIOSYNTHETIC_PROCESS		174	0.291434	1.52349	0	0.200521	1	2995	tags=7%, list=14%, signal=9%
GO_DOUBLE_STRANDED_RNA_BINDING	GO_DOUBLE_STRANDED_RNA_BINDING		66	0.483123	1.523	0	0.200252	1	1006	tags=6%, list=5%, signal=6%
GO_ADAPTIVE_THERMOGENESIS	GO_ADAPTIVE_THERMOGENESIS		127	0.367586	1.52283	0	0.200127	1	1961	tags=13%, list=9%, signal=15%
GO_UDP_GLYCOSYLTRANSFERASE_ACTIVITY	GO_UDP_GLYCOSYLTRANSFERASE_ACTIVITY		114	0.468107	1.52164	0	0.201234	1	2018	tags=13%, list=9%, signal=14%
GO_CELLULAR_RESPONSE_TO_VITAMIN	GO_CELLULAR_RESPONSE_TO_VITAMIN		26	0.491565	1.52097	0	0.201474	1	799	tags=12%, list=4%, signal=12%
GO_STEROID_CATABOLIC_PROCESS	GO_STEROID_CATABOLIC_PROCESS		21	0.636162	1.52035	0	0.200971	1	153	tags=14%, list=1%, signal=14%
GO_PROTEIN_HETEROOLIGOMERIZATION	GO_PROTEIN_HETEROOLIGOMERIZATION		110	0.339101	1.52018	0	0.200471	1	1069	tags=5%, list=5%, signal=5%
GO_PHOSPHATASE_REGULATOR_ACTIVITY	GO_PHOSPHATASE_REGULATOR_ACTIVITY		86	0.461256	1.51911	0	0.201048	1	1766	tags=10%, list=8%, signal=11%
GO_REGULATION_OF_CELL_CYCLE_G1_S_PHASE_TRANSITION	GO_REGULATION_OF_CELL_CYCLE_G1_S_PHASE_TRANSITION		152	0.339527	1.51901	0	0.200551	1	1323	tags=7%, list=6%, signal=7%
GO_GLYCOSYL_COMPOUND_METABOLIC_PROCESS	GO_GLYCOSYL_COMPOUND_METABOLIC_PROCESS		54	0.483372	1.51892	0	0.200252	1	3654	tags=19%, list=17%, signal=22%
GO_NEUROTRANSMITTER_BINDING	GO_NEUROTRANSMITTER_BINDING		36	0.655399	1.51846	0	0.200584	1	2262	tags=31%, list=11%, signal=34%
GO_PHOSPHATASE_BINDING	GO_PHOSPHATASE_BINDING		165	0.357074	1.51846	0	0.200093	1	3634	tags=12%, list=17%, signal=14%
GO_POSITIVE_REGULATION_OF_CYCLIN_DEPENDENT_PROTEIN_KINASE_ACTIVITY	GO_POSITIVE_REGULATION_OF_CYCLIN_DEPENDENT_PROTEIN_KINASE_ACTIVITY		34	0.558682	1.51835	0.0754352	0.199605	1	495	tags=9%, list=2%, signal=9%
GO_INTRINSIC_COMPONENT_OF_SYNAPTIC_VESICLE_MEMBRANE	GO_INTRINSIC_COMPONENT_OF_SYNAPTIC_VESICLE_MEMBRANE		41	0.518905	1.51833	0	0.199121	1	599	tags=17%, list=3%, signal=18%
GO_REGULATION_OF_KIDNEY_DEVELOPMENT	GO_REGULATION_OF_KIDNEY_DEVELOPMENT		50	0.503765	1.51765	0	0.19902	1	1281	tags=14%, list=6%, signal=15%
GO_RIBONUCLEOPROTEIN_COMPLEX_BINDING	GO_RIBONUCLEOPROTEIN_COMPLEX_BINDING		126	0.287584	1.51702	0	0.199172	1	801	tags=2%, list=4%, signal=2%
GO_RESPONSE_TO_TESTOSTERONE	GO_RESPONSE_TO_TESTOSTERONE		38	0.481735	1.51699	0	0.198693	1	116	tags=5%, list=1%, signal=5%
GO_PRI_MIRNA_TRANSCRIPTION_BY_RNA_POLYMERASE_II	GO_PRI_MIRNA_TRANSCRIPTION_BY_RNA_POLYMERASE_II		41	0.654658	1.51686	0	0.198218	1	1664	tags=17%, list=8%, signal=18%
GO_POSITIVE_REGULATION_OF_PROTEIN_COMPLEX_DISASSEMBLY	GO_POSITIVE_REGULATION_OF_PROTEIN_COMPLEX_DISASSEMBLY		33	0.640652	1.51613	0	0.198238	1	2269	tags=18%, list=11%, signal=20%
GO_ADHERENS_JUNCTION_ASSEMBLY	GO_ADHERENS_JUNCTION_ASSEMBLY		82	0.308948	1.5158	0	0.198682	1	3486	tags=12%, list=16%, signal=15%
GO_COENZYME_BINDING	GO_COENZYME_BINDING		246	0.346614	1.51277	0	0.202824	1	1230	tags=7%, list=6%, signal=7%
GO_REGULATION_OF_TELOMERASE_ACTIVITY	GO_REGULATION_OF_TELOMERASE_ACTIVITY		46	0.504878	1.51199	0	0.203358	1	3625	tags=13%, list=17%, signal=16%
GO_POSITIVE_REGULATION_OF_CYTOSKELETON_ORGANIZATION	GO_POSITIVE_REGULATION_OF_CYTOSKELETON_ORGANIZATION		200	0.355921	1.51161	0	0.203621	1	1526	tags=9%, list=7%, signal=9%
GO_CARDIAC_EPITHELIAL_TO_MESENCHYMAL_TRANSITION	GO_CARDIAC_EPITHELIAL_TO_MESENCHYMAL_TRANSITION		30	0.556181	1.51161	0	0.203139	1	895	tags=13%, list=4%, signal=14%
GO_NEGATIVE_REGULATION_OF_PROTEOLYSIS	GO_NEGATIVE_REGULATION_OF_PROTEOLYSIS		236	0.365827	1.51074	0	0.20363	1	2594	tags=13%, list=12%, signal=14%
GO_REGULATION_OF_CELL_SUBSTRATE_ADHESION	GO_REGULATION_OF_CELL_SUBSTRATE_ADHESION		173	0.419036	1.51011	0	0.204434	1	2995	tags=17%, list=14%, signal=20%
GO_ALCOHOL_DEHYDROGENASE_NADPPLUS_ACTIVITY	GO_ALCOHOL_DEHYDROGENASE_NADPPLUS_ACTIVITY		15	0.64865	1.50955	0	0.20437	1	772	tags=13%, list=4%, signal=14%
GO_REGULATION_OF_VIRAL_LIFE_CYCLE	GO_REGULATION_OF_VIRAL_LIFE_CYCLE		116	0.420029	1.50906	0	0.204685	1	3685	tags=13%, list=17%, signal=16%
GO_REGULATION_OF_CELLULAR_RESPONSE_TO_INSULIN_STIMULUS	GO_REGULATION_OF_CELLULAR_RESPONSE_TO_INSULIN_STIMULUS		57	0.624948	1.50837	0	0.205272	1	2817	tags=19%, list=13%, signal=22%
GO_ZINC_ION_TRANSPORT	GO_ZINC_ION_TRANSPORT		24	0.523985	1.5083	0	0.204794	1	2402	tags=17%, list=11%, signal=19%
GO_INNERVATION	GO_INNERVATION		25	0.502433	1.50794	0	0.204687	1	1281	tags=24%, list=6%, signal=26%
GO_POSITIVE_REGULATION_OF_LIPID_KINASE_ACTIVITY	GO_POSITIVE_REGULATION_OF_LIPID_KINASE_ACTIVITY		27	0.458609	1.50692	0	0.205965	1	858	tags=15%, list=4%, signal=15%
GO_REGULATION_OF_COLLAGEN_BIOSYNTHETIC_PROCESS	GO_REGULATION_OF_COLLAGEN_BIOSYNTHETIC_PROCESS		30	0.704081	1.50682	0	0.205489	1	2818	tags=27%, list=13%, signal=31%
GO_KIDNEY_MESENCHYME_DEVELOPMENT	GO_KIDNEY_MESENCHYME_DEVELOPMENT		19	0.733483	1.50663	0	0.205159	1	435	tags=16%, list=2%, signal=16%
GO_HISTONE_BINDING	GO_HISTONE_BINDING		180	0.269577	1.50538	0	0.20603	1	683	tags=3%, list=3%, signal=3%
GO_EXTRACELLULAR_MATRIX_STRUCTURAL_CONSTITUENT_CONFERRING_TENSILE_STRENGTH	GO_EXTRACELLULAR_MATRIX_STRUCTURAL_CONSTITUENT_CONFERRING_TENSILE_STRENGTH		34	0.725867	1.50535	0	0.205558	1	1680	tags=29%, list=8%, signal=32%
GO_BILE_ACID_METABOLIC_PROCESS	GO_BILE_ACID_METABOLIC_PROCESS		34	0.475298	1.50514	0	0.205353	1	4	tags=6%, list=0%, signal=6%
GO_T_HELPER_17_TYPE_IMMUNE_RESPONSE	GO_T_HELPER_17_TYPE_IMMUNE_RESPONSE		19	0.639781	1.50503	0	0.205365	1	1572	tags=26%, list=7%, signal=28%
GO_AMINO_SUGAR_METABOLIC_PROCESS	GO_AMINO_SUGAR_METABOLIC_PROCESS		20	0.626721	1.50489	0.102823	0.2049	1	61	tags=10%, list=0%, signal=10%
GO_MULTI_MULTICELLULAR_ORGANISM_PROCESS	GO_MULTI_MULTICELLULAR_ORGANISM_PROCESS		166	0.437611	1.50408	0	0.205707	1	2140	tags=16%, list=10%, signal=18%
GO_REGULATION_OF_SIGNAL_TRANSDUCTION_BY_P53_CLASS_MEDIATOR	GO_REGULATION_OF_SIGNAL_TRANSDUCTION_BY_P53_CLASS_MEDIATOR		170	0.198815	1.50403	0	0.205243	1	895	tags=2%, list=4%, signal=2%
GO_RAC_PROTEIN_SIGNAL_TRANSDUCTION	GO_RAC_PROTEIN_SIGNAL_TRANSDUCTION		32	0.550777	1.50402	0.0846774	0.204782	1	2354	tags=13%, list=11%, signal=14%
GO_NEGATIVE_REGULATION_OF_RESPONSE_TO_WOUNDING	GO_NEGATIVE_REGULATION_OF_RESPONSE_TO_WOUNDING		63	0.466533	1.5035	0	0.204722	1	2818	tags=22%, list=13%, signal=26%
GO_POSITIVE_REGULATION_OF_MONOOXYGENASE_ACTIVITY	GO_POSITIVE_REGULATION_OF_MONOOXYGENASE_ACTIVITY		22	0.621509	1.50241	0	0.205269	1	204	tags=9%, list=1%, signal=9%
GO_T_CELL_PROLIFERATION	GO_T_CELL_PROLIFERATION		124	0.537811	1.50241	0	0.204812	1	1723	tags=19%, list=8%, signal=20%
GO_NEGATIVE_REGULATION_OF_INTRINSIC_APOPTOTIC_SIGNALING_PATHWAY_BY_P53_CLASS_MEDIATOR	GO_NEGATIVE_REGULATION_OF_INTRINSIC_APOPTOTIC_SIGNALING_PATHWAY_BY_P53_CLASS_MEDIATOR		19	0.63075	1.50133	0	0.206356	1	4509	tags=26%, list=21%, signal=33%
GO_RESPONSE_TO_PH	GO_RESPONSE_TO_PH		28	0.578117	1.50071	0	0.206224	1	2018	tags=25%, list=9%, signal=28%
GO_REGULATION_OF_B_CELL_PROLIFERATION	GO_REGULATION_OF_B_CELL_PROLIFERATION		39	0.499631	1.50058	0	0.206135	1	1370	tags=15%, list=6%, signal=16%
GO_POSITIVE_REGULATION_OF_LEUKOCYTE_MIGRATION	GO_POSITIVE_REGULATION_OF_LEUKOCYTE_MIGRATION		80	0.551659	1.50049	0	0.205681	1	2705	tags=28%, list=13%, signal=31%
GO_ZINC_ION_TRANSMEMBRANE_TRANSPORTER_ACTIVITY	GO_ZINC_ION_TRANSMEMBRANE_TRANSPORTER_ACTIVITY		17	0.606557	1.50038	0	0.205618	1	1516	tags=18%, list=7%, signal=19%
GO_POSITIVE_REGULATION_OF_MAP_KINASE_ACTIVITY	GO_POSITIVE_REGULATION_OF_MAP_KINASE_ACTIVITY		226	0.370444	1.49982	0	0.205168	1	2711	tags=16%, list=13%, signal=18%
GO_REGULATION_OF_CELLULAR_COMPONENT_SIZE	GO_REGULATION_OF_CELLULAR_COMPONENT_SIZE		336	0.367922	1.49951	0	0.205286	1	2339	tags=13%, list=11%, signal=14%
GO_MULTIVESICULAR_BODY	GO_MULTIVESICULAR_BODY		33	0.469502	1.49935	0	0.205174	1	700	tags=12%, list=3%, signal=13%
GO_CARBOHYDRATE_DERIVATIVE_CATABOLIC_PROCESS	GO_CARBOHYDRATE_DERIVATIVE_CATABOLIC_PROCESS		149	0.382647	1.49924	0	0.204729	1	1545	tags=12%, list=7%, signal=13%
GO_GLYCOPROTEIN_METABOLIC_PROCESS	GO_GLYCOPROTEIN_METABOLIC_PROCESS		120	0.449397	1.49919	0	0.204286	1	2063	tags=13%, list=10%, signal=14%
GO_OSSIFICATION	GO_OSSIFICATION		321	0.391094	1.49896	0	0.203846	1	1980	tags=12%, list=9%, signal=13%
GO_PROTEIN_CONTAINING_COMPLEX_DISASSEMBLY	GO_PROTEIN_CONTAINING_COMPLEX_DISASSEMBLY		307	0.271224	1.49851	0	0.203789	1	1465	tags=4%, list=7%, signal=4%
GO_INOSITOL_PHOSPHATE_METABOLIC_PROCESS	GO_INOSITOL_PHOSPHATE_METABOLIC_PROCESS		43	0.472252	1.4983	0	0.203353	1	3288	tags=14%, list=15%, signal=16%
GO_POSITIVE_REGULATION_OF_LEUKOCYTE_PROLIFERATION	GO_POSITIVE_REGULATION_OF_LEUKOCYTE_PROLIFERATION		90	0.510718	1.49809	0	0.202919	1	1723	tags=20%, list=8%, signal=22%
GO_PROTEIN_COMPLEX_OLIGOMERIZATION	GO_PROTEIN_COMPLEX_OLIGOMERIZATION		468	0.374638	1.49796	0	0.202664	1	2110	tags=11%, list=10%, signal=12%
GO_MICROTUBULE_DEPOLYMERIZATION	GO_MICROTUBULE_DEPOLYMERIZATION		39	0.470303	1.49749	0	0.202564	1	911	tags=10%, list=4%, signal=11%
GO_NEUROMUSCULAR_PROCESS_CONTROLLING_BALANCE	GO_NEUROMUSCULAR_PROCESS_CONTROLLING_BALANCE		41	0.445864	1.49745	0	0.202283	1	1288	tags=12%, list=6%, signal=13%
GO_POSITIVE_REGULATION_OF_TELOMERASE_ACTIVITY	GO_POSITIVE_REGULATION_OF_TELOMERASE_ACTIVITY		35	0.583832	1.49736	0	0.202025	1	3247	tags=11%, list=15%, signal=13%
GO_REGULATION_OF_PHOSPHATASE_ACTIVITY	GO_REGULATION_OF_PHOSPHATASE_ACTIVITY		146	0.328889	1.49725	0	0.201601	1	1766	tags=7%, list=8%, signal=7%
GO_POSITIVE_REGULATION_OF_FAT_CELL_DIFFERENTIATION	GO_POSITIVE_REGULATION_OF_FAT_CELL_DIFFERENTIATION		52	0.62943	1.49711	0	0.201179	1	1946	tags=17%, list=9%, signal=19%
GO_REGULATION_OF_HOMOTYPIC_CELL_CELL_ADHESION	GO_REGULATION_OF_HOMOTYPIC_CELL_CELL_ADHESION		20	0.597357	1.49699	0	0.200954	1	2594	tags=35%, list=12%, signal=40%
GO_STEROID_DEHYDROGENASE_ACTIVITY_ACTING_ON_THE_CH_OH_GROUP_OF_DONORS_NAD_OR_NADP_AS_ACCEPTOR	GO_STEROID_DEHYDROGENASE_ACTIVITY_ACTING_ON_THE_CH_OH_GROUP_OF_DONORS_NAD_OR_NADP_AS_ACCEPTOR		19	0.515189	1.49694	0	0.200536	1	2414	tags=26%, list=11%, signal=30%
GO_INSULIN_LIKE_GROWTH_FACTOR_BINDING	GO_INSULIN_LIKE_GROWTH_FACTOR_BINDING		19	0.518774	1.49674	0	0.200316	1	92	tags=11%, list=0%, signal=11%
GO_POSITIVE_REGULATION_OF_WNT_SIGNALING_PATHWAY	GO_POSITIVE_REGULATION_OF_WNT_SIGNALING_PATHWAY		165	0.323855	1.49656	0	0.200229	1	4390	tags=18%, list=21%, signal=23%
GO_SUBPALLIUM_DEVELOPMENT	GO_SUBPALLIUM_DEVELOPMENT		22	0.542336	1.49477	0	0.201982	1	66	tags=9%, list=0%, signal=9%
GO_POSITIVE_REGULATION_OF_VASCULAR_ASSOCIATED_SMOOTH_MUSCLE_CELL_MIGRATION	GO_POSITIVE_REGULATION_OF_VASCULAR_ASSOCIATED_SMOOTH_MUSCLE_CELL_MIGRATION		16	0.589848	1.49404	0	0.202869	1	1399	tags=19%, list=7%, signal=20%
GO_GLYCOSYL_COMPOUND_BIOSYNTHETIC_PROCESS	GO_GLYCOSYL_COMPOUND_BIOSYNTHETIC_PROCESS		38	0.513779	1.49347	0.0745698	0.202786	1	3598	tags=21%, list=17%, signal=25%
GO_POSITIVE_REGULATION_OF_FIBROBLAST_PROLIFERATION	GO_POSITIVE_REGULATION_OF_FIBROBLAST_PROLIFERATION		45	0.46621	1.49308	0	0.202498	1	1493	tags=11%, list=7%, signal=12%
GO_REGULATION_OF_INTRINSIC_APOPTOTIC_SIGNALING_PATHWAY	GO_REGULATION_OF_INTRINSIC_APOPTOTIC_SIGNALING_PATHWAY		137	0.377789	1.49298	0	0.202084	1	4290	tags=15%, list=20%, signal=18%
GO_DIGESTIVE_TRACT_MORPHOGENESIS	GO_DIGESTIVE_TRACT_MORPHOGENESIS		43	0.407399	1.49286	0	0.201672	1	853	tags=12%, list=4%, signal=12%
GO_RESPONSE_TO_EPIDERMAL_GROWTH_FACTOR	GO_RESPONSE_TO_EPIDERMAL_GROWTH_FACTOR		45	0.430617	1.49283	0.0923379	0.201262	1	1465	tags=7%, list=7%, signal=7%
GO_RNA_POLYMERASE_ACTIVITY	GO_RNA_POLYMERASE_ACTIVITY		43	0.519782	1.49197	0	0.201855	1	59	tags=2%, list=0%, signal=2%
GO_EXTRACELLULAR_VESICLE_BIOGENESIS	GO_EXTRACELLULAR_VESICLE_BIOGENESIS		20	0.547728	1.49195	0.0994152	0.201447	1	2564	tags=10%, list=12%, signal=11%
GO_EMBRYONIC_CAMERA_TYPE_EYE_DEVELOPMENT	GO_EMBRYONIC_CAMERA_TYPE_EYE_DEVELOPMENT		35	0.493551	1.49105	0	0.202322	1	162	tags=9%, list=1%, signal=9%
GO_COFACTOR_METABOLIC_PROCESS	GO_COFACTOR_METABOLIC_PROCESS		361	0.318066	1.49057	0	0.202642	1	1743	tags=7%, list=8%, signal=8%
GO_MESENCHYMAL_CELL_DIFFERENTIATION	GO_MESENCHYMAL_CELL_DIFFERENTIATION		198	0.424022	1.49044	0	0.202374	1	3030	tags=18%, list=14%, signal=20%
GO_CARBON_OXYGEN_LYASE_ACTIVITY	GO_CARBON_OXYGEN_LYASE_ACTIVITY		60	0.453934	1.48984	0	0.203381	1	1474	tags=8%, list=7%, signal=9%
GO_AORTIC_VALVE_DEVELOPMENT	GO_AORTIC_VALVE_DEVELOPMENT		28	0.61854	1.48963	0	0.203351	1	1122	tags=14%, list=5%, signal=15%
GO_NEGATIVE_REGULATION_OF_RESPONSE_TO_DNA_DAMAGE_STIMULUS	GO_NEGATIVE_REGULATION_OF_RESPONSE_TO_DNA_DAMAGE_STIMULUS		70	0.537241	1.4891	0	0.203856	1	4660	tags=23%, list=22%, signal=29%
GO_REGULATION_OF_NUCLEAR_DIVISION	GO_REGULATION_OF_NUCLEAR_DIVISION		186	0.309317	1.48898	0	0.204024	1	3440	tags=10%, list=16%, signal=11%
GO_POSITIVE_REGULATION_OF_ERYTHROCYTE_DIFFERENTIATION	GO_POSITIVE_REGULATION_OF_ERYTHROCYTE_DIFFERENTIATION		24	0.445742	1.48847	0	0.204492	1	1164	tags=8%, list=5%, signal=9%
GO_REGULATION_OF_HEART_MORPHOGENESIS	GO_REGULATION_OF_HEART_MORPHOGENESIS		36	0.423007	1.48785	0	0.204672	1	592	tags=8%, list=3%, signal=9%
GO_POSITIVE_REGULATION_OF_IMMUNOGLOBULIN_PRODUCTION	GO_POSITIVE_REGULATION_OF_IMMUNOGLOBULIN_PRODUCTION		29	0.544643	1.48763	0	0.20461	1	1571	tags=10%, list=7%, signal=11%
GO_PURINE_CONTAINING_COMPOUND_METABOLIC_PROCESS	GO_PURINE_CONTAINING_COMPOUND_METABOLIC_PROCESS		138	0.360422	1.48733	0.084	0.204567	1	598	tags=6%, list=3%, signal=6%
GO_CARBOHYDRATE_KINASE_ACTIVITY	GO_CARBOHYDRATE_KINASE_ACTIVITY		20	0.555315	1.48704	0	0.204714	1	638	tags=10%, list=3%, signal=10%
GO_STEROID_DEHYDROGENASE_ACTIVITY	GO_STEROID_DEHYDROGENASE_ACTIVITY		23	0.564098	1.48678	0	0.204539	1	2414	tags=30%, list=11%, signal=34%
GO_POSITIVE_REGULATION_OF_B_CELL_ACTIVATION	GO_POSITIVE_REGULATION_OF_B_CELL_ACTIVATION		60	0.535977	1.48661	0	0.204881	1	1571	tags=18%, list=7%, signal=20%
GO_REGULATION_OF_MYELOID_CELL_DIFFERENTIATION	GO_REGULATION_OF_MYELOID_CELL_DIFFERENTIATION		204	0.335122	1.48561	0	0.205313	1	2155	tags=9%, list=10%, signal=10%
GO_TELOMERE_CAPPING	GO_TELOMERE_CAPPING		51	0.520882	1.48527	0	0.205567	1	1754	tags=8%, list=8%, signal=9%
GO_RESPIRATORY_GASEOUS_EXCHANGE	GO_RESPIRATORY_GASEOUS_EXCHANGE		53	0.461959	1.48396	0	0.207168	1	2198	tags=21%, list=10%, signal=23%
GO_POSITIVE_REGULATION_OF_CELLULAR_PROTEIN_LOCALIZATION	GO_POSITIVE_REGULATION_OF_CELLULAR_PROTEIN_LOCALIZATION		290	0.268419	1.483	0	0.208455	1	1711	tags=6%, list=8%, signal=6%
GO_OXIDOREDUCTASE_ACTIVITY_ACTING_ON_THE_ALDEHYDE_OR_OXO_GROUP_OF_DONORS_NAD_OR_NADP_AS_ACCEPTOR	GO_OXIDOREDUCTASE_ACTIVITY_ACTING_ON_THE_ALDEHYDE_OR_OXO_GROUP_OF_DONORS_NAD_OR_NADP_AS_ACCEPTOR		31	0.625233	1.48269	0	0.20821	1	2414	tags=23%, list=11%, signal=25%
GO_APICAL_PART_OF_CELL	GO_APICAL_PART_OF_CELL		277	0.418029	1.48156	0	0.208877	1	2426	tags=16%, list=11%, signal=18%
GO_NEGATIVE_REGULATION_OF_SIGNAL_TRANSDUCTION_BY_P53_CLASS_MEDIATOR	GO_NEGATIVE_REGULATION_OF_SIGNAL_TRANSDUCTION_BY_P53_CLASS_MEDIATOR		27	0.612184	1.48155	0	0.208473	1	4509	tags=30%, list=21%, signal=38%
GO_EPITHELIAL_TO_MESENCHYMAL_TRANSITION	GO_EPITHELIAL_TO_MESENCHYMAL_TRANSITION		124	0.43179	1.48128	0	0.20852	1	3407	tags=19%, list=16%, signal=23%
GO_POLYSOME	GO_POLYSOME		65	0.435051	1.48086	0	0.208834	1	35	tags=2%, list=0%, signal=2%
GO_POSITIVE_REGULATION_OF_NUCLEAR_DIVISION	GO_POSITIVE_REGULATION_OF_NUCLEAR_DIVISION		55	0.477643	1.48047	0	0.209151	1	1108	tags=9%, list=5%, signal=10%
GO_POSITIVE_REGULATION_OF_PROTEIN_SERINE_THREONINE_KINASE_ACTIVITY	GO_POSITIVE_REGULATION_OF_PROTEIN_SERINE_THREONINE_KINASE_ACTIVITY		292	0.353442	1.47998	0	0.209255	1	2711	tags=14%, list=13%, signal=15%
GO_MONOCARBOXYLIC_ACID_METABOLIC_PROCESS	GO_MONOCARBOXYLIC_ACID_METABOLIC_PROCESS		357	0.357659	1.47943	0	0.209327	1	1830	tags=10%, list=9%, signal=10%
GO_NEGATIVE_REGULATION_OF_CARDIAC_MUSCLE_CELL_DIFFERENTIATION	GO_NEGATIVE_REGULATION_OF_CARDIAC_MUSCLE_CELL_DIFFERENTIATION		15	0.530828	1.47917	0	0.20997	1	805	tags=13%, list=4%, signal=14%
GO_REGULATION_OF_MAP_KINASE_ACTIVITY	GO_REGULATION_OF_MAP_KINASE_ACTIVITY		291	0.339236	1.47869	0	0.209754	1	2711	tags=13%, list=13%, signal=15%
GO_POSITIVE_REGULATION_OF_ERK1_AND_ERK2_CASCADE	GO_POSITIVE_REGULATION_OF_ERK1_AND_ERK2_CASCADE		134	0.460705	1.47796	0	0.209879	1	1723	tags=18%, list=8%, signal=19%
GO_CYSTEINE_TYPE_ENDOPEPTIDASE_INHIBITOR_ACTIVITY	GO_CYSTEINE_TYPE_ENDOPEPTIDASE_INHIBITOR_ACTIVITY		30	0.536705	1.4778	0	0.209937	1	1465	tags=17%, list=7%, signal=18%
GO_REGULATION_OF_LIPID_BIOSYNTHETIC_PROCESS	GO_REGULATION_OF_LIPID_BIOSYNTHETIC_PROCESS		154	0.360242	1.47722	0	0.209959	1	1596	tags=8%, list=7%, signal=8%
GO_AORTA_DEVELOPMENT	GO_AORTA_DEVELOPMENT		49	0.437131	1.47701	0.0830189	0.210138	1	410	tags=6%, list=2%, signal=6%
GO_NUCLEOSIDE_PHOSPHATE_METABOLIC_PROCESS	GO_NUCLEOSIDE_PHOSPHATE_METABOLIC_PROCESS		187	0.354394	1.47688	0	0.210003	1	2561	tags=13%, list=12%, signal=14%
GO_POSITIVE_REGULATION_OF_PROTEIN_DEPOLYMERIZATION	GO_POSITIVE_REGULATION_OF_PROTEIN_DEPOLYMERIZATION		18	0.702391	1.47659	0	0.209755	1	2269	tags=28%, list=11%, signal=31%
GO_ORGANOPHOSPHATE_METABOLIC_PROCESS	GO_ORGANOPHOSPHATE_METABOLIC_PROCESS		446	0.31247	1.47618	0	0.209726	1	2561	tags=11%, list=12%, signal=12%
GO_REGULATION_OF_INTRINSIC_APOPTOTIC_SIGNALING_PATHWAY_BY_P53_CLASS_MEDIATOR	GO_REGULATION_OF_INTRINSIC_APOPTOTIC_SIGNALING_PATHWAY_BY_P53_CLASS_MEDIATOR		26	0.569149	1.47609	0	0.209641	1	4509	tags=23%, list=21%, signal=29%
GO_CELL_SUBSTRATE_JUNCTION	GO_CELL_SUBSTRATE_JUNCTION		384	0.218362	1.47558	0	0.209576	1	2861	tags=7%, list=13%, signal=8%
GO_CELLULAR_RESPONSE_TO_KETONE	GO_CELLULAR_RESPONSE_TO_KETONE		79	0.493919	1.47537	0	0.2094	1	1209	tags=13%, list=6%, signal=13%
GO_LATE_ENDOSOME	GO_LATE_ENDOSOME		218	0.357114	1.47496	0	0.209756	1	1873	tags=8%, list=9%, signal=9%
GO_REGULATION_OF_EPITHELIAL_TO_MESENCHYMAL_TRANSITION	GO_REGULATION_OF_EPITHELIAL_TO_MESENCHYMAL_TRANSITION		79	0.378837	1.47387	0	0.211081	1	3030	tags=16%, list=14%, signal=19%
GO_ERK1_AND_ERK2_CASCADE	GO_ERK1_AND_ERK2_CASCADE		219	0.43819	1.47382	0	0.210691	1	1267	tags=14%, list=6%, signal=15%
GO_VACUOLAR_LUMEN	GO_VACUOLAR_LUMEN		137	0.379104	1.47379	0	0.210303	1	2675	tags=12%, list=13%, signal=14%
GO_POSITIVE_REGULATION_OF_PRI_MIRNA_TRANSCRIPTION_BY_RNA_POLYMERASE_II	GO_POSITIVE_REGULATION_OF_PRI_MIRNA_TRANSCRIPTION_BY_RNA_POLYMERASE_II		27	0.720341	1.47339	0	0.210231	1	1664	tags=19%, list=8%, signal=20%
GO_ACTIN_FILAMENT_BUNDLE_ORGANIZATION	GO_ACTIN_FILAMENT_BUNDLE_ORGANIZATION		137	0.326129	1.47239	0	0.211257	1	1465	tags=7%, list=7%, signal=7%
GO_CYTOKINE_BINDING	GO_CYTOKINE_BINDING		87	0.500358	1.47184	0	0.211763	1	1541	tags=17%, list=7%, signal=19%
GO_DIVALENT_INORGANIC_CATION_TRANSPORT	GO_DIVALENT_INORGANIC_CATION_TRANSPORT		356	0.413804	1.47155	0	0.211585	1	2007	tags=16%, list=9%, signal=18%
GO_EXTRACELLULAR_MATRIX_BINDING	GO_EXTRACELLULAR_MATRIX_BINDING		53	0.593271	1.47145	0	0.211328	1	1727	tags=26%, list=8%, signal=29%
GO_PHOSPHATIDYLCHOLINE_BIOSYNTHETIC_PROCESS	GO_PHOSPHATIDYLCHOLINE_BIOSYNTHETIC_PROCESS		35	0.444898	1.47097	0.0959184	0.212148	1	2927	tags=11%, list=14%, signal=13%
GO_REGULATION_OF_RESPONSE_TO_BIOTIC_STIMULUS	GO_REGULATION_OF_RESPONSE_TO_BIOTIC_STIMULUS		99	0.459441	1.47082	0	0.211763	1	4286	tags=21%, list=20%, signal=26%
GO_RESPONSE_TO_CORTICOSTEROID	GO_RESPONSE_TO_CORTICOSTEROID		132	0.443959	1.4705	0	0.211897	1	3024	tags=22%, list=14%, signal=25%
GO_POSITIVE_REGULATION_OF_CELL_MATRIX_ADHESION	GO_POSITIVE_REGULATION_OF_CELL_MATRIX_ADHESION		39	0.554957	1.46942	0	0.212668	1	1147	tags=13%, list=5%, signal=14%
GO_COLLAGEN_CATABOLIC_PROCESS	GO_COLLAGEN_CATABOLIC_PROCESS		37	0.773161	1.46937	0	0.212511	1	1389	tags=32%, list=7%, signal=35%
GO_PROTEIN_TETRAMERIZATION	GO_PROTEIN_TETRAMERIZATION		144	0.433458	1.46921	0	0.212552	1	1249	tags=8%, list=6%, signal=8%
GO_COLLAGEN_CONTAINING_EXTRACELLULAR_MATRIX	GO_COLLAGEN_CONTAINING_EXTRACELLULAR_MATRIX		293	0.453491	1.46915	0	0.212171	1	1967	tags=18%, list=9%, signal=20%
GO_PIGMENT_GRANULE_LOCALIZATION	GO_PIGMENT_GRANULE_LOCALIZATION		25	0.493767	1.46834	0.0875	0.213109	1	1438	tags=12%, list=7%, signal=13%
GO_REPRESSING_TRANSCRIPTION_FACTOR_BINDING	GO_REPRESSING_TRANSCRIPTION_FACTOR_BINDING		68	0.375228	1.46809	0	0.213089	1	924	tags=6%, list=4%, signal=6%
GO_CARBOHYDRATE_PHOSPHORYLATION	GO_CARBOHYDRATE_PHOSPHORYLATION		23	0.514161	1.46804	0	0.212875	1	638	tags=9%, list=3%, signal=9%
GO_VACUOLAR_PART	GO_VACUOLAR_PART		478	0.324067	1.46791	0	0.212496	1	2685	tags=10%, list=13%, signal=12%
GO_NEGATIVE_REGULATION_OF_SMALL_MOLECULE_METABOLIC_PROCESS	GO_NEGATIVE_REGULATION_OF_SMALL_MOLECULE_METABOLIC_PROCESS		59	0.473601	1.46752	0	0.212842	1	895	tags=12%, list=4%, signal=12%
GO_COENZYME_METABOLIC_PROCESS	GO_COENZYME_METABOLIC_PROCESS		222	0.278577	1.46642	0	0.213686	1	1743	tags=7%, list=8%, signal=7%
GO_PROTEIN_HETEROTETRAMERIZATION	GO_PROTEIN_HETEROTETRAMERIZATION		49	0.559652	1.46632	0	0.213307	1	1754	tags=10%, list=8%, signal=11%
GO_SEX_DETERMINATION	GO_SEX_DETERMINATION		17	0.599353	1.4661	0	0.213605	1	910	tags=18%, list=4%, signal=18%
GO_CARBOHYDRATE_HOMEOSTASIS	GO_CARBOHYDRATE_HOMEOSTASIS		193	0.416057	1.4659	0	0.213367	1	2362	tags=13%, list=11%, signal=14%
GO_METALLOCARBOXYPEPTIDASE_ACTIVITY	GO_METALLOCARBOXYPEPTIDASE_ACTIVITY		18	0.555621	1.46562	0	0.213154	1	300	tags=17%, list=1%, signal=17%
GO_RESPONSE_TO_GONADOTROPIN	GO_RESPONSE_TO_GONADOTROPIN		23	0.502165	1.46561	0	0.21278	1	435	tags=13%, list=2%, signal=13%
GO_MYOSIN_V_BINDING	GO_MYOSIN_V_BINDING		17	0.595183	1.46555	0	0.212408	1	1176	tags=12%, list=6%, signal=12%
GO_POSITIVE_REGULATION_OF_HORMONE_SECRETION	GO_POSITIVE_REGULATION_OF_HORMONE_SECRETION		98	0.543296	1.46501	0	0.212903	1	2572	tags=22%, list=12%, signal=25%
GO_T_CELL_HOMEOSTASIS	GO_T_CELL_HOMEOSTASIS		25	0.512245	1.46486	0	0.212532	1	0	tags=4%, list=0%, signal=4%
GO_SEMI_LUNAR_VALVE_DEVELOPMENT	GO_SEMI_LUNAR_VALVE_DEVELOPMENT		36	0.59731	1.46466	0	0.212804	1	1122	tags=14%, list=5%, signal=15%
GO_REGULATION_OF_ADHERENS_JUNCTION_ORGANIZATION	GO_REGULATION_OF_ADHERENS_JUNCTION_ORGANIZATION		61	0.301759	1.46441	0	0.212554	1	1842	tags=7%, list=9%, signal=7%
GO_ESTABLISHMENT_OF_PIGMENT_GRANULE_LOCALIZATION	GO_ESTABLISHMENT_OF_PIGMENT_GRANULE_LOCALIZATION		23	0.506605	1.46426	0.0875	0.212186	1	1438	tags=13%, list=7%, signal=14%
GO_L_ALPHA_AMINO_ACID_TRANSMEMBRANE_TRANSPORT	GO_L_ALPHA_AMINO_ACID_TRANSMEMBRANE_TRANSPORT		44	0.545255	1.46415	0	0.211922	1	2198	tags=20%, list=10%, signal=23%
GO_OSTEOBLAST_DIFFERENTIATION	GO_OSTEOBLAST_DIFFERENTIATION		182	0.357056	1.4641	0	0.211701	1	1903	tags=11%, list=9%, signal=12%
GO_P38MAPK_CASCADE	GO_P38MAPK_CASCADE		36	0.479496	1.46355	0	0.212317	1	2712	tags=17%, list=13%, signal=19%
GO_ALCOHOL_METABOLIC_PROCESS	GO_ALCOHOL_METABOLIC_PROCESS		182	0.373767	1.46308	0	0.212547	1	2053	tags=12%, list=10%, signal=13%
GO_RENAL_FILTRATION	GO_RENAL_FILTRATION		15	0.694418	1.46261	0	0.212483	1	2135	tags=27%, list=10%, signal=30%
GO_AUTOPHAGOSOME_MATURATION	GO_AUTOPHAGOSOME_MATURATION		34	0.409754	1.46168	0	0.212704	1	1260	tags=9%, list=6%, signal=9%
GO_PHOSPHATASE_ACTIVATOR_ACTIVITY	GO_PHOSPHATASE_ACTIVATOR_ACTIVITY		16	0.469887	1.46096	0.078629	0.21297	1	592	tags=6%, list=3%, signal=6%
GO_REGULATION_OF_EPITHELIAL_CELL_APOPTOTIC_PROCESS	GO_REGULATION_OF_EPITHELIAL_CELL_APOPTOTIC_PROCESS		58	0.431235	1.45999	0	0.213631	1	2414	tags=17%, list=11%, signal=19%
GO_TEMPERATURE_HOMEOSTASIS	GO_TEMPERATURE_HOMEOSTASIS		141	0.366149	1.45984	0	0.213582	1	2402	tags=16%, list=11%, signal=18%
GO_LEUKOCYTE_HOMEOSTASIS	GO_LEUKOCYTE_HOMEOSTASIS		65	0.560989	1.45983	0	0.213432	1	4017	tags=26%, list=19%, signal=32%
GO_CELLULAR_COMPONENT_DISASSEMBLY	GO_CELLULAR_COMPONENT_DISASSEMBLY		485	0.295485	1.4594	0	0.213176	1	2535	tags=7%, list=12%, signal=8%
GO_POSITIVE_REGULATION_OF_SECRETION	GO_POSITIVE_REGULATION_OF_SECRETION		307	0.397063	1.45925	0	0.213208	1	2140	tags=17%, list=10%, signal=18%
GO_NUCLEOTIDE_SUGAR_BIOSYNTHETIC_PROCESS	GO_NUCLEOTIDE_SUGAR_BIOSYNTHETIC_PROCESS		22	0.628249	1.4589	0	0.213524	1	4417	tags=23%, list=21%, signal=29%
GO_POSITIVE_REGULATION_OF_CELL_DIVISION	GO_POSITIVE_REGULATION_OF_CELL_DIVISION		64	0.427524	1.4577	0	0.213927	1	1589	tags=11%, list=7%, signal=12%
GO_CHROMOSOME_TELOMERIC_REGION	GO_CHROMOSOME_TELOMERIC_REGION		147	0.372599	1.45722	0	0.213957	1	6474	tags=25%, list=30%, signal=36%
GO_CYTOKINE_SECRETION	GO_CYTOKINE_SECRETION		136	0.473207	1.4569	0	0.213905	1	1913	tags=18%, list=9%, signal=20%
GO_T_CELL_RECEPTOR_SIGNALING_PATHWAY	GO_T_CELL_RECEPTOR_SIGNALING_PATHWAY		157	0.452085	1.45689	0	0.213548	1	2518	tags=13%, list=12%, signal=14%
GO_CELLULAR_RESPONSE_TO_NUTRIENT	GO_CELLULAR_RESPONSE_TO_NUTRIENT		57	0.411088	1.45668	0	0.213458	1	2269	tags=18%, list=11%, signal=20%
GO_AMMONIUM_ION_BINDING	GO_AMMONIUM_ION_BINDING		44	0.535581	1.45657	0	0.213257	1	647	tags=14%, list=3%, signal=14%
GO_MULTI_ORGANISM_CELLULAR_PROCESS	GO_MULTI_ORGANISM_CELLULAR_PROCESS		33	0.565525	1.45657	0	0.212904	1	1006	tags=12%, list=5%, signal=13%
GO_RECEPTOR_METABOLIC_PROCESS	GO_RECEPTOR_METABOLIC_PROCESS		156	0.345383	1.45651	0	0.212552	1	1664	tags=10%, list=8%, signal=10%
GO_LONG_CHAIN_FATTY_ACYL_COA_BIOSYNTHETIC_PROCESS	GO_LONG_CHAIN_FATTY_ACYL_COA_BIOSYNTHETIC_PROCESS		18	0.68739	1.45631	0	0.212315	1	2561	tags=22%, list=12%, signal=25%
GO_GOLGI_CISTERNA_MEMBRANE	GO_GOLGI_CISTERNA_MEMBRANE		68	0.420607	1.45622	0	0.211966	1	4744	tags=25%, list=22%, signal=32%
GO_SH3_DOMAIN_BINDING	GO_SH3_DOMAIN_BINDING		116	0.465501	1.45601	0	0.211957	1	3245	tags=17%, list=15%, signal=20%
GO_POSITIVE_REGULATION_OF_LOCOMOTION	GO_POSITIVE_REGULATION_OF_LOCOMOTION		431	0.379805	1.4555	0	0.212014	1	2727	tags=16%, list=13%, signal=19%
GO_L_AMINO_ACID_TRANSPORT	GO_L_AMINO_ACID_TRANSPORT		52	0.540858	1.45474	0	0.213831	1	2198	tags=21%, list=10%, signal=24%
GO_VASCULAR_ENDOTHELIAL_CELL_PROLIFERATION	GO_VASCULAR_ENDOTHELIAL_CELL_PROLIFERATION		15	0.539989	1.45459	0	0.213482	1	1664	tags=20%, list=8%, signal=22%
GO_POSTSYNAPTIC_SPECIALIZATION_INTRACELLULAR_COMPONENT	GO_POSTSYNAPTIC_SPECIALIZATION_INTRACELLULAR_COMPONENT		20	0.396425	1.45441	0	0.213257	1	165	tags=5%, list=1%, signal=5%
GO_CHONDROITIN_SULFATE_BIOSYNTHETIC_PROCESS	GO_CHONDROITIN_SULFATE_BIOSYNTHETIC_PROCESS		26	0.716784	1.45434	0	0.213344	1	1545	tags=31%, list=7%, signal=33%
GO_REGULATION_OF_B_CELL_ACTIVATION	GO_REGULATION_OF_B_CELL_ACTIVATION		91	0.428941	1.45403	0	0.213749	1	1571	tags=15%, list=7%, signal=17%
GO_DRUG_TRANSMEMBRANE_TRANSPORT	GO_DRUG_TRANSMEMBRANE_TRANSPORT		65	0.437039	1.45344	0	0.214176	1	2198	tags=17%, list=10%, signal=19%
GO_RESPONSE_TO_THYROID_HORMONE	GO_RESPONSE_TO_THYROID_HORMONE		23	0.595822	1.45329	0	0.21383	1	150	tags=9%, list=1%, signal=9%
GO_SERINE_FAMILY_AMINO_ACID_BIOSYNTHETIC_PROCESS	GO_SERINE_FAMILY_AMINO_ACID_BIOSYNTHETIC_PROCESS		17	0.530911	1.45323	0	0.213704	1	1332	tags=12%, list=6%, signal=13%
GO_REGULATION_OF_INTRINSIC_APOPTOTIC_SIGNALING_PATHWAY_IN_RESPONSE_TO_DNA_DAMAGE	GO_REGULATION_OF_INTRINSIC_APOPTOTIC_SIGNALING_PATHWAY_IN_RESPONSE_TO_DNA_DAMAGE		36	0.633623	1.45317	0	0.213361	1	2426	tags=14%, list=11%, signal=16%
GO_NUCLEOBASE_CONTAINING_SMALL_MOLECULE_BIOSYNTHETIC_PROCESS	GO_NUCLEOBASE_CONTAINING_SMALL_MOLECULE_BIOSYNTHETIC_PROCESS		94	0.400475	1.45314	0	0.213018	1	1521	tags=13%, list=7%, signal=14%
GO_LEUKOCYTE_PROLIFERATION	GO_LEUKOCYTE_PROLIFERATION		189	0.428497	1.45198	0	0.213671	1	1723	tags=15%, list=8%, signal=16%
GO_ORGANIC_ANION_TRANSMEMBRANE_TRANSPORTER_ACTIVITY	GO_ORGANIC_ANION_TRANSMEMBRANE_TRANSPORTER_ACTIVITY		149	0.366502	1.45155	0	0.214188	1	2241	tags=13%, list=11%, signal=14%
GO_REGULATION_OF_LEUKOCYTE_PROLIFERATION	GO_REGULATION_OF_LEUKOCYTE_PROLIFERATION		143	0.461255	1.4515	0	0.213846	1	1723	tags=17%, list=8%, signal=18%
GO_REGULATION_OF_VASCULATURE_DEVELOPMENT	GO_REGULATION_OF_VASCULATURE_DEVELOPMENT		253	0.421849	1.45081	0	0.21464	1	2119	tags=17%, list=10%, signal=18%
GO_EAR_DEVELOPMENT	GO_EAR_DEVELOPMENT		185	0.401826	1.4508	0	0.214424	1	1354	tags=11%, list=6%, signal=12%
GO_REGULATION_OF_PROTEIN_COMPLEX_ASSEMBLY	GO_REGULATION_OF_PROTEIN_COMPLEX_ASSEMBLY		376	0.299206	1.45078	0	0.214083	1	1526	tags=7%, list=7%, signal=7%
GO_NEGATIVE_REGULATION_OF_CYTOKINE_SECRETION	GO_NEGATIVE_REGULATION_OF_CYTOKINE_SECRETION		39	0.537977	1.4506	0	0.213855	1	1381	tags=21%, list=6%, signal=22%
GO_INVADOPODIUM	GO_INVADOPODIUM		15	0.750333	1.45041	0	0.21377	1	192	tags=13%, list=1%, signal=13%
GO_POSITIVE_REGULATION_OF_FOCAL_ADHESION_ASSEMBLY	GO_POSITIVE_REGULATION_OF_FOCAL_ADHESION_ASSEMBLY		21	0.581665	1.45038	0	0.213433	1	1147	tags=14%, list=5%, signal=15%
GO_LIPID_HOMEOSTASIS	GO_LIPID_HOMEOSTASIS		96	0.522256	1.44924	0	0.215067	1	2913	tags=19%, list=14%, signal=22%
GO_APICOLATERAL_PLASMA_MEMBRANE	GO_APICOLATERAL_PLASMA_MEMBRANE		15	0.617636	1.44886	0	0.21488	1	2436	tags=27%, list=11%, signal=30%
GO_REGULATION_OF_COLLATERAL_SPROUTING	GO_REGULATION_OF_COLLATERAL_SPROUTING		18	0.496319	1.44809	0	0.215069	1	998	tags=17%, list=5%, signal=17%
GO_DIVALENT_INORGANIC_CATION_HOMEOSTASIS	GO_DIVALENT_INORGANIC_CATION_HOMEOSTASIS		347	0.388777	1.44801	0	0.214854	1	2727	tags=19%, list=13%, signal=21%
GO_RESPONSE_TO_TUMOR_NECROSIS_FACTOR	GO_RESPONSE_TO_TUMOR_NECROSIS_FACTOR		224	0.399001	1.44761	0	0.214614	1	2155	tags=12%, list=10%, signal=13%
GO_REGULATION_OF_GENE_EXPRESSION_EPIGENETIC	GO_REGULATION_OF_GENE_EXPRESSION_EPIGENETIC		315	0.260186	1.44709	0	0.214985	1	1754	tags=4%, list=8%, signal=4%
GO_NUCLEOSIDE_TRIPHOSPHATE_METABOLIC_PROCESS	GO_NUCLEOSIDE_TRIPHOSPHATE_METABOLIC_PROCESS		51	0.457015	1.44618	0.107004	0.215684	1	268	tags=6%, list=1%, signal=6%
GO_PROTEOGLYCAN_METABOLIC_PROCESS	GO_PROTEOGLYCAN_METABOLIC_PROCESS		69	0.502447	1.44603	0	0.215493	1	1545	tags=16%, list=7%, signal=17%
GO_POSITIVE_REGULATION_OF_CYTOKINE_PRODUCTION	GO_POSITIVE_REGULATION_OF_CYTOKINE_PRODUCTION		310	0.49097	1.44553	0	0.215871	1	2185	tags=20%, list=10%, signal=22%
GO_NEGATIVE_REGULATION_OF_PEPTIDASE_ACTIVITY	GO_NEGATIVE_REGULATION_OF_PEPTIDASE_ACTIVITY		157	0.394338	1.44553	0	0.215537	1	1626	tags=13%, list=8%, signal=14%
GO_MODIFICATION_BY_SYMBIONT_OF_HOST_MORPHOLOGY_OR_PHYSIOLOGY	GO_MODIFICATION_BY_SYMBIONT_OF_HOST_MORPHOLOGY_OR_PHYSIOLOGY		36	0.528667	1.44525	0	0.215431	1	3753	tags=19%, list=18%, signal=24%
GO_POSITIVE_REGULATION_OF_CANONICAL_WNT_SIGNALING_PATHWAY	GO_POSITIVE_REGULATION_OF_CANONICAL_WNT_SIGNALING_PATHWAY		134	0.279169	1.44498	0	0.215411	1	4522	tags=16%, list=21%, signal=21%
GO_GROWTH_FACTOR_BINDING	GO_GROWTH_FACTOR_BINDING		116	0.415905	1.44494	0	0.215174	1	957	tags=11%, list=4%, signal=12%
GO_REGULATION_OF_LEUKOCYTE_CHEMOTAXIS	GO_REGULATION_OF_LEUKOCYTE_CHEMOTAXIS		70	0.510104	1.44492	0	0.214843	1	2964	tags=26%, list=14%, signal=30%
GO_METANEPHRIC_NEPHRON_DEVELOPMENT	GO_METANEPHRIC_NEPHRON_DEVELOPMENT		35	0.625458	1.44473	0	0.214639	1	1281	tags=23%, list=6%, signal=24%
GO_LIPID_CATABOLIC_PROCESS	GO_LIPID_CATABOLIC_PROCESS		242	0.367909	1.44451	0	0.214785	1	2194	tags=10%, list=10%, signal=11%
GO_MODULATION_BY_SYMBIONT_OF_HOST_CELLULAR_PROCESS	GO_MODULATION_BY_SYMBIONT_OF_HOST_CELLULAR_PROCESS		25	0.602867	1.44421	0	0.215107	1	3477	tags=20%, list=16%, signal=24%
GO_POLYOL_METABOLIC_PROCESS	GO_POLYOL_METABOLIC_PROCESS		60	0.508585	1.44381	0	0.215293	1	3623	tags=18%, list=17%, signal=22%
GO_MESONEPHRIC_TUBULE_MORPHOGENESIS	GO_MESONEPHRIC_TUBULE_MORPHOGENESIS		61	0.495271	1.44268	0	0.216382	1	1168	tags=13%, list=5%, signal=14%
GO_RESPONSE_TO_ISCHEMIA	GO_RESPONSE_TO_ISCHEMIA		40	0.42226	1.4426	0	0.216053	1	231	tags=8%, list=1%, signal=8%
GO_PROTEIN_KINASE_C_BINDING	GO_PROTEIN_KINASE_C_BINDING		43	0.426949	1.44251	0.106796	0.215726	1	1155	tags=7%, list=5%, signal=7%
GO_NUCLEOSOMAL_DNA_BINDING	GO_NUCLEOSOMAL_DNA_BINDING		50	0.461751	1.44239	0	0.2154	1	1511	tags=8%, list=7%, signal=9%
GO_POSITIVE_REGULATION_OF_MULTI_ORGANISM_PROCESS	GO_POSITIVE_REGULATION_OF_MULTI_ORGANISM_PROCESS		154	0.467746	1.44211	0	0.215188	1	3856	tags=16%, list=18%, signal=19%
GO_POSITIVE_REGULATION_OF_TRANSCRIPTION_FROM_RNA_POLYMERASE_II_PROMOTER_INVOLVED_IN_CELLULAR_RESPONSE_TO_CHEMICAL_STIMULUS	GO_POSITIVE_REGULATION_OF_TRANSCRIPTION_FROM_RNA_POLYMERASE_II_PROMOTER_INVOLVED_IN_CELLULAR_RESPONSE_TO_CHEMICAL_STIMULUS		21	0.599505	1.44152	0	0.21551	1	929	tags=14%, list=4%, signal=15%
GO_POSITIVE_REGULATION_OF_P38MAPK_CASCADE	GO_POSITIVE_REGULATION_OF_P38MAPK_CASCADE		22	0.534725	1.44128	0	0.215691	1	3460	tags=27%, list=16%, signal=33%
GO_NEGATIVE_REGULATION_OF_CELLULAR_RESPONSE_TO_INSULIN_STIMULUS	GO_NEGATIVE_REGULATION_OF_CELLULAR_RESPONSE_TO_INSULIN_STIMULUS		31	0.658499	1.44122	0	0.215367	1	2223	tags=23%, list=10%, signal=25%
GO_GUANYL_NUCLEOTIDE_EXCHANGE_FACTOR_ACTIVITY	GO_GUANYL_NUCLEOTIDE_EXCHANGE_FACTOR_ACTIVITY		197	0.368406	1.44078	0	0.215231	1	3711	tags=18%, list=17%, signal=21%
GO_REGULATION_OF_LEUKOCYTE_MIGRATION	GO_REGULATION_OF_LEUKOCYTE_MIGRATION		120	0.51657	1.44075	0	0.21491	1	2705	tags=26%, list=13%, signal=29%
GO_REGULATION_OF_ERYTHROCYTE_DIFFERENTIATION	GO_REGULATION_OF_ERYTHROCYTE_DIFFERENTIATION		39	0.354346	1.44017	0	0.215455	1	1784	tags=8%, list=8%, signal=8%
GO_CARBOHYDRATE_TRANSMEMBRANE_TRANSPORT	GO_CARBOHYDRATE_TRANSMEMBRANE_TRANSPORT		90	0.401678	1.43965	0	0.215972	1	847	tags=9%, list=4%, signal=9%
GO_NEGATIVE_REGULATION_OF_TRANSPORT	GO_NEGATIVE_REGULATION_OF_TRANSPORT		361	0.354505	1.4396	0	0.21565	1	2007	tags=12%, list=9%, signal=14%
GO_AMINOGLYCAN_METABOLIC_PROCESS	GO_AMINOGLYCAN_METABOLIC_PROCESS		117	0.440922	1.43953	0	0.21533	1	3556	tags=26%, list=17%, signal=31%
GO_POSITIVE_REGULATION_OF_LYMPHOCYTE_ACTIVATION	GO_POSITIVE_REGULATION_OF_LYMPHOCYTE_ACTIVATION		193	0.487071	1.43915	0	0.215483	1	2027	tags=19%, list=9%, signal=20%
GO_TORC1_SIGNALING	GO_TORC1_SIGNALING		35	0.546148	1.43854	0	0.216033	1	4184	tags=20%, list=20%, signal=25%
GO_RECYCLING_ENDOSOME_MEMBRANE	GO_RECYCLING_ENDOSOME_MEMBRANE		77	0.512228	1.43848	0	0.216134	1	2468	tags=16%, list=12%, signal=18%
GO_NUCLEOSOME_BINDING	GO_NUCLEOSOME_BINDING		76	0.374088	1.43822	0	0.216261	1	1511	tags=5%, list=7%, signal=6%
GO_ACETYLGLUCOSAMINYLTRANSFERASE_ACTIVITY	GO_ACETYLGLUCOSAMINYLTRANSFERASE_ACTIVITY		46	0.491584	1.43802	0	0.215943	1	4776	tags=28%, list=22%, signal=36%
GO_CARBOHYDRATE_METABOLIC_PROCESS	GO_CARBOHYDRATE_METABOLIC_PROCESS		462	0.348635	1.43763	0	0.216474	1	2155	tags=10%, list=10%, signal=11%
GO_EXTRACELLULAR_MATRIX_COMPONENT	GO_EXTRACELLULAR_MATRIX_COMPONENT		45	0.528683	1.43706	0	0.216875	1	1790	tags=20%, list=8%, signal=22%
GO_REGULATION_OF_NITRIC_OXIDE_SYNTHASE_ACTIVITY	GO_REGULATION_OF_NITRIC_OXIDE_SYNTHASE_ACTIVITY		36	0.518509	1.43676	0	0.216643	1	204	tags=6%, list=1%, signal=6%
GO_TRANSPORT_VESICLE_MEMBRANE	GO_TRANSPORT_VESICLE_MEMBRANE		179	0.371916	1.43491	0	0.219056	1	1116	tags=10%, list=5%, signal=11%
GO_EXTRACELLULAR_MATRIX	GO_EXTRACELLULAR_MATRIX		377	0.473341	1.43412	0	0.220054	1	1967	tags=20%, list=9%, signal=22%
GO_NEGATIVE_REGULATION_OF_VASCULATURE_DEVELOPMENT	GO_NEGATIVE_REGULATION_OF_VASCULATURE_DEVELOPMENT		92	0.503594	1.4341	0	0.219733	1	2119	tags=18%, list=10%, signal=20%
GO_POSITIVE_REGULATION_OF_DNA_BINDING_TRANSCRIPTION_FACTOR_ACTIVITY	GO_POSITIVE_REGULATION_OF_DNA_BINDING_TRANSCRIPTION_FACTOR_ACTIVITY		219	0.341148	1.43393	0	0.219593	1	1043	tags=9%, list=5%, signal=9%
GO_REGULATION_OF_DNA_BIOSYNTHETIC_PROCESS	GO_REGULATION_OF_DNA_BIOSYNTHETIC_PROCESS		97	0.348554	1.43385	0	0.219372	1	3247	tags=10%, list=15%, signal=12%
GO_PLASMA_MEMBRANE_RECEPTOR_COMPLEX	GO_PLASMA_MEMBRANE_RECEPTOR_COMPLEX		150	0.4706	1.43344	0	0.219487	1	1184	tags=19%, list=6%, signal=20%
GO_POSITIVE_REGULATION_OF_CELL_SUBSTRATE_ADHESION	GO_POSITIVE_REGULATION_OF_CELL_SUBSTRATE_ADHESION		97	0.483107	1.43343	0	0.219169	1	2396	tags=19%, list=11%, signal=21%
GO_TETRAPYRROLE_BIOSYNTHETIC_PROCESS	GO_TETRAPYRROLE_BIOSYNTHETIC_PROCESS		25	0.442012	1.43274	0	0.219474	1	306	tags=4%, list=1%, signal=4%
GO_BETA_CATENIN_TCF_COMPLEX_ASSEMBLY	GO_BETA_CATENIN_TCF_COMPLEX_ASSEMBLY		30	0.531229	1.43242	0	0.219631	1	2935	tags=13%, list=14%, signal=15%
GO_FATTY_ACYL_COA_BIOSYNTHETIC_PROCESS	GO_FATTY_ACYL_COA_BIOSYNTHETIC_PROCESS		29	0.68388	1.43227	0	0.219433	1	2561	tags=21%, list=12%, signal=23%
GO_IMPORT_INTO_NUCLEUS	GO_IMPORT_INTO_NUCLEUS		139	0.307253	1.43192	0	0.219458	1	1803	tags=5%, list=8%, signal=5%
GO_GLUCOSE_METABOLIC_PROCESS	GO_GLUCOSE_METABOLIC_PROCESS		99	0.349405	1.43087	0.0903226	0.219958	1	1880	tags=9%, list=9%, signal=10%
GO_CELL_RECOGNITION	GO_CELL_RECOGNITION		100	0.512445	1.43076	0	0.219643	1	2775	tags=25%, list=13%, signal=29%
GO_FATTY_ACID_DERIVATIVE_BIOSYNTHETIC_PROCESS	GO_FATTY_ACID_DERIVATIVE_BIOSYNTHETIC_PROCESS		46	0.478821	1.43012	0.185417	0.220584	1	1597	tags=15%, list=7%, signal=16%
GO_ORGANOPHOSPHATE_BIOSYNTHETIC_PROCESS	GO_ORGANOPHOSPHATE_BIOSYNTHETIC_PROCESS		477	0.266568	1.42994	0	0.220503	1	1711	tags=5%, list=8%, signal=6%
GO_ENDOTHELIAL_CELL_DEVELOPMENT	GO_ENDOTHELIAL_CELL_DEVELOPMENT		52	0.48372	1.42983	0	0.220298	1	1766	tags=10%, list=8%, signal=10%
GO_ATP_METABOLIC_PROCESS	GO_ATP_METABOLIC_PROCESS		38	0.51069	1.42907	0.107004	0.221169	1	268	tags=8%, list=1%, signal=8%
GO_INTRINSIC_APOPTOTIC_SIGNALING_PATHWAY_IN_RESPONSE_TO_OXIDATIVE_STRESS	GO_INTRINSIC_APOPTOTIC_SIGNALING_PATHWAY_IN_RESPONSE_TO_OXIDATIVE_STRESS		37	0.406399	1.42892	0	0.220971	1	2396	tags=11%, list=11%, signal=12%
GO_SULFUR_COMPOUND_BIOSYNTHETIC_PROCESS	GO_SULFUR_COMPOUND_BIOSYNTHETIC_PROCESS		154	0.40215	1.42877	0	0.220657	1	1597	tags=12%, list=7%, signal=13%
GO_CHANNEL_REGULATOR_ACTIVITY	GO_CHANNEL_REGULATOR_ACTIVITY		108	0.427755	1.42831	0	0.220697	1	703	tags=12%, list=3%, signal=12%
GO_NUCLEAR_CHROMOSOME_TELOMERIC_REGION	GO_NUCLEAR_CHROMOSOME_TELOMERIC_REGION		114	0.410056	1.4282	0	0.220617	1	6474	tags=26%, list=30%, signal=38%
GO_CENTRIOLE	GO_CENTRIOLE		125	0.347539	1.42776	0	0.220965	1	2288	tags=8%, list=11%, signal=9%
GO_AXON_PART	GO_AXON_PART		334	0.348596	1.42772	0	0.220758	1	2853	tags=15%, list=13%, signal=17%
GO_NEGATIVE_REGULATION_OF_INTRINSIC_APOPTOTIC_SIGNALING_PATHWAY_IN_RESPONSE_TO_DNA_DAMAGE	GO_NEGATIVE_REGULATION_OF_INTRINSIC_APOPTOTIC_SIGNALING_PATHWAY_IN_RESPONSE_TO_DNA_DAMAGE		29	0.667462	1.42662	0	0.221826	1	2426	tags=17%, list=11%, signal=19%
GO_NEGATIVE_REGULATION_OF_CELLULAR_RESPONSE_TO_GROWTH_FACTOR_STIMULUS	GO_NEGATIVE_REGULATION_OF_CELLULAR_RESPONSE_TO_GROWTH_FACTOR_STIMULUS		119	0.382826	1.42581	0	0.223158	1	1685	tags=11%, list=8%, signal=12%
GO_REGULATION_OF_PROTEIN_MATURATION	GO_REGULATION_OF_PROTEIN_MATURATION		49	0.527984	1.42542	0.0990476	0.223231	1	3120	tags=22%, list=15%, signal=26%
GO_CORE_PROMOTER_SEQUENCE_SPECIFIC_DNA_BINDING	GO_CORE_PROMOTER_SEQUENCE_SPECIFIC_DNA_BINDING		42	0.488202	1.42524	0	0.223375	1	1168	tags=7%, list=5%, signal=8%
GO_CALCIUM_DEPENDENT_PROTEIN_BINDING	GO_CALCIUM_DEPENDENT_PROTEIN_BINDING		50	0.470001	1.42518	0	0.223062	1	1031	tags=8%, list=5%, signal=8%
GO_ACTIVATION_OF_MAPKK_ACTIVITY	GO_ACTIVATION_OF_MAPKK_ACTIVITY		52	0.340204	1.42515	0	0.222847	1	2396	tags=10%, list=11%, signal=11%
GO_EATING_BEHAVIOR	GO_EATING_BEHAVIOR		19	0.708803	1.42501	0	0.222664	1	857	tags=32%, list=4%, signal=33%
GO_CELLULAR_RESPONSE_TO_OXYGEN_LEVELS	GO_CELLULAR_RESPONSE_TO_OXYGEN_LEVELS		208	0.281653	1.42422	0	0.223408	1	1886	tags=7%, list=9%, signal=8%
GO_ENDOPEPTIDASE_REGULATOR_ACTIVITY	GO_ENDOPEPTIDASE_REGULATOR_ACTIVITY		98	0.459909	1.42389	0	0.223556	1	2818	tags=21%, list=13%, signal=25%
GO_VACUOLAR_MEMBRANE	GO_VACUOLAR_MEMBRANE		359	0.3051	1.42387	0	0.223496	1	2685	tags=10%, list=13%, signal=11%
GO_SKIN_DEVELOPMENT	GO_SKIN_DEVELOPMENT		206	0.340399	1.42369	0	0.223557	1	2675	tags=14%, list=13%, signal=15%
GO_ZINC_ION_TRANSMEMBRANE_TRANSPORT	GO_ZINC_ION_TRANSMEMBRANE_TRANSPORT		19	0.571996	1.42364	0	0.223248	1	2402	tags=21%, list=11%, signal=24%
GO_NEGATIVE_REGULATION_OF_CELLULAR_AMIDE_METABOLIC_PROCESS	GO_NEGATIVE_REGULATION_OF_CELLULAR_AMIDE_METABOLIC_PROCESS		141	0.282791	1.42336	0	0.222939	1	130	tags=2%, list=1%, signal=2%
GO_REGULATION_OF_FATTY_ACID_BIOSYNTHETIC_PROCESS	GO_REGULATION_OF_FATTY_ACID_BIOSYNTHETIC_PROCESS		34	0.540389	1.42238	0	0.22391	1	1596	tags=12%, list=7%, signal=13%
GO_SH2_DOMAIN_BINDING	GO_SH2_DOMAIN_BINDING		29	0.602113	1.42185	0	0.224333	1	2956	tags=28%, list=14%, signal=32%
GO_PHOSPHOLIPASE_ACTIVITY	GO_PHOSPHOLIPASE_ACTIVITY		67	0.458944	1.42171	0	0.224179	1	1983	tags=16%, list=9%, signal=18%
GO_TRANSPORT_VESICLE	GO_TRANSPORT_VESICLE		338	0.321322	1.42153	0	0.224092	1	1337	tags=7%, list=6%, signal=8%
GO_REGULATION_OF_EXOCYTOSIS	GO_REGULATION_OF_EXOCYTOSIS		177	0.348538	1.42145	0	0.224012	1	1133	tags=11%, list=5%, signal=11%
GO_REGULATION_OF_LYASE_ACTIVITY	GO_REGULATION_OF_LYASE_ACTIVITY		30	0.45683	1.42114	0	0.223931	1	1062	tags=13%, list=5%, signal=14%
GO_ESTABLISHMENT_OF_PROTEIN_LOCALIZATION_TO_PLASMA_MEMBRANE	GO_ESTABLISHMENT_OF_PROTEIN_LOCALIZATION_TO_PLASMA_MEMBRANE		53	0.391048	1.4206	0.0968379	0.2245	1	1603	tags=8%, list=8%, signal=8%
GO_POSITIVE_REGULATION_OF_LEUKOCYTE_CHEMOTAXIS	GO_POSITIVE_REGULATION_OF_LEUKOCYTE_CHEMOTAXIS		53	0.541094	1.42002	0	0.225131	1	2705	tags=28%, list=13%, signal=32%
GO_TRANSITION_METAL_ION_TRANSPORT	GO_TRANSITION_METAL_ION_TRANSPORT		101	0.359368	1.41959	0	0.225268	1	3392	tags=15%, list=16%, signal=18%
GO_FC_RECEPTOR_SIGNALING_PATHWAY	GO_FC_RECEPTOR_SIGNALING_PATHWAY		161	0.407202	1.41902	0	0.226254	1	2699	tags=11%, list=13%, signal=13%
GO_CADHERIN_BINDING_INVOLVED_IN_CELL_CELL_ADHESION	GO_CADHERIN_BINDING_INVOLVED_IN_CELL_CELL_ADHESION		18	0.546303	1.41863	0.192381	0.226897	1	182	tags=6%, list=1%, signal=6%
GO_MITOCHONDRION_MORPHOGENESIS	GO_MITOCHONDRION_MORPHOGENESIS		20	0.446849	1.4183	0.185417	0.226964	1	668	tags=5%, list=3%, signal=5%
GO_REGULATION_OF_VIRAL_ENTRY_INTO_HOST_CELL	GO_REGULATION_OF_VIRAL_ENTRY_INTO_HOST_CELL		23	0.720644	1.41827	0	0.22678	1	1392	tags=22%, list=7%, signal=23%
GO_NEUTRAL_LIPID_BIOSYNTHETIC_PROCESS	GO_NEUTRAL_LIPID_BIOSYNTHETIC_PROCESS		30	0.579456	1.41766	0.102	0.226803	1	3398	tags=23%, list=16%, signal=28%
GO_B_CELL_HOMEOSTASIS	GO_B_CELL_HOMEOSTASIS		26	0.62395	1.41736	0	0.22683	1	3265	tags=27%, list=15%, signal=32%
GO_RNA_POLYMERASE_COMPLEX	GO_RNA_POLYMERASE_COMPLEX		104	0.283259	1.41708	0	0.226938	1	7867	tags=30%, list=37%, signal=47%
GO_NEGATIVE_REGULATION_OF_RESPONSE_TO_EXTERNAL_STIMULUS	GO_NEGATIVE_REGULATION_OF_RESPONSE_TO_EXTERNAL_STIMULUS		238	0.481406	1.41698	0	0.226742	1	2983	tags=24%, list=14%, signal=27%
GO_POSITIVE_REGULATION_OF_KINASE_ACTIVITY	GO_POSITIVE_REGULATION_OF_KINASE_ACTIVITY		488	0.308235	1.41659	0	0.226651	1	1980	tags=10%, list=9%, signal=11%
GO_HOMOTYPIC_CELL_CELL_ADHESION	GO_HOMOTYPIC_CELL_CELL_ADHESION		63	0.403993	1.41633	0	0.226593	1	2023	tags=17%, list=9%, signal=19%
GO_RESPONSE_TO_TOPOLOGICALLY_INCORRECT_PROTEIN	GO_RESPONSE_TO_TOPOLOGICALLY_INCORRECT_PROTEIN		179	0.242306	1.41618	0	0.226412	1	2699	tags=7%, list=13%, signal=8%
GO_POSITIVE_REGULATION_OF_INTERLEUKIN_2_PRODUCTION	GO_POSITIVE_REGULATION_OF_INTERLEUKIN_2_PRODUCTION		22	0.773787	1.41606	0	0.226109	1	2027	tags=27%, list=9%, signal=30%
GO_CELL_CYCLE_G1_S_PHASE_TRANSITION	GO_CELL_CYCLE_G1_S_PHASE_TRANSITION		241	0.259806	1.41602	0	0.225807	1	1323	tags=5%, list=6%, signal=5%
GO_MONOCARBOXYLIC_ACID_BINDING	GO_MONOCARBOXYLIC_ACID_BINDING		49	0.473355	1.41594	0	0.225656	1	1030	tags=12%, list=5%, signal=13%
GO_CELLULAR_PROTEIN_COMPLEX_DISASSEMBLY	GO_CELLULAR_PROTEIN_COMPLEX_DISASSEMBLY		205	0.276902	1.41587	0	0.225356	1	2269	tags=6%, list=11%, signal=6%
GO_MIDDLE_EAR_MORPHOGENESIS	GO_MIDDLE_EAR_MORPHOGENESIS		20	0.418318	1.41553	0	0.225745	1	924	tags=10%, list=4%, signal=10%
GO_REGULATION_OF_ACTIN_FILAMENT_ORGANIZATION	GO_REGULATION_OF_ACTIN_FILAMENT_ORGANIZATION		227	0.318918	1.4154	0	0.225716	1	2818	tags=12%, list=13%, signal=14%
GO_PROCESS_UTILIZING_AUTOPHAGIC_MECHANISM	GO_PROCESS_UTILIZING_AUTOPHAGIC_MECHANISM		445	0.217448	1.41524	0	0.22552	1	3392	tags=9%, list=16%, signal=10%
GO_DEFENSE_RESPONSE_TO_VIRUS	GO_DEFENSE_RESPONSE_TO_VIRUS		170	0.372266	1.41424	0	0.226317	1	1119	tags=7%, list=5%, signal=7%
GO_ANTIGEN_PROCESSING_AND_PRESENTATION_OF_ENDOGENOUS_ANTIGEN	GO_ANTIGEN_PROCESSING_AND_PRESENTATION_OF_ENDOGENOUS_ANTIGEN		16	0.801838	1.41375	0	0.227117	1	95	tags=13%, list=0%, signal=13%
GO_COLLAGEN_TRIMER	GO_COLLAGEN_TRIMER		61	0.722072	1.41366	0	0.227017	1	1680	tags=38%, list=8%, signal=41%
GO_STEROID_BIOSYNTHETIC_PROCESS	GO_STEROID_BIOSYNTHETIC_PROCESS		149	0.328666	1.41357	0	0.226938	1	1381	tags=7%, list=6%, signal=7%
GO_MOLECULAR_ADAPTOR_ACTIVITY	GO_MOLECULAR_ADAPTOR_ACTIVITY		185	0.349592	1.41347	0	0.22664	1	2961	tags=14%, list=14%, signal=16%
GO_NEGATIVE_REGULATION_OF_LYMPHOCYTE_APOPTOTIC_PROCESS	GO_NEGATIVE_REGULATION_OF_LYMPHOCYTE_APOPTOTIC_PROCESS		26	0.804166	1.41302	0	0.227221	1	720	tags=23%, list=3%, signal=24%
GO_AMINO_ACID_BINDING	GO_AMINO_ACID_BINDING		44	0.492503	1.41256	0	0.227571	1	636	tags=9%, list=3%, signal=9%
GO_RNA_DESTABILIZATION	GO_RNA_DESTABILIZATION		31	0.449494	1.41253	0	0.227273	1	7593	tags=55%, list=36%, signal=85%
GO_ALDO_KETO_REDUCTASE_NADP_ACTIVITY	GO_ALDO_KETO_REDUCTASE_NADP_ACTIVITY		18	0.662542	1.41186	0	0.227954	1	772	tags=17%, list=4%, signal=17%
GO_RESPONSE_TO_KETONE	GO_RESPONSE_TO_KETONE		164	0.407497	1.41129	0	0.228108	1	2140	tags=13%, list=10%, signal=14%
GO_REGULATION_OF_VESICLE_MEDIATED_TRANSPORT	GO_REGULATION_OF_VESICLE_MEDIATED_TRANSPORT		434	0.335963	1.41076	0	0.228257	1	2390	tags=13%, list=11%, signal=14%
GO_REGULATION_OF_INTRINSIC_APOPTOTIC_SIGNALING_PATHWAY_IN_RESPONSE_TO_DNA_DAMAGE_BY_P53_CLASS_MEDIATOR	GO_REGULATION_OF_INTRINSIC_APOPTOTIC_SIGNALING_PATHWAY_IN_RESPONSE_TO_DNA_DAMAGE_BY_P53_CLASS_MEDIATOR		16	0.65472	1.41003	0	0.228791	1	4509	tags=31%, list=21%, signal=40%
GO_MONONUCLEAR_CELL_DIFFERENTIATION	GO_MONONUCLEAR_CELL_DIFFERENTIATION		29	0.508094	1.41	0	0.228494	1	709	tags=10%, list=3%, signal=11%
GO_PROTEIN_DEPOLYMERIZATION	GO_PROTEIN_DEPOLYMERIZATION		97	0.411506	1.40973	0	0.228415	1	2269	tags=12%, list=11%, signal=14%
GO_METANEPHROS_MORPHOGENESIS	GO_METANEPHROS_MORPHOGENESIS		30	0.522628	1.40962	0	0.228237	1	1168	tags=20%, list=5%, signal=21%
GO_RESPONSE_TO_INTERLEUKIN_12	GO_RESPONSE_TO_INTERLEUKIN_12		43	0.522725	1.40957	0.125	0.227942	1	3288	tags=19%, list=15%, signal=22%
GO_POSITIVE_REGULATION_OF_PEPTIDE_SECRETION	GO_POSITIVE_REGULATION_OF_PEPTIDE_SECRETION		194	0.415499	1.40929	0	0.228277	1	2135	tags=17%, list=10%, signal=19%
GO_POSITIVE_REGULATION_OF_NUCLEOBASE_CONTAINING_COMPOUND_METABOLIC_PROCESS	GO_POSITIVE_REGULATION_OF_NUCLEOBASE_CONTAINING_COMPOUND_METABOLIC_PROCESS		208	0.26879	1.40855	0	0.229524	1	1108	tags=2%, list=5%, signal=3%
GO_CELLULAR_RESPONSE_TO_INSULIN_STIMULUS	GO_CELLULAR_RESPONSE_TO_INSULIN_STIMULUS		184	0.418078	1.4083	0	0.229441	1	3668	tags=16%, list=17%, signal=20%
GO_LENS_MORPHOGENESIS_IN_CAMERA_TYPE_EYE	GO_LENS_MORPHOGENESIS_IN_CAMERA_TYPE_EYE		19	0.561788	1.40816	0.0865979	0.229301	1	125	tags=5%, list=1%, signal=5%
GO_EXTRINSIC_APOPTOTIC_SIGNALING_PATHWAY	GO_EXTRINSIC_APOPTOTIC_SIGNALING_PATHWAY		194	0.329023	1.40758	0	0.229642	1	3027	tags=12%, list=14%, signal=14%
GO_REGULATION_OF_ACTIN_NUCLEATION	GO_REGULATION_OF_ACTIN_NUCLEATION		28	0.53318	1.40705	0	0.229754	1	1526	tags=18%, list=7%, signal=19%
GO_PIGMENT_CELL_DIFFERENTIATION	GO_PIGMENT_CELL_DIFFERENTIATION		31	0.446361	1.40648	0	0.230609	1	854	tags=10%, list=4%, signal=10%
GO_ANTIGEN_BINDING	GO_ANTIGEN_BINDING		34	0.574614	1.40615	0	0.23105	1	1865	tags=18%, list=9%, signal=19%
GO_POSITIVE_REGULATION_OF_T_CELL_PROLIFERATION	GO_POSITIVE_REGULATION_OF_T_CELL_PROLIFERATION		60	0.538764	1.40577	0	0.231305	1	1723	tags=22%, list=8%, signal=24%
GO_POSITIVE_REGULATION_OF_CELL_ACTIVATION	GO_POSITIVE_REGULATION_OF_CELL_ACTIVATION		227	0.450727	1.40512	0	0.23178	1	2223	tags=18%, list=10%, signal=20%
GO_TRANSFERASE_ACTIVITY_TRANSFERRING_PENTOSYL_GROUPS	GO_TRANSFERASE_ACTIVITY_TRANSFERRING_PENTOSYL_GROUPS		38	0.477678	1.40505	0	0.231485	1	3598	tags=16%, list=17%, signal=19%
GO_RESPONSE_TO_NICOTINE	GO_RESPONSE_TO_NICOTINE		37	0.551071	1.40502	0	0.231373	1	2198	tags=24%, list=10%, signal=27%
GO_PROTEIN_HOMOTETRAMERIZATION	GO_PROTEIN_HOMOTETRAMERIZATION		74	0.447363	1.40481	0	0.231278	1	1249	tags=8%, list=6%, signal=9%
GO_B_CELL_ACTIVATION	GO_B_CELL_ACTIVATION		174	0.466983	1.40477	0	0.231094	1	1571	tags=16%, list=7%, signal=17%
GO_MHC_PROTEIN_BINDING	GO_MHC_PROTEIN_BINDING		18	0.766866	1.40469	0	0.230801	1	298	tags=17%, list=1%, signal=17%
GO_POSITIVE_REGULATION_OF_COLLAGEN_BIOSYNTHETIC_PROCESS	GO_POSITIVE_REGULATION_OF_COLLAGEN_BIOSYNTHETIC_PROCESS		21	0.74082	1.40411	0	0.231007	1	2818	tags=33%, list=13%, signal=38%
GO_KIDNEY_MORPHOGENESIS	GO_KIDNEY_MORPHOGENESIS		87	0.409223	1.40409	0	0.230829	1	1168	tags=11%, list=5%, signal=12%
GO_POSITIVE_REGULATION_OF_PEPTIDYL_THREONINE_PHOSPHORYLATION	GO_POSITIVE_REGULATION_OF_PEPTIDYL_THREONINE_PHOSPHORYLATION		25	0.525228	1.40408	0	0.230539	1	2653	tags=20%, list=12%, signal=23%
GO_REGULATION_OF_BINDING	GO_REGULATION_OF_BINDING		332	0.273828	1.40399	0	0.230553	1	2697	tags=9%, list=13%, signal=11%
GO_RESPONSE_TO_INSULIN	GO_RESPONSE_TO_INSULIN		229	0.387172	1.40374	0	0.230723	1	3558	tags=16%, list=17%, signal=19%
GO_NEGATIVE_REGULATION_OF_GLIOGENESIS	GO_NEGATIVE_REGULATION_OF_GLIOGENESIS		33	0.636252	1.40372	0	0.230433	1	1808	tags=24%, list=8%, signal=26%
GO_CYSTEINE_TYPE_ENDOPEPTIDASE_INHIBITOR_ACTIVITY_INVOLVED_IN_APOPTOTIC_PROCESS	GO_CYSTEINE_TYPE_ENDOPEPTIDASE_INHIBITOR_ACTIVITY_INVOLVED_IN_APOPTOTIC_PROCESS		19	0.591928	1.40365	0.107422	0.230601	1	1465	tags=21%, list=7%, signal=23%
GO_REGULATION_OF_HEART_RATE	GO_REGULATION_OF_HEART_RATE		77	0.46782	1.40351	0	0.230646	1	1337	tags=21%, list=6%, signal=22%
GO_NUCLEOSIDE_METABOLIC_PROCESS	GO_NUCLEOSIDE_METABOLIC_PROCESS		46	0.359501	1.40336	0.0836653	0.230792	1	3654	tags=15%, list=17%, signal=18%
GO_POSITIVE_REGULATION_OF_MITOTIC_NUCLEAR_DIVISION	GO_POSITIVE_REGULATION_OF_MITOTIC_NUCLEAR_DIVISION		45	0.428728	1.40317	0	0.230611	1	556	tags=7%, list=3%, signal=7%
GO_COPII_COATED_ER_TO_GOLGI_TRANSPORT_VESICLE	GO_COPII_COATED_ER_TO_GOLGI_TRANSPORT_VESICLE		79	0.379011	1.4023	0.106178	0.231071	1	1873	tags=8%, list=9%, signal=8%
GO_ANTIPORTER_ACTIVITY	GO_ANTIPORTER_ACTIVITY		73	0.457395	1.40218	0	0.230784	1	3025	tags=25%, list=14%, signal=29%
GO_ENDOTHELIUM_DEVELOPMENT	GO_ENDOTHELIUM_DEVELOPMENT		100	0.439377	1.40196	0	0.23082	1	2572	tags=14%, list=12%, signal=16%
GO_REGULATION_OF_EXTRINSIC_APOPTOTIC_SIGNALING_PATHWAY	GO_REGULATION_OF_EXTRINSIC_APOPTOTIC_SIGNALING_PATHWAY		134	0.340556	1.40185	0	0.230535	1	1712	tags=7%, list=8%, signal=8%
GO_POSITIVE_REGULATION_OF_PROTEIN_COMPLEX_ASSEMBLY	GO_POSITIVE_REGULATION_OF_PROTEIN_COMPLEX_ASSEMBLY		217	0.294804	1.40163	0	0.230619	1	1526	tags=7%, list=7%, signal=7%
GO_DRUG_TRANSPORT	GO_DRUG_TRANSPORT		148	0.392351	1.401	0	0.231276	1	2198	tags=20%, list=10%, signal=22%
GO_RENAL_TUBULE_DEVELOPMENT	GO_RENAL_TUBULE_DEVELOPMENT		87	0.423103	1.40042	0	0.231963	1	1168	tags=13%, list=5%, signal=13%
GO_REGULATION_OF_MICROTUBULE_POLYMERIZATION_OR_DEPOLYMERIZATION	GO_REGULATION_OF_MICROTUBULE_POLYMERIZATION_OR_DEPOLYMERIZATION		69	0.375662	1.40034	0	0.231778	1	911	tags=6%, list=4%, signal=6%
GO_HYDROLASE_ACTIVITY_HYDROLYZING_O_GLYCOSYL_COMPOUNDS	GO_HYDROLASE_ACTIVITY_HYDROLYZING_O_GLYCOSYL_COMPOUNDS		66	0.490706	1.40029	0	0.231678	1	2675	tags=18%, list=13%, signal=21%
GO_PEPTIDYL_SERINE_DEPHOSPHORYLATION	GO_PEPTIDYL_SERINE_DEPHOSPHORYLATION		18	0.689713	1.40016	0.0820312	0.231487	1	2551	tags=17%, list=12%, signal=19%
GO_POSITIVE_REGULATION_OF_NF_KAPPAB_TRANSCRIPTION_FACTOR_ACTIVITY	GO_POSITIVE_REGULATION_OF_NF_KAPPAB_TRANSCRIPTION_FACTOR_ACTIVITY		125	0.412375	1.40009	0	0.231203	1	1034	tags=11%, list=5%, signal=12%
GO_MESONEPHROS_DEVELOPMENT	GO_MESONEPHROS_DEVELOPMENT		94	0.441328	1.39972	0	0.231365	1	1782	tags=15%, list=8%, signal=16%
GO_REGULATION_OF_MULTI_ORGANISM_PROCESS	GO_REGULATION_OF_MULTI_ORGANISM_PROCESS		306	0.332013	1.39971	0	0.231231	1	3952	tags=15%, list=19%, signal=18%
GO_POSITIVE_REGULATION_OF_NEURAL_PRECURSOR_CELL_PROLIFERATION	GO_POSITIVE_REGULATION_OF_NEURAL_PRECURSOR_CELL_PROLIFERATION		44	0.465476	1.39952	0	0.231339	1	1325	tags=16%, list=6%, signal=17%
GO_AMINOGLYCAN_BIOSYNTHETIC_PROCESS	GO_AMINOGLYCAN_BIOSYNTHETIC_PROCESS		101	0.460303	1.39944	0	0.231058	1	3556	tags=25%, list=17%, signal=30%
GO_HETEROCHROMATIN	GO_HETEROCHROMATIN		74	0.296315	1.39924	0.212724	0.230978	1	3426	tags=9%, list=16%, signal=11%
GO_CHLORIDE_CHANNEL_REGULATOR_ACTIVITY	GO_CHLORIDE_CHANNEL_REGULATOR_ACTIVITY		15	0.650601	1.39891	0	0.231506	1	93	tags=13%, list=0%, signal=13%
GO_POSITIVE_REGULATION_OF_CELL_CELL_ADHESION	GO_POSITIVE_REGULATION_OF_CELL_CELL_ADHESION		181	0.501227	1.39856	0	0.231537	1	2223	tags=21%, list=10%, signal=23%
GO_HEART_VALVE_DEVELOPMENT	GO_HEART_VALVE_DEVELOPMENT		54	0.500206	1.39839	0	0.231583	1	1122	tags=13%, list=5%, signal=14%
GO_POSITIVE_REGULATION_OF_AXON_EXTENSION	GO_POSITIVE_REGULATION_OF_AXON_EXTENSION		38	0.415091	1.39823	0	0.231483	1	2220	tags=13%, list=10%, signal=15%
GO_REGULATION_OF_NEUTROPHIL_MIGRATION	GO_REGULATION_OF_NEUTROPHIL_MIGRATION		21	0.608554	1.39807	0	0.231657	1	1886	tags=33%, list=9%, signal=37%
GO_STEROL_HOMEOSTASIS	GO_STEROL_HOMEOSTASIS		55	0.502675	1.39747	0	0.232143	1	2913	tags=22%, list=14%, signal=25%
GO_CARDIAC_MUSCLE_CELL_MEMBRANE_REPOLARIZATION	GO_CARDIAC_MUSCLE_CELL_MEMBRANE_REPOLARIZATION		31	0.582085	1.39721	0	0.23216	1	1226	tags=23%, list=6%, signal=24%
GO_EXOPEPTIDASE_ACTIVITY	GO_EXOPEPTIDASE_ACTIVITY		87	0.37392	1.39721	0	0.231881	1	1332	tags=10%, list=6%, signal=11%
GO_PHAGOCYTIC_CUP	GO_PHAGOCYTIC_CUP		20	0.684244	1.39713	0	0.231774	1	1603	tags=30%, list=8%, signal=32%
GO_MITOCHONDRIAL_TRANSMEMBRANE_TRANSPORT	GO_MITOCHONDRIAL_TRANSMEMBRANE_TRANSPORT		71	0.344079	1.39692	0.0959184	0.231586	1	1079	tags=4%, list=5%, signal=4%
GO_NUCLEAR_PORE	GO_NUCLEAR_PORE		79	0.317378	1.3964	0	0.232239	1	7999	tags=29%, list=37%, signal=46%
GO_NEPHRON_MORPHOGENESIS	GO_NEPHRON_MORPHOGENESIS		72	0.465592	1.39632	0	0.232052	1	1168	tags=13%, list=5%, signal=13%
GO_FC_RECEPTOR_MEDIATED_STIMULATORY_SIGNALING_PATHWAY	GO_FC_RECEPTOR_MEDIATED_STIMULATORY_SIGNALING_PATHWAY		75	0.419731	1.39613	0	0.232073	1	1711	tags=12%, list=8%, signal=13%
GO_NEGATIVE_REGULATION_OF_BMP_SIGNALING_PATHWAY	GO_NEGATIVE_REGULATION_OF_BMP_SIGNALING_PATHWAY		35	0.414429	1.39564	0	0.232508	1	412	tags=9%, list=2%, signal=9%
GO_PURINE_NUCLEOSIDE_BIOSYNTHETIC_PROCESS	GO_PURINE_NUCLEOSIDE_BIOSYNTHETIC_PROCESS		21	0.583281	1.39561	0.0761719	0.23231	1	2164	tags=19%, list=10%, signal=21%
GO_POSITIVE_REGULATION_OF_CYTOKINE_SECRETION	GO_POSITIVE_REGULATION_OF_CYTOKINE_SECRETION		79	0.47529	1.39551	0	0.232034	1	911	tags=15%, list=4%, signal=16%
GO_ENDOTHELIAL_CELL_APOPTOTIC_PROCESS	GO_ENDOTHELIAL_CELL_APOPTOTIC_PROCESS		40	0.507464	1.39536	0	0.232105	1	2414	tags=23%, list=11%, signal=25%
GO_METAL_CLUSTER_BINDING	GO_METAL_CLUSTER_BINDING		61	0.415714	1.39506	0.121094	0.23231	1	1192	tags=7%, list=6%, signal=7%
GO_HEPATICOBILIARY_SYSTEM_DEVELOPMENT	GO_HEPATICOBILIARY_SYSTEM_DEVELOPMENT		122	0.281789	1.39488	0	0.232142	1	2459	tags=9%, list=12%, signal=10%
GO_PROTEIN_TRANSMEMBRANE_IMPORT_INTO_INTRACELLULAR_ORGANELLE	GO_PROTEIN_TRANSMEMBRANE_IMPORT_INTO_INTRACELLULAR_ORGANELLE		33	0.416387	1.39456	0	0.232356	1	1079	tags=6%, list=5%, signal=6%
GO_LYMPHOCYTE_APOPTOTIC_PROCESS	GO_LYMPHOCYTE_APOPTOTIC_PROCESS		54	0.658076	1.39389	0	0.233343	1	720	tags=13%, list=3%, signal=13%
GO_PHOSPHOLIPID_BIOSYNTHETIC_PROCESS	GO_PHOSPHOLIPID_BIOSYNTHETIC_PROCESS		211	0.23522	1.39375	0	0.233256	1	1711	tags=4%, list=8%, signal=5%
GO_PULMONARY_VALVE_DEVELOPMENT	GO_PULMONARY_VALVE_DEVELOPMENT		19	0.655084	1.39302	0.077381	0.233791	1	3407	tags=21%, list=16%, signal=25%
GO_IMMUNOGLOBULIN_PRODUCTION	GO_IMMUNOGLOBULIN_PRODUCTION		75	0.460826	1.39279	0.079918	0.233839	1	655	tags=5%, list=3%, signal=5%
GO_PROTEIN_PHOSPHATASE_1_BINDING	GO_PROTEIN_PHOSPHATASE_1_BINDING		17	0.76108	1.39229	0	0.23405	1	1725	tags=24%, list=8%, signal=26%
GO_SENSORY_ORGAN_DEVELOPMENT	GO_SENSORY_ORGAN_DEVELOPMENT		454	0.351127	1.39185	0	0.234754	1	2709	tags=16%, list=13%, signal=18%
GO_BLOOD_VESSEL_MORPHOGENESIS	GO_BLOOD_VESSEL_MORPHOGENESIS		478	0.346418	1.39162	0	0.234659	1	2725	tags=17%, list=13%, signal=19%
GO_PHAGOSOME_MATURATION	GO_PHAGOSOME_MATURATION		41	0.457741	1.39157	0	0.234384	1	3392	tags=22%, list=16%, signal=26%
GO_REGULATION_OF_PROTEIN_CATABOLIC_PROCESS	GO_REGULATION_OF_PROTEIN_CATABOLIC_PROCESS		341	0.280253	1.3914	0.0778443	0.2342	1	2935	tags=7%, list=14%, signal=8%
GO_TRANS_GOLGI_NETWORK_TRANSPORT_VESICLE	GO_TRANS_GOLGI_NETWORK_TRANSPORT_VESICLE		29	0.33054	1.39115	0.0884086	0.23435	1	157	tags=3%, list=1%, signal=3%
GO_OVULATION_CYCLE	GO_OVULATION_CYCLE		53	0.407534	1.39105	0	0.234077	1	1164	tags=13%, list=5%, signal=14%
GO_REGULATION_OF_PROTEIN_SERINE_THREONINE_KINASE_ACTIVITY	GO_REGULATION_OF_PROTEIN_SERINE_THREONINE_KINASE_ACTIVITY		440	0.273973	1.39083	0	0.234174	1	2914	tags=11%, list=14%, signal=12%
GO_DRUG_METABOLIC_PROCESS	GO_DRUG_METABOLIC_PROCESS		248	0.36887	1.39071	0	0.23427	1	1639	tags=11%, list=8%, signal=12%
GO_OXIDOREDUCTASE_ACTIVITY_ACTING_ON_THE_CH_CH_GROUP_OF_DONORS	GO_OXIDOREDUCTASE_ACTIVITY_ACTING_ON_THE_CH_CH_GROUP_OF_DONORS		55	0.496418	1.3906	0.102616	0.233998	1	772	tags=5%, list=4%, signal=6%
GO_POSITIVE_REGULATION_OF_MAPK_CASCADE	GO_POSITIVE_REGULATION_OF_MAPK_CASCADE		405	0.366746	1.39031	0	0.233892	1	1895	tags=14%, list=9%, signal=15%
GO_COMPLEX_OF_COLLAGEN_TRIMERS	GO_COMPLEX_OF_COLLAGEN_TRIMERS		18	0.650331	1.39028	0	0.233622	1	1626	tags=17%, list=8%, signal=18%
GO_SIGNALING_ADAPTOR_ACTIVITY	GO_SIGNALING_ADAPTOR_ACTIVITY		68	0.511842	1.39003	0	0.233673	1	2961	tags=19%, list=14%, signal=22%
GO_LYMPHOCYTE_COSTIMULATION	GO_LYMPHOCYTE_COSTIMULATION		35	0.709831	1.38967	0	0.234045	1	1750	tags=23%, list=8%, signal=25%
GO_CELLULAR_ION_HOMEOSTASIS	GO_CELLULAR_ION_HOMEOSTASIS		472	0.367946	1.38965	0	0.233776	1	2727	tags=17%, list=13%, signal=19%
GO_DISTAL_AXON	GO_DISTAL_AXON		247	0.33845	1.38932	0	0.233997	1	2925	tags=16%, list=14%, signal=18%
GO_RESPONSE_TO_EXTRACELLULAR_STIMULUS	GO_RESPONSE_TO_EXTRACELLULAR_STIMULUS		426	0.304359	1.38927	0	0.233833	1	2459	tags=11%, list=12%, signal=12%
GO_INTERLEUKIN_2_PRODUCTION	GO_INTERLEUKIN_2_PRODUCTION		50	0.589262	1.38926	0.0947581	0.233565	1	1571	tags=24%, list=7%, signal=26%
GO_INTRINSIC_APOPTOTIC_SIGNALING_PATHWAY_IN_RESPONSE_TO_DNA_DAMAGE	GO_INTRINSIC_APOPTOTIC_SIGNALING_PATHWAY_IN_RESPONSE_TO_DNA_DAMAGE		90	0.44485	1.38898	0	0.233517	1	3472	tags=14%, list=16%, signal=17%
GO_REGULATION_OF_CYCLASE_ACTIVITY	GO_REGULATION_OF_CYCLASE_ACTIVITY		29	0.457107	1.38853	0	0.233963	1	1062	tags=14%, list=5%, signal=14%
GO_POSITIVE_REGULATION_OF_PROTEIN_MODIFICATION_BY_SMALL_PROTEIN_CONJUGATION_OR_REMOVAL	GO_POSITIVE_REGULATION_OF_PROTEIN_MODIFICATION_BY_SMALL_PROTEIN_CONJUGATION_OR_REMOVAL		115	0.339144	1.38829	0	0.233906	1	5516	tags=23%, list=26%, signal=30%
GO_TAU_PROTEIN_KINASE_ACTIVITY	GO_TAU_PROTEIN_KINASE_ACTIVITY		22	0.478677	1.38829	0	0.233639	1	1394	tags=9%, list=7%, signal=10%
GO_ANTIGEN_RECEPTOR_MEDIATED_SIGNALING_PATHWAY	GO_ANTIGEN_RECEPTOR_MEDIATED_SIGNALING_PATHWAY		186	0.449297	1.38823	0	0.233457	1	2712	tags=15%, list=13%, signal=16%
GO_REGULATION_OF_STEROID_BIOSYNTHETIC_PROCESS	GO_REGULATION_OF_STEROID_BIOSYNTHETIC_PROCESS		76	0.370045	1.38801	0.110251	0.233587	1	1305	tags=7%, list=6%, signal=7%
GO_REGULATION_OF_FAT_CELL_DIFFERENTIATION	GO_REGULATION_OF_FAT_CELL_DIFFERENTIATION		107	0.390961	1.38781	0	0.233412	1	1596	tags=11%, list=7%, signal=12%
GO_MELANOCYTE_DIFFERENTIATION	GO_MELANOCYTE_DIFFERENTIATION		21	0.503578	1.38752	0.0959184	0.233542	1	854	tags=14%, list=4%, signal=15%
GO_EXTRACELLULAR_STRUCTURE_ORGANIZATION	GO_EXTRACELLULAR_STRUCTURE_ORGANIZATION		342	0.432256	1.38707	0	0.23441	1	1886	tags=17%, list=9%, signal=18%
GO_EXCITATORY_EXTRACELLULAR_LIGAND_GATED_ION_CHANNEL_ACTIVITY	GO_EXCITATORY_EXTRACELLULAR_LIGAND_GATED_ION_CHANNEL_ACTIVITY		21	0.514416	1.38693	0	0.234232	1	1961	tags=24%, list=9%, signal=26%
GO_REGULATION_OF_LYMPHOCYTE_APOPTOTIC_PROCESS	GO_REGULATION_OF_LYMPHOCYTE_APOPTOTIC_PROCESS		42	0.689722	1.38627	0	0.234917	1	1886	tags=21%, list=9%, signal=23%
GO_REGULATION_OF_ARP2_3_COMPLEX_MEDIATED_ACTIN_NUCLEATION	GO_REGULATION_OF_ARP2_3_COMPLEX_MEDIATED_ACTIN_NUCLEATION		16	0.630629	1.38626	0	0.234653	1	1526	tags=13%, list=7%, signal=13%
GO_POSITIVE_REGULATION_OF_PROTEIN_CATABOLIC_PROCESS	GO_POSITIVE_REGULATION_OF_PROTEIN_CATABOLIC_PROCESS		191	0.30014	1.38616	0.124498	0.234556	1	2016	tags=5%, list=9%, signal=6%
GO_CELL_LEADING_EDGE	GO_CELL_LEADING_EDGE		362	0.265036	1.38535	0	0.23498	1	2285	tags=10%, list=11%, signal=11%
GO_MYELOID_CELL_DIFFERENTIATION	GO_MYELOID_CELL_DIFFERENTIATION		336	0.306114	1.38533	0	0.234716	1	1980	tags=10%, list=9%, signal=10%
GO_VESICLE_LUMEN	GO_VESICLE_LUMEN		255	0.303143	1.3853	0	0.234537	1	2325	tags=9%, list=11%, signal=10%
GO_SULFUR_AMINO_ACID_METABOLIC_PROCESS	GO_SULFUR_AMINO_ACID_METABOLIC_PROCESS		15	0.659122	1.38512	0.0836653	0.234275	1	796	tags=13%, list=4%, signal=14%
GO_REGULATION_OF_PEPTIDYL_THREONINE_PHOSPHORYLATION	GO_REGULATION_OF_PEPTIDYL_THREONINE_PHOSPHORYLATION		38	0.379607	1.38469	0	0.234535	1	2653	tags=13%, list=12%, signal=15%
GO_RHO_PROTEIN_SIGNAL_TRANSDUCTION	GO_RHO_PROTEIN_SIGNAL_TRANSDUCTION		172	0.288945	1.38448	0	0.234547	1	1674	tags=9%, list=8%, signal=10%
GO_VENTRICULAR_TRABECULA_MYOCARDIUM_MORPHOGENESIS	GO_VENTRICULAR_TRABECULA_MYOCARDIUM_MORPHOGENESIS		15	0.760192	1.38407	0.0847784	0.235185	1	19	tags=7%, list=0%, signal=7%
GO_ZINC_ION_HOMEOSTASIS	GO_ZINC_ION_HOMEOSTASIS		24	0.654155	1.384	0	0.234924	1	1516	tags=21%, list=7%, signal=22%
GO_APICAL_PLASMA_MEMBRANE	GO_APICAL_PLASMA_MEMBRANE		227	0.402629	1.38351	0	0.235512	1	2426	tags=17%, list=11%, signal=19%
GO_ESTABLISHMENT_OR_MAINTENANCE_OF_MONOPOLAR_CELL_POLARITY	GO_ESTABLISHMENT_OR_MAINTENANCE_OF_MONOPOLAR_CELL_POLARITY		21	0.541081	1.38317	0.079918	0.235644	1	271	tags=10%, list=1%, signal=10%
GO_ALCOHOL_BIOSYNTHETIC_PROCESS	GO_ALCOHOL_BIOSYNTHETIC_PROCESS		143	0.408361	1.38313	0	0.235383	1	1381	tags=9%, list=6%, signal=10%
GO_CLUSTER_OF_ACTIN_BASED_CELL_PROJECTIONS	GO_CLUSTER_OF_ACTIN_BASED_CELL_PROJECTIONS		113	0.390687	1.38306	0	0.235122	1	1809	tags=14%, list=8%, signal=15%
GO_POSITIVE_REGULATION_OF_NEUTROPHIL_MIGRATION	GO_POSITIVE_REGULATION_OF_NEUTROPHIL_MIGRATION		17	0.635666	1.38246	0	0.236001	1	1886	tags=41%, list=9%, signal=45%
GO_NEPHRON_EPITHELIUM_DEVELOPMENT	GO_NEPHRON_EPITHELIUM_DEVELOPMENT		97	0.418234	1.38203	0	0.235828	1	1168	tags=12%, list=5%, signal=13%
GO_METAL_ION_HOMEOSTASIS	GO_METAL_ION_HOMEOSTASIS		459	0.373396	1.38171	0	0.236183	1	2727	tags=17%, list=13%, signal=19%
GO_ANTIBIOTIC_METABOLIC_PROCESS	GO_ANTIBIOTIC_METABOLIC_PROCESS		61	0.492888	1.38096	0	0.236521	1	2592	tags=23%, list=12%, signal=26%
GO_POSITIVE_REGULATION_OF_T_CELL_MEDIATED_CYTOTOXICITY	GO_POSITIVE_REGULATION_OF_T_CELL_MEDIATED_CYTOTOXICITY		16	0.604302	1.38082	0	0.2365	1	1865	tags=19%, list=9%, signal=21%
GO_REGULATION_OF_HORMONE_LEVELS	GO_REGULATION_OF_HORMONE_LEVELS		387	0.371545	1.3806	0	0.236379	1	2414	tags=18%, list=11%, signal=20%
GO_POSITIVE_REGULATION_OF_LEUKOCYTE_CELL_CELL_ADHESION	GO_POSITIVE_REGULATION_OF_LEUKOCYTE_CELL_CELL_ADHESION		152	0.547194	1.38037	0	0.23612	1	2223	tags=24%, list=10%, signal=26%
GO_ENDOPEPTIDASE_ACTIVITY	GO_ENDOPEPTIDASE_ACTIVITY		269	0.43145	1.3803	0	0.235936	1	2522	tags=16%, list=12%, signal=18%
GO_MOLTING_CYCLE_PROCESS	GO_MOLTING_CYCLE_PROCESS		75	0.371518	1.38021	0.0914761	0.235827	1	1137	tags=8%, list=5%, signal=8%
GO_PEPTIDASE_REGULATOR_ACTIVITY	GO_PEPTIDASE_REGULATOR_ACTIVITY		128	0.415757	1.38015	0	0.235569	1	1626	tags=13%, list=8%, signal=14%
GO_INTRACELLULAR_PROTEIN_TRANSMEMBRANE_TRANSPORT	GO_INTRACELLULAR_PROTEIN_TRANSMEMBRANE_TRANSPORT		51	0.34969	1.37945	0	0.236094	1	1079	tags=4%, list=5%, signal=4%
GO_POSITIVE_REGULATION_OF_VASCULATURE_DEVELOPMENT	GO_POSITIVE_REGULATION_OF_VASCULATURE_DEVELOPMENT		143	0.396864	1.37883	0	0.236609	1	1830	tags=15%, list=9%, signal=17%
GO_MEMORY	GO_MEMORY		97	0.435175	1.37878	0	0.23645	1	1666	tags=15%, list=8%, signal=17%
GO_POSITIVE_REGULATION_OF_CELL_JUNCTION_ASSEMBLY	GO_POSITIVE_REGULATION_OF_CELL_JUNCTION_ASSEMBLY		28	0.545764	1.37862	0	0.236459	1	1147	tags=14%, list=5%, signal=15%
GO_ROOF_OF_MOUTH_DEVELOPMENT	GO_ROOF_OF_MOUTH_DEVELOPMENT		84	0.333259	1.37826	0	0.236468	1	1351	tags=8%, list=6%, signal=9%
GO_REGULATION_OF_IMMUNOGLOBULIN_PRODUCTION	GO_REGULATION_OF_IMMUNOGLOBULIN_PRODUCTION		43	0.382488	1.37795	0	0.236686	1	1571	tags=7%, list=7%, signal=8%
GO_COENZYME_BIOSYNTHETIC_PROCESS	GO_COENZYME_BIOSYNTHETIC_PROCESS		137	0.280455	1.37788	0	0.236501	1	1597	tags=6%, list=7%, signal=6%
GO_MYELOID_LEUKOCYTE_CYTOKINE_PRODUCTION	GO_MYELOID_LEUKOCYTE_CYTOKINE_PRODUCTION		28	0.566518	1.37786	0	0.236245	1	1712	tags=25%, list=8%, signal=27%
GO_COFACTOR_BINDING	GO_COFACTOR_BINDING		395	0.329456	1.3776	0	0.236503	1	2609	tags=11%, list=12%, signal=12%
GO_POLYOL_BIOSYNTHETIC_PROCESS	GO_POLYOL_BIOSYNTHETIC_PROCESS		65	0.453807	1.37738	0	0.236668	1	861	tags=11%, list=4%, signal=11%
GO_POSITIVE_REGULATION_OF_RESPONSE_TO_OXIDATIVE_STRESS	GO_POSITIVE_REGULATION_OF_RESPONSE_TO_OXIDATIVE_STRESS		15	0.547788	1.37657	0	0.238562	1	632	tags=13%, list=3%, signal=14%
GO_REGULATION_OF_CYTOPLASMIC_TRANSPORT	GO_REGULATION_OF_CYTOPLASMIC_TRANSPORT		22	0.444563	1.37642	0	0.238829	1	116	tags=5%, list=1%, signal=5%
GO_EPITHELIAL_CELL_APOPTOTIC_PROCESS	GO_EPITHELIAL_CELL_APOPTOTIC_PROCESS		80	0.377637	1.37587	0	0.238897	1	2414	tags=15%, list=11%, signal=17%
GO_NEGATIVE_REGULATION_OF_LYASE_ACTIVITY	GO_NEGATIVE_REGULATION_OF_LYASE_ACTIVITY		15	0.562393	1.37577	0	0.238929	1	1062	tags=13%, list=5%, signal=14%
GO_NEURON_TO_NEURON_SYNAPSE	GO_NEURON_TO_NEURON_SYNAPSE		320	0.319069	1.37577	0	0.238673	1	1148	tags=10%, list=5%, signal=10%
GO_RESPONSE_TO_SALT	GO_RESPONSE_TO_SALT		17	0.569051	1.37569	0	0.238629	1	231	tags=12%, list=1%, signal=12%
GO_PROTEIN_PHOSPHATASE_TYPE_2A_COMPLEX	GO_PROTEIN_PHOSPHATASE_TYPE_2A_COMPLEX		19	0.581703	1.37563	0	0.238545	1	1918	tags=11%, list=9%, signal=12%
GO_REGULATION_OF_B_CELL_DIFFERENTIATION	GO_REGULATION_OF_B_CELL_DIFFERENTIATION		22	0.533943	1.37484	0.124	0.23918	1	1184	tags=18%, list=6%, signal=19%
GO_STRESS_ACTIVATED_PROTEIN_KINASE_SIGNALING_CASCADE	GO_STRESS_ACTIVATED_PROTEIN_KINASE_SIGNALING_CASCADE		259	0.29636	1.37449	0	0.239127	1	3485	tags=14%, list=16%, signal=16%
GO_ADHERENS_JUNCTION_ORGANIZATION	GO_ADHERENS_JUNCTION_ORGANIZATION		126	0.283121	1.37416	0	0.239109	1	2964	tags=13%, list=14%, signal=15%
GO_ACTIVATION_OF_PROTEIN_KINASE_ACTIVITY	GO_ACTIVATION_OF_PROTEIN_KINASE_ACTIVITY		289	0.340042	1.37389	0	0.239231	1	2964	tags=16%, list=14%, signal=18%
GO_LYMPHOCYTE_MIGRATION	GO_LYMPHOCYTE_MIGRATION		56	0.48942	1.37388	0.0770751	0.238977	1	2653	tags=32%, list=12%, signal=37%
GO_REGULATION_OF_GRANULOCYTE_CHEMOTAXIS	GO_REGULATION_OF_GRANULOCYTE_CHEMOTAXIS		26	0.526996	1.37371	0	0.238786	1	1866	tags=23%, list=9%, signal=25%
GO_KIDNEY_EPITHELIUM_DEVELOPMENT	GO_KIDNEY_EPITHELIUM_DEVELOPMENT		126	0.412666	1.3736	0	0.238612	1	3030	tags=21%, list=14%, signal=24%
GO_COGNITION	GO_COGNITION		243	0.368527	1.37347	0	0.238477	1	1666	tags=13%, list=8%, signal=14%
GO_DEVELOPMENTAL_PIGMENTATION	GO_DEVELOPMENTAL_PIGMENTATION		38	0.403807	1.37343	0	0.238224	1	1654	tags=11%, list=8%, signal=11%
GO_POSITIVE_REGULATION_OF_VASCULAR_ENDOTHELIAL_GROWTH_FACTOR_PRODUCTION	GO_POSITIVE_REGULATION_OF_VASCULAR_ENDOTHELIAL_GROWTH_FACTOR_PRODUCTION		21	0.54225	1.37336	0	0.238058	1	2675	tags=29%, list=13%, signal=33%
GO_METANEPHRIC_NEPHRON_MORPHOGENESIS	GO_METANEPHRIC_NEPHRON_MORPHOGENESIS		24	0.619115	1.37304	0	0.238328	1	1168	tags=21%, list=5%, signal=22%
GO_TRANSITION_METAL_ION_HOMEOSTASIS	GO_TRANSITION_METAL_ION_HOMEOSTASIS		106	0.491741	1.37304	0	0.238077	1	3266	tags=16%, list=15%, signal=19%
GO_LEUKOCYTE_APOPTOTIC_PROCESS	GO_LEUKOCYTE_APOPTOTIC_PROCESS		81	0.606606	1.37277	0	0.238026	1	3025	tags=23%, list=14%, signal=27%
GO_NEGATIVE_REGULATION_OF_DEFENSE_RESPONSE	GO_NEGATIVE_REGULATION_OF_DEFENSE_RESPONSE		136	0.414375	1.37238	0	0.238667	1	3247	tags=20%, list=15%, signal=23%
GO_CELL_MATRIX_ADHESION	GO_CELL_MATRIX_ADHESION		179	0.342642	1.37195	0	0.239338	1	1467	tags=9%, list=7%, signal=10%
GO_REGULATION_OF_TRANSMEMBRANE_RECEPTOR_PROTEIN_SERINE_THREONINE_KINASE_SIGNALING_PATHWAY	GO_REGULATION_OF_TRANSMEMBRANE_RECEPTOR_PROTEIN_SERINE_THREONINE_KINASE_SIGNALING_PATHWAY		187	0.330621	1.37158	0.0901639	0.239455	1	3790	tags=20%, list=18%, signal=24%
GO_POSITIVE_REGULATION_OF_NUCLEOTIDE_BIOSYNTHETIC_PROCESS	GO_POSITIVE_REGULATION_OF_NUCLEOTIDE_BIOSYNTHETIC_PROCESS		15	0.512232	1.37122	0	0.239365	1	1639	tags=20%, list=8%, signal=22%
GO_B_CELL_PROLIFERATION	GO_B_CELL_PROLIFERATION		49	0.471119	1.37078	0	0.240133	1	1370	tags=14%, list=6%, signal=15%
GO_TUBULIN_BINDING	GO_TUBULIN_BINDING		295	0.321447	1.37068	0	0.240048	1	2288	tags=8%, list=11%, signal=9%
GO_VITAMIN_B6_BINDING	GO_VITAMIN_B6_BINDING		39	0.462391	1.37017	0.115234	0.240516	1	1738	tags=13%, list=8%, signal=14%
GO_POSITIVE_REGULATION_OF_LYMPHOCYTE_DIFFERENTIATION	GO_POSITIVE_REGULATION_OF_LYMPHOCYTE_DIFFERENTIATION		68	0.390636	1.36996	0	0.240426	1	2223	tags=18%, list=10%, signal=20%
GO_PROTEIN_TRANSMEMBRANE_TRANSPORT	GO_PROTEIN_TRANSMEMBRANE_TRANSPORT		59	0.332882	1.36995	0	0.240175	1	1079	tags=3%, list=5%, signal=4%
GO_T_CELL_ACTIVATION	GO_T_CELL_ACTIVATION		316	0.485939	1.36971	0	0.24072	1	2712	tags=21%, list=13%, signal=24%
GO_POSITIVE_REGULATION_OF_IMMUNE_EFFECTOR_PROCESS	GO_POSITIVE_REGULATION_OF_IMMUNE_EFFECTOR_PROCESS		148	0.460379	1.36966	0	0.240566	1	2668	tags=20%, list=13%, signal=22%
GO_CYTOKINE_RECEPTOR_ACTIVITY	GO_CYTOKINE_RECEPTOR_ACTIVITY		55	0.633118	1.36965	0	0.240316	1	2185	tags=35%, list=10%, signal=38%
GO_REGULATION_OF_DNA_DAMAGE_RESPONSE_SIGNAL_TRANSDUCTION_BY_P53_CLASS_MEDIATOR	GO_REGULATION_OF_DNA_DAMAGE_RESPONSE_SIGNAL_TRANSDUCTION_BY_P53_CLASS_MEDIATOR		29	0.578783	1.36939	0	0.240311	1	895	tags=10%, list=4%, signal=11%
GO_GLYCOLYTIC_PROCESS	GO_GLYCOLYTIC_PROCESS		91	0.306418	1.36936	0	0.240062	1	1241	tags=4%, list=6%, signal=5%
GO_NEGATIVE_REGULATION_OF_LOCOMOTION	GO_NEGATIVE_REGULATION_OF_LOCOMOTION		263	0.346281	1.36914	0	0.240225	1	2155	tags=14%, list=10%, signal=15%
GO_RESPONSE_TO_NERVE_GROWTH_FACTOR	GO_RESPONSE_TO_NERVE_GROWTH_FACTOR		50	0.431223	1.36912	0.0959184	0.240056	1	799	tags=14%, list=4%, signal=15%
GO_POSITIVE_REGULATION_OF_CELL_CYCLE_ARREST	GO_POSITIVE_REGULATION_OF_CELL_CYCLE_ARREST		75	0.237035	1.36904	0.194605	0.240148	1	495	tags=3%, list=2%, signal=3%
GO_FACE_DEVELOPMENT	GO_FACE_DEVELOPMENT		47	0.39521	1.36883	0.192229	0.240153	1	929	tags=6%, list=4%, signal=7%
GO_NEGATIVE_REGULATION_OF_PHOSPHORUS_METABOLIC_PROCESS	GO_NEGATIVE_REGULATION_OF_PHOSPHORUS_METABOLIC_PROCESS		459	0.269886	1.36882	0	0.239906	1	2293	tags=8%, list=11%, signal=9%
GO_REGULATION_OF_TUMOR_NECROSIS_FACTOR_MEDIATED_SIGNALING_PATHWAY	GO_REGULATION_OF_TUMOR_NECROSIS_FACTOR_MEDIATED_SIGNALING_PATHWAY		46	0.44098	1.36876	0	0.239718	1	2904	tags=13%, list=14%, signal=15%
GO_PROTEIN_LOCALIZATION_TO_PLASMA_MEMBRANE	GO_PROTEIN_LOCALIZATION_TO_PLASMA_MEMBRANE		234	0.296065	1.36873	0	0.23955	1	1603	tags=7%, list=8%, signal=8%
GO_AMINOGLYCAN_CATABOLIC_PROCESS	GO_AMINOGLYCAN_CATABOLIC_PROCESS		49	0.498047	1.36867	0	0.239305	1	2675	tags=22%, list=13%, signal=26%
GO_PROTEASOMAL_PROTEIN_CATABOLIC_PROCESS	GO_PROTEASOMAL_PROTEIN_CATABOLIC_PROCESS		440	0.192655	1.36854	0.101562	0.239342	1	4885	tags=12%, list=23%, signal=15%
GO_PROTEOGLYCAN_BIOSYNTHETIC_PROCESS	GO_PROTEOGLYCAN_BIOSYNTHETIC_PROCESS		65	0.50341	1.36803	0	0.240253	1	1545	tags=18%, list=7%, signal=20%
GO_POSITIVE_REGULATION_OF_CYTOKINE_BIOSYNTHETIC_PROCESS	GO_POSITIVE_REGULATION_OF_CYTOKINE_BIOSYNTHETIC_PROCESS		38	0.477084	1.36735	0	0.24036	1	1712	tags=24%, list=8%, signal=26%
GO_POSITIVE_REGULATION_OF_CELL_CYCLE	GO_POSITIVE_REGULATION_OF_CELL_CYCLE		344	0.259559	1.3673	0	0.240115	1	1403	tags=4%, list=7%, signal=5%
GO_PROTEIN_LIPID_COMPLEX	GO_PROTEIN_LIPID_COMPLEX		23	0.638635	1.36718	0	0.239871	1	1381	tags=13%, list=6%, signal=14%
GO_REGULATION_OF_LIPID_METABOLIC_PROCESS	GO_REGULATION_OF_LIPID_METABOLIC_PROCESS		319	0.333144	1.36713	0	0.239627	1	2414	tags=11%, list=11%, signal=12%
GO_PULMONARY_VALVE_MORPHOGENESIS	GO_PULMONARY_VALVE_MORPHOGENESIS		16	0.716288	1.36709	0	0.239478	1	3407	tags=25%, list=16%, signal=30%
GO_IMPORT_ACROSS_PLASMA_MEMBRANE	GO_IMPORT_ACROSS_PLASMA_MEMBRANE		92	0.453869	1.36682	0	0.239763	1	2787	tags=24%, list=13%, signal=27%
GO_SUBSTRATE_DEPENDENT_CELL_MIGRATION	GO_SUBSTRATE_DEPENDENT_CELL_MIGRATION		26	0.586447	1.36576	0	0.241139	1	3332	tags=27%, list=16%, signal=32%
GO_CELL_SUBSTRATE_JUNCTION_ASSEMBLY	GO_CELL_SUBSTRATE_JUNCTION_ASSEMBLY		86	0.268044	1.36573	0	0.240986	1	3486	tags=12%, list=16%, signal=14%
GO_NEUROTRANSMITTER_TRANSPORT	GO_NEUROTRANSMITTER_TRANSPORT		222	0.345865	1.36572	0	0.240742	1	2198	tags=18%, list=10%, signal=20%
GO_RESPONSE_TO_NITRIC_OXIDE	GO_RESPONSE_TO_NITRIC_OXIDE		16	0.460277	1.36562	0.0982987	0.240692	1	632	tags=13%, list=3%, signal=13%
GO_REGULATION_OF_ADAPTIVE_IMMUNE_RESPONSE	GO_REGULATION_OF_ADAPTIVE_IMMUNE_RESPONSE		115	0.454377	1.3656	0	0.240616	1	2992	tags=22%, list=14%, signal=25%
GO_NEGATIVE_REGULATION_OF_CHEMOTAXIS	GO_NEGATIVE_REGULATION_OF_CHEMOTAXIS		45	0.506211	1.3654	0	0.240745	1	2983	tags=31%, list=14%, signal=36%
GO_RNA_CATABOLIC_PROCESS	GO_RNA_CATABOLIC_PROCESS		361	0.19651	1.36526	0	0.240503	1	8031	tags=42%, list=38%, signal=65%
GO_REGULATION_OF_HORMONE_SECRETION	GO_REGULATION_OF_HORMONE_SECRETION		205	0.388033	1.36465	0	0.241322	1	2608	tags=20%, list=12%, signal=22%
GO_CEREBELLAR_PURKINJE_CELL_LAYER_DEVELOPMENT	GO_CEREBELLAR_PURKINJE_CELL_LAYER_DEVELOPMENT		21	0.354117	1.36457	0	0.24129	1	808	tags=10%, list=4%, signal=10%
GO_POSITIVE_REGULATION_OF_CELL_ADHESION	GO_POSITIVE_REGULATION_OF_CELL_ADHESION		305	0.497049	1.3643	0	0.241208	1	2845	tags=23%, list=13%, signal=26%
GO_CELL_JUNCTION_ASSEMBLY	GO_CELL_JUNCTION_ASSEMBLY		210	0.289239	1.3637	0	0.241828	1	1533	tags=8%, list=7%, signal=9%
GO_RESPONSE_TO_AXON_INJURY	GO_RESPONSE_TO_AXON_INJURY		65	0.443303	1.3637	0.0936255	0.241586	1	2535	tags=18%, list=12%, signal=21%
GO_MITOTIC_NUCLEAR_DIVISION	GO_MITOTIC_NUCLEAR_DIVISION		262	0.207528	1.36352	0.0873181	0.241345	1	556	tags=2%, list=3%, signal=2%
GO_REGULATION_OF_PROTEIN_AUTOPHOSPHORYLATION	GO_REGULATION_OF_PROTEIN_AUTOPHOSPHORYLATION		43	0.436325	1.36338	0.0846774	0.241265	1	3928	tags=21%, list=18%, signal=26%
GO_NEGATIVE_REGULATION_OF_GLIAL_CELL_DIFFERENTIATION	GO_NEGATIVE_REGULATION_OF_GLIAL_CELL_DIFFERENTIATION		19	0.554609	1.36284	0.101562	0.241558	1	1729	tags=21%, list=8%, signal=23%
GO_POSITIVE_REGULATION_OF_MYELOID_CELL_DIFFERENTIATION	GO_POSITIVE_REGULATION_OF_MYELOID_CELL_DIFFERENTIATION		68	0.352547	1.36275	0	0.241317	1	1164	tags=9%, list=5%, signal=9%
GO_REGULATION_OF_RESPONSE_TO_WOUNDING	GO_REGULATION_OF_RESPONSE_TO_WOUNDING		122	0.449934	1.36274	0	0.241078	1	2995	tags=24%, list=14%, signal=27%
GO_REGULATION_OF_SODIUM_ION_TRANSPORT	GO_REGULATION_OF_SODIUM_ION_TRANSPORT		75	0.421908	1.36259	0.106796	0.241544	1	2727	tags=19%, list=13%, signal=21%
GO_RESPONSE_TO_CADMIUM_ION	GO_RESPONSE_TO_CADMIUM_ION		50	0.424665	1.36229	0	0.241813	1	2599	tags=12%, list=12%, signal=14%
GO_LYMPHOCYTE_ACTIVATION	GO_LYMPHOCYTE_ACTIVATION		466	0.429223	1.36114	0	0.242755	1	2712	tags=18%, list=13%, signal=20%
GO_PEPTIDE_SECRETION	GO_PEPTIDE_SECRETION		441	0.363523	1.36083	0	0.243019	1	2136	tags=15%, list=10%, signal=16%
GO_ACTIN_NUCLEATION	GO_ACTIN_NUCLEATION		50	0.421236	1.36045	0	0.243357	1	2626	tags=16%, list=12%, signal=18%
GO_ACYLGLYCEROL_HOMEOSTASIS	GO_ACYLGLYCEROL_HOMEOSTASIS		19	0.603734	1.36037	0.103659	0.243117	1	2135	tags=32%, list=10%, signal=35%
GO_B_CELL_APOPTOTIC_PROCESS	GO_B_CELL_APOPTOTIC_PROCESS		22	0.608656	1.3602	0	0.243269	1	5520	tags=41%, list=26%, signal=55%
GO_MYELOID_LEUKOCYTE_ACTIVATION	GO_MYELOID_LEUKOCYTE_ACTIVATION		475	0.306623	1.36014	0	0.243277	1	2724	tags=12%, list=13%, signal=14%
GO_NEGATIVE_REGULATION_OF_TRANSMEMBRANE_TRANSPORT	GO_NEGATIVE_REGULATION_OF_TRANSMEMBRANE_TRANSPORT		90	0.508517	1.35982	0.107422	0.243246	1	2198	tags=19%, list=10%, signal=21%
GO_NEGATIVE_REGULATION_OF_RESPONSE_TO_DRUG	GO_NEGATIVE_REGULATION_OF_RESPONSE_TO_DRUG		25	0.37297	1.35965	0	0.243007	1	1218	tags=12%, list=6%, signal=13%
GO_POSITIVE_REGULATION_OF_HEMOPOIESIS	GO_POSITIVE_REGULATION_OF_HEMOPOIESIS		140	0.322406	1.35956	0	0.242903	1	2027	tags=12%, list=9%, signal=13%
GO_CYSTEINE_TYPE_ENDOPEPTIDASE_REGULATOR_ACTIVITY_INVOLVED_IN_APOPTOTIC_PROCESS	GO_CYSTEINE_TYPE_ENDOPEPTIDASE_REGULATOR_ACTIVITY_INVOLVED_IN_APOPTOTIC_PROCESS		33	0.45972	1.35941	0.2147	0.242804	1	1465	tags=12%, list=7%, signal=13%
GO_NUCLEAR_HETEROCHROMATIN	GO_NUCLEAR_HETEROCHROMATIN		33	0.423009	1.35916	0	0.242848	1	3030	tags=9%, list=14%, signal=11%
GO_LYMPHOCYTE_DIFFERENTIATION	GO_LYMPHOCYTE_DIFFERENTIATION		243	0.45464	1.35895	0	0.242769	1	2223	tags=18%, list=10%, signal=20%
GO_FC_EPSILON_RECEPTOR_SIGNALING_PATHWAY	GO_FC_EPSILON_RECEPTOR_SIGNALING_PATHWAY		104	0.412578	1.35849	0.125	0.243214	1	4099	tags=16%, list=19%, signal=20%
GO_RAS_GUANYL_NUCLEOTIDE_EXCHANGE_FACTOR_ACTIVITY	GO_RAS_GUANYL_NUCLEOTIDE_EXCHANGE_FACTOR_ACTIVITY		127	0.331237	1.3584	0	0.243136	1	3711	tags=18%, list=17%, signal=22%
GO_NUCLEAR_RECEPTOR_TRANSCRIPTION_COACTIVATOR_ACTIVITY	GO_NUCLEAR_RECEPTOR_TRANSCRIPTION_COACTIVATOR_ACTIVITY		62	0.284406	1.35839	0	0.242899	1	889	tags=3%, list=4%, signal=3%
GO_REGULATION_OF_METAL_ION_TRANSPORT	GO_REGULATION_OF_METAL_ION_TRANSPORT		281	0.396408	1.3581	0	0.242969	1	2636	tags=20%, list=12%, signal=22%
GO_CELLULAR_TRANSITION_METAL_ION_HOMEOSTASIS	GO_CELLULAR_TRANSITION_METAL_ION_HOMEOSTASIS		84	0.486636	1.35807	0	0.242732	1	3254	tags=15%, list=15%, signal=18%
GO_PROTEOGLYCAN_BINDING	GO_PROTEOGLYCAN_BINDING		27	0.708623	1.35804	0	0.242635	1	1143	tags=22%, list=5%, signal=23%
GO_LIPASE_ACTIVITY	GO_LIPASE_ACTIVITY		81	0.439271	1.3575	0	0.243519	1	1983	tags=17%, list=9%, signal=19%
GO_PLATELET_ACTIVATION	GO_PLATELET_ACTIVATION		121	0.37798	1.35739	0	0.243512	1	1441	tags=14%, list=7%, signal=15%
GO_MESENCHYMAL_CELL_PROLIFERATION	GO_MESENCHYMAL_CELL_PROLIFERATION		44	0.341971	1.35732	0	0.243435	1	3683	tags=25%, list=17%, signal=30%
GO_RAS_PROTEIN_SIGNAL_TRANSDUCTION	GO_RAS_PROTEIN_SIGNAL_TRANSDUCTION		396	0.257424	1.35729	0	0.2432	1	2977	tags=11%, list=14%, signal=12%
GO_REGULATION_OF_IMMUNE_EFFECTOR_PROCESS	GO_REGULATION_OF_IMMUNE_EFFECTOR_PROCESS		270	0.402766	1.35696	0	0.243475	1	1571	tags=13%, list=7%, signal=13%
GO_MICROTUBULE_ORGANIZING_CENTER_PART	GO_MICROTUBULE_ORGANIZING_CENTER_PART		168	0.318151	1.35674	0	0.243393	1	2288	tags=7%, list=11%, signal=8%
GO_CELLULAR_RESPONSE_TO_COPPER_ION	GO_CELLULAR_RESPONSE_TO_COPPER_ION		18	0.562071	1.35657	0.211321	0.243668	1	1189	tags=17%, list=6%, signal=18%
GO_MRNA_CLEAVAGE	GO_MRNA_CLEAVAGE		21	0.499587	1.35638	0	0.243963	1	699	tags=5%, list=3%, signal=5%
GO_REGULATION_OF_HEMOPOIESIS	GO_REGULATION_OF_HEMOPOIESIS		377	0.297145	1.35623	0	0.243871	1	2223	tags=10%, list=10%, signal=11%
GO_REGULATION_OF_EXTENT_OF_CELL_GROWTH	GO_REGULATION_OF_EXTENT_OF_CELL_GROWTH		101	0.367816	1.35611	0	0.243827	1	2303	tags=15%, list=11%, signal=17%
GO_BASOLATERAL_PLASMA_MEMBRANE	GO_BASOLATERAL_PLASMA_MEMBRANE		164	0.352108	1.35575	0	0.244033	1	1226	tags=10%, list=6%, signal=11%
GO_NEUTRAL_LIPID_CATABOLIC_PROCESS	GO_NEUTRAL_LIPID_CATABOLIC_PROCESS		24	0.559313	1.35571	0	0.24388	1	1381	tags=17%, list=6%, signal=18%
GO_EPITHELIAL_TO_MESENCHYMAL_TRANSITION_INVOLVED_IN_ENDOCARDIAL_CUSHION_FORMATION	GO_EPITHELIAL_TO_MESENCHYMAL_TRANSITION_INVOLVED_IN_ENDOCARDIAL_CUSHION_FORMATION		16	0.591374	1.35566	0	0.24378	1	895	tags=13%, list=4%, signal=13%
GO_NEGATIVE_REGULATION_OF_INFLAMMATORY_RESPONSE	GO_NEGATIVE_REGULATION_OF_INFLAMMATORY_RESPONSE		90	0.46876	1.3553	0	0.244144	1	3247	tags=24%, list=15%, signal=29%
GO_REGULATION_OF_ENDOTHELIAL_CELL_MIGRATION	GO_REGULATION_OF_ENDOTHELIAL_CELL_MIGRATION		134	0.356406	1.35495	0	0.244149	1	3247	tags=19%, list=15%, signal=22%
GO_REGULATION_OF_THE_FORCE_OF_HEART_CONTRACTION	GO_REGULATION_OF_THE_FORCE_OF_HEART_CONTRACTION		22	0.56216	1.35492	0	0.243916	1	2727	tags=27%, list=13%, signal=31%
GO_REGULATION_OF_ANATOMICAL_STRUCTURE_SIZE	GO_REGULATION_OF_ANATOMICAL_STRUCTURE_SIZE		430	0.374095	1.35487	0	0.243683	1	2339	tags=15%, list=11%, signal=17%
GO_POSITIVE_REGULATION_OF_SUPRAMOLECULAR_FIBER_ORGANIZATION	GO_POSITIVE_REGULATION_OF_SUPRAMOLECULAR_FIBER_ORGANIZATION		181	0.320526	1.35475	0	0.243527	1	1526	tags=8%, list=7%, signal=8%
GO_NEGATIVE_REGULATION_OF_ION_TRANSMEMBRANE_TRANSPORT	GO_NEGATIVE_REGULATION_OF_ION_TRANSMEMBRANE_TRANSPORT		74	0.499113	1.35467	0.107422	0.243443	1	2198	tags=19%, list=10%, signal=21%
GO_INTESTINAL_ABSORPTION	GO_INTESTINAL_ABSORPTION		21	0.738442	1.35459	0	0.243628	1	1543	tags=38%, list=7%, signal=41%
GO_PURINE_NUCLEOSIDE_METABOLIC_PROCESS	GO_PURINE_NUCLEOSIDE_METABOLIC_PROCESS		34	0.398473	1.35449	0.0858896	0.243397	1	3654	tags=18%, list=17%, signal=21%
GO_NURD_COMPLEX	GO_NURD_COMPLEX		15	0.596221	1.35433	0.103792	0.243167	1	683	tags=7%, list=3%, signal=7%
GO_REGULATION_OF_MEIOTIC_NUCLEAR_DIVISION	GO_REGULATION_OF_MEIOTIC_NUCLEAR_DIVISION		22	0.543905	1.35409	0.0873181	0.243387	1	3288	tags=27%, list=15%, signal=32%
GO_UBIQUITIN_LIKE_PROTEIN_LIGASE_ACTIVITY	GO_UBIQUITIN_LIKE_PROTEIN_LIGASE_ACTIVITY		204	0.30684	1.35401	0	0.243382	1	2284	tags=8%, list=11%, signal=9%
GO_NEUROTROPHIN_SIGNALING_PATHWAY	GO_NEUROTROPHIN_SIGNALING_PATHWAY		37	0.40036	1.35394	0	0.243233	1	622	tags=14%, list=3%, signal=14%
GO_POSITIVE_REGULATION_OF_MEIOTIC_CELL_CYCLE	GO_POSITIVE_REGULATION_OF_MEIOTIC_CELL_CYCLE		17	0.681476	1.35373	0	0.243408	1	3288	tags=41%, list=15%, signal=49%
GO_REGULATION_OF_CARDIAC_MUSCLE_CELL_MEMBRANE_REPOLARIZATION	GO_REGULATION_OF_CARDIAC_MUSCLE_CELL_MEMBRANE_REPOLARIZATION		21	0.766042	1.35371	0	0.243343	1	1226	tags=29%, list=6%, signal=30%
GO_REGULATION_OF_GLIAL_CELL_PROLIFERATION	GO_REGULATION_OF_GLIAL_CELL_PROLIFERATION		26	0.690037	1.35356	0	0.243279	1	1808	tags=19%, list=8%, signal=21%
GO_NEGATIVE_REGULATION_OF_HYDROLASE_ACTIVITY	GO_NEGATIVE_REGULATION_OF_HYDROLASE_ACTIVITY		318	0.335498	1.3535	0	0.243137	1	1817	tags=9%, list=9%, signal=10%
GO_DEATH_RECEPTOR_BINDING	GO_DEATH_RECEPTOR_BINDING		15	0.42067	1.35349	0.0893617	0.242909	1	396	tags=7%, list=2%, signal=7%
GO_NEGATIVE_REGULATION_OF_NEURON_DEATH	GO_NEGATIVE_REGULATION_OF_NEURON_DEATH		185	0.362624	1.35339	0	0.242757	1	1956	tags=13%, list=9%, signal=14%
GO_REGULATION_OF_NEURAL_PRECURSOR_CELL_PROLIFERATION	GO_REGULATION_OF_NEURAL_PRECURSOR_CELL_PROLIFERATION		76	0.384324	1.35335	0	0.24253	1	2653	tags=16%, list=12%, signal=18%
GO_TRIGLYCERIDE_METABOLIC_PROCESS	GO_TRIGLYCERIDE_METABOLIC_PROCESS		29	0.5533	1.35331	0.11412	0.242304	1	1217	tags=10%, list=6%, signal=11%
GO_T_CELL_DIFFERENTIATION	GO_T_CELL_DIFFERENTIATION		171	0.487857	1.3532	0	0.242147	1	2430	tags=22%, list=11%, signal=24%
GO_CELL_GROWTH	GO_CELL_GROWTH		418	0.276252	1.35286	0	0.242146	1	998	tags=6%, list=5%, signal=6%
GO_PEPTIDASE_ACTIVITY	GO_PEPTIDASE_ACTIVITY		429	0.388225	1.35266	0	0.242241	1	2916	tags=16%, list=14%, signal=18%
GO_POSITIVE_REGULATION_OF_ESTABLISHMENT_OF_PROTEIN_LOCALIZATION	GO_POSITIVE_REGULATION_OF_ESTABLISHMENT_OF_PROTEIN_LOCALIZATION		352	0.332132	1.35252	0	0.242244	1	1913	tags=10%, list=9%, signal=11%
GO_CELLULAR_CARBOHYDRATE_BIOSYNTHETIC_PROCESS	GO_CELLULAR_CARBOHYDRATE_BIOSYNTHETIC_PROCESS		70	0.380082	1.35251	0	0.242019	1	3520	tags=17%, list=16%, signal=20%
GO_REGULATION_OF_B_CELL_APOPTOTIC_PROCESS	GO_REGULATION_OF_B_CELL_APOPTOTIC_PROCESS		16	0.642384	1.35239	0	0.241795	1	33	tags=6%, list=0%, signal=6%
GO_REGULATION_OF_EPITHELIAL_CELL_MIGRATION	GO_REGULATION_OF_EPITHELIAL_CELL_MIGRATION		187	0.319162	1.35219	0	0.241746	1	2106	tags=12%, list=10%, signal=14%
GO_REGULATION_OF_CALCIUM_ION_TRANSPORT	GO_REGULATION_OF_CALCIUM_ION_TRANSPORT		172	0.388252	1.35192	0	0.24196	1	2007	tags=17%, list=9%, signal=19%
GO_SECONDARY_ACTIVE_TRANSMEMBRANE_TRANSPORTER_ACTIVITY	GO_SECONDARY_ACTIVE_TRANSMEMBRANE_TRANSPORTER_ACTIVITY		174	0.419147	1.35183	0	0.241931	1	3094	tags=22%, list=14%, signal=25%
GO_ADAPTIVE_IMMUNE_RESPONSE	GO_ADAPTIVE_IMMUNE_RESPONSE		251	0.425106	1.35179	0	0.241878	1	2430	tags=18%, list=11%, signal=20%
GO_ENDOSOMAL_PART	GO_ENDOSOMAL_PART		455	0.327496	1.35178	0	0.241655	1	3039	tags=12%, list=14%, signal=14%
GO_CELL_SUBSTRATE_ADHESION	GO_CELL_SUBSTRATE_ADHESION		284	0.382976	1.35167	0	0.241588	1	3024	tags=18%, list=14%, signal=20%
GO_INTRINSIC_APOPTOTIC_SIGNALING_PATHWAY_BY_P53_CLASS_MEDIATOR	GO_INTRINSIC_APOPTOTIC_SIGNALING_PATHWAY_BY_P53_CLASS_MEDIATOR		70	0.312099	1.35125	0	0.242548	1	3541	tags=14%, list=17%, signal=17%
GO_KINASE_ACTIVATOR_ACTIVITY	GO_KINASE_ACTIVATOR_ACTIVITY		74	0.31726	1.35111	0	0.242468	1	495	tags=4%, list=2%, signal=4%
GO_MAINTENANCE_OF_LOCATION	GO_MAINTENANCE_OF_LOCATION		265	0.306724	1.35096	0	0.242659	1	2402	tags=11%, list=11%, signal=12%
GO_STRUCTURAL_CONSTITUENT_OF_CYTOSKELETON	GO_STRUCTURAL_CONSTITUENT_OF_CYTOSKELETON		71	0.365658	1.35093	0.0994152	0.242436	1	2701	tags=13%, list=13%, signal=14%
GO_ENDOCHONDRAL_BONE_MORPHOGENESIS	GO_ENDOCHONDRAL_BONE_MORPHOGENESIS		63	0.47746	1.35085	0	0.242493	1	3108	tags=24%, list=15%, signal=28%
GO_NEGATIVE_REGULATION_OF_SECRETION	GO_NEGATIVE_REGULATION_OF_SECRETION		154	0.381986	1.34974	0	0.243683	1	1934	tags=15%, list=9%, signal=16%
GO_POSITIVE_REGULATION_OF_STRESS_ACTIVATED_PROTEIN_KINASE_SIGNALING_CASCADE	GO_POSITIVE_REGULATION_OF_STRESS_ACTIVATED_PROTEIN_KINASE_SIGNALING_CASCADE		133	0.395601	1.34961	0	0.243528	1	3485	tags=18%, list=16%, signal=21%
GO_HORMONE_BINDING	GO_HORMONE_BINDING		85	0.443943	1.3493	0	0.243633	1	2725	tags=28%, list=13%, signal=32%
GO_REGULATION_OF_CELL_CELL_ADHESION	GO_REGULATION_OF_CELL_CELL_ADHESION		283	0.473608	1.34914	0	0.243665	1	2818	tags=23%, list=13%, signal=26%
GO_ION_ANTIPORTER_ACTIVITY	GO_ION_ANTIPORTER_ACTIVITY		48	0.523196	1.3488	0	0.243858	1	3025	tags=35%, list=14%, signal=41%
GO_REGULATION_OF_CELLULAR_RESPONSE_TO_VASCULAR_ENDOTHELIAL_GROWTH_FACTOR_STIMULUS	GO_REGULATION_OF_CELLULAR_RESPONSE_TO_VASCULAR_ENDOTHELIAL_GROWTH_FACTOR_STIMULUS		16	0.681543	1.34869	0	0.243852	1	3158	tags=38%, list=15%, signal=44%
GO_INTRACELLULAR_RECEPTOR_SIGNALING_PATHWAY	GO_INTRACELLULAR_RECEPTOR_SIGNALING_PATHWAY		241	0.275193	1.34866	0	0.24363	1	1034	tags=5%, list=5%, signal=6%
GO_MEMBRANE_PROTEIN_PROTEOLYSIS	GO_MEMBRANE_PROTEIN_PROTEOLYSIS		52	0.44703	1.34828	0.182731	0.24415	1	2059	tags=12%, list=10%, signal=13%
GO_REGULATION_OF_EXTRACELLULAR_MATRIX_DISASSEMBLY	GO_REGULATION_OF_EXTRACELLULAR_MATRIX_DISASSEMBLY		16	0.616295	1.34745	0.176587	0.244801	1	6248	tags=56%, list=29%, signal=79%
GO_SECONDARY_METABOLIC_PROCESS	GO_SECONDARY_METABOLIC_PROCESS		46	0.494082	1.34723	0	0.244894	1	1830	tags=17%, list=9%, signal=19%
GO_GLIAL_CELL_MIGRATION	GO_GLIAL_CELL_MIGRATION		39	0.49257	1.34714	0	0.244885	1	2705	tags=21%, list=13%, signal=23%
GO_REGULATION_OF_PROTEIN_LOCALIZATION_TO_NUCLEUS	GO_REGULATION_OF_PROTEIN_LOCALIZATION_TO_NUCLEUS		100	0.331599	1.34704	0.0769231	0.244865	1	1711	tags=6%, list=8%, signal=6%
GO_REGULATION_OF_WOUND_HEALING	GO_REGULATION_OF_WOUND_HEALING		99	0.408616	1.34696	0	0.244879	1	2995	tags=23%, list=14%, signal=27%
GO_CARBOHYDRATE_BIOSYNTHETIC_PROCESS	GO_CARBOHYDRATE_BIOSYNTHETIC_PROCESS		174	0.375433	1.34686	0	0.244927	1	2155	tags=11%, list=10%, signal=12%
GO_INTRINSIC_APOPTOTIC_SIGNALING_PATHWAY	GO_INTRINSIC_APOPTOTIC_SIGNALING_PATHWAY		251	0.302399	1.34668	0	0.244956	1	3662	tags=12%, list=17%, signal=15%
GO_REGULATION_OF_MICROTUBULE_DEPOLYMERIZATION	GO_REGULATION_OF_MICROTUBULE_DEPOLYMERIZATION		26	0.578749	1.34655	0.106339	0.244884	1	2157	tags=15%, list=10%, signal=17%
GO_BASAL_PART_OF_CELL	GO_BASAL_PART_OF_CELL		40	0.546175	1.34638	0.102823	0.244889	1	2966	tags=23%, list=14%, signal=26%
GO_RESPONSE_TO_BRONCHODILATOR	GO_RESPONSE_TO_BRONCHODILATOR		41	0.512988	1.34629	0	0.244803	1	2884	tags=24%, list=14%, signal=28%
GO_POSITIVE_REGULATION_OF_PROTEIN_BINDING	GO_POSITIVE_REGULATION_OF_PROTEIN_BINDING		88	0.302576	1.34628	0	0.244584	1	592	tags=5%, list=3%, signal=5%
GO_REACTIVE_OXYGEN_SPECIES_BIOSYNTHETIC_PROCESS	GO_REACTIVE_OXYGEN_SPECIES_BIOSYNTHETIC_PROCESS		83	0.418659	1.34625	0	0.244364	1	1961	tags=18%, list=9%, signal=20%
GO_REGULATION_OF_CELLULAR_PROTEIN_LOCALIZATION	GO_REGULATION_OF_CELLULAR_PROTEIN_LOCALIZATION		476	0.238785	1.34621	0	0.244145	1	3084	tags=9%, list=14%, signal=11%
GO_TRANSFERASE_ACTIVITY_TRANSFERRING_SULFUR_CONTAINING_GROUPS	GO_TRANSFERASE_ACTIVITY_TRANSFERRING_SULFUR_CONTAINING_GROUPS		60	0.596422	1.346	0	0.244202	1	3476	tags=35%, list=16%, signal=42%
GO_MORPHOGENESIS_OF_A_POLARIZED_EPITHELIUM	GO_MORPHOGENESIS_OF_A_POLARIZED_EPITHELIUM		134	0.278136	1.34597	0.10119	0.243984	1	4753	tags=17%, list=22%, signal=22%
GO_REGULATION_OF_CYTOSKELETON_ORGANIZATION	GO_REGULATION_OF_CYTOSKELETON_ORGANIZATION		468	0.25871	1.34543	0	0.244627	1	1931	tags=7%, list=9%, signal=8%
GO_INOSITOL_TRISPHOSPHATE_BIOSYNTHETIC_PROCESS	GO_INOSITOL_TRISPHOSPHATE_BIOSYNTHETIC_PROCESS		19	0.653672	1.34475	0	0.245599	1	3288	tags=42%, list=15%, signal=50%
GO_CALCIUM_ION_TRANSMEMBRANE_TRANSPORT	GO_CALCIUM_ION_TRANSMEMBRANE_TRANSPORT		239	0.364401	1.34464	0	0.245659	1	2876	tags=20%, list=13%, signal=23%
GO_CELLULAR_RESPONSE_TO_TOPOLOGICALLY_INCORRECT_PROTEIN	GO_CELLULAR_RESPONSE_TO_TOPOLOGICALLY_INCORRECT_PROTEIN		142	0.237159	1.34445	0.115234	0.245716	1	3238	tags=8%, list=15%, signal=10%
GO_NEGATIVE_REGULATION_OF_T_CELL_APOPTOTIC_PROCESS	GO_NEGATIVE_REGULATION_OF_T_CELL_APOPTOTIC_PROCESS		16	0.8563	1.34429	0	0.245717	1	720	tags=31%, list=3%, signal=32%
GO_NEUROMUSCULAR_PROCESS	GO_NEUROMUSCULAR_PROCESS		84	0.442535	1.34389	0	0.246179	1	1956	tags=18%, list=9%, signal=20%
GO_NEURON_CELLULAR_HOMEOSTASIS	GO_NEURON_CELLULAR_HOMEOSTASIS		29	0.504194	1.34387	0	0.245961	1	2392	tags=21%, list=11%, signal=23%
GO_REPLACEMENT_OSSIFICATION	GO_REPLACEMENT_OSSIFICATION		26	0.653687	1.34387	0	0.245742	1	3030	tags=35%, list=14%, signal=40%
GO_NEGATIVE_REGULATION_OF_NEURON_APOPTOTIC_PROCESS	GO_NEGATIVE_REGULATION_OF_NEURON_APOPTOTIC_PROCESS		136	0.356723	1.34371	0	0.24565	1	1956	tags=13%, list=9%, signal=14%
GO_AGGRESOME	GO_AGGRESOME		37	0.472351	1.34364	0	0.24558	1	142	tags=5%, list=1%, signal=5%
GO_GLYCOLYTIC_PROCESS_THROUGH_FRUCTOSE_6_PHOSPHATE	GO_GLYCOLYTIC_PROCESS_THROUGH_FRUCTOSE_6_PHOSPHATE		22	0.570593	1.34364	0.104364	0.245438	1	638	tags=9%, list=3%, signal=9%
GO_NEGATIVE_REGULATION_OF_PROTEIN_DEPHOSPHORYLATION	GO_NEGATIVE_REGULATION_OF_PROTEIN_DEPHOSPHORYLATION		51	0.437562	1.34363	0	0.245221	1	2293	tags=14%, list=11%, signal=15%
GO_TRANSFERRIN_TRANSPORT	GO_TRANSFERRIN_TRANSPORT		34	0.566843	1.34359	0.093254	0.245063	1	3392	tags=21%, list=16%, signal=24%
GO_CARBOXYPEPTIDASE_ACTIVITY	GO_CARBOXYPEPTIDASE_ACTIVITY		31	0.397148	1.34358	0	0.244847	1	1259	tags=13%, list=6%, signal=14%
GO_SYNAPTIC_TRANSMISSION_CHOLINERGIC	GO_SYNAPTIC_TRANSMISSION_CHOLINERGIC		22	0.509488	1.34322	0.0971429	0.245318	1	1974	tags=27%, list=9%, signal=30%
GO_REGULATION_OF_NEUROTRANSMITTER_UPTAKE	GO_REGULATION_OF_NEUROTRANSMITTER_UPTAKE		16	0.678313	1.34318	0	0.245199	1	2198	tags=38%, list=10%, signal=42%
GO_ATP_BIOSYNTHETIC_PROCESS	GO_ATP_BIOSYNTHETIC_PROCESS		23	0.376126	1.34305	0.165984	0.245177	1	1639	tags=9%, list=8%, signal=9%
GO_NEGATIVE_REGULATION_OF_DEFENSE_RESPONSE_TO_VIRUS	GO_NEGATIVE_REGULATION_OF_DEFENSE_RESPONSE_TO_VIRUS		19	0.557845	1.34294	0	0.245059	1	1006	tags=11%, list=5%, signal=11%
GO_REGULATION_OF_RAS_PROTEIN_SIGNAL_TRANSDUCTION	GO_REGULATION_OF_RAS_PROTEIN_SIGNAL_TRANSDUCTION		206	0.310869	1.34266	0	0.245421	1	2977	tags=14%, list=14%, signal=16%
GO_NEGATIVE_REGULATION_OF_CELL_MOTILITY	GO_NEGATIVE_REGULATION_OF_CELL_MOTILITY		220	0.320077	1.34265	0	0.245206	1	2135	tags=12%, list=10%, signal=13%
GO_POSITIVE_REGULATION_OF_VASOCONSTRICTION	GO_POSITIVE_REGULATION_OF_VASOCONSTRICTION		19	0.638675	1.34262	0	0.245058	1	3790	tags=47%, list=18%, signal=58%
GO_METAL_ION_TRANSMEMBRANE_TRANSPORTER_ACTIVITY	GO_METAL_ION_TRANSMEMBRANE_TRANSPORTER_ACTIVITY		336	0.384874	1.34257	0	0.244914	1	2402	tags=21%, list=11%, signal=23%
GO_ACTIVE_TRANSMEMBRANE_TRANSPORTER_ACTIVITY	GO_ACTIVE_TRANSMEMBRANE_TRANSPORTER_ACTIVITY		267	0.388397	1.34248	0	0.245003	1	3140	tags=19%, list=15%, signal=23%
GO_MICROTUBULE_ANCHORING	GO_MICROTUBULE_ANCHORING		25	0.554303	1.34242	0	0.244886	1	2258	tags=12%, list=11%, signal=13%
GO_NEGATIVE_REGULATION_OF_REACTIVE_OXYGEN_SPECIES_BIOSYNTHETIC_PROCESS	GO_NEGATIVE_REGULATION_OF_REACTIVE_OXYGEN_SPECIES_BIOSYNTHETIC_PROCESS		24	0.551182	1.34238	0.107422	0.244738	1	4110	tags=29%, list=19%, signal=36%
GO_REGULATION_OF_PEPTIDE_SECRETION	GO_REGULATION_OF_PEPTIDE_SECRETION		350	0.34414	1.34215	0	0.244914	1	2832	tags=18%, list=13%, signal=21%
GO_BONE_DEVELOPMENT	GO_BONE_DEVELOPMENT		178	0.360979	1.34203	0	0.24492	1	3280	tags=19%, list=15%, signal=22%
GO_ISOPRENOID_METABOLIC_PROCESS	GO_ISOPRENOID_METABOLIC_PROCESS		72	0.451176	1.34186	0.093254	0.244965	1	2564	tags=18%, list=12%, signal=20%
GO_EPIBOLY	GO_EPIBOLY		28	0.402246	1.34173	0.10166	0.24504	1	171	tags=4%, list=1%, signal=4%
GO_REGULATION_OF_PROTEIN_COMPLEX_DISASSEMBLY	GO_REGULATION_OF_PROTEIN_COMPLEX_DISASSEMBLY		99	0.401014	1.34158	0.109562	0.244828	1	2269	tags=11%, list=11%, signal=12%
GO_MHC_PROTEIN_COMPLEX	GO_MHC_PROTEIN_COMPLEX		19	0.716777	1.34153	0	0.244833	1	1865	tags=32%, list=9%, signal=35%
GO_RESPONSE_TO_AMPHETAMINE	GO_RESPONSE_TO_AMPHETAMINE		25	0.59046	1.34146	0	0.244691	1	2884	tags=32%, list=14%, signal=37%
GO_REGULATION_OF_SYNAPTIC_TRANSMISSION_GABAERGIC	GO_REGULATION_OF_SYNAPTIC_TRANSMISSION_GABAERGIC		23	0.569916	1.34131	0	0.244951	1	2622	tags=30%, list=12%, signal=35%
GO_REGULATION_OF_MEIOTIC_CELL_CYCLE	GO_REGULATION_OF_MEIOTIC_CELL_CYCLE		37	0.482838	1.34097	0.0873181	0.245287	1	3288	tags=19%, list=15%, signal=22%
GO_REGULATION_OF_PROTEIN_POLYMERIZATION	GO_REGULATION_OF_PROTEIN_POLYMERIZATION		188	0.290801	1.3407	0	0.245402	1	1526	tags=7%, list=7%, signal=8%
GO_POSITIVE_REGULATION_OF_CHEMOTAXIS	GO_POSITIVE_REGULATION_OF_CHEMOTAXIS		91	0.371026	1.34061	0.0754352	0.245191	1	2705	tags=20%, list=13%, signal=23%
GO_3_UTR_MEDIATED_MRNA_DESTABILIZATION	GO_3_UTR_MEDIATED_MRNA_DESTABILIZATION		16	0.539508	1.34059	0.197674	0.24498	1	4133	tags=25%, list=19%, signal=31%
GO_TUMOR_NECROSIS_FACTOR_MEDIATED_SIGNALING_PATHWAY	GO_TUMOR_NECROSIS_FACTOR_MEDIATED_SIGNALING_PATHWAY		129	0.441913	1.3396	0	0.246256	1	2518	tags=13%, list=12%, signal=15%
GO_PHOSPHOTYROSINE_RESIDUE_BINDING	GO_PHOSPHOTYROSINE_RESIDUE_BINDING		34	0.506598	1.33955	0.0761719	0.24617	1	3668	tags=32%, list=17%, signal=39%
GO_NEGATIVE_REGULATION_OF_LEUKOCYTE_APOPTOTIC_PROCESS	GO_NEGATIVE_REGULATION_OF_LEUKOCYTE_APOPTOTIC_PROCESS		37	0.736928	1.33937	0	0.246074	1	1133	tags=22%, list=5%, signal=23%
GO_RESPONSE_TO_IMMOBILIZATION_STRESS	GO_RESPONSE_TO_IMMOBILIZATION_STRESS		20	0.565666	1.33932	0.112381	0.245984	1	3836	tags=25%, list=18%, signal=30%
GO_NEUROTRANSMITTER_UPTAKE	GO_NEUROTRANSMITTER_UPTAKE		31	0.557371	1.33923	0	0.245822	1	2198	tags=29%, list=10%, signal=32%
GO_POSITIVE_REGULATION_OF_ADAPTIVE_IMMUNE_RESPONSE	GO_POSITIVE_REGULATION_OF_ADAPTIVE_IMMUNE_RESPONSE		76	0.512709	1.33921	0	0.245612	1	2598	tags=20%, list=12%, signal=22%
GO_NEGATIVE_REGULATION_OF_MICROTUBULE_DEPOLYMERIZATION	GO_NEGATIVE_REGULATION_OF_MICROTUBULE_DEPOLYMERIZATION		21	0.580787	1.33908	0.192229	0.245667	1	2157	tags=14%, list=10%, signal=16%
GO_POSITIVE_REGULATION_OF_LYMPHOCYTE_MIGRATION	GO_POSITIVE_REGULATION_OF_LYMPHOCYTE_MIGRATION		21	0.668306	1.33894	0	0.245846	1	2653	tags=38%, list=12%, signal=43%
GO_REGULATION_OF_LYMPHOCYTE_MIGRATION	GO_REGULATION_OF_LYMPHOCYTE_MIGRATION		36	0.592159	1.33872	0	0.246177	1	2653	tags=33%, list=12%, signal=38%
GO_HIPPOCAMPAL_MOSSY_FIBER_TO_CA3_SYNAPSE	GO_HIPPOCAMPAL_MOSSY_FIBER_TO_CA3_SYNAPSE		28	0.438141	1.3387	0	0.245967	1	904	tags=14%, list=4%, signal=15%
GO_POSITIVE_REGULATION_OF_CELLULAR_RESPONSE_TO_INSULIN_STIMULUS	GO_POSITIVE_REGULATION_OF_CELLULAR_RESPONSE_TO_INSULIN_STIMULUS		19	0.604143	1.33839	0	0.246041	1	4164	tags=26%, list=20%, signal=33%
GO_REGULATION_OF_LEUKOCYTE_APOPTOTIC_PROCESS	GO_REGULATION_OF_LEUKOCYTE_APOPTOTIC_PROCESS		64	0.622637	1.33838	0	0.245832	1	3025	tags=27%, list=14%, signal=31%
GO_PLASMINOGEN_ACTIVATION	GO_PLASMINOGEN_ACTIVATION		15	0.673232	1.33821	0.101167	0.245831	1	2818	tags=33%, list=13%, signal=38%
GO_NEGATIVE_REGULATION_OF_ENDOTHELIAL_CELL_PROLIFERATION	GO_NEGATIVE_REGULATION_OF_ENDOTHELIAL_CELL_PROLIFERATION		27	0.459563	1.33807	0	0.245893	1	2552	tags=22%, list=12%, signal=25%
GO_NUCLEAR_BODY_ORGANIZATION	GO_NUCLEAR_BODY_ORGANIZATION		15	0.70909	1.33798	0	0.245824	1	2174	tags=20%, list=10%, signal=22%
GO_NEGATIVE_REGULATION_OF_PHOSPHORYLATION	GO_NEGATIVE_REGULATION_OF_PHOSPHORYLATION		374	0.265402	1.33788	0	0.245684	1	4180	tags=17%, list=20%, signal=20%
GO_POSITIVE_REGULATION_OF_PRODUCTION_OF_MOLECULAR_MEDIATOR_OF_IMMUNE_RESPONSE	GO_POSITIVE_REGULATION_OF_PRODUCTION_OF_MOLECULAR_MEDIATOR_OF_IMMUNE_RESPONSE		72	0.530949	1.33786	0	0.245476	1	1865	tags=19%, list=9%, signal=21%
GO_CELLULAR_CARBOHYDRATE_METABOLIC_PROCESS	GO_CELLULAR_CARBOHYDRATE_METABOLIC_PROCESS		217	0.342932	1.33735	0	0.245921	1	3623	tags=18%, list=17%, signal=22%
GO_PEPTIDYL_SERINE_MODIFICATION	GO_PEPTIDYL_SERINE_MODIFICATION		268	0.296097	1.33724	0	0.245954	1	1723	tags=7%, list=8%, signal=8%
GO_REGULATION_OF_CYTOSOLIC_CALCIUM_ION_CONCENTRATION	GO_REGULATION_OF_CYTOSOLIC_CALCIUM_ION_CONCENTRATION		237	0.365962	1.33709	0	0.245849	1	2787	tags=21%, list=13%, signal=24%
GO_SERINE_TYPE_ENDOPEPTIDASE_INHIBITOR_ACTIVITY	GO_SERINE_TYPE_ENDOPEPTIDASE_INHIBITOR_ACTIVITY		45	0.471693	1.3363	0	0.24681	1	1320	tags=18%, list=6%, signal=19%
GO_IMMUNE_RESPONSE_REGULATING_CELL_SURFACE_RECEPTOR_SIGNALING_PATHWAY	GO_IMMUNE_RESPONSE_REGULATING_CELL_SURFACE_RECEPTOR_SIGNALING_PATHWAY		291	0.410534	1.33611	0	0.246825	1	2767	tags=15%, list=13%, signal=17%
GO_REGULATION_OF_LYMPHOCYTE_DIFFERENTIATION	GO_REGULATION_OF_LYMPHOCYTE_DIFFERENTIATION		121	0.403262	1.33592	0	0.246892	1	2223	tags=17%, list=10%, signal=19%
GO_PHAGOCYTOSIS	GO_PHAGOCYTOSIS		201	0.394582	1.33575	0	0.246839	1	2376	tags=17%, list=11%, signal=19%
GO_REGULATION_OF_INFLAMMATORY_RESPONSE	GO_REGULATION_OF_INFLAMMATORY_RESPONSE		216	0.386394	1.33532	0	0.247176	1	2434	tags=17%, list=11%, signal=19%
GO_REGULATION_OF_CELL_CYCLE_PHASE_TRANSITION	GO_REGULATION_OF_CELL_CYCLE_PHASE_TRANSITION		413	0.235576	1.33515	0	0.247334	1	4341	tags=11%, list=20%, signal=13%
GO_G_PROTEIN_BETA_GAMMA_SUBUNIT_COMPLEX_BINDING	GO_G_PROTEIN_BETA_GAMMA_SUBUNIT_COMPLEX_BINDING		16	0.709051	1.33463	0.10978	0.247633	1	2135	tags=25%, list=10%, signal=28%
GO_TERTIARY_GRANULE_LUMEN	GO_TERTIARY_GRANULE_LUMEN		36	0.510384	1.33459	0	0.247481	1	1184	tags=11%, list=6%, signal=12%
GO_NEGATIVE_REGULATION_OF_INTRACELLULAR_SIGNAL_TRANSDUCTION	GO_NEGATIVE_REGULATION_OF_INTRACELLULAR_SIGNAL_TRANSDUCTION		423	0.249832	1.33437	0	0.247453	1	2155	tags=7%, list=10%, signal=7%
GO_REGULATION_OF_AUTOPHAGY	GO_REGULATION_OF_AUTOPHAGY		290	0.237013	1.33405	0.0947581	0.247869	1	2449	tags=8%, list=11%, signal=8%
GO_NEGATIVE_REGULATION_OF_RECEPTOR_MEDIATED_ENDOCYTOSIS	GO_NEGATIVE_REGULATION_OF_RECEPTOR_MEDIATED_ENDOCYTOSIS		18	0.559836	1.33388	0.22379	0.247983	1	521	tags=11%, list=2%, signal=11%
GO_NEURON_PROJECTION_CYTOPLASM	GO_NEURON_PROJECTION_CYTOPLASM		80	0.270794	1.33377	0	0.248087	1	2606	tags=9%, list=12%, signal=10%
GO_REGULATION_OF_SMALL_MOLECULE_METABOLIC_PROCESS	GO_REGULATION_OF_SMALL_MOLECULE_METABOLIC_PROCESS		289	0.326692	1.33351	0	0.248407	1	3025	tags=13%, list=14%, signal=15%
GO_NEUROTRANSMITTER_SODIUM_SYMPORTER_ACTIVITY	GO_NEUROTRANSMITTER_SODIUM_SYMPORTER_ACTIVITY		16	0.746503	1.33321	0	0.248648	1	2192	tags=50%, list=10%, signal=56%
GO_REGULATION_OF_MITOCHONDRIAL_MEMBRANE_POTENTIAL	GO_REGULATION_OF_MITOCHONDRIAL_MEMBRANE_POTENTIAL		60	0.30324	1.33274	0	0.248931	1	857	tags=7%, list=4%, signal=7%
GO_LYMPH_VESSEL_DEVELOPMENT	GO_LYMPH_VESSEL_DEVELOPMENT		24	0.587817	1.33224	0	0.249354	1	3030	tags=29%, list=14%, signal=34%
GO_REGULATION_OF_RHO_PROTEIN_SIGNAL_TRANSDUCTION	GO_REGULATION_OF_RHO_PROTEIN_SIGNAL_TRANSDUCTION		115	0.346093	1.33199	0	0.249649	1	1674	tags=11%, list=8%, signal=12%
GO_NEUROEPITHELIAL_CELL_DIFFERENTIATION	GO_NEUROEPITHELIAL_CELL_DIFFERENTIATION		41	0.442578	1.33135	0	0.250463	1	3899	tags=20%, list=18%, signal=24%
GO_TRACHEA_DEVELOPMENT	GO_TRACHEA_DEVELOPMENT		19	0.493381	1.33128	0	0.250255	1	575	tags=11%, list=3%, signal=11%
GO_EXTRINSIC_COMPONENT_OF_CYTOPLASMIC_SIDE_OF_PLASMA_MEMBRANE	GO_EXTRINSIC_COMPONENT_OF_CYTOPLASMIC_SIDE_OF_PLASMA_MEMBRANE		71	0.445384	1.33124	0	0.250048	1	1329	tags=10%, list=6%, signal=10%
GO_DITERPENOID_METABOLIC_PROCESS	GO_DITERPENOID_METABOLIC_PROCESS		60	0.439999	1.33101	0.0917969	0.250068	1	2564	tags=20%, list=12%, signal=23%
GO_INTEGRIN_ACTIVATION	GO_INTEGRIN_ACTIVATION		18	0.609108	1.33051	0.217822	0.250403	1	1893	tags=22%, list=9%, signal=24%
GO_NEGATIVE_REGULATION_OF_NEUROTRANSMITTER_TRANSPORT	GO_NEGATIVE_REGULATION_OF_NEUROTRANSMITTER_TRANSPORT		20	0.461596	1.33022	0	0.250374	1	805	tags=20%, list=4%, signal=21%
GO_GLIAL_CELL_PROLIFERATION	GO_GLIAL_CELL_PROLIFERATION		38	0.46984	1.32988	0	0.250447	1	3071	tags=18%, list=14%, signal=21%
GO_RESPONSE_TO_ANESTHETIC	GO_RESPONSE_TO_ANESTHETIC		50	0.467899	1.32968	0	0.250357	1	1497	tags=14%, list=7%, signal=15%
GO_REGULATION_OF_CELL_ACTIVATION	GO_REGULATION_OF_CELL_ACTIVATION		376	0.397103	1.32953	0	0.250503	1	2261	tags=16%, list=11%, signal=18%
GO_NEGATIVE_REGULATION_OF_CELL_CYCLE_G1_S_PHASE_TRANSITION	GO_NEGATIVE_REGULATION_OF_CELL_CYCLE_G1_S_PHASE_TRANSITION		98	0.237688	1.32937	0	0.250802	1	3247	tags=9%, list=15%, signal=11%
GO_ACTIVATION_OF_MAPK_ACTIVITY	GO_ACTIVATION_OF_MAPK_ACTIVITY		132	0.354177	1.32923	0	0.250597	1	2914	tags=18%, list=14%, signal=21%
GO_PROTEIN_PHOSPHORYLATED_AMINO_ACID_BINDING	GO_PROTEIN_PHOSPHORYLATED_AMINO_ACID_BINDING		43	0.459809	1.32882	0.0761719	0.250759	1	3668	tags=26%, list=17%, signal=31%
GO_REGULATION_OF_T_CELL_DIFFERENTIATION	GO_REGULATION_OF_T_CELL_DIFFERENTIATION		100	0.434915	1.32859	0	0.250919	1	2223	tags=19%, list=10%, signal=21%
GO_BONE_MATURATION	GO_BONE_MATURATION		17	0.484202	1.32856	0.208984	0.250713	1	592	tags=12%, list=3%, signal=12%
GO_ATPASE_ACTIVITY_COUPLED	GO_ATPASE_ACTIVITY_COUPLED		310	0.30568	1.32844	0	0.250703	1	2550	tags=9%, list=12%, signal=10%
GO_REGULATION_OF_DNA_METHYLATION	GO_REGULATION_OF_DNA_METHYLATION		16	0.635251	1.32842	0.0847784	0.250498	1	435	tags=6%, list=2%, signal=6%
GO_NEGATIVE_REGULATION_OF_NIK_NF_KAPPAB_SIGNALING	GO_NEGATIVE_REGULATION_OF_NIK_NF_KAPPAB_SIGNALING		16	0.699419	1.3284	0.0917969	0.250353	1	2712	tags=19%, list=13%, signal=21%
GO_VASCULAR_SMOOTH_MUSCLE_CELL_DIFFERENTIATION	GO_VASCULAR_SMOOTH_MUSCLE_CELL_DIFFERENTIATION		24	0.449292	1.32822	0.0787879	0.250289	1	796	tags=8%, list=4%, signal=9%
GO_REGULATION_OF_PROTEIN_LOCALIZATION_TO_PLASMA_MEMBRANE	GO_REGULATION_OF_PROTEIN_LOCALIZATION_TO_PLASMA_MEMBRANE		84	0.307353	1.32816	0	0.250085	1	3352	tags=13%, list=16%, signal=15%
GO_METANEPHRIC_MESENCHYME_DEVELOPMENT	GO_METANEPHRIC_MESENCHYME_DEVELOPMENT		15	0.674447	1.32804	0.0959184	0.250006	1	1782	tags=20%, list=8%, signal=22%
GO_CELLULAR_RESPONSE_TO_REACTIVE_NITROGEN_SPECIES	GO_CELLULAR_RESPONSE_TO_REACTIVE_NITROGEN_SPECIES		18	0.441863	1.32723	0.0990476	0.250682	1	1895	tags=17%, list=9%, signal=18%
GO_RECEPTOR_INTERNALIZATION	GO_RECEPTOR_INTERNALIZATION		88	0.4112	1.32706	0.120155	0.250673	1	1664	tags=16%, list=8%, signal=17%
GO_SIDE_OF_MEMBRANE	GO_SIDE_OF_MEMBRANE		347	0.378508	1.32693	0	0.250469	1	2740	tags=18%, list=13%, signal=20%
GO_PERICENTRIC_HETEROCHROMATIN	GO_PERICENTRIC_HETEROCHROMATIN		20	0.579785	1.32692	0	0.250327	1	2533	tags=15%, list=12%, signal=17%
GO_POSITIVE_REGULATION_OF_CATABOLIC_PROCESS	GO_POSITIVE_REGULATION_OF_CATABOLIC_PROCESS		373	0.259504	1.32639	0	0.250748	1	3024	tags=9%, list=14%, signal=10%
GO_RENAL_VESICLE_DEVELOPMENT	GO_RENAL_VESICLE_DEVELOPMENT		19	0.594496	1.32616	0	0.250839	1	1168	tags=21%, list=5%, signal=22%
GO_NEURAL_CREST_CELL_DIFFERENTIATION	GO_NEURAL_CREST_CELL_DIFFERENTIATION		86	0.394046	1.32609	0	0.250801	1	3030	tags=20%, list=14%, signal=23%
GO_DIOL_BIOSYNTHETIC_PROCESS	GO_DIOL_BIOSYNTHETIC_PROCESS		19	0.615215	1.32597	0.10119	0.250775	1	861	tags=11%, list=4%, signal=11%
GO_POSITIVE_REGULATION_OF_JNK_CASCADE	GO_POSITIVE_REGULATION_OF_JNK_CASCADE		110	0.403855	1.32589	0	0.250743	1	1980	tags=13%, list=9%, signal=14%
GO_HYDROLASE_ACTIVITY_ACTING_ON_GLYCOSYL_BONDS	GO_HYDROLASE_ACTIVITY_ACTING_ON_GLYCOSYL_BONDS		89	0.462896	1.32569	0	0.250756	1	3217	tags=19%, list=15%, signal=22%
GO_ENDOCARDIAL_CUSHION_MORPHOGENESIS	GO_ENDOCARDIAL_CUSHION_MORPHOGENESIS		33	0.462279	1.32559	0	0.250695	1	3232	tags=24%, list=15%, signal=29%
GO_LAMININ_BINDING	GO_LAMININ_BINDING		28	0.573961	1.32554	0.107143	0.250553	1	1608	tags=18%, list=8%, signal=19%
GO_RESPONSE_TO_XENOBIOTIC_STIMULUS	GO_RESPONSE_TO_XENOBIOTIC_STIMULUS		200	0.395225	1.32531	0	0.250678	1	2980	tags=18%, list=14%, signal=20%
GO_RESPONSE_TO_STEROID_HORMONE	GO_RESPONSE_TO_STEROID_HORMONE		322	0.310392	1.32513	0	0.250688	1	2885	tags=15%, list=14%, signal=17%
GO_RESPONSE_TO_INTERFERON_BETA	GO_RESPONSE_TO_INTERFERON_BETA		20	0.428946	1.32513	0.173828	0.250487	1	6806	tags=35%, list=32%, signal=51%
GO_POSITIVE_REGULATION_OF_HEART_RATE	GO_POSITIVE_REGULATION_OF_HEART_RATE		20	0.473058	1.32488	0	0.250286	1	1226	tags=25%, list=6%, signal=26%
GO_POSITIVE_REGULATION_OF_CHEMOKINE_PRODUCTION	GO_POSITIVE_REGULATION_OF_CHEMOKINE_PRODUCTION		38	0.413742	1.32472	0	0.250225	1	1712	tags=18%, list=8%, signal=20%
GO_POSITIVE_REGULATION_OF_RHO_PROTEIN_SIGNAL_TRANSDUCTION	GO_POSITIVE_REGULATION_OF_RHO_PROTEIN_SIGNAL_TRANSDUCTION		18	0.722171	1.32471	0	0.250025	1	1674	tags=33%, list=8%, signal=36%
GO_LUMENAL_SIDE_OF_MEMBRANE	GO_LUMENAL_SIDE_OF_MEMBRANE		26	0.516495	1.32457	0.18609	0.24993	1	33	tags=4%, list=0%, signal=4%
GO_REGULATION_OF_HEART_RATE_BY_CARDIAC_CONDUCTION	GO_REGULATION_OF_HEART_RATE_BY_CARDIAC_CONDUCTION		34	0.464536	1.32445	0	0.249802	1	1226	tags=24%, list=6%, signal=25%
GO_VENTRICULAR_CARDIAC_MUSCLE_CELL_MEMBRANE_REPOLARIZATION	GO_VENTRICULAR_CARDIAC_MUSCLE_CELL_MEMBRANE_REPOLARIZATION		22	0.597041	1.32445	0.108987	0.249603	1	1226	tags=23%, list=6%, signal=24%
GO_CYTOPLASMIC_MICROTUBULE_ORGANIZATION	GO_CYTOPLASMIC_MICROTUBULE_ORGANIZATION		52	0.353112	1.32412	0.204589	0.249999	1	1466	tags=8%, list=7%, signal=8%
GO_VASCULAR_ENDOTHELIAL_GROWTH_FACTOR_PRODUCTION	GO_VASCULAR_ENDOTHELIAL_GROWTH_FACTOR_PRODUCTION		26	0.515922	1.32406	0	0.249845	1	2675	tags=27%, list=13%, signal=31%
GO_POSITIVE_REGULATION_OF_LIPID_METABOLIC_PROCESS	GO_POSITIVE_REGULATION_OF_LIPID_METABOLIC_PROCESS		103	0.3601	1.32386	0	0.249763	1	1596	tags=13%, list=7%, signal=14%
GO_GAP_JUNCTION	GO_GAP_JUNCTION		17	0.65339	1.32386	0.0882353	0.249565	1	1323	tags=24%, list=6%, signal=25%
GO_NEUTROPHIL_MIGRATION	GO_NEUTROPHIL_MIGRATION		53	0.515384	1.3238	0	0.249367	1	1967	tags=30%, list=9%, signal=33%
GO_PHOSPHOLIPID_TRANSPORTER_ACTIVITY	GO_PHOSPHOLIPID_TRANSPORTER_ACTIVITY		55	0.621572	1.32372	0	0.249337	1	3135	tags=25%, list=15%, signal=30%
GO_MONOVALENT_INORGANIC_CATION_TRANSPORT	GO_MONOVALENT_INORGANIC_CATION_TRANSPORT		384	0.360714	1.32355	0	0.249211	1	2787	tags=18%, list=13%, signal=21%
GO_STEROID_METABOLIC_PROCESS	GO_STEROID_METABOLIC_PROCESS		233	0.339295	1.32334	0	0.249409	1	2938	tags=15%, list=14%, signal=18%
GO_POSITIVE_REGULATION_OF_PROTEIN_MATURATION	GO_POSITIVE_REGULATION_OF_PROTEIN_MATURATION		20	0.685745	1.32306	0.101365	0.249769	1	2356	tags=30%, list=11%, signal=34%
GO_RESPONSE_TO_CARBOHYDRATE	GO_RESPONSE_TO_CARBOHYDRATE		187	0.3651	1.32289	0	0.249715	1	1815	tags=10%, list=9%, signal=11%
GO_MONOVALENT_INORGANIC_ANION_HOMEOSTASIS	GO_MONOVALENT_INORGANIC_ANION_HOMEOSTASIS		17	0.559356	1.32233	0	0.250282	1	701	tags=18%, list=3%, signal=18%
GO_PROTEIN_HOMOOLIGOMERIZATION	GO_PROTEIN_HOMOOLIGOMERIZATION		284	0.333699	1.32217	0	0.250191	1	3024	tags=15%, list=14%, signal=18%
GO_NEURAL_CREST_CELL_MIGRATION	GO_NEURAL_CREST_CELL_MIGRATION		55	0.456014	1.32213	0	0.250053	1	2238	tags=24%, list=10%, signal=26%
GO_MEMBRANE_LIPID_BIOSYNTHETIC_PROCESS	GO_MEMBRANE_LIPID_BIOSYNTHETIC_PROCESS		129	0.329854	1.3219	0	0.250322	1	3477	tags=16%, list=16%, signal=18%
GO_SULFOTRANSFERASE_ACTIVITY	GO_SULFOTRANSFERASE_ACTIVITY		44	0.608188	1.32185	0	0.250262	1	3476	tags=43%, list=16%, signal=51%
GO_T_CELL_APOPTOTIC_PROCESS	GO_T_CELL_APOPTOTIC_PROCESS		35	0.724182	1.32184	0	0.250124	1	3024	tags=29%, list=14%, signal=33%
GO_REGULATION_OF_STEROID_METABOLIC_PROCESS	GO_REGULATION_OF_STEROID_METABOLIC_PROCESS		98	0.369497	1.32176	0	0.249928	1	1572	tags=10%, list=7%, signal=11%
GO_POSITIVE_REGULATION_OF_EXTRACELLULAR_MATRIX_ORGANIZATION	GO_POSITIVE_REGULATION_OF_EXTRACELLULAR_MATRIX_ORGANIZATION		20	0.578329	1.32168	0	0.24986	1	1122	tags=15%, list=5%, signal=16%
GO_PHOSPHOPROTEIN_BINDING	GO_PHOSPHOPROTEIN_BINDING		71	0.402441	1.32157	0.078629	0.249735	1	3753	tags=21%, list=18%, signal=26%
GO_POSTSYNAPTIC_DENSITY_INTRACELLULAR_COMPONENT	GO_POSTSYNAPTIC_DENSITY_INTRACELLULAR_COMPONENT		17	0.430496	1.3215	0	0.249609	1	165	tags=6%, list=1%, signal=6%
GO_NEGATIVE_REGULATION_OF_IMMUNE_RESPONSE	GO_NEGATIVE_REGULATION_OF_IMMUNE_RESPONSE		91	0.447748	1.32138	0	0.249415	1	2992	tags=23%, list=14%, signal=27%
GO_NEURAL_PRECURSOR_CELL_PROLIFERATION	GO_NEURAL_PRECURSOR_CELL_PROLIFERATION		133	0.336547	1.32124	0	0.249287	1	2766	tags=14%, list=13%, signal=15%
GO_POSITIVE_REGULATION_OF_CARTILAGE_DEVELOPMENT	GO_POSITIVE_REGULATION_OF_CARTILAGE_DEVELOPMENT		29	0.436393	1.32091	0	0.249348	1	2653	tags=24%, list=12%, signal=28%
GO_REGULATION_OF_ANIMAL_ORGAN_MORPHOGENESIS	GO_REGULATION_OF_ANIMAL_ORGAN_MORPHOGENESIS		227	0.321437	1.32086	0	0.249154	1	1354	tags=8%, list=6%, signal=9%
GO_HYPOTHALAMUS_DEVELOPMENT	GO_HYPOTHALAMUS_DEVELOPMENT		15	0.567916	1.32041	0.0882353	0.249606	1	2888	tags=20%, list=14%, signal=23%
GO_INFLAMMATORY_RESPONSE	GO_INFLAMMATORY_RESPONSE		441	0.404012	1.31993	0	0.250429	1	2846	tags=21%, list=13%, signal=24%
GO_REGULATION_OF_NEUROLOGICAL_SYSTEM_PROCESS	GO_REGULATION_OF_NEUROLOGICAL_SYSTEM_PROCESS		103	0.43611	1.31978	0	0.25048	1	1503	tags=20%, list=7%, signal=22%
GO_ORGANIC_HYDROXY_COMPOUND_BIOSYNTHETIC_PROCESS	GO_ORGANIC_HYDROXY_COMPOUND_BIOSYNTHETIC_PROCESS		208	0.34659	1.31966	0	0.25045	1	3304	tags=15%, list=15%, signal=18%
GO_NEGATIVE_REGULATION_OF_AUTOPHAGY	GO_NEGATIVE_REGULATION_OF_AUTOPHAGY		71	0.311912	1.31958	0	0.250308	1	2288	tags=8%, list=11%, signal=9%
GO_AMINO_ACID_IMPORT	GO_AMINO_ACID_IMPORT		21	0.68904	1.31922	0	0.250568	1	2198	tags=33%, list=10%, signal=37%
GO_PRODUCTION_OF_MOLECULAR_MEDIATOR_OF_IMMUNE_RESPONSE	GO_PRODUCTION_OF_MOLECULAR_MEDIATOR_OF_IMMUNE_RESPONSE		143	0.469338	1.31913	0	0.250442	1	2778	tags=18%, list=13%, signal=21%
GO_CARBOHYDRATE_TRANSPORT	GO_CARBOHYDRATE_TRANSPORT		117	0.35486	1.31911	0	0.250359	1	847	tags=7%, list=4%, signal=7%
GO_MICROTUBULE_POLYMERIZATION	GO_MICROTUBULE_POLYMERIZATION		65	0.335179	1.31833	0.230143	0.251731	1	911	tags=5%, list=4%, signal=5%
GO_CELLULAR_RESPONSE_TO_NITRIC_OXIDE	GO_CELLULAR_RESPONSE_TO_NITRIC_OXIDE		15	0.474182	1.31828	0	0.251621	1	632	tags=13%, list=3%, signal=14%
GO_ALPHA_BETA_T_CELL_ACTIVATION	GO_ALPHA_BETA_T_CELL_ACTIVATION		100	0.4917	1.31788	0	0.251679	1	2778	tags=26%, list=13%, signal=30%
GO_LYSOSOMAL_LUMEN	GO_LYSOSOMAL_LUMEN		84	0.382576	1.31771	0.121094	0.251675	1	2675	tags=15%, list=13%, signal=18%
GO_MOLTING_CYCLE	GO_MOLTING_CYCLE		86	0.369537	1.31768	0.093617	0.251482	1	1137	tags=8%, list=5%, signal=9%
GO_REGION_OF_CYTOSOL	GO_REGION_OF_CYTOSOL		24	0.549885	1.31752	0.102823	0.251593	1	168	tags=8%, list=1%, signal=8%
GO_REGULATION_OF_PHAGOCYTOSIS	GO_REGULATION_OF_PHAGOCYTOSIS		65	0.517708	1.31727	0	0.25177	1	2376	tags=23%, list=11%, signal=26%
GO_RESPONSE_TO_VITAMIN	GO_RESPONSE_TO_VITAMIN		76	0.379371	1.31659	0	0.252151	1	1782	tags=13%, list=8%, signal=14%
GO_PROTEIN_DNA_COMPLEX	GO_PROTEIN_DNA_COMPLEX		173	0.4119	1.31634	0	0.252022	1	2397	tags=8%, list=11%, signal=9%
GO_REGULATION_OF_GLIOGENESIS	GO_REGULATION_OF_GLIOGENESIS		94	0.423871	1.3163	0	0.251955	1	1808	tags=16%, list=8%, signal=17%
GO_2_IRON_2_SULFUR_CLUSTER_BINDING	GO_2_IRON_2_SULFUR_CLUSTER_BINDING		21	0.584962	1.31626	0.121094	0.251812	1	1192	tags=14%, list=6%, signal=15%
GO_REGULATION_OF_PROTEIN_OLIGOMERIZATION	GO_REGULATION_OF_PROTEIN_OLIGOMERIZATION		35	0.423511	1.3162	0.114341	0.251683	1	1913	tags=14%, list=9%, signal=16%
GO_MODIFICATION_OF_POSTSYNAPTIC_STRUCTURE	GO_MODIFICATION_OF_POSTSYNAPTIC_STRUCTURE		15	0.573792	1.31617	0	0.251575	1	4946	tags=33%, list=23%, signal=43%
GO_RESPONSE_TO_MUSCLE_ACTIVITY	GO_RESPONSE_TO_MUSCLE_ACTIVITY		18	0.534488	1.31586	0.11753	0.251586	1	527	tags=11%, list=2%, signal=11%
GO_CELLULAR_RESPONSE_TO_VASCULAR_ENDOTHELIAL_GROWTH_FACTOR_STIMULUS	GO_CELLULAR_RESPONSE_TO_VASCULAR_ENDOTHELIAL_GROWTH_FACTOR_STIMULUS		48	0.390327	1.31571	0	0.251683	1	3158	tags=25%, list=15%, signal=29%
GO_GLYCEROLIPID_CATABOLIC_PROCESS	GO_GLYCEROLIPID_CATABOLIC_PROCESS		41	0.414652	1.31557	0	0.251555	1	1983	tags=12%, list=9%, signal=13%
GO_PROTEIN_POLYUBIQUITINATION	GO_PROTEIN_POLYUBIQUITINATION		285	0.266608	1.3155	0	0.251499	1	5582	tags=19%, list=26%, signal=25%
GO_PROTEIN_POLYMERIZATION	GO_PROTEIN_POLYMERIZATION		239	0.267953	1.31489	0	0.252044	1	1526	tags=7%, list=7%, signal=7%
GO_MYELOID_LEUKOCYTE_MEDIATED_IMMUNITY	GO_MYELOID_LEUKOCYTE_MEDIATED_IMMUNITY		422	0.294829	1.31475	0	0.252003	1	2475	tags=10%, list=12%, signal=11%
GO_GTPASE_BINDING	GO_GTPASE_BINDING		497	0.242312	1.31474	0	0.251812	1	1910	tags=7%, list=9%, signal=8%
GO_STEM_CELL_PROLIFERATION	GO_STEM_CELL_PROLIFERATION		101	0.387719	1.31445	0	0.251677	1	575	tags=6%, list=3%, signal=6%
GO_ACETYLGALACTOSAMINYLTRANSFERASE_ACTIVITY	GO_ACETYLGALACTOSAMINYLTRANSFERASE_ACTIVITY		40	0.455159	1.31431	0	0.251667	1	3218	tags=28%, list=15%, signal=32%
GO_POSITIVE_REGULATION_OF_KIDNEY_DEVELOPMENT	GO_POSITIVE_REGULATION_OF_KIDNEY_DEVELOPMENT		38	0.478086	1.31414	0	0.251811	1	1281	tags=16%, list=6%, signal=17%
GO_MICROTUBULE_POLYMERIZATION_OR_DEPOLYMERIZATION	GO_MICROTUBULE_POLYMERIZATION_OR_DEPOLYMERIZATION		100	0.317327	1.31402	0	0.251677	1	911	tags=5%, list=4%, signal=5%
GO_NUCLEOSIDE_PHOSPHATE_BIOSYNTHETIC_PROCESS	GO_NUCLEOSIDE_PHOSPHATE_BIOSYNTHETIC_PROCESS		227	0.258298	1.31393	0	0.251644	1	1639	tags=5%, list=8%, signal=6%
GO_CATION_TRANSMEMBRANE_TRANSPORTER_ACTIVITY	GO_CATION_TRANSMEMBRANE_TRANSPORTER_ACTIVITY		476	0.368706	1.31392	0	0.251454	1	2402	tags=18%, list=11%, signal=19%
GO_AXO_DENDRITIC_TRANSPORT	GO_AXO_DENDRITIC_TRANSPORT		65	0.280595	1.31385	0	0.251547	1	2303	tags=8%, list=11%, signal=9%
GO_NEGATIVE_REGULATION_OF_ALPHA_BETA_T_CELL_ACTIVATION	GO_NEGATIVE_REGULATION_OF_ALPHA_BETA_T_CELL_ACTIVATION		30	0.630591	1.31382	0	0.251415	1	4593	tags=53%, list=22%, signal=68%
GO_SERTOLI_CELL_DIFFERENTIATION	GO_SERTOLI_CELL_DIFFERENTIATION		18	0.589034	1.31348	0	0.251589	1	2564	tags=22%, list=12%, signal=25%
GO_NEGATIVE_REGULATION_OF_BINDING	GO_NEGATIVE_REGULATION_OF_BINDING		140	0.336287	1.31341	0	0.251465	1	4859	tags=24%, list=23%, signal=30%
GO_STRESS_GRANULE_ASSEMBLY	GO_STRESS_GRANULE_ASSEMBLY		18	0.365727	1.31323	0.203593	0.251464	1	1907	tags=11%, list=9%, signal=12%
GO_BRUSH_BORDER	GO_BRUSH_BORDER		75	0.43951	1.31267	0	0.251901	1	1788	tags=19%, list=8%, signal=20%
GO_PEPTIDE_METABOLIC_PROCESS	GO_PEPTIDE_METABOLIC_PROCESS		91	0.243591	1.31264	0	0.251778	1	342	tags=3%, list=2%, signal=3%
GO_GOLGI_TO_PLASMA_MEMBRANE_TRANSPORT	GO_GOLGI_TO_PLASMA_MEMBRANE_TRANSPORT		58	0.407716	1.31232	0.0953307	0.251714	1	3464	tags=10%, list=16%, signal=12%
GO_NEGATIVE_REGULATION_OF_GENE_EXPRESSION_EPIGENETIC	GO_NEGATIVE_REGULATION_OF_GENE_EXPRESSION_EPIGENETIC		116	0.332291	1.31217	0	0.251774	1	7864	tags=38%, list=37%, signal=60%
GO_REGULATION_OF_OSTEOBLAST_DIFFERENTIATION	GO_REGULATION_OF_OSTEOBLAST_DIFFERENTIATION		100	0.371944	1.31195	0	0.252119	1	1378	tags=9%, list=6%, signal=10%
GO_CELLULAR_AMINO_ACID_BIOSYNTHETIC_PROCESS	GO_CELLULAR_AMINO_ACID_BIOSYNTHETIC_PROCESS		53	0.348383	1.31193	0.194444	0.251931	1	6430	tags=30%, list=30%, signal=43%
GO_SYNCYTIUM_FORMATION	GO_SYNCYTIUM_FORMATION		35	0.478253	1.31183	0.1	0.25181	1	716	tags=14%, list=3%, signal=15%
GO_CHROMOSOME_SEPARATION	GO_CHROMOSOME_SEPARATION		84	0.316525	1.31176	0	0.251688	1	2841	tags=7%, list=13%, signal=8%
GO_MYELOID_LEUKOCYTE_MIGRATION	GO_MYELOID_LEUKOCYTE_MIGRATION		116	0.468185	1.31168	0	0.251705	1	1980	tags=23%, list=9%, signal=26%
GO_REGULATION_OF_PROTEIN_LOCALIZATION_TO_CELL_PERIPHERY	GO_REGULATION_OF_PROTEIN_LOCALIZATION_TO_CELL_PERIPHERY		100	0.273627	1.31128	0	0.251979	1	3558	tags=12%, list=17%, signal=14%
GO_REGULATION_OF_LYMPHOCYTE_ACTIVATION	GO_REGULATION_OF_LYMPHOCYTE_ACTIVATION		293	0.424358	1.31094	0	0.252163	1	2261	tags=17%, list=11%, signal=19%
GO_INTRINSIC_COMPONENT_OF_GOLGI_MEMBRANE	GO_INTRINSIC_COMPONENT_OF_GOLGI_MEMBRANE		61	0.410753	1.3109	0.10099	0.252042	1	1968	tags=10%, list=9%, signal=11%
GO_REGULATION_OF_HAIR_CYCLE	GO_REGULATION_OF_HAIR_CYCLE		21	0.367274	1.31061	0	0.252232	1	59	tags=5%, list=0%, signal=5%
GO_CHROMATIN_ORGANIZATION_INVOLVED_IN_REGULATION_OF_TRANSCRIPTION	GO_CHROMATIN_ORGANIZATION_INVOLVED_IN_REGULATION_OF_TRANSCRIPTION		109	0.324889	1.31044	0	0.252162	1	1754	tags=6%, list=8%, signal=6%
GO_WOUND_HEALING	GO_WOUND_HEALING		424	0.314942	1.31032	0	0.252089	1	3168	tags=17%, list=15%, signal=20%
GO_INTERLEUKIN_17_PRODUCTION	GO_INTERLEUKIN_17_PRODUCTION		18	0.459558	1.3103	0	0.251902	1	1113	tags=28%, list=5%, signal=29%
GO_MHC_PROTEIN_COMPLEX_BINDING	GO_MHC_PROTEIN_COMPLEX_BINDING		16	0.742813	1.3103	0.104364	0.251716	1	1730	tags=31%, list=8%, signal=34%
GO_CARDIAC_MUSCLE_CELL_ACTION_POTENTIAL_INVOLVED_IN_CONTRACTION	GO_CARDIAC_MUSCLE_CELL_ACTION_POTENTIAL_INVOLVED_IN_CONTRACTION		45	0.431774	1.31021	0	0.25165	1	1226	tags=18%, list=6%, signal=19%
GO_CYTOPLASMIC_PATTERN_RECOGNITION_RECEPTOR_SIGNALING_PATHWAY	GO_CYTOPLASMIC_PATTERN_RECOGNITION_RECEPTOR_SIGNALING_PATHWAY		53	0.476702	1.30975	0.115234	0.252483	1	1034	tags=11%, list=5%, signal=12%
GO_POSITIVE_REGULATION_OF_PHAGOCYTOSIS	GO_POSITIVE_REGULATION_OF_PHAGOCYTOSIS		46	0.586178	1.30957	0	0.252425	1	2376	tags=24%, list=11%, signal=27%
GO_REGULATION_OF_EXTRACELLULAR_MATRIX_ORGANIZATION	GO_REGULATION_OF_EXTRACELLULAR_MATRIX_ORGANIZATION		36	0.535697	1.30949	0.0860656	0.252282	1	1164	tags=17%, list=5%, signal=18%
GO_NEURAL_TUBE_PATTERNING	GO_NEURAL_TUBE_PATTERNING		36	0.343511	1.30942	0	0.252096	1	924	tags=6%, list=4%, signal=6%
GO_EXTRACELLULAR_MATRIX_DISASSEMBLY	GO_EXTRACELLULAR_MATRIX_DISASSEMBLY		60	0.508064	1.30941	0.0853659	0.251911	1	4430	tags=35%, list=21%, signal=44%
GO_CYCLIC_NUCLEOTIDE_PHOSPHODIESTERASE_ACTIVITY	GO_CYCLIC_NUCLEOTIDE_PHOSPHODIESTERASE_ACTIVITY		25	0.470251	1.30932	0.0917969	0.251774	1	1475	tags=28%, list=7%, signal=30%
GO_REGULATION_OF_MICROTUBULE_POLYMERIZATION	GO_REGULATION_OF_MICROTUBULE_POLYMERIZATION		42	0.395327	1.30931	0.233954	0.251589	1	285	tags=5%, list=1%, signal=5%
GO_RESPONSE_TO_AMMONIUM_ION	GO_RESPONSE_TO_AMMONIUM_ION		97	0.400274	1.30868	0	0.251996	1	2262	tags=16%, list=11%, signal=18%
GO_DEFENSE_RESPONSE_TO_OTHER_ORGANISM	GO_DEFENSE_RESPONSE_TO_OTHER_ORGANISM		286	0.348399	1.30853	0	0.251976	1	1563	tags=10%, list=7%, signal=11%
GO_LIGASE_ACTIVITY_FORMING_CARBON_SULFUR_BONDS	GO_LIGASE_ACTIVITY_FORMING_CARBON_SULFUR_BONDS		33	0.429181	1.30852	0.102616	0.251872	1	1299	tags=9%, list=6%, signal=10%
GO_REGULATION_OF_OSSIFICATION	GO_REGULATION_OF_OSSIFICATION		157	0.37614	1.30793	0	0.252782	1	3683	tags=22%, list=17%, signal=27%
GO_ORGANIC_ANION_TRANSPORT	GO_ORGANIC_ANION_TRANSPORT		362	0.313056	1.30773	0	0.25265	1	2241	tags=14%, list=11%, signal=15%
GO_ATP_DEPENDENT_CHROMATIN_REMODELING	GO_ATP_DEPENDENT_CHROMATIN_REMODELING		76	0.444408	1.30741	0	0.252974	1	8325	tags=51%, list=39%, signal=84%
GO_INTERMEDIATE_FILAMENT_CYTOSKELETON	GO_INTERMEDIATE_FILAMENT_CYTOSKELETON		95	0.355622	1.30734	0	0.252789	1	2697	tags=14%, list=13%, signal=16%
GO_NEUROTROPHIN_TRK_RECEPTOR_SIGNALING_PATHWAY	GO_NEUROTROPHIN_TRK_RECEPTOR_SIGNALING_PATHWAY		31	0.411242	1.30731	0	0.25267	1	622	tags=16%, list=3%, signal=17%
GO_VASODILATION	GO_VASODILATION		24	0.620369	1.30716	0	0.252636	1	2135	tags=25%, list=10%, signal=28%
GO_HORMONE_TRANSPORT	GO_HORMONE_TRANSPORT		252	0.358946	1.30674	0	0.252954	1	2396	tags=17%, list=11%, signal=19%
GO_MITOTIC_SPINDLE_ASSEMBLY	GO_MITOTIC_SPINDLE_ASSEMBLY		51	0.346415	1.30661	0.0919037	0.252824	1	142	tags=2%, list=1%, signal=2%
GO_EPITHELIAL_CELL_DIFFERENTIATION	GO_EPITHELIAL_CELL_DIFFERENTIATION		493	0.307131	1.30631	0	0.253042	1	2842	tags=14%, list=13%, signal=16%
GO_ACTIVATION_OF_JUN_KINASE_ACTIVITY	GO_ACTIVATION_OF_JUN_KINASE_ACTIVITY		36	0.37648	1.30603	0	0.25313	1	3195	tags=17%, list=15%, signal=20%
GO_OXIDOREDUCTASE_ACTIVITY_ACTING_ON_THE_CH_CH_GROUP_OF_DONORS_NAD_OR_NADP_AS_ACCEPTOR	GO_OXIDOREDUCTASE_ACTIVITY_ACTING_ON_THE_CH_CH_GROUP_OF_DONORS_NAD_OR_NADP_AS_ACCEPTOR		24	0.54956	1.30598	0.0998043	0.252946	1	772	tags=8%, list=4%, signal=9%
GO_REGULATION_OF_RESPONSE_TO_OXIDATIVE_STRESS	GO_REGULATION_OF_RESPONSE_TO_OXIDATIVE_STRESS		71	0.307916	1.30598	0.0905588	0.252763	1	1782	tags=7%, list=8%, signal=8%
GO_3_5_CYCLIC_GMP_PHOSPHODIESTERASE_ACTIVITY	GO_3_5_CYCLIC_GMP_PHOSPHODIESTERASE_ACTIVITY		15	0.512568	1.3058	0.0914397	0.253101	1	1475	tags=27%, list=7%, signal=29%
GO_HIPPO_SIGNALING	GO_HIPPO_SIGNALING		37	0.329421	1.30565	0.0917969	0.253287	1	619	tags=3%, list=3%, signal=3%
GO_REGULATION_OF_SYMBIOSIS_ENCOMPASSING_MUTUALISM_THROUGH_PARASITISM	GO_REGULATION_OF_SYMBIOSIS_ENCOMPASSING_MUTUALISM_THROUGH_PARASITISM		184	0.330127	1.30537	0.105906	0.253746	1	3927	tags=11%, list=18%, signal=14%
GO_DEPHOSPHORYLATION	GO_DEPHOSPHORYLATION		408	0.25922	1.30525	0	0.253616	1	3228	tags=12%, list=15%, signal=13%
GO_POSITIVE_REGULATION_OF_MRNA_CATABOLIC_PROCESS	GO_POSITIVE_REGULATION_OF_MRNA_CATABOLIC_PROCESS		46	0.385809	1.30516	0.104364	0.253653	1	6326	tags=28%, list=30%, signal=40%
GO_ACTIVATION_OF_IMMUNE_RESPONSE	GO_ACTIVATION_OF_IMMUNE_RESPONSE		435	0.389554	1.30513	0	0.25359	1	2775	tags=16%, list=13%, signal=18%
GO_IMMUNE_RESPONSE_REGULATING_SIGNALING_PATHWAY	GO_IMMUNE_RESPONSE_REGULATING_SIGNALING_PATHWAY		416	0.397378	1.30427	0	0.254776	1	3000	tags=17%, list=14%, signal=19%
GO_MONOCYTE_CHEMOTAXIS	GO_MONOCYTE_CHEMOTAXIS		26	0.617159	1.30397	0.0860656	0.255061	1	1980	tags=23%, list=9%, signal=25%
GO_POSITIVE_REGULATION_OF_RESPONSE_TO_EXTERNAL_STIMULUS	GO_POSITIVE_REGULATION_OF_RESPONSE_TO_EXTERNAL_STIMULUS		200	0.382406	1.30378	0	0.25511	1	2705	tags=22%, list=13%, signal=24%
GO_GLYCOPROTEIN_BIOSYNTHETIC_PROCESS	GO_GLYCOPROTEIN_BIOSYNTHETIC_PROCESS		290	0.359899	1.30375	0	0.255005	1	3369	tags=17%, list=16%, signal=19%
GO_HORMONE_METABOLIC_PROCESS	GO_HORMONE_METABOLIC_PROCESS		151	0.39371	1.30355	0	0.25505	1	2414	tags=19%, list=11%, signal=22%
GO_NEGATIVE_REGULATION_OF_CYSTEINE_TYPE_ENDOPEPTIDASE_ACTIVITY	GO_NEGATIVE_REGULATION_OF_CYSTEINE_TYPE_ENDOPEPTIDASE_ACTIVITY		76	0.400431	1.30326	0.0914397	0.255388	1	1596	tags=11%, list=7%, signal=11%
GO_BINDING_OF_SPERM_TO_ZONA_PELLUCIDA	GO_BINDING_OF_SPERM_TO_ZONA_PELLUCIDA		23	0.540179	1.30288	0	0.255527	1	1800	tags=22%, list=8%, signal=24%
GO_MONOAMINE_TRANSPORT	GO_MONOAMINE_TRANSPORT		60	0.461259	1.30287	0	0.255344	1	2136	tags=33%, list=10%, signal=37%
GO_AMEBOIDAL_TYPE_CELL_MIGRATION	GO_AMEBOIDAL_TYPE_CELL_MIGRATION		342	0.305265	1.30279	0	0.255161	1	2995	tags=16%, list=14%, signal=18%
GO_ACETYLCHOLINE_RECEPTOR_ACTIVITY	GO_ACETYLCHOLINE_RECEPTOR_ACTIVITY		16	0.556248	1.3024	0	0.255641	1	614	tags=25%, list=3%, signal=26%
GO_MHC_CLASS_II_PROTEIN_COMPLEX_BINDING	GO_MHC_CLASS_II_PROTEIN_COMPLEX_BINDING		15	0.748723	1.30239	0.104364	0.255608	1	1730	tags=33%, list=8%, signal=36%
GO_ENZYME_INHIBITOR_ACTIVITY	GO_ENZYME_INHIBITOR_ACTIVITY		253	0.352679	1.3017	0	0.256233	1	2842	tags=13%, list=13%, signal=15%
GO_REGULATION_OF_B_CELL_RECEPTOR_SIGNALING_PATHWAY	GO_REGULATION_OF_B_CELL_RECEPTOR_SIGNALING_PATHWAY		17	0.595549	1.3015	0.177734	0.256407	1	3897	tags=47%, list=18%, signal=58%
GO_REGULATION_OF_NEURON_PROJECTION_REGENERATION	GO_REGULATION_OF_NEURON_PROJECTION_REGENERATION		26	0.644613	1.30133	0	0.256283	1	3649	tags=35%, list=17%, signal=42%
GO_HISTONE_EXCHANGE	GO_HISTONE_EXCHANGE		53	0.481734	1.30116	0	0.256421	1	8219	tags=62%, list=39%, signal=101%
GO_REGULATION_OF_VIRAL_INDUCED_CYTOPLASMIC_PATTERN_RECOGNITION_RECEPTOR_SIGNALING_PATHWAY	GO_REGULATION_OF_VIRAL_INDUCED_CYTOPLASMIC_PATTERN_RECOGNITION_RECEPTOR_SIGNALING_PATHWAY		16	0.635558	1.30083	0.115234	0.256944	1	2668	tags=19%, list=13%, signal=21%
GO_POSITIVE_REGULATION_OF_LEUKOCYTE_DIFFERENTIATION	GO_POSITIVE_REGULATION_OF_LEUKOCYTE_DIFFERENTIATION		107	0.321426	1.30077	0	0.256891	1	2223	tags=14%, list=10%, signal=16%
GO_CORE_PROMOTER_BINDING	GO_CORE_PROMOTER_BINDING		51	0.423151	1.30044	0	0.257249	1	1168	tags=6%, list=5%, signal=6%
GO_OUTFLOW_TRACT_SEPTUM_MORPHOGENESIS	GO_OUTFLOW_TRACT_SEPTUM_MORPHOGENESIS		27	0.450033	1.29958	0	0.257965	1	362	tags=7%, list=2%, signal=8%
GO_REGULATION_OF_MORPHOGENESIS_OF_AN_EPITHELIUM	GO_REGULATION_OF_MORPHOGENESIS_OF_AN_EPITHELIUM		162	0.250538	1.29948	0	0.257842	1	4168	tags=15%, list=20%, signal=18%
GO_NEGATIVE_REGULATION_OF_CYTOKINE_PRODUCTION	GO_NEGATIVE_REGULATION_OF_CYTOKINE_PRODUCTION		185	0.379918	1.29943	0	0.257801	1	2778	tags=20%, list=13%, signal=23%
GO_REGULATION_OF_STRESS_ACTIVATED_PROTEIN_KINASE_SIGNALING_CASCADE	GO_REGULATION_OF_STRESS_ACTIVATED_PROTEIN_KINASE_SIGNALING_CASCADE		188	0.329449	1.29938	0	0.257802	1	3485	tags=15%, list=16%, signal=18%
GO_PROTEIN_SERINE_THREONINE_PHOSPHATASE_COMPLEX	GO_PROTEIN_SERINE_THREONINE_PHOSPHATASE_COMPLEX		45	0.325545	1.29936	0.11501	0.257679	1	1918	tags=4%, list=9%, signal=5%
GO_GLAND_DEVELOPMENT	GO_GLAND_DEVELOPMENT		375	0.269822	1.29903	0	0.257984	1	1815	tags=8%, list=9%, signal=9%
GO_MATERNAL_PLACENTA_DEVELOPMENT	GO_MATERNAL_PLACENTA_DEVELOPMENT		29	0.381535	1.29898	0.10559	0.257877	1	1596	tags=7%, list=7%, signal=7%
GO_REGULATION_OF_DNA_BINDING_TRANSCRIPTION_FACTOR_ACTIVITY	GO_REGULATION_OF_DNA_BINDING_TRANSCRIPTION_FACTOR_ACTIVITY		354	0.283428	1.29885	0	0.257853	1	3097	tags=14%, list=15%, signal=17%
GO_GOLGI_TO_PLASMA_MEMBRANE_PROTEIN_TRANSPORT	GO_GOLGI_TO_PLASMA_MEMBRANE_PROTEIN_TRANSPORT		36	0.511546	1.29879	0.196498	0.257716	1	1603	tags=8%, list=8%, signal=9%
GO_REGULATION_OF_SISTER_CHROMATID_SEGREGATION	GO_REGULATION_OF_SISTER_CHROMATID_SEGREGATION		78	0.271669	1.29873	0	0.257623	1	7455	tags=24%, list=35%, signal=37%
GO_MUCOPOLYSACCHARIDE_METABOLIC_PROCESS	GO_MUCOPOLYSACCHARIDE_METABOLIC_PROCESS		16	0.618018	1.29865	0	0.257493	1	2018	tags=44%, list=9%, signal=48%
GO_POSITIVE_REGULATION_OF_GTPASE_ACTIVITY	GO_POSITIVE_REGULATION_OF_GTPASE_ACTIVITY		338	0.312769	1.29829	0.192229	0.257984	1	3159	tags=13%, list=15%, signal=15%
GO_BICARBONATE_TRANSPORT	GO_BICARBONATE_TRANSPORT		28	0.5051	1.29821	0.11501	0.257852	1	2328	tags=25%, list=11%, signal=28%
GO_NEGATIVE_REGULATION_OF_PROTEIN_TYROSINE_KINASE_ACTIVITY	GO_NEGATIVE_REGULATION_OF_PROTEIN_TYROSINE_KINASE_ACTIVITY		25	0.405812	1.29791	0.0996094	0.257923	1	3921	tags=20%, list=18%, signal=24%
GO_HISTONE_H4_ACETYLATION	GO_HISTONE_H4_ACETYLATION		64	0.335322	1.29786	0.311284	0.257898	1	4352	tags=13%, list=20%, signal=16%
GO_NEGATIVE_REGULATION_OF_PROTEIN_COMPLEX_ASSEMBLY	GO_NEGATIVE_REGULATION_OF_PROTEIN_COMPLEX_ASSEMBLY		116	0.348553	1.29772	0	0.257931	1	1934	tags=11%, list=9%, signal=12%
GO_REGULATION_OF_MESONEPHROS_DEVELOPMENT	GO_REGULATION_OF_MESONEPHROS_DEVELOPMENT		22	0.517572	1.29765	0	0.257812	1	1168	tags=18%, list=5%, signal=19%
GO_PHOSPHOLIPID_TRANSLOCATING_ATPASE_ACTIVITY	GO_PHOSPHOLIPID_TRANSLOCATING_ATPASE_ACTIVITY		19	0.624025	1.29764	0.111328	0.257631	1	1671	tags=21%, list=8%, signal=23%
GO_CELLULAR_ALDEHYDE_METABOLIC_PROCESS	GO_CELLULAR_ALDEHYDE_METABOLIC_PROCESS		35	0.57752	1.29746	0	0.257624	1	2572	tags=29%, list=12%, signal=32%
GO_AUTOPHAGOSOME	GO_AUTOPHAGOSOME		83	0.297137	1.29725	0	0.257639	1	3319	tags=12%, list=16%, signal=14%
GO_DEVELOPMENT_OF_PRIMARY_FEMALE_SEXUAL_CHARACTERISTICS	GO_DEVELOPMENT_OF_PRIMARY_FEMALE_SEXUAL_CHARACTERISTICS		87	0.370289	1.29702	0	0.257713	1	997	tags=10%, list=5%, signal=11%
GO_METAPHASE_ANAPHASE_TRANSITION_OF_CELL_CYCLE	GO_METAPHASE_ANAPHASE_TRANSITION_OF_CELL_CYCLE		55	0.324697	1.29658	0	0.258538	1	5582	tags=16%, list=26%, signal=22%
GO_POTASSIUM_ION_TRANSPORT	GO_POTASSIUM_ION_TRANSPORT		176	0.393756	1.29646	0	0.258672	1	2915	tags=25%, list=14%, signal=29%
GO_REGULATION_OF_T_CELL_ACTIVATION	GO_REGULATION_OF_T_CELL_ACTIVATION		215	0.484542	1.29643	0	0.258543	1	2261	tags=20%, list=11%, signal=22%
GO_REGULATION_OF_CELLULAR_CARBOHYDRATE_METABOLIC_PROCESS	GO_REGULATION_OF_CELLULAR_CARBOHYDRATE_METABOLIC_PROCESS		97	0.362595	1.2963	0	0.258554	1	3541	tags=21%, list=17%, signal=25%
GO_REGULATION_OF_PRODUCTION_OF_MOLECULAR_MEDIATOR_OF_IMMUNE_RESPONSE	GO_REGULATION_OF_PRODUCTION_OF_MOLECULAR_MEDIATOR_OF_IMMUNE_RESPONSE		101	0.506628	1.29625	0	0.258374	1	2778	tags=24%, list=13%, signal=27%
GO_REGULATION_OF_PROTEIN_MODIFICATION_BY_SMALL_PROTEIN_CONJUGATION_OR_REMOVAL	GO_REGULATION_OF_PROTEIN_MODIFICATION_BY_SMALL_PROTEIN_CONJUGATION_OR_REMOVAL		199	0.394225	1.29594	0	0.258648	1	5931	tags=26%, list=28%, signal=36%
GO_EXIT_FROM_MITOSIS	GO_EXIT_FROM_MITOSIS		29	0.4266	1.29574	0.102823	0.25852	1	2842	tags=10%, list=13%, signal=12%
GO_TRANSMEMBRANE_RECEPTOR_PROTEIN_SERINE_THREONINE_KINASE_SIGNALING_PATHWAY	GO_TRANSMEMBRANE_RECEPTOR_PROTEIN_SERINE_THREONINE_KINASE_SIGNALING_PATHWAY		275	0.296026	1.29523	0	0.259042	1	1846	tags=8%, list=9%, signal=9%
GO_CYTOPLASMIC_PATTERN_RECOGNITION_RECEPTOR_SIGNALING_PATHWAY_IN_RESPONSE_TO_VIRUS	GO_CYTOPLASMIC_PATTERN_RECOGNITION_RECEPTOR_SIGNALING_PATHWAY_IN_RESPONSE_TO_VIRUS		22	0.627418	1.29505	0	0.259118	1	1006	tags=14%, list=5%, signal=14%
GO_LYSINE_ACETYLATED_HISTONE_BINDING	GO_LYSINE_ACETYLATED_HISTONE_BINDING		18	0.512339	1.29491	0.0979167	0.259238	1	500	tags=6%, list=2%, signal=6%
GO_ORGANIC_ACID_TRANSPORT	GO_ORGANIC_ACID_TRANSPORT		241	0.322647	1.29472	0	0.259348	1	2241	tags=15%, list=11%, signal=16%
GO_MEMBRANE_LIPID_METABOLIC_PROCESS	GO_MEMBRANE_LIPID_METABOLIC_PROCESS		181	0.283137	1.29465	0.103586	0.259304	1	3477	tags=12%, list=16%, signal=14%
GO_MICROBODY	GO_MICROBODY		119	0.345588	1.29463	0.0860656	0.259124	1	2567	tags=12%, list=12%, signal=13%
GO_FIBRINOLYSIS	GO_FIBRINOLYSIS		15	0.617724	1.29444	0.0770751	0.259151	1	4602	tags=33%, list=22%, signal=42%
GO_REGULATION_OF_COAGULATION	GO_REGULATION_OF_COAGULATION		61	0.431821	1.29438	0	0.259162	1	2818	tags=26%, list=13%, signal=30%
GO_EXTERNAL_SIDE_OF_PLASMA_MEMBRANE	GO_EXTERNAL_SIDE_OF_PLASMA_MEMBRANE		192	0.433743	1.29412	0	0.2594	1	2740	tags=26%, list=13%, signal=30%
GO_RNA_POLYMERASE_II_CORE_PROMOTER_SEQUENCE_SPECIFIC_DNA_BINDING	GO_RNA_POLYMERASE_II_CORE_PROMOTER_SEQUENCE_SPECIFIC_DNA_BINDING		32	0.575119	1.29405	0	0.25941	1	1168	tags=9%, list=5%, signal=10%
GO_PDZ_DOMAIN_BINDING	GO_PDZ_DOMAIN_BINDING		73	0.368632	1.29381	0.0996094	0.259514	1	3084	tags=16%, list=14%, signal=19%
GO_REGULATION_OF_CARBOHYDRATE_METABOLIC_PROCESS	GO_REGULATION_OF_CARBOHYDRATE_METABOLIC_PROCESS		169	0.307199	1.29353	0.10099	0.259859	1	3541	tags=14%, list=17%, signal=17%
GO_REGULATION_OF_T_CELL_APOPTOTIC_PROCESS	GO_REGULATION_OF_T_CELL_APOPTOTIC_PROCESS		25	0.772742	1.29343	0	0.259762	1	2778	tags=36%, list=13%, signal=41%
GO_ENDOCARDIAL_CUSHION_FORMATION	GO_ENDOCARDIAL_CUSHION_FORMATION		23	0.521928	1.29302	0	0.260305	1	1782	tags=17%, list=8%, signal=19%
GO_LEUKOCYTE_CELL_CELL_ADHESION	GO_LEUKOCYTE_CELL_CELL_ADHESION		229	0.492259	1.29282	0	0.260442	1	2261	tags=22%, list=11%, signal=25%
GO_REGULATION_OF_T_CELL_MIGRATION	GO_REGULATION_OF_T_CELL_MIGRATION		24	0.678845	1.29239	0	0.26063	1	2653	tags=38%, list=12%, signal=43%
GO_NEGATIVE_REGULATION_OF_TUMOR_NECROSIS_FACTOR_SUPERFAMILY_CYTOKINE_PRODUCTION	GO_NEGATIVE_REGULATION_OF_TUMOR_NECROSIS_FACTOR_SUPERFAMILY_CYTOKINE_PRODUCTION		38	0.435865	1.29209	0	0.260969	1	1559	tags=18%, list=7%, signal=20%
GO_EARLY_ENDOSOME	GO_EARLY_ENDOSOME		309	0.319747	1.29171	0	0.261273	1	1919	tags=8%, list=9%, signal=9%
GO_GROWTH_PLATE_CARTILAGE_CHONDROCYTE_DIFFERENTIATION	GO_GROWTH_PLATE_CARTILAGE_CHONDROCYTE_DIFFERENTIATION		19	0.486671	1.29154	0.0833333	0.261259	1	3108	tags=26%, list=15%, signal=31%
GO_REGULATION_OF_CHROMOSOME_SEPARATION	GO_REGULATION_OF_CHROMOSOME_SEPARATION		60	0.317096	1.29145	0	0.261126	1	8116	tags=35%, list=38%, signal=56%
GO_REGULATION_OF_ANTIGEN_RECEPTOR_MEDIATED_SIGNALING_PATHWAY	GO_REGULATION_OF_ANTIGEN_RECEPTOR_MEDIATED_SIGNALING_PATHWAY		41	0.457693	1.29136	0.0742857	0.261114	1	3897	tags=24%, list=18%, signal=30%
GO_INTRINSIC_APOPTOTIC_SIGNALING_PATHWAY_IN_RESPONSE_TO_DNA_DAMAGE_BY_P53_CLASS_MEDIATOR	GO_INTRINSIC_APOPTOTIC_SIGNALING_PATHWAY_IN_RESPONSE_TO_DNA_DAMAGE_BY_P53_CLASS_MEDIATOR		40	0.374495	1.2912	0.165984	0.2611	1	3472	tags=15%, list=16%, signal=18%
GO_CELL_CYCLE_G2_M_PHASE_TRANSITION	GO_CELL_CYCLE_G2_M_PHASE_TRANSITION		255	0.15408	1.29109	0.112426	0.26101	1	367	tags=1%, list=2%, signal=1%
GO_DNA_REPLICATION_INDEPENDENT_NUCLEOSOME_ORGANIZATION	GO_DNA_REPLICATION_INDEPENDENT_NUCLEOSOME_ORGANIZATION		54	0.406021	1.29108	0.23913	0.260831	1	8230	tags=57%, list=39%, signal=93%
GO_LAMELLIPODIUM_ORGANIZATION	GO_LAMELLIPODIUM_ORGANIZATION		76	0.312096	1.29091	0	0.260812	1	4112	tags=20%, list=19%, signal=24%
GO_REGULATION_OF_REGULATED_SECRETORY_PATHWAY	GO_REGULATION_OF_REGULATED_SECRETORY_PATHWAY		131	0.349723	1.29082	0	0.260684	1	2140	tags=17%, list=10%, signal=19%
GO_GRANULOCYTE_MIGRATION	GO_GRANULOCYTE_MIGRATION		68	0.497957	1.29034	0	0.261014	1	1967	tags=28%, list=9%, signal=31%
GO_SELECTIVE_AUTOPHAGY	GO_SELECTIVE_AUTOPHAGY		45	0.258349	1.29029	0	0.261016	1	1260	tags=4%, list=6%, signal=5%
GO_AORTA_MORPHOGENESIS	GO_AORTA_MORPHOGENESIS		28	0.483731	1.29007	0.18985	0.260944	1	410	tags=7%, list=2%, signal=7%
GO_INTERLEUKIN_2_BIOSYNTHETIC_PROCESS	GO_INTERLEUKIN_2_BIOSYNTHETIC_PROCESS		15	0.634693	1.28912	0.183505	0.262403	1	1119	tags=33%, list=5%, signal=35%
GO_ENDOPLASMIC_RETICULUM_QUALITY_CONTROL_COMPARTMENT	GO_ENDOPLASMIC_RETICULUM_QUALITY_CONTROL_COMPARTMENT		21	0.436815	1.28886	0.101167	0.26257	1	1100	tags=5%, list=5%, signal=5%
GO_COAGULATION	GO_COAGULATION		264	0.329937	1.28808	0	0.264291	1	3167	tags=19%, list=15%, signal=22%
GO_DNA_PACKAGING_COMPLEX	GO_DNA_PACKAGING_COMPLEX		95	0.565405	1.28807	0.111328	0.264111	1	1754	tags=11%, list=8%, signal=11%
GO_TETRAPYRROLE_METABOLIC_PROCESS	GO_TETRAPYRROLE_METABOLIC_PROCESS		22	0.485864	1.28787	0.188	0.264296	1	1712	tags=18%, list=8%, signal=20%
GO_PEPTIDE_HORMONE_PROCESSING	GO_PEPTIDE_HORMONE_PROCESSING		20	0.462631	1.28765	0	0.264459	1	1788	tags=25%, list=8%, signal=27%
GO_REGULATION_OF_DNA_METABOLIC_PROCESS	GO_REGULATION_OF_DNA_METABOLIC_PROCESS		249	0.18406	1.28763	0	0.264324	1	655	tags=2%, list=3%, signal=2%
GO_REGULATION_OF_SYSTEM_PROCESS	GO_REGULATION_OF_SYSTEM_PROCESS		453	0.341916	1.28761	0	0.264195	1	1399	tags=13%, list=7%, signal=14%
GO_ANION_HOMEOSTASIS	GO_ANION_HOMEOSTASIS		41	0.530025	1.28758	0	0.264016	1	3025	tags=24%, list=14%, signal=28%
GO_CELL_CELL_RECOGNITION	GO_CELL_CELL_RECOGNITION		42	0.530397	1.2873	0.22332	0.264327	1	1800	tags=24%, list=8%, signal=26%
GO_NEPHRON_DEVELOPMENT	GO_NEPHRON_DEVELOPMENT		125	0.38501	1.28712	0	0.264406	1	1959	tags=15%, list=9%, signal=17%
GO_ACTIVATION_OF_ADENYLATE_CYCLASE_ACTIVITY	GO_ACTIVATION_OF_ADENYLATE_CYCLASE_ACTIVITY		24	0.528436	1.28708	0.104	0.264227	1	1260	tags=21%, list=6%, signal=22%
GO_MUSCLE_CELL_DIFFERENTIATION	GO_MUSCLE_CELL_DIFFERENTIATION		288	0.321026	1.28676	0	0.264441	1	838	tags=8%, list=4%, signal=8%
GO_PLASMA_MEMBRANE_PROTEIN_COMPLEX	GO_PLASMA_MEMBRANE_PROTEIN_COMPLEX		445	0.377974	1.28673	0	0.26436	1	1533	tags=17%, list=7%, signal=18%
GO_VASCULAR_ENDOTHELIAL_GROWTH_FACTOR_SIGNALING_PATHWAY	GO_VASCULAR_ENDOTHELIAL_GROWTH_FACTOR_SIGNALING_PATHWAY		33	0.498339	1.28658	0	0.264436	1	3158	tags=33%, list=15%, signal=39%
GO_REGULATION_OF_MEGAKARYOCYTE_DIFFERENTIATION	GO_REGULATION_OF_MEGAKARYOCYTE_DIFFERENTIATION		75	0.356302	1.28623	0	0.264831	1	1754	tags=9%, list=8%, signal=10%
GO_RETROGRADE_TRANSPORT_ENDOSOME_TO_GOLGI	GO_RETROGRADE_TRANSPORT_ENDOSOME_TO_GOLGI		79	0.262195	1.28544	0.0957447	0.266053	1	397	tags=3%, list=2%, signal=3%
GO_NUCLEOTIDE_PHOSPHORYLATION	GO_NUCLEOTIDE_PHOSPHORYLATION		20	0.468587	1.28452	0.104938	0.267669	1	2164	tags=15%, list=10%, signal=17%
GO_STEROL_BIOSYNTHETIC_PROCESS	GO_STEROL_BIOSYNTHETIC_PROCESS		66	0.348548	1.284	0	0.268319	1	1381	tags=6%, list=6%, signal=6%
GO_ACTIVATION_OF_GTPASE_ACTIVITY	GO_ACTIVATION_OF_GTPASE_ACTIVITY		77	0.354025	1.28377	0	0.268492	1	3159	tags=13%, list=15%, signal=15%
GO_PRIMARY_ALCOHOL_METABOLIC_PROCESS	GO_PRIMARY_ALCOHOL_METABOLIC_PROCESS		51	0.484686	1.28343	0.213115	0.268971	1	1030	tags=14%, list=5%, signal=14%
GO_DERMATAN_SULFATE_PROTEOGLYCAN_BIOSYNTHETIC_PROCESS	GO_DERMATAN_SULFATE_PROTEOGLYCAN_BIOSYNTHETIC_PROCESS		15	0.67432	1.28295	0.0820312	0.269234	1	1545	tags=33%, list=7%, signal=36%
GO_NEGATIVE_REGULATION_OF_AXON_GUIDANCE	GO_NEGATIVE_REGULATION_OF_AXON_GUIDANCE		28	0.434416	1.28295	0.20381	0.269053	1	2983	tags=32%, list=14%, signal=37%
GO_B_CELL_DIFFERENTIATION	GO_B_CELL_DIFFERENTIATION		87	0.456063	1.28286	0.227823	0.269305	1	1413	tags=13%, list=7%, signal=13%
GO_NEGATIVE_REGULATION_OF_CELL_ADHESION	GO_NEGATIVE_REGULATION_OF_CELL_ADHESION		199	0.415287	1.2826	0	0.269415	1	2817	tags=22%, list=13%, signal=25%
GO_NEUROTRANSMITTER_TRANSPORTER_ACTIVITY	GO_NEUROTRANSMITTER_TRANSPORTER_ACTIVITY		35	0.495563	1.28253	0	0.269473	1	2192	tags=26%, list=10%, signal=29%
GO_ENDOSOME_LUMEN	GO_ENDOSOME_LUMEN		21	0.530412	1.28245	0	0.269341	1	2521	tags=19%, list=12%, signal=22%
GO_OXIDOREDUCTASE_ACTIVITY_ACTING_ON_THE_CH_NH_GROUP_OF_DONORS	GO_OXIDOREDUCTASE_ACTIVITY_ACTING_ON_THE_CH_NH_GROUP_OF_DONORS		25	0.584085	1.28238	0.111328	0.269241	1	2310	tags=24%, list=11%, signal=27%
GO_NEGATIVE_REGULATION_OF_BLOOD_PRESSURE	GO_NEGATIVE_REGULATION_OF_BLOOD_PRESSURE		34	0.579167	1.28236	0.107422	0.269061	1	2140	tags=35%, list=10%, signal=39%
GO_LEUKOCYTE_DIFFERENTIATION	GO_LEUKOCYTE_DIFFERENTIATION		363	0.351743	1.28212	0	0.269308	1	2712	tags=17%, list=13%, signal=19%
GO_LAMELLIPODIUM_ASSEMBLY	GO_LAMELLIPODIUM_ASSEMBLY		59	0.35022	1.28175	0.103586	0.269787	1	4112	tags=20%, list=19%, signal=25%
GO_RIG_I_SIGNALING_PATHWAY	GO_RIG_I_SIGNALING_PATHWAY		15	0.711047	1.28173	0	0.269665	1	2668	tags=20%, list=13%, signal=23%
GO_POSITIVE_REGULATION_OF_BLOOD_VESSEL_DIAMETER	GO_POSITIVE_REGULATION_OF_BLOOD_VESSEL_DIAMETER		44	0.636222	1.28157	0	0.269765	1	2140	tags=30%, list=10%, signal=33%
GO_FAT_CELL_DIFFERENTIATION	GO_FAT_CELL_DIFFERENTIATION		185	0.391582	1.28157	0	0.269585	1	4357	tags=27%, list=20%, signal=34%
GO_CELL_PROJECTION_MEMBRANE	GO_CELL_PROJECTION_MEMBRANE		275	0.325707	1.28139	0	0.269622	1	1508	tags=12%, list=7%, signal=12%
GO_EXOCYTIC_VESICLE	GO_EXOCYTIC_VESICLE		184	0.325434	1.28135	0	0.269487	1	1292	tags=10%, list=6%, signal=10%
GO_ADRENERGIC_RECEPTOR_SIGNALING_PATHWAY	GO_ADRENERGIC_RECEPTOR_SIGNALING_PATHWAY		19	0.64754	1.28126	0.0990476	0.26936	1	1260	tags=26%, list=6%, signal=28%
GO_ENDOLYSOSOME	GO_ENDOLYSOSOME		15	0.767695	1.28108	0	0.269515	1	2521	tags=20%, list=12%, signal=23%
GO_CHROMOSOME_CONDENSATION	GO_CHROMOSOME_CONDENSATION		35	0.432403	1.2807	0.0909091	0.269959	1	358	tags=3%, list=2%, signal=3%
GO_MITOCHONDRIAL_PROTEIN_COMPLEX	GO_MITOCHONDRIAL_PROTEIN_COMPLEX		226	0.199425	1.28064	0.226	0.269822	1	8065	tags=31%, list=38%, signal=49%
GO_REGULATION_OF_TRANSMEMBRANE_TRANSPORT	GO_REGULATION_OF_TRANSMEMBRANE_TRANSPORT		429	0.335009	1.28047	0	0.270029	1	2915	tags=21%, list=14%, signal=23%
GO_LYASE_ACTIVITY	GO_LYASE_ACTIVITY		148	0.334525	1.28036	0	0.270162	1	1738	tags=8%, list=8%, signal=9%
GO_CATECHOLAMINE_SECRETION	GO_CATECHOLAMINE_SECRETION		42	0.451371	1.28033	0	0.269983	1	1131	tags=26%, list=5%, signal=28%
GO_POSITIVE_REGULATION_OF_TRANSMEMBRANE_RECEPTOR_PROTEIN_SERINE_THREONINE_KINASE_SIGNALING_PATHWAY	GO_POSITIVE_REGULATION_OF_TRANSMEMBRANE_RECEPTOR_PROTEIN_SERINE_THREONINE_KINASE_SIGNALING_PATHWAY		88	0.353126	1.28008	0.0869565	0.270145	1	3560	tags=19%, list=17%, signal=23%
GO_COCHLEA_DEVELOPMENT	GO_COCHLEA_DEVELOPMENT		44	0.374263	1.27994	0	0.270252	1	1354	tags=11%, list=6%, signal=12%
GO_ENDOTHELIAL_CELL_MIGRATION	GO_ENDOTHELIAL_CELL_MIGRATION		175	0.323428	1.27962	0	0.270598	1	2995	tags=17%, list=14%, signal=20%
GO_MONONUCLEAR_CELL_MIGRATION	GO_MONONUCLEAR_CELL_MIGRATION		43	0.464701	1.27939	0.160714	0.270738	1	3288	tags=28%, list=15%, signal=33%
GO_ORGANELLE_DISASSEMBLY	GO_ORGANELLE_DISASSEMBLY		91	0.220754	1.27925	0.183594	0.270806	1	496	tags=2%, list=2%, signal=2%
GO_POSITIVE_REGULATION_OF_SIGNAL_TRANSDUCTION_BY_P53_CLASS_MEDIATOR	GO_POSITIVE_REGULATION_OF_SIGNAL_TRANSDUCTION_BY_P53_CLASS_MEDIATOR		20	0.460374	1.27895	0	0.270977	1	5894	tags=50%, list=28%, signal=69%
GO_ADAPTIVE_IMMUNE_RESPONSE_BASED_ON_SOMATIC_RECOMBINATION_OF_IMMUNE_RECEPTORS_BUILT_FROM_IMMUNOGLOBULIN_SUPERFAMILY_DOMAINS	GO_ADAPTIVE_IMMUNE_RESPONSE_BASED_ON_SOMATIC_RECOMBINATION_OF_IMMUNE_RECEPTORS_BUILT_FROM_IMMUNOGLOBULIN_SUPERFAMILY_DOMAINS		180	0.397844	1.27861	0	0.271073	1	3582	tags=24%, list=17%, signal=29%
GO_CELLULAR_RESPONSE_TO_XENOBIOTIC_STIMULUS	GO_CELLULAR_RESPONSE_TO_XENOBIOTIC_STIMULUS		114	0.389504	1.27848	0	0.27109	1	2980	tags=18%, list=14%, signal=20%
GO_NEGATIVE_REGULATION_OF_RESPONSE_TO_BIOTIC_STIMULUS	GO_NEGATIVE_REGULATION_OF_RESPONSE_TO_BIOTIC_STIMULUS		31	0.51206	1.27802	0.115234	0.271443	1	4799	tags=29%, list=22%, signal=37%
GO_INORGANIC_ION_IMPORT_ACROSS_PLASMA_MEMBRANE	GO_INORGANIC_ION_IMPORT_ACROSS_PLASMA_MEMBRANE		65	0.420285	1.27778	0	0.271565	1	2787	tags=25%, list=13%, signal=28%
GO_REGULATION_OF_RESPONSE_TO_DNA_DAMAGE_STIMULUS	GO_REGULATION_OF_RESPONSE_TO_DNA_DAMAGE_STIMULUS		195	0.237174	1.27766	0	0.271444	1	5377	tags=19%, list=25%, signal=26%
GO_POSITIVE_REGULATION_OF_SMALL_GTPASE_MEDIATED_SIGNAL_TRANSDUCTION	GO_POSITIVE_REGULATION_OF_SMALL_GTPASE_MEDIATED_SIGNAL_TRANSDUCTION		56	0.497745	1.27727	0	0.272115	1	2705	tags=27%, list=13%, signal=31%
GO_PIGMENT_GRANULE	GO_PIGMENT_GRANULE		100	0.308946	1.27718	0	0.272042	1	1654	tags=5%, list=8%, signal=5%
GO_LEUKOCYTE_MIGRATION	GO_LEUKOCYTE_MIGRATION		274	0.400709	1.27713	0	0.271863	1	2705	tags=23%, list=13%, signal=26%
GO_RESPONSE_TO_PEPTIDE_HORMONE	GO_RESPONSE_TO_PEPTIDE_HORMONE		345	0.302805	1.27706	0.107422	0.271847	1	2961	tags=12%, list=14%, signal=14%
GO_CENTROMERE_COMPLEX_ASSEMBLY	GO_CENTROMERE_COMPLEX_ASSEMBLY		53	0.389898	1.27688	0.109127	0.271946	1	8219	tags=53%, list=39%, signal=86%
GO_TRIGLYCERIDE_CATABOLIC_PROCESS	GO_TRIGLYCERIDE_CATABOLIC_PROCESS		18	0.597106	1.27683	0	0.271883	1	1381	tags=22%, list=6%, signal=24%
GO_RESPONSE_TO_ALKALOID	GO_RESPONSE_TO_ALKALOID		79	0.371535	1.27654	0	0.271957	1	1497	tags=11%, list=7%, signal=12%
GO_REGULATION_OF_EXIT_FROM_MITOSIS	GO_REGULATION_OF_EXIT_FROM_MITOSIS		17	0.564499	1.27653	0.1875	0.271779	1	2842	tags=18%, list=13%, signal=20%
GO_INTEGRAL_COMPONENT_OF_SYNAPTIC_VESICLE_MEMBRANE	GO_INTEGRAL_COMPONENT_OF_SYNAPTIC_VESICLE_MEMBRANE		29	0.486559	1.27625	0	0.272061	1	599	tags=17%, list=3%, signal=18%
GO_ORGANIC_HYDROXY_COMPOUND_METABOLIC_PROCESS	GO_ORGANIC_HYDROXY_COMPOUND_METABOLIC_PROCESS		378	0.318729	1.27618	0	0.271982	1	2414	tags=11%, list=11%, signal=13%
GO_POSITIVE_REGULATION_OF_EPITHELIAL_CELL_APOPTOTIC_PROCESS	GO_POSITIVE_REGULATION_OF_EPITHELIAL_CELL_APOPTOTIC_PROCESS		24	0.700889	1.27612	0	0.271805	1	2414	tags=25%, list=11%, signal=28%
GO_GLUTAMATE_RECEPTOR_BINDING	GO_GLUTAMATE_RECEPTOR_BINDING		44	0.400801	1.27579	0	0.271996	1	2606	tags=16%, list=12%, signal=18%
GO_POSITIVE_REGULATION_OF_MYELOID_LEUKOCYTE_CYTOKINE_PRODUCTION_INVOLVED_IN_IMMUNE_RESPONSE	GO_POSITIVE_REGULATION_OF_MYELOID_LEUKOCYTE_CYTOKINE_PRODUCTION_INVOLVED_IN_IMMUNE_RESPONSE		17	0.62924	1.27506	0	0.273123	1	1133	tags=35%, list=5%, signal=37%
GO_TUMOR_NECROSIS_FACTOR_SUPERFAMILY_CYTOKINE_PRODUCTION	GO_TUMOR_NECROSIS_FACTOR_SUPERFAMILY_CYTOKINE_PRODUCTION		98	0.464978	1.27506	0	0.272945	1	2712	tags=27%, list=13%, signal=30%
GO_REGULATION_OF_PEPTIDASE_ACTIVITY	GO_REGULATION_OF_PEPTIDASE_ACTIVITY		308	0.31416	1.27479	0	0.273054	1	3161	tags=15%, list=15%, signal=18%
GO_LYMPHANGIOGENESIS	GO_LYMPHANGIOGENESIS		15	0.669136	1.27471	0.111328	0.27298	1	3030	tags=40%, list=14%, signal=47%
GO_CATION_CATION_ANTIPORTER_ACTIVITY	GO_CATION_CATION_ANTIPORTER_ACTIVITY		23	0.591399	1.2742	0.227823	0.27347	1	2787	tags=43%, list=13%, signal=50%
GO_SODIUM_ION_TRANSPORT	GO_SODIUM_ION_TRANSPORT		170	0.355785	1.27412	0	0.273405	1	2787	tags=20%, list=13%, signal=23%
GO_TERTIARY_GRANULE	GO_TERTIARY_GRANULE		116	0.422116	1.27406	0.102	0.273359	1	3436	tags=22%, list=16%, signal=26%
GO_LIPID_STORAGE	GO_LIPID_STORAGE		54	0.459411	1.27367	0	0.273913	1	4291	tags=28%, list=20%, signal=35%
GO_RHO_GUANYL_NUCLEOTIDE_EXCHANGE_FACTOR_ACTIVITY	GO_RHO_GUANYL_NUCLEOTIDE_EXCHANGE_FACTOR_ACTIVITY		71	0.371648	1.27333	0	0.274212	1	4300	tags=24%, list=20%, signal=30%
GO_STEROL_TRANSPORT	GO_STEROL_TRANSPORT		75	0.44531	1.27332	0.219124	0.274132	1	5134	tags=33%, list=24%, signal=44%
GO_RESPONSE_TO_COCAINE	GO_RESPONSE_TO_COCAINE		35	0.490693	1.27327	0	0.274011	1	1497	tags=17%, list=7%, signal=18%
GO_MYELOID_CELL_APOPTOTIC_PROCESS	GO_MYELOID_CELL_APOPTOTIC_PROCESS		25	0.533057	1.27324	0.0917969	0.273834	1	3025	tags=20%, list=14%, signal=23%
GO_PHOSPHATASE_INHIBITOR_ACTIVITY	GO_PHOSPHATASE_INHIBITOR_ACTIVITY		36	0.465273	1.2732	0	0.273657	1	2613	tags=19%, list=12%, signal=22%
GO_DETECTION_OF_MECHANICAL_STIMULUS	GO_DETECTION_OF_MECHANICAL_STIMULUS		30	0.470534	1.27311	0.10099	0.273662	1	2594	tags=30%, list=12%, signal=34%
GO_REGULATION_OF_PROTEASOMAL_UBIQUITIN_DEPENDENT_PROTEIN_CATABOLIC_PROCESS	GO_REGULATION_OF_PROTEASOMAL_UBIQUITIN_DEPENDENT_PROTEIN_CATABOLIC_PROCESS		114	0.269241	1.27282	0.2167	0.273783	1	142	tags=2%, list=1%, signal=2%
GO_SH3_SH2_ADAPTOR_ACTIVITY	GO_SH3_SH2_ADAPTOR_ACTIVITY		44	0.511422	1.27266	0	0.27376	1	3344	tags=25%, list=16%, signal=30%
GO_POSITIVE_REGULATION_OF_LIPID_STORAGE	GO_POSITIVE_REGULATION_OF_LIPID_STORAGE		16	0.653541	1.27228	0.111328	0.273945	1	4626	tags=44%, list=22%, signal=56%
GO_LACTATION	GO_LACTATION		43	0.363282	1.27221	0.195519	0.273825	1	1664	tags=12%, list=8%, signal=13%
GO_PHOSPHOLIPID_METABOLIC_PROCESS	GO_PHOSPHOLIPID_METABOLIC_PROCESS		212	0.276497	1.272	0	0.27392	1	3351	tags=15%, list=16%, signal=17%
GO_SYNAPTIC_TRANSMISSION_GABAERGIC	GO_SYNAPTIC_TRANSMISSION_GABAERGIC		33	0.434378	1.27174	0.189555	0.274001	1	1474	tags=18%, list=7%, signal=20%
GO_ATP_HYDROLYSIS_COUPLED_CATION_TRANSMEMBRANE_TRANSPORT	GO_ATP_HYDROLYSIS_COUPLED_CATION_TRANSMEMBRANE_TRANSPORT		38	0.473234	1.27164	0.112648	0.274015	1	2449	tags=13%, list=11%, signal=15%
GO_INTERLEUKIN_13_PRODUCTION	GO_INTERLEUKIN_13_PRODUCTION		15	0.512446	1.27133	0.0923379	0.274226	1	559	tags=20%, list=3%, signal=21%
GO_NEGATIVE_REGULATION_OF_CD4_POSITIVE_ALPHA_BETA_T_CELL_ACTIVATION	GO_NEGATIVE_REGULATION_OF_CD4_POSITIVE_ALPHA_BETA_T_CELL_ACTIVATION		23	0.612092	1.27127	0.107422	0.274134	1	4593	tags=57%, list=22%, signal=72%
GO_UNSATURATED_FATTY_ACID_BIOSYNTHETIC_PROCESS	GO_UNSATURATED_FATTY_ACID_BIOSYNTHETIC_PROCESS		37	0.529374	1.27122	0	0.274052	1	2490	tags=24%, list=12%, signal=27%
GO_ATPASE_ACTIVITY	GO_ATPASE_ACTIVITY		383	0.251046	1.27115	0	0.273955	1	2550	tags=7%, list=12%, signal=8%
GO_NEGATIVE_REGULATION_OF_ADAPTIVE_IMMUNE_RESPONSE	GO_NEGATIVE_REGULATION_OF_ADAPTIVE_IMMUNE_RESPONSE		29	0.512776	1.27102	0	0.274092	1	2778	tags=38%, list=13%, signal=44%
GO_ANKYRIN_BINDING	GO_ANKYRIN_BINDING		15	0.462395	1.27092	0	0.274001	1	422	tags=13%, list=2%, signal=14%
GO_NEGATIVE_REGULATION_OF_COAGULATION	GO_NEGATIVE_REGULATION_OF_COAGULATION		37	0.455484	1.27011	0	0.274968	1	2818	tags=27%, list=13%, signal=31%
GO_EXTRINSIC_COMPONENT_OF_MEMBRANE	GO_EXTRINSIC_COMPONENT_OF_MEMBRANE		242	0.312854	1.27	0	0.275116	1	2712	tags=12%, list=13%, signal=14%
GO_REGULATION_OF_DIGESTIVE_SYSTEM_PROCESS	GO_REGULATION_OF_DIGESTIVE_SYSTEM_PROCESS		22	0.496369	1.26999	0.116601	0.274941	1	1961	tags=23%, list=9%, signal=25%
GO_ORGANIC_ACID_SODIUM_SYMPORTER_ACTIVITY	GO_ORGANIC_ACID_SODIUM_SYMPORTER_ACTIVITY		16	0.661484	1.26993	0	0.274834	1	2192	tags=38%, list=10%, signal=42%
GO_PHOSPHATIDYLSERINE_BINDING	GO_PHOSPHATIDYLSERINE_BINDING		48	0.39168	1.26928	0	0.275749	1	1073	tags=15%, list=5%, signal=15%
GO_REGULATION_OF_CATION_TRANSMEMBRANE_TRANSPORT	GO_REGULATION_OF_CATION_TRANSMEMBRANE_TRANSPORT		249	0.349995	1.26873	0	0.276345	1	2636	tags=20%, list=12%, signal=22%
GO_REGULATION_OF_CHROMOSOME_SEGREGATION	GO_REGULATION_OF_CHROMOSOME_SEGREGATION		97	0.306361	1.26868	0	0.276216	1	8116	tags=33%, list=38%, signal=53%
GO_ENDOCARDIAL_CUSHION_DEVELOPMENT	GO_ENDOCARDIAL_CUSHION_DEVELOPMENT		42	0.40303	1.26868	0	0.27604	1	895	tags=10%, list=4%, signal=10%
GO_POSTSYNAPTIC_MEMBRANE	GO_POSTSYNAPTIC_MEMBRANE		272	0.341858	1.26809	0	0.276896	1	1562	tags=15%, list=7%, signal=16%
GO_RESPONSE_TO_COPPER_ION	GO_RESPONSE_TO_COPPER_ION		28	0.456457	1.26804	0.207585	0.276834	1	3623	tags=21%, list=17%, signal=26%
GO_TRANSFERASE_COMPLEX_TRANSFERRING_PHOSPHORUS_CONTAINING_GROUPS	GO_TRANSFERASE_COMPLEX_TRANSFERRING_PHOSPHORUS_CONTAINING_GROUPS		238	0.193045	1.26759	0.0955285	0.277323	1	2932	tags=6%, list=14%, signal=7%
GO_ARP2_3_COMPLEX_MEDIATED_ACTIN_NUCLEATION	GO_ARP2_3_COMPLEX_MEDIATED_ACTIN_NUCLEATION		36	0.416471	1.26747	0.316832	0.277478	1	2288	tags=8%, list=11%, signal=9%
GO_REGULATION_OF_CHROMATIN_SILENCING	GO_REGULATION_OF_CHROMATIN_SILENCING		27	0.434561	1.2671	0.0917969	0.277357	1	358	tags=4%, list=2%, signal=4%
GO_REGULATION_OF_ALPHA_BETA_T_CELL_ACTIVATION	GO_REGULATION_OF_ALPHA_BETA_T_CELL_ACTIVATION		68	0.474787	1.26706	0.108987	0.277261	1	4164	tags=34%, list=20%, signal=42%
GO_NEGATIVE_REGULATION_OF_LYMPHOCYTE_DIFFERENTIATION	GO_NEGATIVE_REGULATION_OF_LYMPHOCYTE_DIFFERENTIATION		38	0.506956	1.26663	0	0.277493	1	4593	tags=47%, list=22%, signal=60%
GO_EXTRINSIC_COMPONENT_OF_ORGANELLE_MEMBRANE	GO_EXTRINSIC_COMPONENT_OF_ORGANELLE_MEMBRANE		43	0.27096	1.26635	0	0.277914	1	2712	tags=9%, list=13%, signal=11%
GO_LEADING_EDGE_MEMBRANE	GO_LEADING_EDGE_MEMBRANE		149	0.333941	1.26616	0	0.278024	1	2917	tags=18%, list=14%, signal=21%
GO_NCRNA_PROCESSING	GO_NCRNA_PROCESSING		357	0.238888	1.26603	0.103659	0.278033	1	8034	tags=36%, list=38%, signal=57%
GO_REGULATION_OF_CARDIAC_CONDUCTION	GO_REGULATION_OF_CARDIAC_CONDUCTION		57	0.352234	1.26598	0	0.277857	1	2787	tags=19%, list=13%, signal=22%
GO_FOREBRAIN_NEURON_DEVELOPMENT	GO_FOREBRAIN_NEURON_DEVELOPMENT		28	0.507534	1.26595	0	0.277737	1	362	tags=11%, list=2%, signal=11%
GO_RESPONSE_TO_ACID_CHEMICAL	GO_RESPONSE_TO_ACID_CHEMICAL		281	0.301807	1.26594	0	0.277562	1	2712	tags=13%, list=13%, signal=15%
GO_DEVELOPMENT_OF_PRIMARY_SEXUAL_CHARACTERISTICS	GO_DEVELOPMENT_OF_PRIMARY_SEXUAL_CHARACTERISTICS		186	0.305834	1.2659	0	0.277434	1	3030	tags=16%, list=14%, signal=18%
GO_CELLULAR_RESPONSE_TO_PEPTIDE_HORMONE_STIMULUS	GO_CELLULAR_RESPONSE_TO_PEPTIDE_HORMONE_STIMULUS		257	0.2976	1.2659	0.104762	0.277259	1	3790	tags=15%, list=18%, signal=18%
GO_CHROMATIN_DNA_BINDING	GO_CHROMATIN_DNA_BINDING		103	0.2969	1.26589	0.112648	0.277085	1	1511	tags=8%, list=7%, signal=8%
GO_MYELIN_ASSEMBLY	GO_MYELIN_ASSEMBLY		19	0.412013	1.26541	0	0.277598	1	1132	tags=11%, list=5%, signal=11%
GO_MICROBODY_PART	GO_MICROBODY_PART		91	0.328776	1.26538	0	0.277424	1	2567	tags=12%, list=12%, signal=14%
GO_T_CELL_MIGRATION	GO_T_CELL_MIGRATION		36	0.657532	1.26509	0	0.277563	1	2653	tags=42%, list=12%, signal=48%
GO_EXPLORATION_BEHAVIOR	GO_EXPLORATION_BEHAVIOR		19	0.600772	1.26496	0	0.277702	1	1209	tags=26%, list=6%, signal=28%
GO_PROTEIN_DEPHOSPHORYLATION	GO_PROTEIN_DEPHOSPHORYLATION		279	0.24777	1.26473	0	0.277919	1	2988	tags=10%, list=14%, signal=12%
GO_CHONDROCYTE_DEVELOPMENT_INVOLVED_IN_ENDOCHONDRAL_BONE_MORPHOGENESIS	GO_CHONDROCYTE_DEVELOPMENT_INVOLVED_IN_ENDOCHONDRAL_BONE_MORPHOGENESIS		19	0.49538	1.26448	0.10119	0.278121	1	3108	tags=26%, list=15%, signal=31%
GO_ORGANELLE_SUBCOMPARTMENT	GO_ORGANELLE_SUBCOMPARTMENT		326	0.247895	1.26422	0	0.278206	1	2129	tags=5%, list=10%, signal=6%
GO_REGULATION_OF_PROTEIN_DEPOLYMERIZATION	GO_REGULATION_OF_PROTEIN_DEPOLYMERIZATION		73	0.427947	1.26347	0.109562	0.279137	1	2633	tags=15%, list=12%, signal=17%
GO_PHOSPHATIDYLINOSITOL_3_KINASE_SIGNALING	GO_PHOSPHATIDYLINOSITOL_3_KINASE_SIGNALING		120	0.354422	1.26333	0	0.279062	1	1766	tags=16%, list=8%, signal=17%
GO_NEGATIVE_REGULATION_OF_TRANSPORTER_ACTIVITY	GO_NEGATIVE_REGULATION_OF_TRANSPORTER_ACTIVITY		59	0.484883	1.2633	0.208984	0.278887	1	4131	tags=34%, list=19%, signal=42%
GO_VASCULAR_ENDOTHELIAL_GROWTH_FACTOR_RECEPTOR_SIGNALING_PATHWAY	GO_VASCULAR_ENDOTHELIAL_GROWTH_FACTOR_RECEPTOR_SIGNALING_PATHWAY		83	0.357326	1.26294	0	0.279297	1	1122	tags=8%, list=5%, signal=9%
GO_POSITIVE_REGULATION_OF_PROTEOLYSIS	GO_POSITIVE_REGULATION_OF_PROTEOLYSIS		295	0.260383	1.26292	0	0.279213	1	3142	tags=11%, list=15%, signal=12%
GO_NEGATIVE_REGULATION_OF_PEPTIDE_SECRETION	GO_NEGATIVE_REGULATION_OF_PEPTIDE_SECRETION		94	0.386607	1.26277	0.086785	0.27947	1	1497	tags=14%, list=7%, signal=15%
GO_MICROVILLUS	GO_MICROVILLUS		63	0.538669	1.26276	0	0.279296	1	1483	tags=21%, list=7%, signal=22%
GO_BASEMENT_MEMBRANE	GO_BASEMENT_MEMBRANE		85	0.411453	1.26275	0.11412	0.279122	1	3011	tags=19%, list=14%, signal=22%
GO_EMBRYO_IMPLANTATION	GO_EMBRYO_IMPLANTATION		39	0.430849	1.26226	0.211934	0.279497	1	44	tags=5%, list=0%, signal=5%
GO_MICROTUBULE_BINDING	GO_MICROTUBULE_BINDING		219	0.322631	1.26218	0.104	0.279389	1	2258	tags=9%, list=11%, signal=10%
GO_ADENYLATE_CYCLASE_INHIBITING_G_PROTEIN_COUPLED_RECEPTOR_SIGNALING_PATHWAY	GO_ADENYLATE_CYCLASE_INHIBITING_G_PROTEIN_COUPLED_RECEPTOR_SIGNALING_PATHWAY		57	0.438441	1.26205	0.107422	0.279384	1	1593	tags=19%, list=7%, signal=21%
GO_POSITIVE_REGULATION_OF_SYNAPTIC_TRANSMISSION_GLUTAMATERGIC	GO_POSITIVE_REGULATION_OF_SYNAPTIC_TRANSMISSION_GLUTAMATERGIC		26	0.425913	1.26201	0	0.279265	1	951	tags=23%, list=4%, signal=24%
GO_SOLUTE_CATION_ANTIPORTER_ACTIVITY	GO_SOLUTE_CATION_ANTIPORTER_ACTIVITY		29	0.525952	1.26177	0.227823	0.279617	1	2787	tags=34%, list=13%, signal=40%
GO_SKELETAL_SYSTEM_DEVELOPMENT	GO_SKELETAL_SYSTEM_DEVELOPMENT		442	0.280689	1.26112	0	0.280771	1	2018	tags=11%, list=9%, signal=12%
GO_INSULIN_SECRETION_INVOLVED_IN_CELLULAR_RESPONSE_TO_GLUCOSE_STIMULUS	GO_INSULIN_SECRETION_INVOLVED_IN_CELLULAR_RESPONSE_TO_GLUCOSE_STIMULUS		57	0.384209	1.26101	0.103586	0.280651	1	1815	tags=14%, list=9%, signal=15%
GO_RHYTHMIC_PROCESS	GO_RHYTHMIC_PROCESS		235	0.285354	1.26096	0	0.280575	1	2135	tags=10%, list=10%, signal=11%
GO_SENSORY_SYSTEM_DEVELOPMENT	GO_SENSORY_SYSTEM_DEVELOPMENT		308	0.322182	1.26052	0	0.281124	1	2709	tags=15%, list=13%, signal=17%
GO_NEGATIVE_REGULATION_OF_CELL_CELL_ADHESION	GO_NEGATIVE_REGULATION_OF_CELL_CELL_ADHESION		117	0.493858	1.25985	0	0.281786	1	4164	tags=35%, list=20%, signal=43%
GO_RECEPTOR_MEDIATED_ENDOCYTOSIS	GO_RECEPTOR_MEDIATED_ENDOCYTOSIS		231	0.360946	1.25951	0	0.282318	1	1664	tags=13%, list=8%, signal=14%
GO_REGULATION_OF_BODY_FLUID_LEVELS	GO_REGULATION_OF_BODY_FLUID_LEVELS		382	0.315601	1.25947	0	0.282144	1	1719	tags=12%, list=8%, signal=13%
GO_CHROMATIN_REMODELING_AT_CENTROMERE	GO_CHROMATIN_REMODELING_AT_CENTROMERE		45	0.401818	1.25942	0.109127	0.281969	1	8219	tags=56%, list=39%, signal=90%
GO_ACUTE_PHASE_RESPONSE	GO_ACUTE_PHASE_RESPONSE		24	0.527185	1.25926	0.273438	0.282025	1	3757	tags=50%, list=18%, signal=61%
GO_PROTON_TRANSPORTING_V_TYPE_ATPASE_COMPLEX	GO_PROTON_TRANSPORTING_V_TYPE_ATPASE_COMPLEX		23	0.462992	1.25919	0.307544	0.28197	1	3392	tags=17%, list=16%, signal=21%
GO_CELLULAR_RESPONSE_TO_DRUG	GO_CELLULAR_RESPONSE_TO_DRUG		293	0.298363	1.25917	0	0.281889	1	3288	tags=16%, list=15%, signal=18%
GO_CHROMATIN_REMODELING	GO_CHROMATIN_REMODELING		156	0.265702	1.25896	0	0.28205	1	7826	tags=37%, list=37%, signal=57%
GO_POSITIVE_REGULATION_OF_TRANSFORMING_GROWTH_FACTOR_BETA_PRODUCTION	GO_POSITIVE_REGULATION_OF_TRANSFORMING_GROWTH_FACTOR_BETA_PRODUCTION		17	0.42136	1.25892	0	0.281876	1	2818	tags=24%, list=13%, signal=27%
GO_COLLATERAL_SPROUTING	GO_COLLATERAL_SPROUTING		25	0.432168	1.25831	0	0.282871	1	998	tags=12%, list=5%, signal=13%
GO_NUCLEOSIDE_DIPHOSPHATE_KINASE_ACTIVITY	GO_NUCLEOSIDE_DIPHOSPHATE_KINASE_ACTIVITY		18	0.474064	1.25819	0.104938	0.282777	1	2164	tags=17%, list=10%, signal=19%
GO_POSITIVE_REGULATION_OF_OXIDOREDUCTASE_ACTIVITY	GO_POSITIVE_REGULATION_OF_OXIDOREDUCTASE_ACTIVITY		45	0.389946	1.25799	0	0.282915	1	843	tags=9%, list=4%, signal=9%
GO_RESPONSE_TO_ALCOHOL	GO_RESPONSE_TO_ALCOHOL		179	0.344865	1.25799	0.110251	0.282741	1	2459	tags=12%, list=12%, signal=14%
GO_MONOSACCHARIDE_BIOSYNTHETIC_PROCESS	GO_MONOSACCHARIDE_BIOSYNTHETIC_PROCESS		78	0.417119	1.25797	0.11753	0.282568	1	2155	tags=9%, list=10%, signal=10%
GO_MAINTENANCE_OF_PROTEIN_LOCATION	GO_MAINTENANCE_OF_PROTEIN_LOCATION		98	0.31088	1.25741	0	0.28324	1	4362	tags=16%, list=20%, signal=20%
GO_HETEROTRIMERIC_G_PROTEIN_COMPLEX	GO_HETEROTRIMERIC_G_PROTEIN_COMPLEX		23	0.485222	1.25737	0.0833333	0.283105	1	3507	tags=22%, list=16%, signal=26%
GO_CYSTEINE_TYPE_ENDOPEPTIDASE_ACTIVITY	GO_CYSTEINE_TYPE_ENDOPEPTIDASE_ACTIVITY		74	0.369385	1.25736	0.124498	0.282932	1	5781	tags=27%, list=27%, signal=37%
GO_RESPONSE_TO_BMP	GO_RESPONSE_TO_BMP		127	0.331659	1.25727	0.0866142	0.282801	1	929	tags=8%, list=4%, signal=8%
GO_POSITIVE_REGULATION_OF_INTERLEUKIN_4_PRODUCTION	GO_POSITIVE_REGULATION_OF_INTERLEUKIN_4_PRODUCTION		16	0.637288	1.25704	0.213115	0.282932	1	1559	tags=38%, list=7%, signal=40%
GO_TOLL_LIKE_RECEPTOR_3_SIGNALING_PATHWAY	GO_TOLL_LIKE_RECEPTOR_3_SIGNALING_PATHWAY		18	0.634404	1.25683	0	0.283069	1	4091	tags=39%, list=19%, signal=48%
GO_CIRCULATORY_SYSTEM_PROCESS	GO_CIRCULATORY_SYSTEM_PROCESS		404	0.34464	1.25672	0	0.283207	1	2818	tags=21%, list=13%, signal=24%
GO_HEART_PROCESS	GO_HEART_PROCESS		225	0.342873	1.25668	0	0.283078	1	2787	tags=20%, list=13%, signal=23%
GO_REGULATION_OF_MEMBRANE_REPOLARIZATION	GO_REGULATION_OF_MEMBRANE_REPOLARIZATION		27	0.592844	1.25657	0	0.283048	1	1226	tags=22%, list=6%, signal=24%
GO_PATHWAY_RESTRICTED_SMAD_PROTEIN_PHOSPHORYLATION	GO_PATHWAY_RESTRICTED_SMAD_PROTEIN_PHOSPHORYLATION		54	0.495983	1.25653	0	0.282919	1	4181	tags=39%, list=20%, signal=48%
GO_NEGATIVE_REGULATION_OF_PROTEIN_LOCALIZATION_TO_NUCLEUS	GO_NEGATIVE_REGULATION_OF_PROTEIN_LOCALIZATION_TO_NUCLEUS		23	0.456345	1.25625	0.182163	0.28317	1	1267	tags=13%, list=6%, signal=14%
GO_DECIDUALIZATION	GO_DECIDUALIZATION		19	0.475548	1.25617	0	0.283129	1	1596	tags=11%, list=7%, signal=11%
GO_REGULATION_OF_ACTIN_FILAMENT_BASED_PROCESS	GO_REGULATION_OF_ACTIN_FILAMENT_BASED_PROCESS		332	0.252122	1.25578	0	0.283247	1	2402	tags=11%, list=11%, signal=12%
GO_NUCLEAR_CHROMATIN	GO_NUCLEAR_CHROMATIN		338	0.217005	1.25541	0	0.283937	1	3408	tags=10%, list=16%, signal=11%
GO_NEGATIVE_REGULATION_OF_POTASSIUM_ION_TRANSPORT	GO_NEGATIVE_REGULATION_OF_POTASSIUM_ION_TRANSPORT		20	0.544879	1.25534	0.217899	0.283935	1	805	tags=15%, list=4%, signal=16%
GO_NEGATIVE_REGULATION_OF_LIPID_BIOSYNTHETIC_PROCESS	GO_NEGATIVE_REGULATION_OF_LIPID_BIOSYNTHETIC_PROCESS		40	0.384689	1.25528	0.10251	0.283807	1	895	tags=8%, list=4%, signal=8%
GO_REGULATION_OF_GLUCONEOGENESIS	GO_REGULATION_OF_GLUCONEOGENESIS		38	0.486647	1.25512	0.114563	0.283871	1	2155	tags=13%, list=10%, signal=15%
GO_POSITIVE_REGULATION_OF_ION_TRANSPORT	GO_POSITIVE_REGULATION_OF_ION_TRANSPORT		199	0.357876	1.25495	0	0.283782	1	2140	tags=18%, list=10%, signal=20%
GO_TAU_PROTEIN_BINDING	GO_TAU_PROTEIN_BINDING		44	0.294313	1.25483	0.0895833	0.283789	1	1031	tags=5%, list=5%, signal=5%
GO_PITUITARY_GLAND_DEVELOPMENT	GO_PITUITARY_GLAND_DEVELOPMENT		35	0.452765	1.25441	0.0827068	0.284236	1	1164	tags=17%, list=5%, signal=18%
GO_ANCHORED_COMPONENT_OF_MEMBRANE	GO_ANCHORED_COMPONENT_OF_MEMBRANE		105	0.430443	1.25417	0	0.284367	1	1974	tags=22%, list=9%, signal=24%
GO_REGULATION_OF_T_CELL_MEDIATED_CYTOTOXICITY	GO_REGULATION_OF_T_CELL_MEDIATED_CYTOTOXICITY		19	0.565358	1.25414	0	0.284195	1	1865	tags=21%, list=9%, signal=23%
GO_REGULATION_OF_CELL_ADHESION_MEDIATED_BY_INTEGRIN	GO_REGULATION_OF_CELL_ADHESION_MEDIATED_BY_INTEGRIN		38	0.533719	1.2541	0.0758755	0.28412	1	2613	tags=26%, list=12%, signal=30%
GO_POSITIVE_REGULATION_OF_MACROAUTOPHAGY	GO_POSITIVE_REGULATION_OF_MACROAUTOPHAGY		62	0.252088	1.25364	0.0917969	0.284576	1	2129	tags=10%, list=10%, signal=11%
GO_NEGATIVE_REGULATION_OF_CELLULAR_CATABOLIC_PROCESS	GO_NEGATIVE_REGULATION_OF_CELLULAR_CATABOLIC_PROCESS		210	0.248342	1.25333	0.0778443	0.284948	1	2535	tags=7%, list=12%, signal=7%
GO_CYTOKINE_SECRETION_INVOLVED_IN_IMMUNE_RESPONSE	GO_CYTOKINE_SECRETION_INVOLVED_IN_IMMUNE_RESPONSE		15	0.614807	1.25322	0.203125	0.284925	1	1381	tags=27%, list=6%, signal=28%
GO_CELLULAR_HORMONE_METABOLIC_PROCESS	GO_CELLULAR_HORMONE_METABOLIC_PROCESS		66	0.416053	1.25313	0.0938124	0.284972	1	1030	tags=15%, list=5%, signal=16%
GO_INOSITOL_LIPID_MEDIATED_SIGNALING	GO_INOSITOL_LIPID_MEDIATED_SIGNALING		154	0.345035	1.25303	0	0.284884	1	1766	tags=14%, list=8%, signal=15%
GO_POSITIVE_REGULATION_OF_PROTEIN_KINASE_B_SIGNALING	GO_POSITIVE_REGULATION_OF_PROTEIN_KINASE_B_SIGNALING		127	0.397986	1.25298	0	0.284852	1	3538	tags=24%, list=17%, signal=29%
GO_JNK_CASCADE	GO_JNK_CASCADE		176	0.306302	1.25262	0	0.285201	1	3349	tags=15%, list=16%, signal=18%
GO_ALPHA_BETA_T_CELL_PROLIFERATION	GO_ALPHA_BETA_T_CELL_PROLIFERATION		25	0.528089	1.25259	0	0.285029	1	559	tags=16%, list=3%, signal=16%
GO_PLATELET_AGGREGATION	GO_PLATELET_AGGREGATION		46	0.35217	1.25242	0.178846	0.285164	1	1184	tags=11%, list=6%, signal=11%
GO_NEUROPILIN_BINDING	GO_NEUROPILIN_BINDING		19	0.406871	1.25235	0	0.284993	1	1577	tags=21%, list=7%, signal=23%
GO_CYTOSOLIC_PART	GO_CYTOSOLIC_PART		217	0.259861	1.25206	0.185629	0.285593	1	8031	tags=45%, list=38%, signal=71%
GO_CHROMOSOMAL_REGION	GO_CHROMOSOMAL_REGION		326	0.217121	1.2518	0.104762	0.285717	1	8314	tags=34%, list=39%, signal=55%
GO_BONE_REMODELING	GO_BONE_REMODELING		68	0.377053	1.25174	0.115234	0.285545	1	3133	tags=24%, list=15%, signal=27%
GO_B_CELL_RECEPTOR_SIGNALING_PATHWAY	GO_B_CELL_RECEPTOR_SIGNALING_PATHWAY		40	0.484503	1.25161	0	0.285625	1	4099	tags=38%, list=19%, signal=46%
GO_REGULATION_OF_GLUCOSE_TRANSMEMBRANE_TRANSPORT	GO_REGULATION_OF_GLUCOSE_TRANSMEMBRANE_TRANSPORT		62	0.367407	1.25152	0	0.285506	1	847	tags=8%, list=4%, signal=8%
GO_REGULATION_OF_CELLULAR_EXTRAVASATION	GO_REGULATION_OF_CELLULAR_EXTRAVASATION		15	0.634813	1.25114	0.0758755	0.285998	1	2140	tags=40%, list=10%, signal=44%
GO_AMINE_TRANSPORT	GO_AMINE_TRANSPORT		67	0.416131	1.25066	0	0.28673	1	2198	tags=31%, list=10%, signal=35%
GO_MATERNAL_PROCESS_INVOLVED_IN_FEMALE_PREGNANCY	GO_MATERNAL_PROCESS_INVOLVED_IN_FEMALE_PREGNANCY		49	0.355081	1.25051	0	0.286841	1	2053	tags=10%, list=10%, signal=11%
GO_PYRIDINE_CONTAINING_COMPOUND_METABOLIC_PROCESS	GO_PYRIDINE_CONTAINING_COMPOUND_METABOLIC_PROCESS		35	0.37694	1.25046	0	0.286704	1	1743	tags=17%, list=8%, signal=19%
GO_NEGATIVE_REGULATION_OF_REPRODUCTIVE_PROCESS	GO_NEGATIVE_REGULATION_OF_REPRODUCTIVE_PROCESS		41	0.393672	1.25042	0	0.286572	1	895	tags=15%, list=4%, signal=15%
GO_REGULATION_OF_CHEMOTAXIS	GO_REGULATION_OF_CHEMOTAXIS		152	0.377056	1.25029	0	0.286592	1	2995	tags=23%, list=14%, signal=27%
GO_POSITIVE_REGULATION_OF_DEPHOSPHORYLATION	GO_POSITIVE_REGULATION_OF_DEPHOSPHORYLATION		45	0.301081	1.25009	0.297405	0.28682	1	2551	tags=11%, list=12%, signal=13%
GO_AMMONIUM_TRANSPORT	GO_AMMONIUM_TRANSPORT		78	0.411527	1.24991	0	0.287199	1	1893	tags=23%, list=9%, signal=25%
GO_INTRINSIC_COMPONENT_OF_PRESYNAPTIC_ACTIVE_ZONE_MEMBRANE	GO_INTRINSIC_COMPONENT_OF_PRESYNAPTIC_ACTIVE_ZONE_MEMBRANE		16	0.428241	1.24976	0.177083	0.287204	1	759	tags=19%, list=4%, signal=19%
GO_SENSORY_PERCEPTION_OF_MECHANICAL_STIMULUS	GO_SENSORY_PERCEPTION_OF_MECHANICAL_STIMULUS		129	0.392162	1.24973	0.11501	0.287239	1	2830	tags=22%, list=13%, signal=26%
GO_NADP_BINDING	GO_NADP_BINDING		42	0.279415	1.24964	0.0963115	0.287156	1	2758	tags=12%, list=13%, signal=14%
GO_POSITIVE_REGULATION_OF_CYTOKINE_PRODUCTION_INVOLVED_IN_IMMUNE_RESPONSE	GO_POSITIVE_REGULATION_OF_CYTOKINE_PRODUCTION_INVOLVED_IN_IMMUNE_RESPONSE		44	0.555329	1.24938	0	0.287542	1	1133	tags=23%, list=5%, signal=24%
GO_T_CELL_MEDIATED_IMMUNITY	GO_T_CELL_MEDIATED_IMMUNITY		74	0.377729	1.2489	0.0990476	0.287959	1	3572	tags=23%, list=17%, signal=27%
GO_TOXIN_METABOLIC_PROCESS	GO_TOXIN_METABOLIC_PROCESS		16	0.622409	1.24869	0	0.288101	1	1830	tags=31%, list=9%, signal=34%
GO_MESENCHYME_DEVELOPMENT	GO_MESENCHYME_DEVELOPMENT		245	0.344405	1.24832	0	0.288182	1	1281	tags=9%, list=6%, signal=10%
GO_PROTON_TRANSPORTING_TWO_SECTOR_ATPASE_COMPLEX	GO_PROTON_TRANSPORTING_TWO_SECTOR_ATPASE_COMPLEX		26	0.455768	1.24797	0.32449	0.288794	1	3392	tags=15%, list=16%, signal=18%
GO_EPHRIN_RECEPTOR_SIGNALING_PATHWAY	GO_EPHRIN_RECEPTOR_SIGNALING_PATHWAY		81	0.428008	1.24764	0	0.289107	1	5607	tags=35%, list=26%, signal=47%
GO_MODIFICATION_OF_SYNAPTIC_STRUCTURE	GO_MODIFICATION_OF_SYNAPTIC_STRUCTURE		21	0.44627	1.24751	0	0.289152	1	2535	tags=14%, list=12%, signal=16%
GO_NEURON_PROJECTION_ORGANIZATION	GO_NEURON_PROJECTION_ORGANIZATION		81	0.335205	1.24695	0.10099	0.290363	1	3091	tags=15%, list=14%, signal=17%
GO_NEGATIVE_REGULATION_OF_BLOOD_VESSEL_ENDOTHELIAL_CELL_MIGRATION	GO_NEGATIVE_REGULATION_OF_BLOOD_VESSEL_ENDOTHELIAL_CELL_MIGRATION		27	0.407253	1.24686	0.116327	0.290374	1	495	tags=7%, list=2%, signal=8%
GO_NUCLEAR_NUCLEOSOME	GO_NUCLEAR_NUCLEOSOME		31	0.678621	1.24678	0	0.290337	1	1754	tags=16%, list=8%, signal=18%
GO_AMINO_ACID_TRANSPORT	GO_AMINO_ACID_TRANSPORT		116	0.335488	1.24627	0	0.291	1	2198	tags=17%, list=10%, signal=19%
GO_RESPONSE_TO_OXIDATIVE_STRESS	GO_RESPONSE_TO_OXIDATIVE_STRESS		371	0.26201	1.24616	0	0.291	1	3247	tags=12%, list=15%, signal=14%
GO_G_PROTEIN_COUPLED_NEUROTRANSMITTER_RECEPTOR_ACTIVITY	GO_G_PROTEIN_COUPLED_NEUROTRANSMITTER_RECEPTOR_ACTIVITY		19	0.532039	1.24608	0.0943775	0.291115	1	1982	tags=37%, list=9%, signal=41%
GO_PROTEIN_LIPID_COMPLEX_ASSEMBLY	GO_PROTEIN_LIPID_COMPLEX_ASSEMBLY		23	0.514633	1.24577	0.213592	0.291402	1	1641	tags=13%, list=8%, signal=14%
GO_G_PROTEIN_ALPHA_SUBUNIT_BINDING	GO_G_PROTEIN_ALPHA_SUBUNIT_BINDING		16	0.633246	1.24561	0	0.291537	1	2575	tags=25%, list=12%, signal=28%
GO_REGULATION_OF_PHOSPHOLIPID_METABOLIC_PROCESS	GO_REGULATION_OF_PHOSPHOLIPID_METABOLIC_PROCESS		54	0.337933	1.2455	0	0.291636	1	3921	tags=24%, list=18%, signal=29%
GO_GLUTATHIONE_METABOLIC_PROCESS	GO_GLUTATHIONE_METABOLIC_PROCESS		30	0.431171	1.24525	0.1875	0.292031	1	3881	tags=20%, list=18%, signal=24%
GO_POSITIVE_REGULATION_OF_DEFENSE_RESPONSE	GO_POSITIVE_REGULATION_OF_DEFENSE_RESPONSE		354	0.370378	1.24513	0	0.291994	1	2904	tags=17%, list=14%, signal=19%
GO_NCRNA_METABOLIC_PROCESS	GO_NCRNA_METABOLIC_PROCESS		426	0.179255	1.245	0.10099	0.292063	1	8034	tags=35%, list=38%, signal=56%
GO_COLLAGEN_FIBRIL_ORGANIZATION	GO_COLLAGEN_FIBRIL_ORGANIZATION		47	0.405768	1.24489	0.101562	0.292165	1	3030	tags=23%, list=14%, signal=27%
GO_CYTOKINE_PRODUCTION_INVOLVED_IN_IMMUNE_RESPONSE	GO_CYTOKINE_PRODUCTION_INVOLVED_IN_IMMUNE_RESPONSE		77	0.489689	1.24464	0	0.292598	1	2778	tags=27%, list=13%, signal=31%
GO_RESPONSE_TO_PEPTIDE	GO_RESPONSE_TO_PEPTIDE		408	0.286815	1.24449	0.107004	0.292583	1	2961	tags=13%, list=14%, signal=15%
GO_REGULATION_OF_ION_TRANSMEMBRANE_TRANSPORT	GO_REGULATION_OF_ION_TRANSMEMBRANE_TRANSPORT		361	0.335101	1.24447	0	0.292445	1	2915	tags=22%, list=14%, signal=25%
GO_RIBONUCLEOSIDE_TRIPHOSPHATE_BIOSYNTHETIC_PROCESS	GO_RIBONUCLEOSIDE_TRIPHOSPHATE_BIOSYNTHETIC_PROCESS		39	0.327398	1.2443	0.271429	0.292538	1	2164	tags=10%, list=10%, signal=11%
GO_RESPONSE_TO_ANTIBIOTIC	GO_RESPONSE_TO_ANTIBIOTIC		262	0.299808	1.24418	0	0.292827	1	2938	tags=13%, list=14%, signal=15%
GO_CYTOSOLIC_LARGE_RIBOSOMAL_SUBUNIT	GO_CYTOSOLIC_LARGE_RIBOSOMAL_SUBUNIT		59	0.433732	1.24418	0	0.292656	1	9006	tags=71%, list=42%, signal=123%
GO_CARDIAC_MUSCLE_CONTRACTION	GO_CARDIAC_MUSCLE_CONTRACTION		107	0.351968	1.24408	0.106589	0.292552	1	2727	tags=19%, list=13%, signal=21%
GO_BICARBONATE_TRANSMEMBRANE_TRANSPORTER_ACTIVITY	GO_BICARBONATE_TRANSMEMBRANE_TRANSPORTER_ACTIVITY		15	0.50764	1.24404	0	0.292431	1	2084	tags=27%, list=10%, signal=30%
GO_MYELOID_CELL_HOMEOSTASIS	GO_MYELOID_CELL_HOMEOSTASIS		124	0.273706	1.24395	0	0.29241	1	3025	tags=12%, list=14%, signal=14%
GO_PHOSPHORIC_DIESTER_HYDROLASE_ACTIVITY	GO_PHOSPHORIC_DIESTER_HYDROLASE_ACTIVITY		77	0.409615	1.24384	0	0.292392	1	2138	tags=19%, list=10%, signal=22%
GO_RESPONSE_TO_ACTIVITY	GO_RESPONSE_TO_ACTIVITY		48	0.394278	1.24371	0.114563	0.292333	1	799	tags=8%, list=4%, signal=9%
GO_REGULATION_OF_KETONE_BIOSYNTHETIC_PROCESS	GO_REGULATION_OF_KETONE_BIOSYNTHETIC_PROCESS		15	0.534651	1.24368	0.189555	0.292195	1	2572	tags=27%, list=12%, signal=30%
GO_CELL_CELL_JUNCTION	GO_CELL_CELL_JUNCTION		368	0.280298	1.24367	0	0.292074	1	2436	tags=11%, list=11%, signal=12%
GO_ANTIGEN_PROCESSING_AND_PRESENTATION_OF_EXOGENOUS_PEPTIDE_ANTIGEN_VIA_MHC_CLASS_I	GO_ANTIGEN_PROCESSING_AND_PRESENTATION_OF_EXOGENOUS_PEPTIDE_ANTIGEN_VIA_MHC_CLASS_I		72	0.323561	1.24363	0.242	0.292006	1	2518	tags=8%, list=12%, signal=9%
GO_EARLY_ENDOSOME_MEMBRANE	GO_EARLY_ENDOSOME_MEMBRANE		129	0.343729	1.24352	0.102823	0.292263	1	2577	tags=11%, list=12%, signal=12%
GO_TRANSFORMING_GROWTH_FACTOR_BETA_RECEPTOR_SIGNALING_PATHWAY	GO_TRANSFORMING_GROWTH_FACTOR_BETA_RECEPTOR_SIGNALING_PATHWAY		160	0.266471	1.2434	0.125761	0.292376	1	716	tags=4%, list=3%, signal=4%
GO_ALPHA_BETA_T_CELL_DIFFERENTIATION	GO_ALPHA_BETA_T_CELL_DIFFERENTIATION		76	0.429195	1.24338	0	0.292244	1	2778	tags=26%, list=13%, signal=30%
GO_SITE_OF_POLARIZED_GROWTH	GO_SITE_OF_POLARIZED_GROWTH		156	0.293669	1.24328	0.0881148	0.292184	1	2925	tags=11%, list=14%, signal=13%
GO_POSITIVE_REGULATION_OF_CELL_KILLING	GO_POSITIVE_REGULATION_OF_CELL_KILLING		34	0.415603	1.24327	0.104364	0.292056	1	3572	tags=24%, list=17%, signal=28%
GO_NEGATIVE_REGULATION_OF_ANION_TRANSPORT	GO_NEGATIVE_REGULATION_OF_ANION_TRANSPORT		20	0.513575	1.24321	0.11501	0.292014	1	975	tags=20%, list=5%, signal=21%
GO_REGULATION_OF_SODIUM_ION_TRANSMEMBRANE_TRANSPORTER_ACTIVITY	GO_REGULATION_OF_SODIUM_ION_TRANSMEMBRANE_TRANSPORTER_ACTIVITY		43	0.382685	1.2426	0.32233	0.292748	1	2613	tags=16%, list=12%, signal=19%
GO_G_PROTEIN_COUPLED_AMINE_RECEPTOR_ACTIVITY	GO_G_PROTEIN_COUPLED_AMINE_RECEPTOR_ACTIVITY		22	0.575269	1.24228	0	0.293284	1	3728	tags=64%, list=17%, signal=77%
GO_DRUG_CATABOLIC_PROCESS	GO_DRUG_CATABOLIC_PROCESS		69	0.396842	1.24224	0.124	0.293163	1	1521	tags=13%, list=7%, signal=14%
GO_NEGATIVE_REGULATION_OF_DEPHOSPHORYLATION	GO_NEGATIVE_REGULATION_OF_DEPHOSPHORYLATION		90	0.324337	1.24209	0	0.293195	1	1766	tags=8%, list=8%, signal=8%
GO_ASYMMETRIC_CELL_DIVISION	GO_ASYMMETRIC_CELL_DIVISION		16	0.598928	1.24205	0	0.293059	1	4631	tags=25%, list=22%, signal=32%
GO_NEGATIVE_REGULATION_OF_CELL_SUBSTRATE_ADHESION	GO_NEGATIVE_REGULATION_OF_CELL_SUBSTRATE_ADHESION		51	0.301181	1.2415	0	0.294094	1	1392	tags=8%, list=7%, signal=8%
GO_SENSORY_ORGAN_MORPHOGENESIS	GO_SENSORY_ORGAN_MORPHOGENESIS		219	0.34285	1.24143	0	0.293955	1	2702	tags=17%, list=13%, signal=19%
GO_INTRINSIC_COMPONENT_OF_ENDOPLASMIC_RETICULUM_MEMBRANE	GO_INTRINSIC_COMPONENT_OF_ENDOPLASMIC_RETICULUM_MEMBRANE		139	0.263362	1.24131	0.086444	0.293973	1	172	tags=1%, list=1%, signal=1%
GO_BRANCHING_MORPHOGENESIS_OF_AN_EPITHELIAL_TUBE	GO_BRANCHING_MORPHOGENESIS_OF_AN_EPITHELIAL_TUBE		135	0.33838	1.24124	0.086444	0.293839	1	1168	tags=7%, list=5%, signal=8%
GO_REGULATION_OF_CALCIUM_ION_DEPENDENT_EXOCYTOSIS	GO_REGULATION_OF_CALCIUM_ION_DEPENDENT_EXOCYTOSIS		99	0.364587	1.24123	0	0.29367	1	1016	tags=13%, list=5%, signal=14%
GO_MRNA_CLEAVAGE_FACTOR_COMPLEX	GO_MRNA_CLEAVAGE_FACTOR_COMPLEX		20	0.461817	1.24114	0.0996094	0.293676	1	699	tags=5%, list=3%, signal=5%
GO_RNA_METHYLATION	GO_RNA_METHYLATION		76	0.251908	1.24108	0.181641	0.293619	1	7382	tags=32%, list=35%, signal=48%
GO_POSITIVE_REGULATION_OF_INFLAMMATORY_RESPONSE	GO_POSITIVE_REGULATION_OF_INFLAMMATORY_RESPONSE		87	0.385356	1.24103	0	0.29345	1	1164	tags=17%, list=5%, signal=18%
GO_REGULATION_OF_ANION_TRANSMEMBRANE_TRANSPORT	GO_REGULATION_OF_ANION_TRANSMEMBRANE_TRANSPORT		25	0.594396	1.24066	0.107422	0.293987	1	2198	tags=28%, list=10%, signal=31%
GO_SYMPORTER_ACTIVITY	GO_SYMPORTER_ACTIVITY		103	0.435182	1.24066	0.11412	0.293818	1	2241	tags=19%, list=11%, signal=22%
GO_MONOOXYGENASE_ACTIVITY	GO_MONOOXYGENASE_ACTIVITY		55	0.444367	1.24058	0	0.293691	1	1030	tags=18%, list=5%, signal=19%
GO_NEGATIVE_REGULATION_OF_PROTEOLYSIS_INVOLVED_IN_CELLULAR_PROTEIN_CATABOLIC_PROCESS	GO_NEGATIVE_REGULATION_OF_PROTEOLYSIS_INVOLVED_IN_CELLULAR_PROTEIN_CATABOLIC_PROCESS		65	0.370354	1.24052	0.169811	0.293564	1	2535	tags=8%, list=12%, signal=9%
GO_SOMATIC_STEM_CELL_POPULATION_MAINTENANCE	GO_SOMATIC_STEM_CELL_POPULATION_MAINTENANCE		56	0.350268	1.24039	0.086444	0.293721	1	35	tags=4%, list=0%, signal=4%
GO_BODY_FLUID_SECRETION	GO_BODY_FLUID_SECRETION		75	0.348602	1.24033	0	0.293594	1	2135	tags=15%, list=10%, signal=16%
GO_REGULATION_OF_CELL_KILLING	GO_REGULATION_OF_CELL_KILLING		44	0.383078	1.23983	0.104364	0.29416	1	3927	tags=25%, list=18%, signal=31%
GO_C4_DICARBOXYLATE_TRANSPORT	GO_C4_DICARBOXYLATE_TRANSPORT		18	0.56022	1.23981	0.102	0.294041	1	2192	tags=22%, list=10%, signal=25%
GO_NEGATIVE_REGULATION_OF_CELL_ACTIVATION	GO_NEGATIVE_REGULATION_OF_CELL_ACTIVATION		127	0.453033	1.23928	0	0.294609	1	4164	tags=34%, list=20%, signal=42%
GO_DETECTION_OF_MECHANICAL_STIMULUS_INVOLVED_IN_SENSORY_PERCEPTION	GO_DETECTION_OF_MECHANICAL_STIMULUS_INVOLVED_IN_SENSORY_PERCEPTION		21	0.556496	1.23925	0.214425	0.294484	1	2594	tags=38%, list=12%, signal=43%
GO_POSITIVE_REGULATION_OF_AUTOPHAGY	GO_POSITIVE_REGULATION_OF_AUTOPHAGY		106	0.215777	1.23884	0.0985325	0.295026	1	3024	tags=11%, list=14%, signal=13%
GO_CHEMOKINE_PRODUCTION	GO_CHEMOKINE_PRODUCTION		58	0.38041	1.23882	0	0.294899	1	911	tags=12%, list=4%, signal=13%
GO_MICROBODY_LUMEN	GO_MICROBODY_LUMEN		44	0.418458	1.23878	0.125506	0.294731	1	2567	tags=14%, list=12%, signal=15%
GO_MATING	GO_MATING		26	0.436772	1.23874	0.11501	0.294745	1	889	tags=15%, list=4%, signal=16%
GO_DIGESTIVE_SYSTEM_PROCESS	GO_DIGESTIVE_SYSTEM_PROCESS		59	0.440156	1.23854	0.115234	0.294792	1	1961	tags=25%, list=9%, signal=28%
GO_CELL_JUNCTION_ORGANIZATION	GO_CELL_JUNCTION_ORGANIZATION		253	0.265508	1.23842	0.104	0.29479	1	3071	tags=13%, list=14%, signal=15%
GO_EXOCRINE_SYSTEM_DEVELOPMENT	GO_EXOCRINE_SYSTEM_DEVELOPMENT		43	0.3472	1.23839	0.0929791	0.294622	1	1782	tags=12%, list=8%, signal=13%
GO_PROTEIN_LIPID_COMPLEX_BINDING	GO_PROTEIN_LIPID_COMPLEX_BINDING		18	0.64043	1.23827	0.194286	0.294632	1	4291	tags=50%, list=20%, signal=63%
GO_POSITIVE_REGULATION_OF_ALPHA_BETA_T_CELL_ACTIVATION	GO_POSITIVE_REGULATION_OF_ALPHA_BETA_T_CELL_ACTIVATION		44	0.454724	1.23821	0.111328	0.294763	1	2223	tags=20%, list=10%, signal=23%
GO_RIBONUCLEOTIDE_CATABOLIC_PROCESS	GO_RIBONUCLEOTIDE_CATABOLIC_PROCESS		29	0.434619	1.2382	0.0909091	0.294596	1	1521	tags=21%, list=7%, signal=22%
GO_POSTSYNAPTIC_NEUROTRANSMITTER_RECEPTOR_ACTIVITY	GO_POSTSYNAPTIC_NEUROTRANSMITTER_RECEPTOR_ACTIVITY		38	0.46609	1.23781	0.0959184	0.295249	1	1481	tags=24%, list=7%, signal=25%
GO_NEGATIVE_REGULATION_OF_KINASE_ACTIVITY	GO_NEGATIVE_REGULATION_OF_KINASE_ACTIVITY		207	0.221544	1.23777	0.10119	0.295142	1	4388	tags=15%, list=21%, signal=19%
GO_REGULATION_OF_CARTILAGE_DEVELOPMENT	GO_REGULATION_OF_CARTILAGE_DEVELOPMENT		61	0.333225	1.23762	0	0.295105	1	3460	tags=23%, list=16%, signal=27%
GO_CALCIUM_ION_TRANSMEMBRANE_IMPORT_INTO_CYTOSOL	GO_CALCIUM_ION_TRANSMEMBRANE_IMPORT_INTO_CYTOSOL		103	0.326346	1.23753	0.0979167	0.295084	1	2787	tags=17%, list=13%, signal=20%
GO_RENAL_SYSTEM_DEVELOPMENT	GO_RENAL_SYSTEM_DEVELOPMENT		260	0.315056	1.23742	0.104364	0.294988	1	3030	tags=17%, list=14%, signal=20%
GO_STARTLE_RESPONSE	GO_STARTLE_RESPONSE		20	0.489203	1.23735	0.195519	0.294822	1	1933	tags=30%, list=9%, signal=33%
GO_LYMPH_VESSEL_MORPHOGENESIS	GO_LYMPH_VESSEL_MORPHOGENESIS		18	0.631646	1.2373	0.203125	0.294655	1	6443	tags=83%, list=30%, signal=119%
GO_SOLUTE_CATION_SYMPORTER_ACTIVITY	GO_SOLUTE_CATION_SYMPORTER_ACTIVITY		67	0.471228	1.23639	0.11412	0.295405	1	2192	tags=21%, list=10%, signal=23%
GO_UBIQUITIN_LIKE_PROTEIN_TRANSFERASE_ACTIVITY	GO_UBIQUITIN_LIKE_PROTEIN_TRANSFERASE_ACTIVITY		377	0.241521	1.23638	0.194286	0.295238	1	5607	tags=20%, list=26%, signal=26%
GO_NEURON_PROJECTION_REGENERATION	GO_NEURON_PROJECTION_REGENERATION		50	0.450915	1.23636	0.0914397	0.295102	1	2535	tags=20%, list=12%, signal=23%
GO_MEGAKARYOCYTE_DIFFERENTIATION	GO_MEGAKARYOCYTE_DIFFERENTIATION		91	0.333073	1.23634	0	0.294976	1	1754	tags=10%, list=8%, signal=11%
GO_POSITIVE_REGULATION_OF_PROTEIN_LOCALIZATION_TO_NUCLEUS	GO_POSITIVE_REGULATION_OF_PROTEIN_LOCALIZATION_TO_NUCLEUS		67	0.304028	1.2363	0.21875	0.294894	1	2991	tags=7%, list=14%, signal=9%
GO_NEGATIVE_REGULATION_OF_IMMUNE_EFFECTOR_PROCESS	GO_NEGATIVE_REGULATION_OF_IMMUNE_EFFECTOR_PROCESS		80	0.412639	1.23588	0	0.295395	1	2778	tags=20%, list=13%, signal=23%
GO_DNA_REPLICATION_DEPENDENT_NUCLEOSOME_ORGANIZATION	GO_DNA_REPLICATION_DEPENDENT_NUCLEOSOME_ORGANIZATION		31	0.577891	1.23555	0.101562	0.295797	1	7785	tags=61%, list=36%, signal=96%
GO_CLATHRIN_COATED_ENDOCYTIC_VESICLE	GO_CLATHRIN_COATED_ENDOCYTIC_VESICLE		48	0.400224	1.23553	0.232246	0.295708	1	1477	tags=10%, list=7%, signal=11%
GO_C21_STEROID_HORMONE_METABOLIC_PROCESS	GO_C21_STEROID_HORMONE_METABOLIC_PROCESS		28	0.435642	1.2354	0	0.295626	1	772	tags=14%, list=4%, signal=15%
GO_ANION_TRANSMEMBRANE_TRANSPORT	GO_ANION_TRANSMEMBRANE_TRANSPORT		213	0.317798	1.23499	0.0892857	0.296086	1	2328	tags=12%, list=11%, signal=14%
GO_TYPE_2_IMMUNE_RESPONSE	GO_TYPE_2_IMMUNE_RESPONSE		24	0.477905	1.23493	0	0.296079	1	1571	tags=25%, list=7%, signal=27%
GO_CHROMATIN_SILENCING_AT_RDNA	GO_CHROMATIN_SILENCING_AT_RDNA		39	0.58137	1.23488	0.101562	0.296038	1	1754	tags=13%, list=8%, signal=14%
GO_MEMBRANE_DOCKING	GO_MEMBRANE_DOCKING		173	0.198638	1.23482	0	0.296086	1	893	tags=2%, list=4%, signal=2%
GO_CYTOPLASMIC_MICROTUBULE	GO_CYTOPLASMIC_MICROTUBULE		59	0.294815	1.23478	0.10387	0.296063	1	911	tags=3%, list=4%, signal=4%
GO_LEUKOCYTE_CHEMOTAXIS	GO_LEUKOCYTE_CHEMOTAXIS		123	0.411557	1.23475	0	0.295942	1	2705	tags=24%, list=13%, signal=28%
GO_RESPONSE_TO_MECHANICAL_STIMULUS	GO_RESPONSE_TO_MECHANICAL_STIMULUS		169	0.345485	1.23452	0	0.296242	1	2727	tags=18%, list=13%, signal=20%
GO_NEGATIVE_REGULATION_OF_TRANSFERASE_ACTIVITY	GO_NEGATIVE_REGULATION_OF_TRANSFERASE_ACTIVITY		234	0.210072	1.23435	0.10119	0.29642	1	4180	tags=14%, list=20%, signal=17%
GO_IONOTROPIC_GLUTAMATE_RECEPTOR_BINDING	GO_IONOTROPIC_GLUTAMATE_RECEPTOR_BINDING		29	0.470655	1.23395	0.2147	0.296769	1	299	tags=10%, list=1%, signal=10%
GO_COLLAGEN_BINDING	GO_COLLAGEN_BINDING		59	0.431492	1.23395	0.0996094	0.296604	1	1325	tags=15%, list=6%, signal=16%
GO_UBIQUITIN_LIGASE_COMPLEX	GO_UBIQUITIN_LIGASE_COMPLEX		265	0.174765	1.23328	0	0.297241	1	5784	tags=20%, list=27%, signal=27%
GO_UROGENITAL_SYSTEM_DEVELOPMENT	GO_UROGENITAL_SYSTEM_DEVELOPMENT		292	0.292929	1.2331	0	0.29783	1	1281	tags=9%, list=6%, signal=9%
GO_REGULATION_OF_PLATELET_ACTIVATION	GO_REGULATION_OF_PLATELET_ACTIVATION		25	0.433579	1.2328	0	0.298332	1	1904	tags=24%, list=9%, signal=26%
GO_FATTY_ACID_METABOLIC_PROCESS	GO_FATTY_ACID_METABOLIC_PROCESS		211	0.347354	1.23254	0	0.298507	1	2567	tags=13%, list=12%, signal=15%
GO_DOPAMINE_TRANSPORT	GO_DOPAMINE_TRANSPORT		36	0.404111	1.23234	0	0.29879	1	2136	tags=31%, list=10%, signal=34%
GO_NEUROTRANSMITTER_REUPTAKE	GO_NEUROTRANSMITTER_REUPTAKE		16	0.549539	1.2322	0.104364	0.29883	1	2198	tags=38%, list=10%, signal=42%
GO_NEGATIVE_REGULATION_OF_TYPE_I_INTERFERON_PRODUCTION	GO_NEGATIVE_REGULATION_OF_TYPE_I_INTERFERON_PRODUCTION		36	0.683519	1.23213	0	0.29877	1	4274	tags=39%, list=20%, signal=49%
GO_MEIOTIC_CHROMOSOME_SEPARATION	GO_MEIOTIC_CHROMOSOME_SEPARATION		20	0.57806	1.23212	0.204239	0.298604	1	2094	tags=15%, list=10%, signal=17%
GO_CYTOSOLIC_CALCIUM_ION_TRANSPORT	GO_CYTOSOLIC_CALCIUM_ION_TRANSPORT		128	0.315104	1.23189	0.0971074	0.298727	1	2787	tags=16%, list=13%, signal=18%
GO_REGULATION_OF_CILIUM_ASSEMBLY	GO_REGULATION_OF_CILIUM_ASSEMBLY		47	0.372399	1.23185	0.286837	0.298601	1	1108	tags=6%, list=5%, signal=7%
GO_POSITIVE_REGULATION_OF_PATHWAY_RESTRICTED_SMAD_PROTEIN_PHOSPHORYLATION	GO_POSITIVE_REGULATION_OF_PATHWAY_RESTRICTED_SMAD_PROTEIN_PHOSPHORYLATION		38	0.480463	1.23158	0.0869565	0.298677	1	3560	tags=32%, list=17%, signal=38%
GO_CELL_CELL_ADHERENS_JUNCTION	GO_CELL_CELL_ADHERENS_JUNCTION		100	0.345152	1.23137	0	0.298889	1	3343	tags=18%, list=16%, signal=21%
GO_REGULATION_OF_RECEPTOR_INTERNALIZATION	GO_REGULATION_OF_RECEPTOR_INTERNALIZATION		46	0.401313	1.2309	0.208661	0.299423	1	1664	tags=15%, list=8%, signal=16%
GO_NEUROTRANSMITTER_RECEPTOR_ACTIVITY	GO_NEUROTRANSMITTER_RECEPTOR_ACTIVITY		67	0.440612	1.23063	0.0934394	0.299474	1	1497	tags=24%, list=7%, signal=26%
GO_CIRCADIAN_REGULATION_OF_GENE_EXPRESSION	GO_CIRCADIAN_REGULATION_OF_GENE_EXPRESSION		50	0.392617	1.23049	0.0947581	0.299664	1	1813	tags=10%, list=8%, signal=11%
GO_REGULATION_OF_LEUKOCYTE_DIFFERENTIATION	GO_REGULATION_OF_LEUKOCYTE_DIFFERENTIATION		195	0.309483	1.23038	0	0.29967	1	2223	tags=14%, list=10%, signal=15%
GO_REGULATION_OF_INTERLEUKIN_4_PRODUCTION	GO_REGULATION_OF_INTERLEUKIN_4_PRODUCTION		20	0.560012	1.23014	0.213115	0.299863	1	2027	tags=35%, list=9%, signal=39%
GO_NITRIC_OXIDE_BIOSYNTHETIC_PROCESS	GO_NITRIC_OXIDE_BIOSYNTHETIC_PROCESS		54	0.431439	1.23003	0	0.299775	1	3790	tags=31%, list=18%, signal=38%
GO_PURINE_CONTAINING_COMPOUND_CATABOLIC_PROCESS	GO_PURINE_CONTAINING_COMPOUND_CATABOLIC_PROCESS		45	0.434263	1.22955	0.0909091	0.300487	1	1521	tags=18%, list=7%, signal=19%
GO_RIBOSOMAL_SUBUNIT	GO_RIBOSOMAL_SUBUNIT		185	0.326617	1.22947	0.0996094	0.300409	1	8764	tags=60%, list=41%, signal=101%
GO_CELLULAR_RESPONSE_TO_PH	GO_CELLULAR_RESPONSE_TO_PH		15	0.538673	1.22937	0.0903226	0.300519	1	2018	tags=27%, list=9%, signal=29%
GO_REGULATION_OF_TRANS_SYNAPTIC_SIGNALING	GO_REGULATION_OF_TRANS_SYNAPTIC_SIGNALING		369	0.313112	1.22911	0	0.300854	1	1666	tags=14%, list=8%, signal=15%
GO_POSITIVE_REGULATION_OF_T_CELL_MEDIATED_IMMUNITY	GO_POSITIVE_REGULATION_OF_T_CELL_MEDIATED_IMMUNITY		34	0.429698	1.22893	0.0846774	0.30118	1	2598	tags=21%, list=12%, signal=23%
GO_NEGATIVE_REGULATION_OF_NUCLEOCYTOPLASMIC_TRANSPORT	GO_NEGATIVE_REGULATION_OF_NUCLEOCYTOPLASMIC_TRANSPORT		19	0.463285	1.22881	0.304015	0.301245	1	5757	tags=37%, list=27%, signal=50%
GO_ACTIN_FILAMENT_ORGANIZATION	GO_ACTIN_FILAMENT_ORGANIZATION		342	0.245777	1.22842	0	0.301959	1	2832	tags=11%, list=13%, signal=13%
GO_REGULATION_OF_CYTOKINE_PRODUCTION_INVOLVED_IN_IMMUNE_RESPONSE	GO_REGULATION_OF_CYTOKINE_PRODUCTION_INVOLVED_IN_IMMUNE_RESPONSE		65	0.55524	1.22836	0	0.301882	1	2778	tags=32%, list=13%, signal=37%
GO_NEGATIVE_REGULATION_OF_CELLULAR_PROTEIN_CATABOLIC_PROCESS	GO_NEGATIVE_REGULATION_OF_CELLULAR_PROTEIN_CATABOLIC_PROCESS		77	0.33752	1.22825	0.268344	0.302005	1	3956	tags=12%, list=19%, signal=14%
GO_CALCIUM_ION_TRANSMEMBRANE_TRANSPORTER_ACTIVITY	GO_CALCIUM_ION_TRANSMEMBRANE_TRANSPORTER_ACTIVITY		112	0.402781	1.22792	0.124498	0.302061	1	2836	tags=24%, list=13%, signal=28%
GO_ORGANELLE_FISSION	GO_ORGANELLE_FISSION		395	0.210993	1.2278	0.104508	0.302024	1	643	tags=3%, list=3%, signal=3%
GO_PRESYNAPSE	GO_PRESYNAPSE		420	0.295643	1.22767	0	0.301928	1	1116	tags=9%, list=5%, signal=10%
GO_ENDOTHELIAL_CELL_PROLIFERATION	GO_ENDOTHELIAL_CELL_PROLIFERATION		113	0.403674	1.22739	0.0947581	0.302246	1	2888	tags=25%, list=14%, signal=29%
GO_RECEPTOR_SIGNALING_COMPLEX_SCAFFOLD_ACTIVITY	GO_RECEPTOR_SIGNALING_COMPLEX_SCAFFOLD_ACTIVITY		21	0.49284	1.2271	0.188	0.302652	1	4771	tags=38%, list=22%, signal=49%
GO_NEGATIVE_REGULATION_OF_ALPHA_BETA_T_CELL_DIFFERENTIATION	GO_NEGATIVE_REGULATION_OF_ALPHA_BETA_T_CELL_DIFFERENTIATION		22	0.57582	1.2269	0.0917969	0.302729	1	4593	tags=55%, list=22%, signal=69%
GO_EXTRINSIC_COMPONENT_OF_PLASMA_MEMBRANE	GO_EXTRINSIC_COMPONENT_OF_PLASMA_MEMBRANE		134	0.350454	1.22684	0	0.302611	1	2606	tags=16%, list=12%, signal=18%
GO_RETINA_VASCULATURE_DEVELOPMENT_IN_CAMERA_TYPE_EYE	GO_RETINA_VASCULATURE_DEVELOPMENT_IN_CAMERA_TYPE_EYE		17	0.6151	1.22675	0	0.302744	1	2552	tags=29%, list=12%, signal=33%
GO_ORGANIC_HYDROXY_COMPOUND_TRANSPORT	GO_ORGANIC_HYDROXY_COMPOUND_TRANSPORT		169	0.399575	1.22641	0	0.302996	1	2321	tags=20%, list=11%, signal=22%
GO_POSITIVE_REGULATION_OF_PHOSPHATASE_ACTIVITY	GO_POSITIVE_REGULATION_OF_PHOSPHATASE_ACTIVITY		24	0.345142	1.22638	0.10978	0.30287	1	2396	tags=8%, list=11%, signal=9%
GO_POSITIVE_REGULATION_OF_RESPONSE_TO_BIOTIC_STIMULUS	GO_POSITIVE_REGULATION_OF_RESPONSE_TO_BIOTIC_STIMULUS		30	0.5661	1.22624	0.115234	0.303012	1	3509	tags=27%, list=16%, signal=32%
GO_AXON_REGENERATION	GO_AXON_REGENERATION		44	0.465915	1.2262	0.198444	0.302916	1	2535	tags=20%, list=12%, signal=23%
GO_POSITIVE_REGULATION_OF_NATURAL_KILLER_CELL_ACTIVATION	GO_POSITIVE_REGULATION_OF_NATURAL_KILLER_CELL_ACTIVATION		17	0.417383	1.22617	0.103774	0.302853	1	1865	tags=24%, list=9%, signal=26%
GO_NEURON_PROJECTION_GUIDANCE	GO_NEURON_PROJECTION_GUIDANCE		255	0.326072	1.22541	0	0.303354	1	2794	tags=17%, list=13%, signal=20%
GO_PROTEIN_COMPLEX_INVOLVED_IN_CELL_ADHESION	GO_PROTEIN_COMPLEX_INVOLVED_IN_CELL_ADHESION		28	0.44865	1.22525	0.0938124	0.303274	1	1122	tags=18%, list=5%, signal=19%
GO_CARTILAGE_DEVELOPMENT	GO_CARTILAGE_DEVELOPMENT		175	0.293688	1.22509	0	0.30346	1	2709	tags=15%, list=13%, signal=18%
GO_EXPORT_ACROSS_PLASMA_MEMBRANE	GO_EXPORT_ACROSS_PLASMA_MEMBRANE		22	0.595365	1.22507	0.108571	0.303352	1	2727	tags=32%, list=13%, signal=36%
GO_POSITIVE_REGULATION_OF_DNA_METABOLIC_PROCESS	GO_POSITIVE_REGULATION_OF_DNA_METABOLIC_PROCESS		142	0.243446	1.22498	0.10166	0.303366	1	1571	tags=4%, list=7%, signal=4%
GO_MITOCHONDRIAL_FISSION	GO_MITOCHONDRIAL_FISSION		31	0.357173	1.22471	0.195519	0.303677	1	623	tags=6%, list=3%, signal=7%
GO_TRANSFORMING_GROWTH_FACTOR_BETA_RECEPTOR_BINDING	GO_TRANSFORMING_GROWTH_FACTOR_BETA_RECEPTOR_BINDING		40	0.464321	1.22462	0.0873016	0.30359	1	3560	tags=30%, list=17%, signal=36%
GO_LIVER_MORPHOGENESIS	GO_LIVER_MORPHOGENESIS		15	0.554507	1.22447	0.1875	0.303586	1	5472	tags=60%, list=26%, signal=81%
GO_NONRIBOSOMAL_PEPTIDE_BIOSYNTHETIC_PROCESS	GO_NONRIBOSOMAL_PEPTIDE_BIOSYNTHETIC_PROCESS		17	0.461279	1.22441	0	0.303455	1	4005	tags=29%, list=19%, signal=36%
GO_REGULATION_OF_BLOOD_CIRCULATION	GO_REGULATION_OF_BLOOD_CIRCULATION		225	0.355774	1.22424	0.104762	0.303591	1	2795	tags=24%, list=13%, signal=27%
GO_REGULATION_OF_ALCOHOL_BIOSYNTHETIC_PROCESS	GO_REGULATION_OF_ALCOHOL_BIOSYNTHETIC_PROCESS		63	0.340263	1.22414	0.216634	0.303566	1	1305	tags=8%, list=6%, signal=8%
GO_RNA_3_END_PROCESSING	GO_RNA_3_END_PROCESSING		133	0.238665	1.22408	0.265655	0.303477	1	7304	tags=31%, list=34%, signal=47%
GO_DNA_DAMAGE_RESPONSE_SIGNAL_TRANSDUCTION_RESULTING_IN_TRANSCRIPTION	GO_DNA_DAMAGE_RESPONSE_SIGNAL_TRANSDUCTION_RESULTING_IN_TRANSCRIPTION		16	0.52873	1.22395	0.0758755	0.303421	1	5935	tags=56%, list=28%, signal=78%
GO_POSITIVE_REGULATION_OF_CD4_POSITIVE_ALPHA_BETA_T_CELL_ACTIVATION	GO_POSITIVE_REGULATION_OF_CD4_POSITIVE_ALPHA_BETA_T_CELL_ACTIVATION		22	0.469607	1.22386	0	0.303462	1	2223	tags=27%, list=10%, signal=30%
GO_DEACETYLASE_ACTIVITY	GO_DEACETYLASE_ACTIVITY		41	0.353326	1.22379	0.171206	0.303412	1	3476	tags=12%, list=16%, signal=15%
GO_POSITIVE_REGULATION_OF_T_CELL_MIGRATION	GO_POSITIVE_REGULATION_OF_T_CELL_MIGRATION		18	0.703324	1.22376	0.0761719	0.303324	1	2653	tags=39%, list=12%, signal=44%
GO_POSITIVE_REGULATION_OF_GENE_EXPRESSION_EPIGENETIC	GO_POSITIVE_REGULATION_OF_GENE_EXPRESSION_EPIGENETIC		54	0.258725	1.22348	0.0895238	0.303572	1	8695	tags=48%, list=41%, signal=81%
GO_GLYCEROLIPID_METABOLIC_PROCESS	GO_GLYCEROLIPID_METABOLIC_PROCESS		188	0.265048	1.22345	0	0.303408	1	4183	tags=15%, list=20%, signal=19%
GO_CARBOHYDRATE_BINDING	GO_CARBOHYDRATE_BINDING		171	0.358226	1.22307	0	0.303948	1	1733	tags=14%, list=8%, signal=15%
GO_REGULATION_OF_LIPID_STORAGE	GO_REGULATION_OF_LIPID_STORAGE		36	0.466914	1.22293	0.113095	0.303978	1	2712	tags=17%, list=13%, signal=19%
GO_PHOSPHOLIPASE_C_ACTIVITY	GO_PHOSPHOLIPASE_C_ACTIVITY		22	0.557068	1.22273	0.214425	0.304115	1	3693	tags=36%, list=17%, signal=44%
GO_EPIDERMIS_DEVELOPMENT	GO_EPIDERMIS_DEVELOPMENT		239	0.290714	1.22254	0	0.304112	1	3606	tags=17%, list=17%, signal=20%
GO_LEUKOCYTE_ADHESION_TO_VASCULAR_ENDOTHELIAL_CELL	GO_LEUKOCYTE_ADHESION_TO_VASCULAR_ENDOTHELIAL_CELL		23	0.598597	1.22252	0.107422	0.303979	1	3247	tags=39%, list=15%, signal=46%
GO_PROTEIN_LIPID_COMPLEX_SUBUNIT_ORGANIZATION	GO_PROTEIN_LIPID_COMPLEX_SUBUNIT_ORGANIZATION		32	0.490084	1.22239	0	0.303849	1	1641	tags=19%, list=8%, signal=20%
GO_NEGATIVE_REGULATION_OF_CD4_POSITIVE_ALPHA_BETA_T_CELL_DIFFERENTIATION	GO_NEGATIVE_REGULATION_OF_CD4_POSITIVE_ALPHA_BETA_T_CELL_DIFFERENTIATION		19	0.633796	1.22212	0.107422	0.304375	1	4593	tags=58%, list=22%, signal=74%
GO_MEMBRANE_REPOLARIZATION	GO_MEMBRANE_REPOLARIZATION		38	0.452504	1.22211	0.105163	0.304211	1	1226	tags=18%, list=6%, signal=20%
GO_RECEPTOR_COMPLEX	GO_RECEPTOR_COMPLEX		315	0.344689	1.22186	0	0.304519	1	2992	tags=23%, list=14%, signal=27%
GO_DIENCEPHALON_DEVELOPMENT	GO_DIENCEPHALON_DEVELOPMENT		65	0.363197	1.22182	0	0.304489	1	1164	tags=14%, list=5%, signal=15%
GO_ZYMOGEN_ACTIVATION	GO_ZYMOGEN_ACTIVATION		36	0.395677	1.22166	0.115234	0.304791	1	2890	tags=19%, list=14%, signal=22%
GO_INOSITOL_PHOSPHATE_BIOSYNTHETIC_PROCESS	GO_INOSITOL_PHOSPHATE_BIOSYNTHETIC_PROCESS		35	0.430007	1.2216	0.104364	0.304707	1	2622	tags=20%, list=12%, signal=23%
GO_CELLULAR_RESPONSE_TO_VIRUS	GO_CELLULAR_RESPONSE_TO_VIRUS		41	0.554232	1.22152	0.11753	0.304544	1	3024	tags=22%, list=14%, signal=26%
GO_POSITIVE_REGULATION_OF_HEART_CONTRACTION	GO_POSITIVE_REGULATION_OF_HEART_CONTRACTION		30	0.443734	1.22145	0	0.304486	1	1933	tags=23%, list=9%, signal=26%
GO_POSITIVE_REGULATION_OF_BLOOD_CIRCULATION	GO_POSITIVE_REGULATION_OF_BLOOD_CIRCULATION		50	0.466364	1.22143	0.111328	0.304455	1	2140	tags=28%, list=10%, signal=31%
GO_MULTICELLULAR_ORGANISMAL_HOMEOSTASIS	GO_MULTICELLULAR_ORGANISMAL_HOMEOSTASIS		359	0.293935	1.22124	0	0.304626	1	1980	tags=11%, list=9%, signal=12%
GO_REGULATION_OF_CELL_DIVISION	GO_REGULATION_OF_CELL_DIVISION		136	0.262558	1.22111	0	0.304764	1	1733	tags=7%, list=8%, signal=7%
GO_TYPE_I_INTERFERON_PRODUCTION	GO_TYPE_I_INTERFERON_PRODUCTION		105	0.341004	1.22079	0	0.305128	1	1617	tags=10%, list=8%, signal=10%
GO_CELLULAR_RESPONSE_TO_PROSTAGLANDIN_STIMULUS	GO_CELLULAR_RESPONSE_TO_PROSTAGLANDIN_STIMULUS		19	0.73764	1.22057	0	0.305513	1	2414	tags=42%, list=11%, signal=47%
GO_DENDRITE_MEMBRANE	GO_DENDRITE_MEMBRANE		32	0.391171	1.22051	0.104255	0.30547	1	1102	tags=19%, list=5%, signal=20%
GO_INTERMEDIATE_FILAMENT_BASED_PROCESS	GO_INTERMEDIATE_FILAMENT_BASED_PROCESS		36	0.476746	1.22016	0.327835	0.305761	1	2333	tags=17%, list=11%, signal=19%
GO_RESPONSE_TO_INTERLEUKIN_6	GO_RESPONSE_TO_INTERLEUKIN_6		31	0.483671	1.22012	0.194444	0.305637	1	2396	tags=23%, list=11%, signal=25%
GO_NEGATIVE_REGULATION_OF_IMMUNE_SYSTEM_PROCESS	GO_NEGATIVE_REGULATION_OF_IMMUNE_SYSTEM_PROCESS		322	0.345041	1.21989	0	0.305662	1	2465	tags=15%, list=12%, signal=17%
GO_CELL_CHEMOTAXIS	GO_CELL_CHEMOTAXIS		176	0.363003	1.21981	0.0850202	0.305653	1	2753	tags=21%, list=13%, signal=24%
GO_NEGATIVE_REGULATION_OF_PHAGOCYTOSIS	GO_NEGATIVE_REGULATION_OF_PHAGOCYTOSIS		15	0.549262	1.21976	0.324219	0.305491	1	1967	tags=20%, list=9%, signal=22%
GO_REGULATION_OF_GLUCOSE_METABOLIC_PROCESS	GO_REGULATION_OF_GLUCOSE_METABOLIC_PROCESS		64	0.348847	1.2197	0.298507	0.305328	1	3541	tags=19%, list=17%, signal=22%
GO_REGULATION_OF_UBIQUITIN_DEPENDENT_PROTEIN_CATABOLIC_PROCESS	GO_REGULATION_OF_UBIQUITIN_DEPENDENT_PROTEIN_CATABOLIC_PROCESS		137	0.237739	1.21937	0.225207	0.305629	1	142	tags=1%, list=1%, signal=1%
GO_REGULATION_OF_POTASSIUM_ION_TRANSPORT	GO_REGULATION_OF_POTASSIUM_ION_TRANSPORT		75	0.424422	1.21908	0.105163	0.305937	1	2477	tags=24%, list=12%, signal=27%
GO_NEURON_PROJECTION_MEMBRANE	GO_NEURON_PROJECTION_MEMBRANE		50	0.409575	1.21837	0	0.306976	1	1102	tags=18%, list=5%, signal=19%
GO_REGULATION_OF_MEMBRANE_PROTEIN_ECTODOMAIN_PROTEOLYSIS	GO_REGULATION_OF_MEMBRANE_PROTEIN_ECTODOMAIN_PROTEOLYSIS		19	0.548799	1.21817	0.173333	0.307166	1	2059	tags=16%, list=10%, signal=17%
GO_CATALYTIC_ACTIVITY_ACTING_ON_A_RRNA	GO_CATALYTIC_ACTIVITY_ACTING_ON_A_RRNA		21	0.374823	1.21774	0.199597	0.307535	1	1600	tags=10%, list=7%, signal=10%
GO_CELL_BODY	GO_CELL_BODY		476	0.297652	1.21732	0	0.308008	1	1961	tags=12%, list=9%, signal=13%
GO_FLAVIN_ADENINE_DINUCLEOTIDE_BINDING	GO_FLAVIN_ADENINE_DINUCLEOTIDE_BINDING		69	0.34308	1.21709	0.100427	0.308125	1	1192	tags=9%, list=6%, signal=9%
GO_CARDIAC_CONDUCTION	GO_CARDIAC_CONDUCTION		117	0.349974	1.21707	0	0.307962	1	1249	tags=15%, list=6%, signal=15%
GO_POSITIVE_REGULATION_OF_ANIMAL_ORGAN_MORPHOGENESIS	GO_POSITIVE_REGULATION_OF_ANIMAL_ORGAN_MORPHOGENESIS		74	0.366053	1.21699	0.0846154	0.307952	1	1168	tags=12%, list=5%, signal=13%
GO_ATPASE_ACTIVITY_COUPLED_TO_MOVEMENT_OF_SUBSTANCES	GO_ATPASE_ACTIVITY_COUPLED_TO_MOVEMENT_OF_SUBSTANCES		98	0.374902	1.21662	0.221344	0.308572	1	2449	tags=15%, list=11%, signal=17%
GO_REGULATION_OF_T_CELL_MEDIATED_IMMUNITY	GO_REGULATION_OF_T_CELL_MEDIATED_IMMUNITY		46	0.434046	1.21657	0.26494	0.308447	1	2598	tags=22%, list=12%, signal=25%
GO_REGULATION_OF_NEUROTRANSMITTER_LEVELS	GO_REGULATION_OF_NEUROTRANSMITTER_LEVELS		270	0.314751	1.21654	0	0.308321	1	2198	tags=15%, list=10%, signal=17%
GO_MITOCHONDRIAL_FUSION	GO_MITOCHONDRIAL_FUSION		21	0.338179	1.21621	0	0.308585	1	7793	tags=52%, list=37%, signal=82%
GO_REGULATION_OF_SMALL_GTPASE_MEDIATED_SIGNAL_TRANSDUCTION	GO_REGULATION_OF_SMALL_GTPASE_MEDIATED_SIGNAL_TRANSDUCTION		301	0.27104	1.21601	0.0865979	0.308782	1	3120	tags=14%, list=15%, signal=16%
GO_RESPONSE_TO_STEROL	GO_RESPONSE_TO_STEROL		24	0.478389	1.21587	0.102823	0.309082	1	1572	tags=13%, list=7%, signal=13%
GO_REGULATION_OF_DEFENSE_RESPONSE_TO_VIRUS	GO_REGULATION_OF_DEFENSE_RESPONSE_TO_VIRUS		55	0.389712	1.21586	0.203036	0.308919	1	4286	tags=18%, list=20%, signal=23%
GO_REGULATION_OF_EPIDERMAL_GROWTH_FACTOR_ACTIVATED_RECEPTOR_ACTIVITY	GO_REGULATION_OF_EPIDERMAL_GROWTH_FACTOR_ACTIVATED_RECEPTOR_ACTIVITY		23	0.408793	1.21573	0.214425	0.308976	1	2699	tags=17%, list=13%, signal=20%
GO_SPHINGOLIPID_METABOLIC_PROCESS	GO_SPHINGOLIPID_METABOLIC_PROCESS		68	0.307143	1.21542	0.215726	0.309246	1	556	tags=3%, list=3%, signal=3%
GO_T_CELL_MEDIATED_CYTOTOXICITY	GO_T_CELL_MEDIATED_CYTOTOXICITY		32	0.43559	1.21507	0.117647	0.309616	1	1865	tags=13%, list=9%, signal=14%
GO_POSITIVE_REGULATION_OF_JUN_KINASE_ACTIVITY	GO_POSITIVE_REGULATION_OF_JUN_KINASE_ACTIVITY		64	0.284511	1.21476	0	0.309837	1	2653	tags=11%, list=12%, signal=12%
GO_CYTOKINE_RECEPTOR_BINDING	GO_CYTOKINE_RECEPTOR_BINDING		154	0.365015	1.21427	0.0833333	0.310556	1	2705	tags=19%, list=13%, signal=22%
GO_PROTEIN_LOCALIZATION_TO_CELL_SURFACE	GO_PROTEIN_LOCALIZATION_TO_CELL_SURFACE		53	0.290706	1.21414	0.187629	0.31059	1	1842	tags=9%, list=9%, signal=10%
GO_NEGATIVE_REGULATION_OF_T_HELPER_CELL_DIFFERENTIATION	GO_NEGATIVE_REGULATION_OF_T_HELPER_CELL_DIFFERENTIATION		15	0.64934	1.21414	0.107422	0.310427	1	4593	tags=60%, list=22%, signal=76%
GO_LARGE_RIBOSOMAL_SUBUNIT	GO_LARGE_RIBOSOMAL_SUBUNIT		117	0.303271	1.21404	0.0996094	0.310353	1	8574	tags=53%, list=40%, signal=88%
GO_ANATOMICAL_STRUCTURE_HOMEOSTASIS	GO_ANATOMICAL_STRUCTURE_HOMEOSTASIS		350	0.274995	1.21369	0.209709	0.310707	1	1455	tags=5%, list=7%, signal=6%
GO_GASTRULATION	GO_GASTRULATION		153	0.3143	1.21366	0.0874752	0.310577	1	1815	tags=10%, list=9%, signal=11%
GO_NEGATIVE_REGULATION_OF_CYTOSKELETON_ORGANIZATION	GO_NEGATIVE_REGULATION_OF_CYTOSKELETON_ORGANIZATION		125	0.346814	1.21362	0	0.310488	1	2157	tags=11%, list=10%, signal=12%
GO_CELLULAR_RESPONSE_TO_LOW_DENSITY_LIPOPROTEIN_PARTICLE_STIMULUS	GO_CELLULAR_RESPONSE_TO_LOW_DENSITY_LIPOPROTEIN_PARTICLE_STIMULUS		16	0.521931	1.2134	0	0.310816	1	1133	tags=19%, list=5%, signal=20%
GO_L_GLUTAMATE_TRANSMEMBRANE_TRANSPORT	GO_L_GLUTAMATE_TRANSMEMBRANE_TRANSPORT		18	0.511064	1.21335	0.103586	0.310689	1	2198	tags=28%, list=10%, signal=31%
GO_VESICLE_MEDIATED_TRANSPORT_TO_THE_PLASMA_MEMBRANE	GO_VESICLE_MEDIATED_TRANSPORT_TO_THE_PLASMA_MEMBRANE		86	0.320773	1.21316	0.283401	0.310832	1	3464	tags=10%, list=16%, signal=12%
GO_REGULATION_OF_TYPE_2_IMMUNE_RESPONSE	GO_REGULATION_OF_TYPE_2_IMMUNE_RESPONSE		21	0.578531	1.21267	0	0.311356	1	4033	tags=57%, list=19%, signal=70%
GO_POSITIVE_REGULATION_OF_OSTEOBLAST_DIFFERENTIATION	GO_POSITIVE_REGULATION_OF_OSTEOBLAST_DIFFERENTIATION		52	0.380919	1.21232	0.183505	0.311655	1	1782	tags=12%, list=8%, signal=13%
GO_ACTIN_BASED_CELL_PROJECTION	GO_ACTIN_BASED_CELL_PROJECTION		172	0.316375	1.21228	0	0.311563	1	1919	tags=12%, list=9%, signal=13%
GO_MONOVALENT_INORGANIC_CATION_TRANSMEMBRANE_TRANSPORTER_ACTIVITY	GO_MONOVALENT_INORGANIC_CATION_TRANSMEMBRANE_TRANSPORTER_ACTIVITY		266	0.360869	1.21204	0	0.311735	1	2787	tags=22%, list=13%, signal=25%
GO_SYNAPTIC_MEMBRANE	GO_SYNAPTIC_MEMBRANE		365	0.306335	1.21192	0	0.311702	1	1481	tags=13%, list=7%, signal=14%
GO_POSITIVE_REGULATION_OF_STEM_CELL_PROLIFERATION	GO_POSITIVE_REGULATION_OF_STEM_CELL_PROLIFERATION		34	0.401697	1.21186	0.0914894	0.311652	1	278	tags=6%, list=1%, signal=6%
GO_RESPONSE_TO_PROSTAGLANDIN_E	GO_RESPONSE_TO_PROSTAGLANDIN_E		16	0.760166	1.2117	0	0.311939	1	1209	tags=31%, list=6%, signal=33%
GO_SNARE_COMPLEX	GO_SNARE_COMPLEX		45	0.322129	1.2116	0.273834	0.311912	1	318	tags=4%, list=1%, signal=5%
GO_RESPONSE_TO_PROSTAGLANDIN	GO_RESPONSE_TO_PROSTAGLANDIN		23	0.688137	1.21154	0.115234	0.311955	1	2686	tags=39%, list=13%, signal=45%
GO_CALMODULIN_BINDING	GO_CALMODULIN_BINDING		174	0.346709	1.21073	0.105372	0.313021	1	2392	tags=17%, list=11%, signal=19%
GO_GLYCEROPHOSPHOLIPID_METABOLIC_PROCESS	GO_GLYCEROPHOSPHOLIPID_METABOLIC_PROCESS		142	0.24144	1.21055	0.0860656	0.31311	1	3975	tags=15%, list=19%, signal=18%
GO_ACTIVATION_OF_INNATE_IMMUNE_RESPONSE	GO_ACTIVATION_OF_INNATE_IMMUNE_RESPONSE		236	0.367158	1.21031	0	0.313249	1	2904	tags=15%, list=14%, signal=17%
GO_NEGATIVE_REGULATION_OF_TRANSMEMBRANE_RECEPTOR_PROTEIN_SERINE_THREONINE_KINASE_SIGNALING_PATHWAY	GO_NEGATIVE_REGULATION_OF_TRANSMEMBRANE_RECEPTOR_PROTEIN_SERINE_THREONINE_KINASE_SIGNALING_PATHWAY		93	0.314455	1.21008	0	0.313464	1	3790	tags=19%, list=18%, signal=23%
GO_PROTEASOMAL_UBIQUITIN_INDEPENDENT_PROTEIN_CATABOLIC_PROCESS	GO_PROTEASOMAL_UBIQUITIN_INDEPENDENT_PROTEIN_CATABOLIC_PROCESS		21	0.522731	1.2098	0.22332	0.313638	1	8902	tags=67%, list=42%, signal=114%
GO_NUCLEOTIDE_DIPHOSPHATASE_ACTIVITY	GO_NUCLEOTIDE_DIPHOSPHATASE_ACTIVITY		17	0.502236	1.20948	0.173152	0.314049	1	2030	tags=18%, list=10%, signal=19%
GO_G_PROTEIN_COUPLED_RECEPTOR_SIGNALING_PATHWAY_COUPLED_TO_CYCLIC_NUCLEOTIDE_SECOND_MESSENGER	GO_G_PROTEIN_COUPLED_RECEPTOR_SIGNALING_PATHWAY_COUPLED_TO_CYCLIC_NUCLEOTIDE_SECOND_MESSENGER		151	0.430187	1.20945	0	0.313919	1	2795	tags=29%, list=13%, signal=33%
GO_PROTEIN_O_LINKED_GLYCOSYLATION	GO_PROTEIN_O_LINKED_GLYCOSYLATION		84	0.425941	1.20917	0.121094	0.314046	1	4365	tags=29%, list=20%, signal=36%
GO_REGULATION_OF_NUCLEOTIDE_BIOSYNTHETIC_PROCESS	GO_REGULATION_OF_NUCLEOTIDE_BIOSYNTHETIC_PROCESS		28	0.351191	1.2091	0	0.313937	1	1639	tags=11%, list=8%, signal=12%
GO_BASAL_PLASMA_MEMBRANE	GO_BASAL_PLASMA_MEMBRANE		26	0.558759	1.20868	0.102823	0.3145	1	2966	tags=27%, list=14%, signal=31%
GO_POSITIVE_REGULATION_OF_PROTEIN_DEPHOSPHORYLATION	GO_POSITIVE_REGULATION_OF_PROTEIN_DEPHOSPHORYLATION		36	0.262277	1.20825	0.189516	0.314999	1	4215	tags=17%, list=20%, signal=21%
GO_NON_CANONICAL_WNT_SIGNALING_PATHWAY	GO_NON_CANONICAL_WNT_SIGNALING_PATHWAY		141	0.254562	1.20808	0	0.315066	1	4753	tags=18%, list=22%, signal=23%
GO_REGULATION_OF_NUCLEOCYTOPLASMIC_TRANSPORT	GO_REGULATION_OF_NUCLEOCYTOPLASMIC_TRANSPORT		98	0.300646	1.20805	0.199597	0.31494	1	2991	tags=8%, list=14%, signal=9%
GO_CRANIOFACIAL_SUTURE_MORPHOGENESIS	GO_CRANIOFACIAL_SUTURE_MORPHOGENESIS		15	0.513279	1.20795	0.10119	0.314814	1	1589	tags=13%, list=7%, signal=14%
GO_POSITIVE_REGULATION_OF_RESPONSE_TO_ENDOPLASMIC_RETICULUM_STRESS	GO_POSITIVE_REGULATION_OF_RESPONSE_TO_ENDOPLASMIC_RETICULUM_STRESS		34	0.340634	1.20795	0.0917969	0.314651	1	5428	tags=24%, list=25%, signal=32%
GO_REGULATION_OF_RESPONSE_TO_DRUG	GO_REGULATION_OF_RESPONSE_TO_DRUG		70	0.382457	1.20791	0.214149	0.314518	1	2198	tags=24%, list=10%, signal=27%
GO_POSITIVE_REGULATION_OF_INTERLEUKIN_6_SECRETION	GO_POSITIVE_REGULATION_OF_INTERLEUKIN_6_SECRETION		16	0.579938	1.20785	0.322957	0.314514	1	4290	tags=38%, list=20%, signal=47%
GO_METALLOEXOPEPTIDASE_ACTIVITY	GO_METALLOEXOPEPTIDASE_ACTIVITY		46	0.413048	1.20782	0.111954	0.314409	1	950	tags=13%, list=4%, signal=14%
GO_OXIDOREDUCTASE_ACTIVITY_ACTING_ON_PAIRED_DONORS_WITH_INCORPORATION_OR_REDUCTION_OF_MOLECULAR_OXYGEN	GO_OXIDOREDUCTASE_ACTIVITY_ACTING_ON_PAIRED_DONORS_WITH_INCORPORATION_OR_REDUCTION_OF_MOLECULAR_OXYGEN		115	0.370695	1.20758	0	0.314524	1	1830	tags=13%, list=9%, signal=14%
GO_NEGATIVE_REGULATION_OF_RESPONSE_TO_CYTOKINE_STIMULUS	GO_NEGATIVE_REGULATION_OF_RESPONSE_TO_CYTOKINE_STIMULUS		41	0.434363	1.20725	0.214425	0.314696	1	3897	tags=22%, list=18%, signal=27%
GO_G_PROTEIN_COUPLED_RECEPTOR_BINDING	GO_G_PROTEIN_COUPLED_RECEPTOR_BINDING		175	0.341331	1.20711	0	0.314831	1	2795	tags=18%, list=13%, signal=20%
GO_PARAXIAL_MESODERM_DEVELOPMENT	GO_PARAXIAL_MESODERM_DEVELOPMENT		17	0.438497	1.20691	0.202	0.314998	1	5623	tags=41%, list=26%, signal=56%
GO_NEGATIVE_REGULATION_OF_PROTEIN_MODIFICATION_BY_SMALL_PROTEIN_CONJUGATION_OR_REMOVAL	GO_NEGATIVE_REGULATION_OF_PROTEIN_MODIFICATION_BY_SMALL_PROTEIN_CONJUGATION_OR_REMOVAL		73	0.519666	1.20673	0	0.315142	1	4660	tags=29%, list=22%, signal=37%
GO_NUCLEAR_TRANSPORT	GO_NUCLEAR_TRANSPORT		315	0.193906	1.20644	0.196116	0.315259	1	6581	tags=21%, list=31%, signal=30%
GO_MEMBRANE_REPOLARIZATION_DURING_ACTION_POTENTIAL	GO_MEMBRANE_REPOLARIZATION_DURING_ACTION_POTENTIAL		23	0.480664	1.20644	0.104364	0.315097	1	1226	tags=17%, list=6%, signal=18%
GO_POSITIVE_REGULATION_OF_LEUKOCYTE_MEDIATED_IMMUNITY	GO_POSITIVE_REGULATION_OF_LEUKOCYTE_MEDIATED_IMMUNITY		90	0.384554	1.20641	0.173828	0.314988	1	3572	tags=21%, list=17%, signal=25%
GO_NEGATIVE_REGULATION_OF_POTASSIUM_ION_TRANSMEMBRANE_TRANSPORT	GO_NEGATIVE_REGULATION_OF_POTASSIUM_ION_TRANSMEMBRANE_TRANSPORT		15	0.538147	1.20584	0.217899	0.315867	1	5110	tags=47%, list=24%, signal=61%
GO_PROTEIN_CONTAINING_COMPLEX_SCAFFOLD_ACTIVITY	GO_PROTEIN_CONTAINING_COMPLEX_SCAFFOLD_ACTIVITY		70	0.307575	1.20583	0.188	0.315704	1	4771	tags=20%, list=22%, signal=26%
GO_MONOCARBOXYLIC_ACID_TRANSPORT	GO_MONOCARBOXYLIC_ACID_TRANSPORT		111	0.323211	1.20553	0	0.315945	1	2241	tags=14%, list=11%, signal=16%
GO_RETINOIC_ACID_RECEPTOR_BINDING	GO_RETINOIC_ACID_RECEPTOR_BINDING		23	0.4808	1.20515	0.310547	0.316489	1	3426	tags=22%, list=16%, signal=26%
GO_PHOSPHORIC_ESTER_HYDROLASE_ACTIVITY	GO_PHOSPHORIC_ESTER_HYDROLASE_ACTIVITY		315	0.303073	1.205	0	0.316457	1	3427	tags=17%, list=16%, signal=20%
GO_ENDOPLASMIC_RETICULUM_UNFOLDED_PROTEIN_RESPONSE	GO_ENDOPLASMIC_RETICULUM_UNFOLDED_PROTEIN_RESPONSE		109	0.241894	1.20493	0.200397	0.316381	1	5700	tags=19%, list=27%, signal=26%
GO_REGULATION_OF_RECEPTOR_MEDIATED_ENDOCYTOSIS	GO_REGULATION_OF_RECEPTOR_MEDIATED_ENDOCYTOSIS		82	0.360576	1.20489	0.334646	0.316272	1	2966	tags=17%, list=14%, signal=20%
GO_TAXIS	GO_TAXIS		477	0.309632	1.20473	0.0878661	0.316302	1	2794	tags=18%, list=13%, signal=20%
GO_ENDOCYTOSIS	GO_ENDOCYTOSIS		456	0.277167	1.20458	0	0.316361	1	1664	tags=9%, list=8%, signal=10%
GO_ESTABLISHMENT_OF_PROTEIN_LOCALIZATION_TO_MITOCHONDRIAL_MEMBRANE	GO_ESTABLISHMENT_OF_PROTEIN_LOCALIZATION_TO_MITOCHONDRIAL_MEMBRANE		18	0.325157	1.20434	0.184158	0.316483	1	14406	tags=100%, list=68%, signal=307%
GO_INTERLEUKIN_4_PRODUCTION	GO_INTERLEUKIN_4_PRODUCTION		25	0.529073	1.20419	0.218029	0.316496	1	2430	tags=32%, list=11%, signal=36%
GO_ORGANISM_EMERGENCE_FROM_PROTECTIVE_STRUCTURE	GO_ORGANISM_EMERGENCE_FROM_PROTECTIVE_STRUCTURE		25	0.464667	1.20418	0.212766	0.316334	1	837	tags=12%, list=4%, signal=12%
GO_NEGATIVE_REGULATION_OF_SUPRAMOLECULAR_FIBER_ORGANIZATION	GO_NEGATIVE_REGULATION_OF_SUPRAMOLECULAR_FIBER_ORGANIZATION		115	0.359426	1.20399	0	0.316608	1	2157	tags=12%, list=10%, signal=13%
GO_NEGATIVE_REGULATION_OF_FIBROBLAST_GROWTH_FACTOR_RECEPTOR_SIGNALING_PATHWAY	GO_NEGATIVE_REGULATION_OF_FIBROBLAST_GROWTH_FACTOR_RECEPTOR_SIGNALING_PATHWAY		15	0.460556	1.20357	0.124	0.317502	1	1664	tags=20%, list=8%, signal=22%
GO_SEMAPHORIN_PLEXIN_SIGNALING_PATHWAY	GO_SEMAPHORIN_PLEXIN_SIGNALING_PATHWAY		40	0.342413	1.20355	0.0971429	0.317419	1	2983	tags=23%, list=14%, signal=26%
GO_EPHRIN_RECEPTOR_ACTIVITY	GO_EPHRIN_RECEPTOR_ACTIVITY		18	0.524429	1.20332	0.0820312	0.317664	1	3133	tags=50%, list=15%, signal=59%
GO_REGULATION_OF_NEUROTRANSMITTER_TRANSPORT	GO_REGULATION_OF_NEUROTRANSMITTER_TRANSPORT		121	0.337462	1.20269	0.10559	0.318519	1	2198	tags=19%, list=10%, signal=21%
GO_INACTIVATION_OF_MAPK_ACTIVITY	GO_INACTIVATION_OF_MAPK_ACTIVITY		24	0.454431	1.2023	0.33463	0.319054	1	5166	tags=38%, list=24%, signal=49%
GO_RESPIRATORY_SYSTEM_PROCESS	GO_RESPIRATORY_SYSTEM_PROCESS		25	0.389006	1.20218	0	0.319005	1	2198	tags=16%, list=10%, signal=18%
GO_POLYSACCHARIDE_BIOSYNTHETIC_PROCESS	GO_POLYSACCHARIDE_BIOSYNTHETIC_PROCESS		66	0.342909	1.20203	0.194059	0.31901	1	1813	tags=9%, list=8%, signal=10%
GO_ENDOCRINE_SYSTEM_DEVELOPMENT	GO_ENDOCRINE_SYSTEM_DEVELOPMENT		109	0.330096	1.20192	0	0.319075	1	1381	tags=11%, list=6%, signal=12%
GO_COFACTOR_TRANSMEMBRANE_TRANSPORTER_ACTIVITY	GO_COFACTOR_TRANSMEMBRANE_TRANSPORTER_ACTIVITY		20	0.347118	1.2016	0.195519	0.319287	1	1870	tags=10%, list=9%, signal=11%
GO_CELLULAR_AMINO_ACID_CATABOLIC_PROCESS	GO_CELLULAR_AMINO_ACID_CATABOLIC_PROCESS		71	0.3849	1.20156	0	0.319165	1	2656	tags=17%, list=12%, signal=19%
GO_SIGNAL_RELEASE	GO_SIGNAL_RELEASE		380	0.296456	1.20143	0	0.319112	1	2136	tags=13%, list=10%, signal=14%
GO_IRON_ION_BINDING	GO_IRON_ION_BINDING		105	0.34571	1.2014	0	0.318986	1	1830	tags=11%, list=9%, signal=12%
GO_P_BODY	GO_P_BODY		80	0.262214	1.20139	0.315068	0.318904	1	35	tags=1%, list=0%, signal=1%
GO_SPHINGOLIPID_BIOSYNTHETIC_PROCESS	GO_SPHINGOLIPID_BIOSYNTHETIC_PROCESS		91	0.317862	1.20077	0.191321	0.319988	1	1011	tags=7%, list=5%, signal=7%
GO_INTERLEUKIN_6_PRODUCTION	GO_INTERLEUKIN_6_PRODUCTION		90	0.366885	1.20074	0.106589	0.319869	1	1218	tags=17%, list=6%, signal=18%
GO_MULTICELLULAR_ORGANISMAL_RESPONSE_TO_STRESS	GO_MULTICELLULAR_ORGANISMAL_RESPONSE_TO_STRESS		57	0.381781	1.20071	0.214425	0.319742	1	1974	tags=19%, list=9%, signal=21%
GO_CD4_POSITIVE_ALPHA_BETA_T_CELL_ACTIVATION	GO_CD4_POSITIVE_ALPHA_BETA_T_CELL_ACTIVATION		64	0.453171	1.20069	0	0.319652	1	2778	tags=30%, list=13%, signal=34%
GO_ADRENERGIC_RECEPTOR_BINDING	GO_ADRENERGIC_RECEPTOR_BINDING		19	0.585554	1.20024	0	0.320336	1	4427	tags=32%, list=21%, signal=40%
GO_RESPONSE_TO_VIRUS	GO_RESPONSE_TO_VIRUS		237	0.307532	1.20002	0.103586	0.320682	1	3024	tags=13%, list=14%, signal=15%
GO_REGULATION_OF_INNATE_IMMUNE_RESPONSE	GO_REGULATION_OF_INNATE_IMMUNE_RESPONSE		317	0.340313	1.19986	0	0.320803	1	2904	tags=15%, list=14%, signal=17%
GO_MEMBRANE_INVAGINATION	GO_MEMBRANE_INVAGINATION		57	0.410124	1.19974	0.107004	0.320852	1	1603	tags=16%, list=8%, signal=17%
GO_ANION_TRANSPORT	GO_ANION_TRANSPORT		455	0.282864	1.19972	0	0.32069	1	2241	tags=13%, list=11%, signal=14%
GO_POSITIVE_REGULATION_OF_NEUROLOGICAL_SYSTEM_PROCESS	GO_POSITIVE_REGULATION_OF_NEUROLOGICAL_SYSTEM_PROCESS		50	0.410884	1.19945	0	0.320924	1	1296	tags=20%, list=6%, signal=21%
GO_NEGATIVE_REGULATION_OF_CYTOKINE_PRODUCTION_INVOLVED_IN_IMMUNE_RESPONSE	GO_NEGATIVE_REGULATION_OF_CYTOKINE_PRODUCTION_INVOLVED_IN_IMMUNE_RESPONSE		16	0.61862	1.19937	0.300781	0.320902	1	2778	tags=38%, list=13%, signal=43%
GO_TRANSFERASE_ACTIVITY_TRANSFERRING_NITROGENOUS_GROUPS	GO_TRANSFERASE_ACTIVITY_TRANSFERRING_NITROGENOUS_GROUPS		19	0.452376	1.19843	0.222672	0.322479	1	1059	tags=11%, list=5%, signal=11%
GO_SMALL_RIBOSOMAL_SUBUNIT	GO_SMALL_RIBOSOMAL_SUBUNIT		70	0.354477	1.19831	0.217391	0.322536	1	8677	tags=67%, list=41%, signal=113%
GO_BEHAVIOR	GO_BEHAVIOR		489	0.315566	1.19801	0	0.322877	1	1974	tags=15%, list=9%, signal=16%
GO_OLIGOSACCHARIDE_METABOLIC_PROCESS	GO_OLIGOSACCHARIDE_METABOLIC_PROCESS		15	0.54379	1.19785	0.335938	0.322925	1	4586	tags=40%, list=21%, signal=51%
GO_SIGNAL_SEQUENCE_BINDING	GO_SIGNAL_SEQUENCE_BINDING		41	0.385477	1.19769	0.224242	0.323124	1	1396	tags=5%, list=7%, signal=5%
GO_PHAGOSOME_ACIDIFICATION	GO_PHAGOSOME_ACIDIFICATION		25	0.468674	1.19737	0.314229	0.323746	1	3983	tags=20%, list=19%, signal=25%
GO_LEUKOCYTE_TETHERING_OR_ROLLING	GO_LEUKOCYTE_TETHERING_OR_ROLLING		15	0.593002	1.19732	0.216319	0.323722	1	2534	tags=40%, list=12%, signal=45%
GO_NEGATIVE_REGULATION_OF_GROWTH	GO_NEGATIVE_REGULATION_OF_GROWTH		214	0.29447	1.19722	0.328063	0.323861	1	2983	tags=15%, list=14%, signal=17%
GO_EMBRYONIC_DIGESTIVE_TRACT_MORPHOGENESIS	GO_EMBRYONIC_DIGESTIVE_TRACT_MORPHOGENESIS		16	0.466986	1.19698	0.196078	0.324163	1	659	tags=19%, list=3%, signal=19%
GO_DENDRITE_MORPHOGENESIS	GO_DENDRITE_MORPHOGENESIS		132	0.280004	1.19678	0.0941884	0.324319	1	3091	tags=13%, list=14%, signal=15%
GO_FEMALE_SEX_DIFFERENTIATION	GO_FEMALE_SEX_DIFFERENTIATION		101	0.307768	1.19657	0.0912863	0.324482	1	997	tags=9%, list=5%, signal=9%
GO_REGULATION_OF_SODIUM_ION_TRANSMEMBRANE_TRANSPORT	GO_REGULATION_OF_SODIUM_ION_TRANSMEMBRANE_TRANSPORT		52	0.363714	1.19649	0.314991	0.324634	1	2613	tags=15%, list=12%, signal=17%
GO_NEGATIVE_REGULATION_OF_CATABOLIC_PROCESS	GO_NEGATIVE_REGULATION_OF_CATABOLIC_PROCESS		255	0.252203	1.19621	0.271429	0.32497	1	3956	tags=12%, list=19%, signal=14%
GO_DNA_TEMPLATED_TRANSCRIPTION_TERMINATION	GO_DNA_TEMPLATED_TRANSCRIPTION_TERMINATION		72	0.290274	1.19611	0	0.324943	1	9524	tags=60%, list=45%, signal=107%
GO_INNATE_IMMUNE_RESPONSE_ACTIVATING_CELL_SURFACE_RECEPTOR_SIGNALING_PATHWAY	GO_INNATE_IMMUNE_RESPONSE_ACTIVATING_CELL_SURFACE_RECEPTOR_SIGNALING_PATHWAY		91	0.384356	1.1958	0.206967	0.325326	1	2767	tags=13%, list=13%, signal=15%
GO_REGULATION_OF_PROTEIN_IMPORT	GO_REGULATION_OF_PROTEIN_IMPORT		52	0.390441	1.19573	0.0963115	0.32527	1	2991	tags=13%, list=14%, signal=16%
GO_PHOSPHOLIPID_TRANSPORT	GO_PHOSPHOLIPID_TRANSPORT		70	0.409761	1.19539	0.310547	0.325651	1	1671	tags=14%, list=8%, signal=15%
GO_BONE_MORPHOGENESIS	GO_BONE_MORPHOGENESIS		94	0.408001	1.195	0.115234	0.326612	1	3232	tags=24%, list=15%, signal=29%
GO_NEGATIVE_REGULATION_OF_T_CELL_PROLIFERATION	GO_NEGATIVE_REGULATION_OF_T_CELL_PROLIFERATION		38	0.410609	1.19452	0.165984	0.327098	1	4164	tags=34%, list=20%, signal=42%
GO_NEGATIVE_REGULATION_OF_EXTRINSIC_APOPTOTIC_SIGNALING_PATHWAY	GO_NEGATIVE_REGULATION_OF_EXTRINSIC_APOPTOTIC_SIGNALING_PATHWAY		87	0.310177	1.19436	0.0910973	0.327446	1	3027	tags=13%, list=14%, signal=15%
GO_MULTIVESICULAR_BODY_SORTING_PATHWAY	GO_MULTIVESICULAR_BODY_SORTING_PATHWAY		32	0.332329	1.19372	0.0973085	0.328382	1	157	tags=3%, list=1%, signal=3%
GO_XENOBIOTIC_METABOLIC_PROCESS	GO_XENOBIOTIC_METABOLIC_PROCESS		70	0.424672	1.19344	0.115914	0.329009	1	1919	tags=16%, list=9%, signal=17%
GO_REGULATION_OF_ADENYLATE_CYCLASE_ACTIVITY	GO_REGULATION_OF_ADENYLATE_CYCLASE_ACTIVITY		21	0.469454	1.19307	0.110465	0.329441	1	2105	tags=19%, list=10%, signal=21%
GO_CD4_POSITIVE_OR_CD8_POSITIVE_ALPHA_BETA_T_CELL_LINEAGE_COMMITMENT	GO_CD4_POSITIVE_OR_CD8_POSITIVE_ALPHA_BETA_T_CELL_LINEAGE_COMMITMENT		15	0.439648	1.19255	0.0971074	0.329815	1	1571	tags=20%, list=7%, signal=22%
GO_RECEPTOR_SIGNALING_PATHWAY_VIA_STAT	GO_RECEPTOR_SIGNALING_PATHWAY_VIA_STAT		95	0.315368	1.19243	0	0.329784	1	2991	tags=19%, list=14%, signal=22%
GO_ANION_ANION_ANTIPORTER_ACTIVITY	GO_ANION_ANION_ANTIPORTER_ACTIVITY		24	0.487886	1.19215	0.221116	0.329988	1	3025	tags=29%, list=14%, signal=34%
GO_MYELOID_LEUKOCYTE_DIFFERENTIATION	GO_MYELOID_LEUKOCYTE_DIFFERENTIATION		150	0.28325	1.1921	0	0.329824	1	2705	tags=14%, list=13%, signal=16%
GO_REGULATION_OF_PROGRAMMED_NECROTIC_CELL_DEATH	GO_REGULATION_OF_PROGRAMMED_NECROTIC_CELL_DEATH		16	0.46275	1.19207	0.111328	0.329724	1	4972	tags=31%, list=23%, signal=41%
GO_RIBOSOMAL_LARGE_SUBUNIT_ASSEMBLY	GO_RIBOSOMAL_LARGE_SUBUNIT_ASSEMBLY		27	0.448415	1.19191	0.224206	0.32979	1	8121	tags=56%, list=38%, signal=90%
GO_REGULATION_OF_CELLULAR_PROTEIN_CATABOLIC_PROCESS	GO_REGULATION_OF_CELLULAR_PROTEIN_CATABOLIC_PROCESS		225	0.218103	1.19189	0.206122	0.32966	1	3994	tags=9%, list=19%, signal=11%
GO_NEGATIVE_REGULATION_OF_EMBRYONIC_DEVELOPMENT	GO_NEGATIVE_REGULATION_OF_EMBRYONIC_DEVELOPMENT		25	0.381345	1.1914	0.0781563	0.330442	1	3953	tags=28%, list=19%, signal=34%
GO_NITRIC_OXIDE_MEDIATED_SIGNAL_TRANSDUCTION	GO_NITRIC_OXIDE_MEDIATED_SIGNAL_TRANSDUCTION		22	0.447097	1.19094	0	0.331289	1	1487	tags=27%, list=7%, signal=29%
GO_INTEGRIN_MEDIATED_SIGNALING_PATHWAY	GO_INTEGRIN_MEDIATED_SIGNALING_PATHWAY		79	0.344598	1.19029	0.0849421	0.332185	1	1381	tags=11%, list=6%, signal=12%
GO_NEGATIVE_REGULATION_OF_PROTEASOMAL_PROTEIN_CATABOLIC_PROCESS	GO_NEGATIVE_REGULATION_OF_PROTEASOMAL_PROTEIN_CATABOLIC_PROCESS		51	0.376178	1.18997	0.377358	0.332652	1	2522	tags=8%, list=12%, signal=9%
GO_REGULATION_OF_TRANSPORTER_ACTIVITY	GO_REGULATION_OF_TRANSPORTER_ACTIVITY		211	0.337199	1.18982	0.206963	0.332788	1	2613	tags=19%, list=12%, signal=22%
GO_CELLULAR_RESPONSE_TO_STEROL	GO_CELLULAR_RESPONSE_TO_STEROL		18	0.543763	1.18957	0.291667	0.333267	1	1572	tags=17%, list=7%, signal=18%
GO_POSITIVE_REGULATION_OF_VASCULAR_SMOOTH_MUSCLE_CELL_PROLIFERATION	GO_POSITIVE_REGULATION_OF_VASCULAR_SMOOTH_MUSCLE_CELL_PROLIFERATION		28	0.346714	1.18949	0.313131	0.333236	1	2697	tags=18%, list=13%, signal=20%
GO_REGULATION_OF_JUN_KINASE_ACTIVITY	GO_REGULATION_OF_JUN_KINASE_ACTIVITY		75	0.257945	1.18882	0.0834915	0.333732	1	2653	tags=9%, list=12%, signal=11%
GO_RESPONSE_TO_PROGESTERONE	GO_RESPONSE_TO_PROGESTERONE		39	0.425467	1.18867	0.124	0.333812	1	1627	tags=15%, list=8%, signal=17%
GO_ATRIOVENTRICULAR_VALVE_DEVELOPMENT	GO_ATRIOVENTRICULAR_VALVE_DEVELOPMENT		22	0.45877	1.18858	0.236111	0.333855	1	4564	tags=27%, list=21%, signal=35%
GO_ASSOCIATIVE_LEARNING	GO_ASSOCIATIVE_LEARNING		64	0.41637	1.18849	0.222222	0.333807	1	3698	tags=23%, list=17%, signal=28%
GO_REGULATION_OF_LIPID_KINASE_ACTIVITY	GO_REGULATION_OF_LIPID_KINASE_ACTIVITY		51	0.353389	1.18826	0.173996	0.334046	1	3921	tags=25%, list=18%, signal=31%
GO_CELLULAR_RESPONSE_TO_EXOGENOUS_DSRNA	GO_CELLULAR_RESPONSE_TO_EXOGENOUS_DSRNA		15	0.601753	1.18822	0	0.333914	1	3790	tags=27%, list=18%, signal=32%
GO_PATTERN_RECOGNITION_RECEPTOR_SIGNALING_PATHWAY	GO_PATTERN_RECOGNITION_RECEPTOR_SIGNALING_PATHWAY		145	0.361424	1.18822	0.115234	0.333775	1	2904	tags=17%, list=14%, signal=19%
GO_E_BOX_BINDING	GO_E_BOX_BINDING		41	0.420689	1.18801	0.216634	0.334063	1	2431	tags=15%, list=11%, signal=16%
GO_NEGATIVE_REGULATION_OF_LEUKOCYTE_CELL_CELL_ADHESION	GO_NEGATIVE_REGULATION_OF_LEUKOCYTE_CELL_CELL_ADHESION		80	0.50372	1.18791	0	0.334108	1	4164	tags=40%, list=20%, signal=50%
GO_IRON_ION_HOMEOSTASIS	GO_IRON_ION_HOMEOSTASIS		69	0.419071	1.18765	0.299048	0.334349	1	4257	tags=19%, list=20%, signal=23%
GO_SOLUTE_PROTON_SYMPORTER_ACTIVITY	GO_SOLUTE_PROTON_SYMPORTER_ACTIVITY		19	0.555637	1.18744	0.238189	0.334481	1	3365	tags=26%, list=16%, signal=31%
GO_CALCIUM_ION_REGULATED_EXOCYTOSIS_OF_NEUROTRANSMITTER	GO_CALCIUM_ION_REGULATED_EXOCYTOSIS_OF_NEUROTRANSMITTER		15	0.437427	1.18738	0.254302	0.334544	1	2136	tags=40%, list=10%, signal=44%
GO_RESPONSE_TO_ARSENIC_CONTAINING_SUBSTANCE	GO_RESPONSE_TO_ARSENIC_CONTAINING_SUBSTANCE		30	0.538163	1.18716	0.235178	0.334545	1	2712	tags=17%, list=13%, signal=19%
GO_ANION_TRANSMEMBRANE_TRANSPORTER_ACTIVITY	GO_ANION_TRANSMEMBRANE_TRANSPORTER_ACTIVITY		233	0.311332	1.18696	0.0901804	0.33482	1	2489	tags=13%, list=12%, signal=14%
GO_RESPONSE_TO_ESTRADIOL	GO_RESPONSE_TO_ESTRADIOL		109	0.315156	1.18696	0	0.334655	1	2042	tags=12%, list=10%, signal=13%
GO_PEPTIDE_BINDING	GO_PEPTIDE_BINDING		232	0.302457	1.18684	0.0827068	0.334738	1	1880	tags=10%, list=9%, signal=11%
GO_THREONINE_TYPE_PEPTIDASE_ACTIVITY	GO_THREONINE_TYPE_PEPTIDASE_ACTIVITY		18	0.541965	1.18683	0.339921	0.33472	1	8902	tags=67%, list=42%, signal=114%
GO_PERICARDIUM_DEVELOPMENT	GO_PERICARDIUM_DEVELOPMENT		18	0.423253	1.18663	0.191651	0.334908	1	2653	tags=22%, list=12%, signal=25%
GO_ODONTOGENESIS_OF_DENTIN_CONTAINING_TOOTH	GO_ODONTOGENESIS_OF_DENTIN_CONTAINING_TOOTH		78	0.336085	1.18647	0	0.335006	1	1782	tags=14%, list=8%, signal=15%
GO_NEGATIVE_REGULATION_OF_ION_TRANSPORT	GO_NEGATIVE_REGULATION_OF_ION_TRANSPORT		108	0.391422	1.1864	0.193548	0.33494	1	2198	tags=18%, list=10%, signal=20%
GO_SULFUR_COMPOUND_METABOLIC_PROCESS	GO_SULFUR_COMPOUND_METABOLIC_PROCESS		163	0.321641	1.18626	0.192149	0.335054	1	3025	tags=14%, list=14%, signal=16%
GO_CLATHRIN_COATED_VESICLE_MEMBRANE	GO_CLATHRIN_COATED_VESICLE_MEMBRANE		95	0.350471	1.18612	0.203557	0.335179	1	1477	tags=11%, list=7%, signal=11%
GO_CHONDROCYTE_DIFFERENTIATION_INVOLVED_IN_ENDOCHONDRAL_BONE_MORPHOGENESIS	GO_CHONDROCYTE_DIFFERENTIATION_INVOLVED_IN_ENDOCHONDRAL_BONE_MORPHOGENESIS		24	0.418455	1.18608	0.189024	0.335086	1	3108	tags=21%, list=15%, signal=24%
GO_NEGATIVE_REGULATION_OF_LYMPHOCYTE_ACTIVATION	GO_NEGATIVE_REGULATION_OF_LYMPHOCYTE_ACTIVATION		95	0.472107	1.18565	0	0.335788	1	4593	tags=41%, list=22%, signal=52%
GO_PRESYNAPTIC_ENDOCYTOSIS	GO_PRESYNAPTIC_ENDOCYTOSIS		53	0.394019	1.18534	0.190578	0.336092	1	1543	tags=13%, list=7%, signal=14%
GO_DIGESTION	GO_DIGESTION		73	0.430709	1.18525	0.11753	0.336057	1	2276	tags=27%, list=11%, signal=31%
GO_ORGANOPHOSPHATE_ESTER_TRANSPORT	GO_ORGANOPHOSPHATE_ESTER_TRANSPORT		94	0.380667	1.18452	0.111328	0.337455	1	3135	tags=18%, list=15%, signal=21%
GO_REGULATION_OF_ERAD_PATHWAY	GO_REGULATION_OF_ERAD_PATHWAY		28	0.291325	1.18451	0.0917969	0.33734	1	4649	tags=14%, list=22%, signal=18%
GO_HSP70_PROTEIN_BINDING	GO_HSP70_PROTEIN_BINDING		39	0.363514	1.1844	0.342412	0.337269	1	1025	tags=8%, list=5%, signal=8%
GO_DEFENSE_RESPONSE_TO_BACTERIUM	GO_DEFENSE_RESPONSE_TO_BACTERIUM		108	0.371877	1.18428	0	0.337246	1	1563	tags=18%, list=7%, signal=19%
GO_POSITIVE_REGULATION_OF_PEPTIDE_HORMONE_SECRETION	GO_POSITIVE_REGULATION_OF_PEPTIDE_HORMONE_SECRETION		73	0.410224	1.18425	0.221116	0.337082	1	2396	tags=18%, list=11%, signal=20%
GO_SNARE_COMPLEX_ASSEMBLY	GO_SNARE_COMPLEX_ASSEMBLY		17	0.410276	1.18419	0.196498	0.33695	1	5327	tags=35%, list=25%, signal=47%
GO_POSITIVE_REGULATION_OF_LYASE_ACTIVITY	GO_POSITIVE_REGULATION_OF_LYASE_ACTIVITY		15	0.440652	1.18418	0.10387	0.336786	1	406	tags=13%, list=2%, signal=14%
GO_THYMOCYTE_APOPTOTIC_PROCESS	GO_THYMOCYTE_APOPTOTIC_PROCESS		17	0.557164	1.18404	0.217143	0.336803	1	5320	tags=41%, list=25%, signal=55%
GO_RESPONSE_TO_TOXIC_SUBSTANCE	GO_RESPONSE_TO_TOXIC_SUBSTANCE		394	0.303839	1.18387	0.0905588	0.337005	1	3247	tags=16%, list=15%, signal=18%
GO_RESPONSE_TO_DIETARY_EXCESS	GO_RESPONSE_TO_DIETARY_EXCESS		19	0.493922	1.18376	0.266525	0.337022	1	1961	tags=32%, list=9%, signal=35%
GO_CHLORIDE_TRANSMEMBRANE_TRANSPORTER_ACTIVITY	GO_CHLORIDE_TRANSMEMBRANE_TRANSPORTER_ACTIVITY		70	0.403226	1.1836	0.0905433	0.337031	1	381	tags=11%, list=2%, signal=12%
GO_CARBOHYDRATE_DERIVATIVE_TRANSPORT	GO_CARBOHYDRATE_DERIVATIVE_TRANSPORT		61	0.355113	1.18337	0.190283	0.337515	1	3037	tags=11%, list=14%, signal=13%
GO_RESPONSE_TO_DSRNA	GO_RESPONSE_TO_DSRNA		36	0.482507	1.18297	0.183505	0.338248	1	4799	tags=28%, list=22%, signal=36%
GO_SULFUR_COMPOUND_CATABOLIC_PROCESS	GO_SULFUR_COMPOUND_CATABOLIC_PROCESS		38	0.38003	1.18288	0.277778	0.338157	1	2018	tags=18%, list=9%, signal=20%
GO_REGULATION_OF_BONE_MINERALIZATION	GO_REGULATION_OF_BONE_MINERALIZATION		55	0.377978	1.18274	0.22179	0.338285	1	4430	tags=36%, list=21%, signal=46%
GO_NEUROPEPTIDE_BINDING	GO_NEUROPEPTIDE_BINDING		15	0.53377	1.18263	0.198783	0.338229	1	3857	tags=47%, list=18%, signal=57%
GO_CALCIUM_RELEASE_CHANNEL_ACTIVITY	GO_CALCIUM_RELEASE_CHANNEL_ACTIVITY		21	0.393618	1.18212	0.121331	0.339029	1	2402	tags=19%, list=11%, signal=21%
GO_EAR_MORPHOGENESIS	GO_EAR_MORPHOGENESIS		101	0.365805	1.18199	0	0.338898	1	2702	tags=18%, list=13%, signal=20%
GO_LYMPHOCYTE_MEDIATED_IMMUNITY	GO_LYMPHOCYTE_MEDIATED_IMMUNITY		159	0.330477	1.18191	0	0.338849	1	3582	tags=20%, list=17%, signal=24%
GO_POSTSYNAPSE_ORGANIZATION	GO_POSTSYNAPSE_ORGANIZATION		146	0.325872	1.18146	0	0.339383	1	3091	tags=18%, list=14%, signal=21%
GO_PROTEIN_LOCALIZATION_TO_SYNAPSE	GO_PROTEIN_LOCALIZATION_TO_SYNAPSE		73	0.354879	1.18128	0	0.33949	1	973	tags=11%, list=5%, signal=11%
GO_NEGATIVE_REGULATION_OF_LYMPHOCYTE_MEDIATED_IMMUNITY	GO_NEGATIVE_REGULATION_OF_LYMPHOCYTE_MEDIATED_IMMUNITY		23	0.398228	1.18127	0	0.33936	1	2407	tags=30%, list=11%, signal=34%
GO_AZUROPHIL_GRANULE_MEMBRANE	GO_AZUROPHIL_GRANULE_MEMBRANE		48	0.325296	1.18112	0.200855	0.339442	1	205	tags=4%, list=1%, signal=4%
GO_REGULATION_OF_PROTEASOMAL_PROTEIN_CATABOLIC_PROCESS	GO_REGULATION_OF_PROTEASOMAL_PROTEIN_CATABOLIC_PROCESS		170	0.230506	1.18028	0.0795918	0.340675	1	4763	tags=12%, list=22%, signal=15%
GO_RESPONSE_TO_INTERLEUKIN_7	GO_RESPONSE_TO_INTERLEUKIN_7		37	0.442493	1.1802	0.0820312	0.340582	1	5013	tags=30%, list=23%, signal=39%
GO_NEGATIVE_REGULATION_OF_LEUKOCYTE_PROLIFERATION	GO_NEGATIVE_REGULATION_OF_LEUKOCYTE_PROLIFERATION		48	0.41659	1.17976	0.0860656	0.341392	1	4164	tags=33%, list=20%, signal=41%
GO_REGULATION_OF_GTPASE_ACTIVITY	GO_REGULATION_OF_GTPASE_ACTIVITY		403	0.257051	1.17918	0.194617	0.341983	1	3159	tags=12%, list=15%, signal=13%
GO_POSITIVE_REGULATION_OF_TUMOR_NECROSIS_FACTOR_SUPERFAMILY_CYTOKINE_PRODUCTION	GO_POSITIVE_REGULATION_OF_TUMOR_NECROSIS_FACTOR_SUPERFAMILY_CYTOKINE_PRODUCTION		56	0.439022	1.17918	0.204589	0.341845	1	2653	tags=30%, list=12%, signal=35%
GO_NATURAL_KILLER_CELL_ACTIVATION	GO_NATURAL_KILLER_CELL_ACTIVATION		46	0.332502	1.17915	0.0914397	0.34168	1	2185	tags=17%, list=10%, signal=19%
GO_CYTOSOLIC_RIBOSOME	GO_CYTOSOLIC_RIBOSOME		106	0.420656	1.17895	0.203125	0.341828	1	9006	tags=75%, list=42%, signal=130%
GO_TRANSCRIPTION_COREPRESSOR_ACTIVITY	GO_TRANSCRIPTION_COREPRESSOR_ACTIVITY		216	0.207726	1.17895	0	0.341663	1	4065	tags=13%, list=19%, signal=15%
GO_NEGATIVE_REGULATION_OF_MEGAKARYOCYTE_DIFFERENTIATION	GO_NEGATIVE_REGULATION_OF_MEGAKARYOCYTE_DIFFERENTIATION		16	0.574518	1.17885	0.31619	0.341717	1	4548	tags=25%, list=21%, signal=32%
GO_PROTEASOME_CORE_COMPLEX	GO_PROTEASOME_CORE_COMPLEX		18	0.529798	1.17882	0.339921	0.341552	1	8902	tags=67%, list=42%, signal=114%
GO_NEGATIVE_REGULATION_OF_MICROTUBULE_POLYMERIZATION_OR_DEPOLYMERIZATION	GO_NEGATIVE_REGULATION_OF_MICROTUBULE_POLYMERIZATION_OR_DEPOLYMERIZATION		32	0.381928	1.17875	0.390946	0.341569	1	343	tags=6%, list=2%, signal=6%
GO_NEGATIVE_REGULATION_OF_T_CELL_DIFFERENTIATION	GO_NEGATIVE_REGULATION_OF_T_CELL_DIFFERENTIATION		33	0.540884	1.17872	0	0.341405	1	4319	tags=45%, list=20%, signal=57%
GO_CLEAVAGE_INVOLVED_IN_RRNA_PROCESSING	GO_CLEAVAGE_INVOLVED_IN_RRNA_PROCESSING		21	0.352734	1.17871	0	0.341294	1	8848	tags=57%, list=41%, signal=98%
GO_DEMETHYLATION	GO_DEMETHYLATION		55	0.293005	1.1787	0.105155	0.34113	1	985	tags=5%, list=5%, signal=6%
GO_RESPONSE_TO_BACTERIUM	GO_RESPONSE_TO_BACTERIUM		368	0.327425	1.17811	0.104762	0.341957	1	3212	tags=21%, list=15%, signal=24%
GO_REGULATION_OF_REACTIVE_OXYGEN_SPECIES_BIOSYNTHETIC_PROCESS	GO_REGULATION_OF_REACTIVE_OXYGEN_SPECIES_BIOSYNTHETIC_PROCESS		66	0.358894	1.17807	0.213333	0.341853	1	3790	tags=26%, list=18%, signal=31%
GO_NEGATIVE_REGULATION_OF_CELL_GROWTH	GO_NEGATIVE_REGULATION_OF_CELL_GROWTH		161	0.284727	1.17785	0.2147	0.342139	1	2983	tags=14%, list=14%, signal=16%
GO_CALCIUM_ION_REGULATED_EXOCYTOSIS	GO_CALCIUM_ION_REGULATED_EXOCYTOSIS		135	0.32638	1.17772	0.126016	0.342088	1	1116	tags=12%, list=5%, signal=12%
GO_GLOMERULAR_EPITHELIUM_DEVELOPMENT	GO_GLOMERULAR_EPITHELIUM_DEVELOPMENT		17	0.450906	1.17746	0.104762	0.342374	1	435	tags=18%, list=2%, signal=18%
GO_TOR_COMPLEX	GO_TOR_COMPLEX		15	0.404582	1.177	0.101562	0.34315	1	5066	tags=20%, list=24%, signal=26%
GO_CHONDROCYTE_DIFFERENTIATION	GO_CHONDROCYTE_DIFFERENTIATION		107	0.284824	1.17697	0.0880503	0.342985	1	3269	tags=17%, list=15%, signal=20%
GO_NEUROMUSCULAR_JUNCTION_DEVELOPMENT	GO_NEUROMUSCULAR_JUNCTION_DEVELOPMENT		43	0.348608	1.17666	0.226994	0.343382	1	5132	tags=37%, list=24%, signal=49%
GO_CELLULAR_RESPONSE_TO_ATP	GO_CELLULAR_RESPONSE_TO_ATP		15	0.508606	1.17649	0.165984	0.343554	1	2269	tags=33%, list=11%, signal=37%
GO_MODIFIED_AMINO_ACID_BINDING	GO_MODIFIED_AMINO_ACID_BINDING		75	0.372434	1.17638	0	0.343589	1	1073	tags=12%, list=5%, signal=13%
GO_SEGMENTATION	GO_SEGMENTATION		88	0.35168	1.17604	0.199605	0.343883	1	3058	tags=24%, list=14%, signal=28%
GO_RRNA_METHYLATION	GO_RRNA_METHYLATION		26	0.418311	1.17526	0.0996094	0.344726	1	2504	tags=15%, list=12%, signal=17%
GO_PROSTANOID_BIOSYNTHETIC_PROCESS	GO_PROSTANOID_BIOSYNTHETIC_PROCESS		21	0.507765	1.17504	0.0963115	0.34506	1	2490	tags=29%, list=12%, signal=32%
GO_CONNECTIVE_TISSUE_DEVELOPMENT	GO_CONNECTIVE_TISSUE_DEVELOPMENT		227	0.275253	1.17487	0.0838323	0.345101	1	2709	tags=15%, list=13%, signal=16%
GO_MAMMARY_GLAND_EPITHELIAL_CELL_DIFFERENTIATION	GO_MAMMARY_GLAND_EPITHELIAL_CELL_DIFFERENTIATION		15	0.418164	1.17482	0.193617	0.345066	1	180	tags=7%, list=1%, signal=7%
GO_ICOSANOID_BIOSYNTHETIC_PROCESS	GO_ICOSANOID_BIOSYNTHETIC_PROCESS		29	0.437948	1.17464	0.180915	0.34505	1	2490	tags=21%, list=12%, signal=23%
GO_RESPONSE_TO_PLATELET_DERIVED_GROWTH_FACTOR	GO_RESPONSE_TO_PLATELET_DERIVED_GROWTH_FACTOR		19	0.436137	1.17458	0.372984	0.344952	1	4924	tags=26%, list=23%, signal=34%
GO_PROTEIN_HOMOTRIMERIZATION	GO_PROTEIN_HOMOTRIMERIZATION		23	0.516084	1.17445	0.187625	0.344995	1	2300	tags=26%, list=11%, signal=29%
GO_ISOPRENOID_BIOSYNTHETIC_PROCESS	GO_ISOPRENOID_BIOSYNTHETIC_PROCESS		19	0.461165	1.17433	0.310547	0.345164	1	3132	tags=16%, list=15%, signal=18%
GO_POSITIVE_REGULATION_OF_TISSUE_REMODELING	GO_POSITIVE_REGULATION_OF_TISSUE_REMODELING		22	0.421207	1.17378	0	0.345883	1	1980	tags=18%, list=9%, signal=20%
GO_POSITIVE_REGULATION_OF_BLOOD_VESSEL_ENDOTHELIAL_CELL_MIGRATION	GO_POSITIVE_REGULATION_OF_BLOOD_VESSEL_ENDOTHELIAL_CELL_MIGRATION		49	0.342545	1.17354	0.0947581	0.346234	1	1786	tags=14%, list=8%, signal=16%
GO_PROTEIN_FOLDING	GO_PROTEIN_FOLDING		201	0.230292	1.17352	0.116327	0.346208	1	1708	tags=4%, list=8%, signal=4%
GO_REGULATION_OF_NON_CANONICAL_WNT_SIGNALING_PATHWAY	GO_REGULATION_OF_NON_CANONICAL_WNT_SIGNALING_PATHWAY		20	0.488397	1.1735	0.0917969	0.346083	1	5027	tags=45%, list=24%, signal=59%
GO_CELLULAR_MODIFIED_AMINO_ACID_CATABOLIC_PROCESS	GO_CELLULAR_MODIFIED_AMINO_ACID_CATABOLIC_PROCESS		21	0.440266	1.17346	0	0.345979	1	1710	tags=24%, list=8%, signal=26%
GO_PHAGOCYTIC_VESICLE	GO_PHAGOCYTIC_VESICLE		114	0.264771	1.17344	0.198758	0.345877	1	2449	tags=9%, list=11%, signal=10%
GO_CELLULAR_MODIFIED_AMINO_ACID_BIOSYNTHETIC_PROCESS	GO_CELLULAR_MODIFIED_AMINO_ACID_BIOSYNTHETIC_PROCESS		38	0.358006	1.17307	0.335938	0.346296	1	4005	tags=21%, list=19%, signal=26%
GO_PROTEIN_INSERTION_INTO_MEMBRANE	GO_PROTEIN_INSERTION_INTO_MEMBRANE		56	0.290386	1.17272	0.0833333	0.34684	1	5119	tags=20%, list=24%, signal=26%
GO_NEGATIVE_REGULATION_OF_AXONOGENESIS	GO_NEGATIVE_REGULATION_OF_AXONOGENESIS		63	0.390581	1.17249	0.212302	0.347078	1	2683	tags=22%, list=13%, signal=25%
GO_PROTEIN_KINASE_C_SIGNALING	GO_PROTEIN_KINASE_C_SIGNALING		18	0.462572	1.17238	0.32233	0.347093	1	4404	tags=39%, list=21%, signal=49%
GO_INTERLEUKIN_7_MEDIATED_SIGNALING_PATHWAY	GO_INTERLEUKIN_7_MEDIATED_SIGNALING_PATHWAY		28	0.474632	1.17225	0	0.347097	1	2778	tags=21%, list=13%, signal=25%
GO_SARCOLEMMA	GO_SARCOLEMMA		119	0.296151	1.17135	0	0.348742	1	2204	tags=13%, list=10%, signal=15%
GO_REGULATION_OF_HORMONE_METABOLIC_PROCESS	GO_REGULATION_OF_HORMONE_METABOLIC_PROCESS		31	0.356583	1.17005	0.19697	0.350702	1	2572	tags=19%, list=12%, signal=22%
GO_PROTEIN_LOCALIZATION_TO_CELL_PERIPHERY	GO_PROTEIN_LOCALIZATION_TO_CELL_PERIPHERY		286	0.259478	1.16991	0	0.350798	1	1603	tags=7%, list=8%, signal=7%
GO_MRNA_TRANSPORT	GO_MRNA_TRANSPORT		144	0.220753	1.16986	0.189349	0.35081	1	8738	tags=40%, list=41%, signal=68%
GO_NEGATIVE_REGULATION_OF_CELL_CYCLE_PHASE_TRANSITION	GO_NEGATIVE_REGULATION_OF_CELL_CYCLE_PHASE_TRANSITION		222	0.181689	1.16983	0.203125	0.350717	1	6182	tags=20%, list=29%, signal=28%
GO_VASCULAR_ASSOCIATED_SMOOTH_MUSCLE_CELL_MIGRATION	GO_VASCULAR_ASSOCIATED_SMOOTH_MUSCLE_CELL_MIGRATION		21	0.414162	1.16969	0.181641	0.350678	1	1399	tags=14%, list=7%, signal=15%
GO_CELLULAR_DEFENSE_RESPONSE	GO_CELLULAR_DEFENSE_RESPONSE		22	0.468471	1.16946	0.0775348	0.350969	1	1403	tags=18%, list=7%, signal=19%
GO_POSITIVE_REGULATION_OF_LIPID_BIOSYNTHETIC_PROCESS	GO_POSITIVE_REGULATION_OF_LIPID_BIOSYNTHETIC_PROCESS		59	0.38021	1.16869	0.285714	0.352268	1	2773	tags=17%, list=13%, signal=19%
GO_TRABECULA_MORPHOGENESIS	GO_TRABECULA_MORPHOGENESIS		44	0.34612	1.16866	0.0847784	0.352218	1	19	tags=2%, list=0%, signal=2%
GO_NEUROMUSCULAR_JUNCTION	GO_NEUROMUSCULAR_JUNCTION		70	0.331386	1.16862	0.189024	0.352085	1	3261	tags=20%, list=15%, signal=24%
GO_CAMERA_TYPE_EYE_MORPHOGENESIS	GO_CAMERA_TYPE_EYE_MORPHOGENESIS		96	0.401614	1.16861	0.21875	0.351918	1	2698	tags=19%, list=13%, signal=21%
GO_ORGANIC_ACID_BINDING	GO_ORGANIC_ACID_BINDING		151	0.355954	1.16858	0.0982659	0.351787	1	1738	tags=11%, list=8%, signal=11%
GO_REGULATION_OF_MAST_CELL_ACTIVATION_INVOLVED_IN_IMMUNE_RESPONSE	GO_REGULATION_OF_MAST_CELL_ACTIVATION_INVOLVED_IN_IMMUNE_RESPONSE		22	0.436068	1.16834	0.0909091	0.352342	1	1712	tags=18%, list=8%, signal=20%
GO_CAMERA_TYPE_EYE_DEVELOPMENT	GO_CAMERA_TYPE_EYE_DEVELOPMENT		259	0.305118	1.16799	0.104364	0.352899	1	2709	tags=15%, list=13%, signal=17%
GO_REGULATION_OF_CALCIUM_ION_TRANSMEMBRANE_TRANSPORTER_ACTIVITY	GO_REGULATION_OF_CALCIUM_ION_TRANSMEMBRANE_TRANSPORTER_ACTIVITY		67	0.372325	1.16785	0.104762	0.352836	1	2468	tags=19%, list=12%, signal=22%
GO_REGULATION_OF_GLIAL_CELL_DIFFERENTIATION	GO_REGULATION_OF_GLIAL_CELL_DIFFERENTIATION		58	0.376948	1.16783	0.0991903	0.352776	1	622	tags=10%, list=3%, signal=11%
GO_CLATHRIN_COATED_ENDOCYTIC_VESICLE_MEMBRANE	GO_CLATHRIN_COATED_ENDOCYTIC_VESICLE_MEMBRANE		36	0.45782	1.16734	0.232246	0.353614	1	1477	tags=11%, list=7%, signal=12%
GO_CELLULAR_RESPONSE_TO_ALCOHOL	GO_CELLULAR_RESPONSE_TO_ALCOHOL		70	0.334524	1.16732	0.113095	0.353513	1	4357	tags=24%, list=20%, signal=30%
GO_ER_NUCLEUS_SIGNALING_PATHWAY	GO_ER_NUCLEUS_SIGNALING_PATHWAY		43	0.322131	1.16713	0.361328	0.3537	1	5700	tags=23%, list=27%, signal=32%
GO_POSITIVE_REGULATION_OF_ATPASE_ACTIVITY	GO_POSITIVE_REGULATION_OF_ATPASE_ACTIVITY		45	0.297253	1.16666	0.319588	0.354001	1	65	tags=2%, list=0%, signal=2%
GO_POSITIVE_REGULATION_OF_OSSIFICATION	GO_POSITIVE_REGULATION_OF_OSSIFICATION		73	0.341673	1.16624	0.177645	0.354659	1	3588	tags=23%, list=17%, signal=28%
GO_RRNA_MODIFICATION	GO_RRNA_MODIFICATION		35	0.360135	1.16618	0.273438	0.354522	1	2504	tags=11%, list=12%, signal=13%
GO_NEURON_SPINE	GO_NEURON_SPINE		145	0.315847	1.16618	0.0986717	0.354355	1	2924	tags=18%, list=14%, signal=21%
GO_SOLUTE_SODIUM_SYMPORTER_ACTIVITY	GO_SOLUTE_SODIUM_SYMPORTER_ACTIVITY		42	0.444359	1.16561	0.220503	0.355132	1	2192	tags=24%, list=10%, signal=26%
GO_NIK_NF_KAPPAB_SIGNALING	GO_NIK_NF_KAPPAB_SIGNALING		138	0.294657	1.16546	0.321705	0.355393	1	2185	tags=11%, list=10%, signal=12%
GO_REGULATION_OF_VASOCONSTRICTION	GO_REGULATION_OF_VASOCONSTRICTION		41	0.497371	1.16499	0.111328	0.356226	1	2198	tags=34%, list=10%, signal=38%
GO_SMALL_GTPASE_BINDING	GO_SMALL_GTPASE_BINDING		407	0.210814	1.16479	0	0.356386	1	1910	tags=6%, list=9%, signal=7%
GO_LONG_CHAIN_FATTY_ACID_IMPORT_INTO_CELL	GO_LONG_CHAIN_FATTY_ACID_IMPORT_INTO_CELL		15	0.588541	1.16442	0.220703	0.356948	1	3520	tags=27%, list=16%, signal=32%
GO_HEART_TRABECULA_MORPHOGENESIS	GO_HEART_TRABECULA_MORPHOGENESIS		30	0.414625	1.16417	0.210736	0.357054	1	19	tags=3%, list=0%, signal=3%
GO_VISUAL_BEHAVIOR	GO_VISUAL_BEHAVIOR		47	0.440455	1.16404	0.410058	0.357092	1	3784	tags=26%, list=18%, signal=31%
GO_ERBB2_SIGNALING_PATHWAY	GO_ERBB2_SIGNALING_PATHWAY		28	0.417426	1.16397	0.191147	0.35699	1	876	tags=11%, list=4%, signal=11%
GO_NEGATIVE_REGULATION_OF_MAPK_CASCADE	GO_NEGATIVE_REGULATION_OF_MAPK_CASCADE		144	0.276703	1.16305	0.214844	0.358274	1	4357	tags=18%, list=20%, signal=23%
GO_GLYCOSYLATION	GO_GLYCOSYLATION		223	0.2791	1.16274	0.11753	0.358693	1	4417	tags=19%, list=21%, signal=24%
GO_ANGIOGENESIS_INVOLVED_IN_WOUND_HEALING	GO_ANGIOGENESIS_INVOLVED_IN_WOUND_HEALING		18	0.403432	1.16208	0.193548	0.359813	1	2995	tags=33%, list=14%, signal=39%
GO_INTERCELLULAR_BRIDGE	GO_INTERCELLULAR_BRIDGE		53	0.363333	1.16194	0.192229	0.359927	1	610	tags=6%, list=3%, signal=6%
GO_REGULATION_OF_MAMMARY_GLAND_EPITHELIAL_CELL_PROLIFERATION	GO_REGULATION_OF_MAMMARY_GLAND_EPITHELIAL_CELL_PROLIFERATION		17	0.492576	1.16188	0.129707	0.359836	1	180	tags=6%, list=1%, signal=6%
GO_RNA_SURVEILLANCE	GO_RNA_SURVEILLANCE		15	0.301641	1.16121	0	0.360829	1	7105	tags=47%, list=33%, signal=70%
GO_REGULATION_OF_PLASMA_LIPOPROTEIN_PARTICLE_LEVELS	GO_REGULATION_OF_PLASMA_LIPOPROTEIN_PARTICLE_LEVELS		63	0.36524	1.16113	0.117063	0.3607	1	1712	tags=13%, list=8%, signal=14%
GO_POSITIVE_REGULATION_OF_HISTONE_H3_K4_METHYLATION	GO_POSITIVE_REGULATION_OF_HISTONE_H3_K4_METHYLATION		15	0.470031	1.16112	0.111328	0.360565	1	4112	tags=20%, list=19%, signal=25%
GO_CALCIUM_ION_IMPORT	GO_CALCIUM_ION_IMPORT		57	0.426321	1.16099	0	0.360608	1	2787	tags=26%, list=13%, signal=30%
GO_MUSCLE_CELL_PROLIFERATION	GO_MUSCLE_CELL_PROLIFERATION		159	0.297604	1.16083	0.102	0.360825	1	3030	tags=18%, list=14%, signal=21%
GO_REGULATION_OF_BLOOD_PRESSURE	GO_REGULATION_OF_BLOOD_PRESSURE		128	0.377468	1.16062	0.107422	0.361139	1	2552	tags=26%, list=12%, signal=29%
GO_PROTEIN_DESTABILIZATION	GO_PROTEIN_DESTABILIZATION		37	0.234757	1.16055	0.293878	0.361061	1	592	tags=3%, list=3%, signal=3%
GO_PHOSPHATASE_ACTIVITY	GO_PHOSPHATASE_ACTIVITY		235	0.275516	1.16034	0	0.361465	1	3427	tags=15%, list=16%, signal=18%
GO_REGULATION_OF_VASCULAR_PERMEABILITY	GO_REGULATION_OF_VASCULAR_PERMEABILITY		26	0.437288	1.16034	0.11368	0.361297	1	1933	tags=19%, list=9%, signal=21%
GO_EPITHELIAL_CELL_PROLIFERATION	GO_EPITHELIAL_CELL_PROLIFERATION		310	0.283309	1.16028	0	0.361129	1	2904	tags=16%, list=14%, signal=19%
GO_SODIUM_ION_TRANSMEMBRANE_TRANSPORTER_ACTIVITY	GO_SODIUM_ION_TRANSMEMBRANE_TRANSPORTER_ACTIVITY		103	0.374075	1.16027	0.104364	0.361009	1	2787	tags=28%, list=13%, signal=32%
GO_POTASSIUM_ION_TRANSMEMBRANE_TRANSPORTER_ACTIVITY	GO_POTASSIUM_ION_TRANSMEMBRANE_TRANSPORTER_ACTIVITY		121	0.371496	1.15962	0.115854	0.362265	1	2915	tags=29%, list=14%, signal=33%
GO_REGULATION_OF_PROTEIN_LOCALIZATION_TO_MEMBRANE	GO_REGULATION_OF_PROTEIN_LOCALIZATION_TO_MEMBRANE		162	0.256673	1.15953	0.196881	0.362182	1	3558	tags=14%, list=17%, signal=16%
GO_NEUTRAL_LIPID_METABOLIC_PROCESS	GO_NEUTRAL_LIPID_METABOLIC_PROCESS		85	0.348854	1.15949	0.11501	0.362156	1	3398	tags=15%, list=16%, signal=18%
GO_ANTIMICROBIAL_HUMORAL_IMMUNE_RESPONSE_MEDIATED_BY_ANTIMICROBIAL_PEPTIDE	GO_ANTIMICROBIAL_HUMORAL_IMMUNE_RESPONSE_MEDIATED_BY_ANTIMICROBIAL_PEPTIDE		21	0.517352	1.15948	0.371429	0.36202	1	5190	tags=29%, list=24%, signal=38%
GO_FOREBRAIN_DEVELOPMENT	GO_FOREBRAIN_DEVELOPMENT		333	0.291063	1.15919	0.0872211	0.362601	1	2386	tags=11%, list=11%, signal=13%
GO_NEUROTRANSMITTER_BIOSYNTHETIC_PROCESS	GO_NEUROTRANSMITTER_BIOSYNTHETIC_PROCESS		67	0.408828	1.15889	0	0.363018	1	1961	tags=18%, list=9%, signal=20%
GO_NEGATIVE_REGULATION_OF_ERK1_AND_ERK2_CASCADE	GO_NEGATIVE_REGULATION_OF_ERK1_AND_ERK2_CASCADE		61	0.371697	1.15883	0.227092	0.362991	1	3247	tags=18%, list=15%, signal=21%
GO_WNT_ACTIVATED_RECEPTOR_ACTIVITY	GO_WNT_ACTIVATED_RECEPTOR_ACTIVITY		16	0.451408	1.15875	0.296875	0.362924	1	4640	tags=44%, list=22%, signal=56%
GO_RESPONSE_TO_LEUKEMIA_INHIBITORY_FACTOR	GO_RESPONSE_TO_LEUKEMIA_INHIBITORY_FACTOR		90	0.345404	1.15808	0.203593	0.363933	1	3376	tags=17%, list=16%, signal=20%
GO_MICROVILLUS_MEMBRANE	GO_MICROVILLUS_MEMBRANE		18	0.482293	1.15782	0.282609	0.364359	1	1483	tags=22%, list=7%, signal=24%
GO_BONE_RESORPTION	GO_BONE_RESORPTION		45	0.335773	1.15776	0.0861057	0.364321	1	1980	tags=16%, list=9%, signal=17%
GO_POST_ANAL_TAIL_MORPHOGENESIS	GO_POST_ANAL_TAIL_MORPHOGENESIS		17	0.411579	1.15715	0.316	0.365063	1	2887	tags=24%, list=14%, signal=27%
GO_POTASSIUM_CHANNEL_COMPLEX	GO_POTASSIUM_CHANNEL_COMPLEX		82	0.391577	1.15711	0.108159	0.364985	1	2915	tags=32%, list=14%, signal=37%
GO_REGULATION_OF_CELL_SHAPE	GO_REGULATION_OF_CELL_SHAPE		129	0.274391	1.15692	0.202899	0.365046	1	1465	tags=7%, list=7%, signal=7%
GO_POSITIVE_REGULATION_OF_LYMPHOCYTE_MEDIATED_IMMUNITY	GO_POSITIVE_REGULATION_OF_LYMPHOCYTE_MEDIATED_IMMUNITY		70	0.362649	1.15682	0.177645	0.365098	1	3831	tags=23%, list=18%, signal=28%
GO_POSITIVE_REGULATION_OF_INTRINSIC_APOPTOTIC_SIGNALING_PATHWAY	GO_POSITIVE_REGULATION_OF_INTRINSIC_APOPTOTIC_SIGNALING_PATHWAY		47	0.369775	1.15543	0.31619	0.368398	1	7782	tags=47%, list=36%, signal=74%
GO_ION_CHANNEL_REGULATOR_ACTIVITY	GO_ION_CHANNEL_REGULATOR_ACTIVITY		88	0.367582	1.15519	0.086444	0.368839	1	703	tags=10%, list=3%, signal=11%
GO_NEGATIVE_REGULATION_OF_SMOOTHENED_SIGNALING_PATHWAY	GO_NEGATIVE_REGULATION_OF_SMOOTHENED_SIGNALING_PATHWAY		26	0.3704	1.15501	0.165984	0.369031	1	6006	tags=35%, list=28%, signal=48%
GO_MESODERMAL_CELL_FATE_COMMITMENT	GO_MESODERMAL_CELL_FATE_COMMITMENT		15	0.436553	1.15486	0.0910973	0.368892	1	25	tags=7%, list=0%, signal=7%
GO_REGULATION_OF_MONONUCLEAR_CELL_MIGRATION	GO_REGULATION_OF_MONONUCLEAR_CELL_MIGRATION		28	0.384367	1.15442	0.211429	0.369373	1	3288	tags=25%, list=15%, signal=30%
GO_POSITIVE_REGULATION_OF_INTERLEUKIN_8_PRODUCTION	GO_POSITIVE_REGULATION_OF_INTERLEUKIN_8_PRODUCTION		28	0.416106	1.15438	0.108055	0.369271	1	1617	tags=21%, list=8%, signal=23%
GO_CARDIAC_ATRIUM_DEVELOPMENT	GO_CARDIAC_ATRIUM_DEVELOPMENT		29	0.431578	1.15377	0	0.370274	1	635	tags=7%, list=3%, signal=7%
GO_GOLGI_LUMEN	GO_GOLGI_LUMEN		62	0.405925	1.15342	0.301587	0.370938	1	2653	tags=26%, list=12%, signal=29%
GO_POSITIVE_REGULATION_OF_CYCLASE_ACTIVITY	GO_POSITIVE_REGULATION_OF_CYCLASE_ACTIVITY		16	0.437233	1.15323	0.10387	0.371037	1	406	tags=13%, list=2%, signal=13%
GO_DNA_REPAIR_COMPLEX	GO_DNA_REPAIR_COMPLEX		39	0.317105	1.15317	0.117647	0.3709	1	8443	tags=51%, list=40%, signal=85%
GO_REGULATION_OF_NATURAL_KILLER_CELL_ACTIVATION	GO_REGULATION_OF_NATURAL_KILLER_CELL_ACTIVATION		22	0.427509	1.15312	0.221344	0.370883	1	1865	tags=23%, list=9%, signal=25%
GO_CATION_CHANNEL_ACTIVITY	GO_CATION_CHANNEL_ACTIVITY		237	0.341689	1.15268	0	0.371288	1	1961	tags=19%, list=9%, signal=21%
GO_ENSHEATHMENT_OF_NEURONS	GO_ENSHEATHMENT_OF_NEURONS		112	0.297834	1.15266	0.35625	0.371149	1	1342	tags=8%, list=6%, signal=9%
GO_NEGATIVE_REGULATION_OF_ORGANELLE_ORGANIZATION	GO_NEGATIVE_REGULATION_OF_ORGANELLE_ORGANIZATION		339	0.220047	1.15264	0.103586	0.371069	1	1934	tags=6%, list=9%, signal=7%
GO_RHO_GTPASE_BINDING	GO_RHO_GTPASE_BINDING		163	0.246026	1.15151	0.180162	0.373172	1	1729	tags=7%, list=8%, signal=8%
GO_PROTEIN_K63_LINKED_UBIQUITINATION	GO_PROTEIN_K63_LINKED_UBIQUITINATION		44	0.41582	1.15135	0.236328	0.373381	1	5421	tags=25%, list=25%, signal=33%
GO_ACUTE_INFLAMMATORY_RESPONSE	GO_ACUTE_INFLAMMATORY_RESPONSE		64	0.396177	1.15129	0.289683	0.373387	1	3831	tags=33%, list=18%, signal=40%
GO_MICROTUBULE	GO_MICROTUBULE		373	0.205219	1.15063	0.102616	0.374211	1	2272	tags=6%, list=11%, signal=7%
GO_CARBOHYDRATE_CATABOLIC_PROCESS	GO_CARBOHYDRATE_CATABOLIC_PROCESS		155	0.242633	1.15034	0.21611	0.374428	1	1394	tags=5%, list=7%, signal=5%
GO_REGULATION_OF_PROTEIN_POLYUBIQUITINATION	GO_REGULATION_OF_PROTEIN_POLYUBIQUITINATION		18	0.560532	1.15024	0.324219	0.374345	1	4432	tags=33%, list=21%, signal=42%
GO_CELLULAR_LIPID_CATABOLIC_PROCESS	GO_CELLULAR_LIPID_CATABOLIC_PROCESS		172	0.286746	1.15009	0.186192	0.374439	1	1983	tags=8%, list=9%, signal=8%
GO_SEMAPHORIN_RECEPTOR_BINDING	GO_SEMAPHORIN_RECEPTOR_BINDING		23	0.378335	1.14999	0.22093	0.374419	1	2119	tags=26%, list=10%, signal=29%
GO_RESPONSE_TO_HEPATOCYTE_GROWTH_FACTOR	GO_RESPONSE_TO_HEPATOCYTE_GROWTH_FACTOR		16	0.518845	1.14994	0.115234	0.374282	1	3027	tags=19%, list=14%, signal=22%
GO_PHOSPHOLIPID_BINDING	GO_PHOSPHOLIPID_BINDING		352	0.318116	1.14977	0.0761719	0.374502	1	3485	tags=18%, list=16%, signal=21%
GO_HOMOPHILIC_CELL_ADHESION_VIA_PLASMA_MEMBRANE_ADHESION_MOLECULES	GO_HOMOPHILIC_CELL_ADHESION_VIA_PLASMA_MEMBRANE_ADHESION_MOLECULES		115	0.359777	1.14969	0.215726	0.374523	1	2152	tags=19%, list=10%, signal=21%
GO_O_GLYCAN_PROCESSING	GO_O_GLYCAN_PROCESSING		43	0.480998	1.14947	0.121094	0.374621	1	4242	tags=40%, list=20%, signal=49%
GO_RESPONSE_TO_ACETYLCHOLINE	GO_RESPONSE_TO_ACETYLCHOLINE		23	0.488235	1.14927	0.212245	0.374734	1	2575	tags=26%, list=12%, signal=30%
GO_REGULATION_OF_MONOOXYGENASE_ACTIVITY	GO_REGULATION_OF_MONOOXYGENASE_ACTIVITY		46	0.366221	1.14893	0.294235	0.374974	1	204	tags=4%, list=1%, signal=4%
GO_OUTFLOW_TRACT_MORPHOGENESIS	GO_OUTFLOW_TRACT_MORPHOGENESIS		74	0.311589	1.14878	0.314629	0.375091	1	3030	tags=16%, list=14%, signal=19%
GO_PHOSPHATIDYLINOSITOL_METABOLIC_PROCESS	GO_PHOSPHATIDYLINOSITOL_METABOLIC_PROCESS		87	0.296008	1.14779	0.290722	0.37641	1	3975	tags=18%, list=19%, signal=23%
GO_REGULATION_OF_PEPTIDE_HORMONE_SECRETION	GO_REGULATION_OF_PEPTIDE_HORMONE_SECRETION		164	0.299555	1.14777	0.211813	0.376303	1	2396	tags=15%, list=11%, signal=17%
GO_OXIDOREDUCTASE_ACTIVITY_ACTING_ON_PAIRED_DONORS_WITH_INCORPORATION_OR_REDUCTION_OF_MOLECULAR_OXYGEN_NAD_P_H_AS_ONE_DONOR_AND_INCORPORATION_OF_ONE_ATOM_OF_OXYGEN	GO_OXIDOREDUCTASE_ACTIVITY_ACTING_ON_PAIRED_DONORS_WITH_INCORPORATION_OR_REDUCTION_OF_MOLECULAR_OXYGEN_NAD_P_H_AS_ONE_DONOR_AND_INCORPORATION_OF_ONE_ATOM_OF_OXYGEN		25	0.436768	1.14771	0.0847784	0.376192	1	878	tags=20%, list=4%, signal=21%
GO_ENDOCRINE_PROCESS	GO_ENDOCRINE_PROCESS		56	0.367587	1.1476	0.213333	0.376406	1	2572	tags=23%, list=12%, signal=26%
GO_RRNA_METABOLIC_PROCESS	GO_RRNA_METABOLIC_PROCESS		202	0.210634	1.14752	0.194444	0.376389	1	8637	tags=46%, list=40%, signal=76%
GO_INTERLEUKIN_1_PRODUCTION	GO_INTERLEUKIN_1_PRODUCTION		52	0.370627	1.14709	0.107004	0.376877	1	3328	tags=29%, list=16%, signal=34%
GO_POSITIVE_REGULATION_OF_SYNAPTIC_TRANSMISSION	GO_POSITIVE_REGULATION_OF_SYNAPTIC_TRANSMISSION		141	0.325092	1.14694	0	0.376938	1	1662	tags=18%, list=8%, signal=19%
GO_NEGATIVE_REGULATION_OF_SIGNAL_TRANSDUCTION_IN_ABSENCE_OF_LIGAND	GO_NEGATIVE_REGULATION_OF_SIGNAL_TRANSDUCTION_IN_ABSENCE_OF_LIGAND		27	0.427141	1.14692	0.175649	0.376906	1	142	tags=7%, list=1%, signal=7%
GO_MACROAUTOPHAGY	GO_MACROAUTOPHAGY		276	0.149158	1.14658	0.195609	0.37734	1	3392	tags=7%, list=16%, signal=8%
GO_NEGATIVE_REGULATION_OF_PRODUCTION_OF_MOLECULAR_MEDIATOR_OF_IMMUNE_RESPONSE	GO_NEGATIVE_REGULATION_OF_PRODUCTION_OF_MOLECULAR_MEDIATOR_OF_IMMUNE_RESPONSE		22	0.491045	1.14648	0.405714	0.377206	1	2778	tags=32%, list=13%, signal=37%
GO_OXIDOREDUCTASE_ACTIVITY_ACTING_ON_THE_CH_NH_GROUP_OF_DONORS_NAD_OR_NADP_AS_ACCEPTOR	GO_OXIDOREDUCTASE_ACTIVITY_ACTING_ON_THE_CH_NH_GROUP_OF_DONORS_NAD_OR_NADP_AS_ACCEPTOR		17	0.487003	1.14636	0.287968	0.377241	1	3844	tags=24%, list=18%, signal=29%
GO_INFLAMMATORY_CELL_APOPTOTIC_PROCESS	GO_INFLAMMATORY_CELL_APOPTOTIC_PROCESS		16	0.514226	1.14629	0.181641	0.37721	1	3025	tags=19%, list=14%, signal=22%
GO_TRANSMITTER_GATED_CHANNEL_ACTIVITY	GO_TRANSMITTER_GATED_CHANNEL_ACTIVITY		42	0.426748	1.14615	0	0.37744	1	1481	tags=21%, list=7%, signal=23%
GO_SEX_CHROMOSOME	GO_SEX_CHROMOSOME		26	0.376208	1.14567	0.187625	0.378117	1	5413	tags=15%, list=25%, signal=21%
GO_PODOSOME	GO_PODOSOME		27	0.406735	1.14558	0.396414	0.378132	1	1886	tags=11%, list=9%, signal=12%
GO_REGULATION_OF_GOLGI_ORGANIZATION	GO_REGULATION_OF_GOLGI_ORGANIZATION		15	0.339632	1.14553	0.0761719	0.378052	1	4349	tags=13%, list=20%, signal=17%
GO_PRIMARY_ACTIVE_TRANSMEMBRANE_TRANSPORTER_ACTIVITY	GO_PRIMARY_ACTIVE_TRANSMEMBRANE_TRANSPORTER_ACTIVITY		93	0.318125	1.14551	0.2158	0.377912	1	2449	tags=13%, list=11%, signal=15%
GO_POSITIVE_REGULATION_OF_SODIUM_ION_TRANSPORT	GO_POSITIVE_REGULATION_OF_SODIUM_ION_TRANSPORT		33	0.396251	1.1454	0.199226	0.377867	1	1497	tags=12%, list=7%, signal=13%
GO_REGULATION_OF_AXONOGENESIS	GO_REGULATION_OF_AXONOGENESIS		170	0.285422	1.14529	0.103586	0.37791	1	2753	tags=16%, list=13%, signal=18%
GO_VASCULAR_PROCESS_IN_CIRCULATORY_SYSTEM	GO_VASCULAR_PROCESS_IN_CIRCULATORY_SYSTEM		120	0.380518	1.14519	0	0.37795	1	2198	tags=22%, list=10%, signal=24%
GO_PHOSPHATIDYLINOSITOL_PHOSPHORYLATION	GO_PHOSPHATIDYLINOSITOL_PHOSPHORYLATION		48	0.353387	1.14514	0.473373	0.377847	1	3975	tags=21%, list=19%, signal=26%
GO_REPRODUCTIVE_SYSTEM_DEVELOPMENT	GO_REPRODUCTIVE_SYSTEM_DEVELOPMENT		370	0.248124	1.14507	0.0887097	0.377891	1	2858	tags=12%, list=13%, signal=13%
GO_NCRNA_TRANSCRIPTION	GO_NCRNA_TRANSCRIPTION		99	0.290099	1.14448	0	0.378597	1	9020	tags=51%, list=42%, signal=87%
GO_NEGATIVE_REGULATION_OF_MITOTIC_CELL_CYCLE	GO_NEGATIVE_REGULATION_OF_MITOTIC_CELL_CYCLE		289	0.192696	1.14413	0	0.378947	1	7779	tags=34%, list=36%, signal=52%
GO_STRUCTURAL_CONSTITUENT_OF_RIBOSOME	GO_STRUCTURAL_CONSTITUENT_OF_RIBOSOME		156	0.272802	1.14403	0.445525	0.379095	1	8054	tags=54%, list=38%, signal=87%
GO_NEGATIVE_REGULATION_OF_NUCLEAR_DIVISION	GO_NEGATIVE_REGULATION_OF_NUCLEAR_DIVISION		55	0.283181	1.14389	0.189024	0.379258	1	4851	tags=15%, list=23%, signal=19%
GO_REGULATION_OF_SYSTEMIC_ARTERIAL_BLOOD_PRESSURE	GO_REGULATION_OF_SYSTEMIC_ARTERIAL_BLOOD_PRESSURE		63	0.383699	1.14309	0.173996	0.380462	1	2135	tags=22%, list=10%, signal=25%
GO_NEGATIVE_REGULATION_OF_CARDIOCYTE_DIFFERENTIATION	GO_NEGATIVE_REGULATION_OF_CARDIOCYTE_DIFFERENTIATION		19	0.405445	1.14296	0.322449	0.380625	1	805	tags=11%, list=4%, signal=11%
GO_SPINDLE_ORGANIZATION	GO_SPINDLE_ORGANIZATION		156	0.167749	1.1424	0.292339	0.381393	1	5968	tags=15%, list=28%, signal=20%
GO_PERK_MEDIATED_UNFOLDED_PROTEIN_RESPONSE	GO_PERK_MEDIATED_UNFOLDED_PROTEIN_RESPONSE		18	0.492083	1.1424	0.158203	0.381221	1	2155	tags=11%, list=10%, signal=12%
GO_CATION_CHANNEL_COMPLEX	GO_CATION_CHANNEL_COMPLEX		174	0.344037	1.14235	0.0847784	0.381115	1	1412	tags=19%, list=7%, signal=20%
GO_MESODERMAL_CELL_DIFFERENTIATION	GO_MESODERMAL_CELL_DIFFERENTIATION		28	0.397257	1.1423	0.271222	0.380975	1	139	tags=7%, list=1%, signal=7%
GO_REGULATION_OF_EMBRYONIC_DEVELOPMENT	GO_REGULATION_OF_EMBRYONIC_DEVELOPMENT		115	0.295679	1.14225	0.0875764	0.380831	1	1918	tags=11%, list=9%, signal=12%
GO_ESTABLISHMENT_OF_PLANAR_POLARITY_INVOLVED_IN_NEURAL_TUBE_CLOSURE	GO_ESTABLISHMENT_OF_PLANAR_POLARITY_INVOLVED_IN_NEURAL_TUBE_CLOSURE		15	0.388119	1.14145	0.115234	0.382305	1	5025	tags=40%, list=24%, signal=52%
GO_POSITIVE_REGULATION_OF_MULTICELLULAR_ORGANISM_GROWTH	GO_POSITIVE_REGULATION_OF_MULTICELLULAR_ORGANISM_GROWTH		28	0.428993	1.14141	0.325714	0.382182	1	5458	tags=32%, list=26%, signal=43%
GO_GAMMA_TUBULIN_BINDING	GO_GAMMA_TUBULIN_BINDING		24	0.327213	1.14097	0.28125	0.383303	1	5843	tags=25%, list=27%, signal=34%
GO_NEGATIVE_REGULATION_OF_ERBB_SIGNALING_PATHWAY	GO_NEGATIVE_REGULATION_OF_ERBB_SIGNALING_PATHWAY		45	0.23442	1.14069	0.214583	0.383607	1	2155	tags=7%, list=10%, signal=7%
GO_REGULATION_OF_CD4_POSITIVE_ALPHA_BETA_T_CELL_ACTIVATION	GO_REGULATION_OF_CD4_POSITIVE_ALPHA_BETA_T_CELL_ACTIVATION		42	0.438989	1.1406	0.313576	0.383591	1	4319	tags=43%, list=20%, signal=54%
GO_INTERLEUKIN_1_MEDIATED_SIGNALING_PATHWAY	GO_INTERLEUKIN_1_MEDIATED_SIGNALING_PATHWAY		91	0.259899	1.14054	0.404762	0.383468	1	4091	tags=11%, list=19%, signal=14%
GO_BROWN_FAT_CELL_DIFFERENTIATION	GO_BROWN_FAT_CELL_DIFFERENTIATION		30	0.521103	1.1396	0	0.385068	1	1596	tags=20%, list=7%, signal=22%
GO_MICROVILLUS_ORGANIZATION	GO_MICROVILLUS_ORGANIZATION		21	0.451562	1.13953	0.279159	0.384967	1	3303	tags=19%, list=15%, signal=23%
GO_G_PROTEIN_COUPLED_RECEPTOR_ACTIVITY	GO_G_PROTEIN_COUPLED_RECEPTOR_ACTIVITY		243	0.36491	1.13919	0	0.385689	1	2795	tags=28%, list=13%, signal=31%
GO_INTERLEUKIN_6_SECRETION	GO_INTERLEUKIN_6_SECRETION		24	0.447782	1.13894	0.322957	0.385881	1	2712	tags=29%, list=13%, signal=33%
GO_DEAMINASE_ACTIVITY	GO_DEAMINASE_ACTIVITY		21	0.371221	1.13858	0.0854871	0.386391	1	656	tags=10%, list=3%, signal=10%
GO_RESPONSE_TO_MOLECULE_OF_BACTERIAL_ORIGIN	GO_RESPONSE_TO_MOLECULE_OF_BACTERIAL_ORIGIN		228	0.352513	1.13843	0.194286	0.386714	1	2904	tags=20%, list=14%, signal=23%
GO_REGULATION_OF_BIOMINERAL_TISSUE_DEVELOPMENT	GO_REGULATION_OF_BIOMINERAL_TISSUE_DEVELOPMENT		66	0.353252	1.13773	0.22179	0.388017	1	4430	tags=35%, list=21%, signal=44%
GO_NEGATIVE_REGULATION_OF_CARBOHYDRATE_METABOLIC_PROCESS	GO_NEGATIVE_REGULATION_OF_CARBOHYDRATE_METABOLIC_PROCESS		37	0.475382	1.13769	0.220238	0.387968	1	1817	tags=14%, list=9%, signal=15%
GO_POSITIVE_REGULATION_OF_NATURAL_KILLER_CELL_MEDIATED_IMMUNITY	GO_POSITIVE_REGULATION_OF_NATURAL_KILLER_CELL_MEDIATED_IMMUNITY		18	0.482661	1.13748	0.222222	0.388175	1	3572	tags=33%, list=17%, signal=40%
GO_REGULATION_OF_MUSCLE_CONTRACTION	GO_REGULATION_OF_MUSCLE_CONTRACTION		129	0.32933	1.13725	0.309339	0.388379	1	2795	tags=23%, list=13%, signal=27%
GO_REGULATION_OF_SENSORY_PERCEPTION	GO_REGULATION_OF_SENSORY_PERCEPTION		26	0.440138	1.13718	0.104938	0.388409	1	2140	tags=23%, list=10%, signal=26%
GO_REGULATION_OF_ENDOPLASMIC_RETICULUM_UNFOLDED_PROTEIN_RESPONSE	GO_REGULATION_OF_ENDOPLASMIC_RETICULUM_UNFOLDED_PROTEIN_RESPONSE		24	0.339141	1.13694	0.298828	0.388824	1	5700	tags=29%, list=27%, signal=40%
GO_VIRAL_GENE_EXPRESSION	GO_VIRAL_GENE_EXPRESSION		184	0.295472	1.13661	0.120623	0.389402	1	9529	tags=65%, list=45%, signal=116%
GO_CELLULAR_RESPONSE_TO_MECHANICAL_STIMULUS	GO_CELLULAR_RESPONSE_TO_MECHANICAL_STIMULUS		64	0.346972	1.13609	0.188825	0.390177	1	2572	tags=16%, list=12%, signal=18%
GO_PROTEIN_FOLDING_IN_ENDOPLASMIC_RETICULUM	GO_PROTEIN_FOLDING_IN_ENDOPLASMIC_RETICULUM		16	0.506983	1.13586	0.424762	0.390541	1	5514	tags=19%, list=26%, signal=25%
GO_APOPTOTIC_DNA_FRAGMENTATION	GO_APOPTOTIC_DNA_FRAGMENTATION		21	0.498313	1.13547	0.11753	0.391095	1	3871	tags=19%, list=18%, signal=23%
GO_RESPONSE_TO_CHEMOKINE	GO_RESPONSE_TO_CHEMOKINE		36	0.431117	1.13539	0.191398	0.391039	1	1893	tags=19%, list=9%, signal=21%
GO_DENDRITIC_SHAFT	GO_DENDRITIC_SHAFT		29	0.323334	1.13516	0.189135	0.391053	1	2727	tags=17%, list=13%, signal=20%
GO_NEGATIVE_REGULATION_OF_LEUKOCYTE_MEDIATED_IMMUNITY	GO_NEGATIVE_REGULATION_OF_LEUKOCYTE_MEDIATED_IMMUNITY		29	0.407568	1.13463	0.101562	0.391655	1	2778	tags=31%, list=13%, signal=36%
GO_CELLULAR_RESPONSE_TO_PEPTIDE	GO_CELLULAR_RESPONSE_TO_PEPTIDE		307	0.259336	1.13424	0.213333	0.392238	1	2817	tags=11%, list=13%, signal=12%
GO_NEGATIVE_REGULATION_OF_SODIUM_ION_TRANSPORT	GO_NEGATIVE_REGULATION_OF_SODIUM_ION_TRANSPORT		16	0.471777	1.13387	0.107422	0.392597	1	2594	tags=25%, list=12%, signal=28%
GO_SECRETION_BY_TISSUE	GO_SECRETION_BY_TISSUE		26	0.4065	1.13342	0.103586	0.393264	1	2135	tags=23%, list=10%, signal=26%
GO_T_CELL_DIFFERENTIATION_INVOLVED_IN_IMMUNE_RESPONSE	GO_T_CELL_DIFFERENTIATION_INVOLVED_IN_IMMUNE_RESPONSE		49	0.411249	1.13279	0.427083	0.394554	1	1572	tags=22%, list=7%, signal=24%
GO_DNA_DEPENDENT_ATPASE_ACTIVITY	GO_DNA_DEPENDENT_ATPASE_ACTIVITY		83	0.197347	1.13236	0.313576	0.395162	1	17144	tags=100%, list=80%, signal=507%
GO_PERIKARYON	GO_PERIKARYON		105	0.339229	1.13221	0.114341	0.395187	1	3008	tags=22%, list=14%, signal=25%
GO_FERROUS_IRON_BINDING	GO_FERROUS_IRON_BINDING		19	0.386282	1.13211	0.390963	0.395222	1	140	tags=5%, list=1%, signal=5%
GO_CARDIAC_MUSCLE_CELL_CONTRACTION	GO_CARDIAC_MUSCLE_CELL_CONTRACTION		60	0.346379	1.13202	0.301708	0.395208	1	1292	tags=15%, list=6%, signal=16%
GO_PROTEIN_DEMANNOSYLATION	GO_PROTEIN_DEMANNOSYLATION		19	0.292779	1.132	0.222656	0.395033	1	1939	tags=5%, list=9%, signal=6%
GO_LAMELLIPODIUM_MEMBRANE	GO_LAMELLIPODIUM_MEMBRANE		22	0.454529	1.13194	0.388145	0.394954	1	4362	tags=36%, list=20%, signal=46%
GO_IRON_ION_TRANSPORT	GO_IRON_ION_TRANSPORT		62	0.372396	1.13125	0.198444	0.396459	1	3392	tags=16%, list=16%, signal=19%
GO_REGULATION_OF_RESPONSE_TO_CYTOKINE_STIMULUS	GO_REGULATION_OF_RESPONSE_TO_CYTOKINE_STIMULUS		137	0.347917	1.13124	0.22	0.396312	1	2904	tags=17%, list=14%, signal=19%
GO_REGULATION_OF_CALCIUM_ION_TRANSMEMBRANE_TRANSPORT	GO_REGULATION_OF_CALCIUM_ION_TRANSMEMBRANE_TRANSPORT		106	0.314013	1.13089	0.199219	0.396767	1	2876	tags=20%, list=13%, signal=23%
GO_INTRINSIC_COMPONENT_OF_PRESYNAPTIC_MEMBRANE	GO_INTRINSIC_COMPONENT_OF_PRESYNAPTIC_MEMBRANE		65	0.358123	1.13084	0	0.396671	1	857	tags=15%, list=4%, signal=16%
GO_GTPASE_ACTIVITY	GO_GTPASE_ACTIVITY		265	0.251839	1.13013	0.0903226	0.397865	1	4656	tags=19%, list=22%, signal=24%
GO_HELICASE_ACTIVITY	GO_HELICASE_ACTIVITY		140	0.183236	1.13011	0.330677	0.397726	1	1006	tags=2%, list=5%, signal=2%
GO_COATED_VESICLE_MEMBRANE	GO_COATED_VESICLE_MEMBRANE		155	0.310594	1.12985	0.299807	0.397967	1	1477	tags=7%, list=7%, signal=8%
GO_INTRINSIC_COMPONENT_OF_SYNAPTIC_MEMBRANE	GO_INTRINSIC_COMPONENT_OF_SYNAPTIC_MEMBRANE		132	0.330303	1.12973	0	0.398008	1	2888	tags=27%, list=14%, signal=30%
GO_BRUSH_BORDER_MEMBRANE	GO_BRUSH_BORDER_MEMBRANE		36	0.372542	1.12938	0.105372	0.398501	1	1432	tags=19%, list=7%, signal=21%
GO_NEGATIVE_REGULATION_OF_STEROID_METABOLIC_PROCESS	GO_NEGATIVE_REGULATION_OF_STEROID_METABOLIC_PROCESS		21	0.483541	1.12932	0.213115	0.398355	1	895	tags=14%, list=4%, signal=15%
GO_TELOMERASE_RNA_LOCALIZATION	GO_TELOMERASE_RNA_LOCALIZATION		19	0.470133	1.12904	0	0.398682	1	8848	tags=58%, list=41%, signal=99%
GO_REGULATION_OF_RECEPTOR_LOCALIZATION_TO_SYNAPSE	GO_REGULATION_OF_RECEPTOR_LOCALIZATION_TO_SYNAPSE		15	0.32602	1.12875	0.486141	0.399183	1	973	tags=7%, list=5%, signal=7%
GO_CELLULAR_RESPONSE_TO_CADMIUM_ION	GO_CELLULAR_RESPONSE_TO_CADMIUM_ION		27	0.401196	1.12852	0.295539	0.399572	1	2599	tags=19%, list=12%, signal=21%
GO_PROTEIN_K48_LINKED_DEUBIQUITINATION	GO_PROTEIN_K48_LINKED_DEUBIQUITINATION		32	0.412757	1.12808	0.228	0.399918	1	6265	tags=34%, list=29%, signal=49%
GO_SOLUTE_PROTON_ANTIPORTER_ACTIVITY	GO_SOLUTE_PROTON_ANTIPORTER_ACTIVITY		18	0.471329	1.12806	0.335968	0.399823	1	2639	tags=28%, list=12%, signal=32%
GO_REGULATION_OF_CELL_JUNCTION_ASSEMBLY	GO_REGULATION_OF_CELL_JUNCTION_ASSEMBLY		79	0.299399	1.12794	0.189349	0.39978	1	3790	tags=18%, list=18%, signal=21%
GO_COTRANSLATIONAL_PROTEIN_TARGETING_TO_MEMBRANE	GO_COTRANSLATIONAL_PROTEIN_TARGETING_TO_MEMBRANE		100	0.367277	1.12792	0.28373	0.399604	1	9006	tags=69%, list=42%, signal=119%
GO_FILOPODIUM_MEMBRANE	GO_FILOPODIUM_MEMBRANE		17	0.377676	1.12776	0.203156	0.3997	1	135	tags=6%, list=1%, signal=6%
GO_POSITIVE_REGULATION_OF_VIRAL_TRANSCRIPTION	GO_POSITIVE_REGULATION_OF_VIRAL_TRANSCRIPTION		40	0.369437	1.12737	0.11753	0.400105	1	13470	tags=100%, list=63%, signal=271%
GO_AMIDE_BINDING	GO_AMIDE_BINDING		285	0.279355	1.1273	0	0.400018	1	1880	tags=9%, list=9%, signal=10%
GO_REGULATION_OF_REPRODUCTIVE_PROCESS	GO_REGULATION_OF_REPRODUCTIVE_PROCESS		111	0.339033	1.12695	0.186583	0.400406	1	2686	tags=18%, list=13%, signal=21%
GO_RNA_METHYLTRANSFERASE_ACTIVITY	GO_RNA_METHYLTRANSFERASE_ACTIVITY		62	0.2128	1.1263	0.47379	0.401337	1	7382	tags=31%, list=35%, signal=47%
GO_SENSORY_PERCEPTION	GO_SENSORY_PERCEPTION		375	0.322928	1.12581	0.114786	0.401996	1	2638	tags=21%, list=12%, signal=23%
[truncated: 1,046 more rows]

## Sheet: WiT49 parental vs 1G11 WT1KO
NAME	GS<br> follow link to MSigDB	GS DETAILS	SIZE	ES	NES	NOM p-val	FDR q-val	FWER p-val	RANK AT MAX	LEADING EDGE
GO_RESPONSE_TO_GAMMA_RADIATION	GO_RESPONSE_TO_GAMMA_RADIATION	Details ...	50	0.535349	2.64391	0	0.049	0	153	tags=4%, list=1%, signal=4%
GO_PROTEIN_LOCALIZATION_TO_ENDOSOME	GO_PROTEIN_LOCALIZATION_TO_ENDOSOME	Details ...	24	0.638869	2.37083	0	0.155294	0.095	17	tags=4%, list=0%, signal=4%
GO_MITOCHONDRION_MORPHOGENESIS	GO_MITOCHONDRION_MORPHOGENESIS	Details ...	20	0.633638	2.2815	0	0.213754	0.186	91	tags=5%, list=0%, signal=5%
GO_REGULATION_OF_MITOTIC_SPINDLE_ASSEMBLY	GO_REGULATION_OF_MITOTIC_SPINDLE_ASSEMBLY	Details ...	19	0.69258	2.2631	0	0.172566	0.186	99	tags=5%, list=0%, signal=5%
GO_MITOCHONDRIAL_FUSION	GO_MITOCHONDRIAL_FUSION	Details ...	21	0.685489	2.2282	0	0.147853	0.186	91	tags=5%, list=0%, signal=5%
GO_ESTABLISHMENT_OR_MAINTENANCE_OF_CYTOSKELETON_POLARITY	GO_ESTABLISHMENT_OR_MAINTENANCE_OF_CYTOSKELETON_POLARITY	Details ...	16	0.598914	2.22528	0	0.131377	0.186	11	tags=6%, list=0%, signal=6%
GO_OTHER_ORGANISM	GO_OTHER_ORGANISM	Details ...	65	0.518633	2.20904	0	0.119609	0.186	348	tags=3%, list=2%, signal=3%
GO_CELLULAR_RESPONSE_TO_GAMMA_RADIATION	GO_CELLULAR_RESPONSE_TO_GAMMA_RADIATION	Details ...	28	0.59177	2.19146	0	0.110783	0.186	80	tags=4%, list=0%, signal=4%
GO_GLYCOSYL_COMPOUND_METABOLIC_PROCESS	GO_GLYCOSYL_COMPOUND_METABOLIC_PROCESS	Details ...	54	0.535093	2.06164	0	0.160159	0.385	966	tags=9%, list=5%, signal=10%
GO_POSITIVE_REGULATION_OF_MICROTUBULE_POLYMERIZATION_OR_DEPOLYMERIZATION	GO_POSITIVE_REGULATION_OF_MICROTUBULE_POLYMERIZATION_OR_DEPOLYMERIZATION	Details ...	29	0.657733	2.02373	0	0.167699	0.465	99	tags=7%, list=0%, signal=7%
GO_OXIDOREDUCTASE_ACTIVITY_ACTING_ON_NAD_P_H	GO_OXIDOREDUCTASE_ACTIVITY_ACTING_ON_NAD_P_H	Details ...	88	0.555221	2.02227	0	0.156908	0.465	966	tags=9%, list=5%, signal=9%
GO_INCLUSION_BODY_ASSEMBLY	GO_INCLUSION_BODY_ASSEMBLY	Details ...	17	0.525184	1.99947	0	0.168727	0.512	99	tags=6%, list=0%, signal=6%
GO_PHOSPHATASE_ACTIVATOR_ACTIVITY	GO_PHOSPHATASE_ACTIVATOR_ACTIVITY	Details ...	16	0.618483	1.98726	0	0.166463	0.512	225	tags=6%, list=1%, signal=6%
GO_TRANSCRIPTION_ELONGATION_FACTOR_COMPLEX	GO_TRANSCRIPTION_ELONGATION_FACTOR_COMPLEX	Details ...	50	0.494752	1.95214	0	0.212151	0.561	1307	tags=4%, list=6%, signal=4%
GO_CYTOSOLIC_TRANSPORT	GO_CYTOSOLIC_TRANSPORT	Details ...	147	0.331331	1.93071	0	0.229935	0.616	1191	tags=3%, list=6%, signal=4%
GO_ENDOLYSOSOME	GO_ENDOLYSOSOME	Details ...	15	0.57744	1.9298	0	0.221948	0.616	298	tags=7%, list=1%, signal=7%
GO_NUCLEAR_HETEROCHROMATIN	GO_NUCLEAR_HETEROCHROMATIN	Details ...	33	0.417945	1.91324	0	0.221239	0.616	253	tags=3%, list=1%, signal=3%
GO_PROTEIN_DESTABILIZATION	GO_PROTEIN_DESTABILIZATION	Details ...	37	0.417218	1.90281	0	0.217575	0.616	225	tags=3%, list=1%, signal=3%
GO_REGULATION_OF_CELLULAR_RESPONSE_TO_HEAT	GO_REGULATION_OF_CELLULAR_RESPONSE_TO_HEAT	Details ...	78	0.387496	1.87267	0	0.236998	0.66	752	tags=4%, list=4%, signal=4%
GO_VESICLE_MEDIATED_TRANSPORT_BETWEEN_ENDOSOMAL_COMPARTMENTS	GO_VESICLE_MEDIATED_TRANSPORT_BETWEEN_ENDOSOMAL_COMPARTMENTS	Details ...	41	0.50519	1.86309	0	0.235036	0.66	17	tags=2%, list=0%, signal=2%
GO_REGULATION_OF_EARLY_ENDOSOME_TO_LATE_ENDOSOME_TRANSPORT	GO_REGULATION_OF_EARLY_ENDOSOME_TO_LATE_ENDOSOME_TRANSPORT		17	0.796361	1.85619	0	0.242989	0.66	17	tags=6%, list=0%, signal=6%
GO_DOUBLE_STRANDED_RNA_BINDING	GO_DOUBLE_STRANDED_RNA_BINDING		66	0.364801	1.85027	0	0.234171	0.66	17	tags=2%, list=0%, signal=2%
GO_GLUCURONOSYLTRANSFERASE_ACTIVITY	GO_GLUCURONOSYLTRANSFERASE_ACTIVITY		15	0.837454	1.84375	0	0.230031	0.714	145	tags=27%, list=1%, signal=27%
GO_PHOSPHATASE_INHIBITOR_ACTIVITY	GO_PHOSPHATASE_INHIBITOR_ACTIVITY		36	0.484167	1.84099	0	0.222488	0.714	344	tags=11%, list=2%, signal=11%
GO_CLATHRIN_COAT	GO_CLATHRIN_COAT		44	0.479374	1.83385	0	0.223342	0.753	1	tags=2%, list=0%, signal=2%
GO_PHOSPHATASE_REGULATOR_ACTIVITY	GO_PHOSPHATASE_REGULATOR_ACTIVITY		86	0.382191	1.83076	0	0.216637	0.753	1077	tags=8%, list=5%, signal=9%
GO_POSITIVE_REGULATION_OF_CELLULAR_PROTEIN_CATABOLIC_PROCESS	GO_POSITIVE_REGULATION_OF_CELLULAR_PROTEIN_CATABOLIC_PROCESS		126	0.434999	1.82052	0	0.222839	0.753	907	tags=6%, list=4%, signal=6%
GO_REGULATION_OF_CYTOPLASMIC_TRANSPORT	GO_REGULATION_OF_CYTOPLASMIC_TRANSPORT		22	0.63848	1.81624	0	0.222035	0.753	771	tags=9%, list=4%, signal=9%
GO_BASAL_PART_OF_CELL	GO_BASAL_PART_OF_CELL		40	0.692965	1.81321	0	0.222603	0.753	200	tags=13%, list=1%, signal=13%
GO_POSITIVE_REGULATION_OF_POSTTRANSCRIPTIONAL_GENE_SILENCING	GO_POSITIVE_REGULATION_OF_POSTTRANSCRIPTIONAL_GENE_SILENCING		24	0.504482	1.80568	0	0.223183	0.753	175	tags=4%, list=1%, signal=4%
GO_AZOLE_TRANSPORT	GO_AZOLE_TRANSPORT		19	0.621667	1.80281	0	0.220788	0.753	1690	tags=21%, list=8%, signal=23%
GO_EXTRACELLULAR_VESICLE_BIOGENESIS	GO_EXTRACELLULAR_VESICLE_BIOGENESIS		20	0.740055	1.79587	0	0.228543	0.753	1558	tags=10%, list=7%, signal=11%
GO_REGULATION_OF_GENE_EXPRESSION_EPIGENETIC	GO_REGULATION_OF_GENE_EXPRESSION_EPIGENETIC		315	0.244879	1.78786	0	0.227818	0.753	1410	tags=3%, list=7%, signal=4%
GO_CELL_AGING	GO_CELL_AGING		96	0.39571	1.77139	0	0.239651	0.823	965	tags=5%, list=5%, signal=5%
GO_MIDDLE_EAR_MORPHOGENESIS	GO_MIDDLE_EAR_MORPHOGENESIS		20	0.716228	1.76855	0	0.239434	0.823	350	tags=20%, list=2%, signal=20%
GO_REGULATION_OF_MICROTUBULE_POLYMERIZATION	GO_REGULATION_OF_MICROTUBULE_POLYMERIZATION		42	0.57693	1.75918	0	0.237882	0.823	771	tags=7%, list=4%, signal=7%
GO_REGULATION_OF_RESPONSE_TO_OXIDATIVE_STRESS	GO_REGULATION_OF_RESPONSE_TO_OXIDATIVE_STRESS		71	0.450418	1.75823	0	0.232778	0.823	1039	tags=8%, list=5%, signal=9%
GO_CELLULAR_RESPONSE_TO_COPPER_ION	GO_CELLULAR_RESPONSE_TO_COPPER_ION		18	0.662601	1.75751	0	0.23076	0.823	210	tags=17%, list=1%, signal=17%
GO_NEGATIVE_REGULATION_OF_DNA_BINDING	GO_NEGATIVE_REGULATION_OF_DNA_BINDING		49	0.389742	1.75716	0	0.2261	0.823	2898	tags=12%, list=14%, signal=14%
GO_MICROTUBULE_NUCLEATION	GO_MICROTUBULE_NUCLEATION		25	0.510125	1.75365	0	0.229075	0.823	99	tags=4%, list=0%, signal=4%
GO_REGULATION_OF_DNA_BIOSYNTHETIC_PROCESS	GO_REGULATION_OF_DNA_BIOSYNTHETIC_PROCESS		97	0.394908	1.75117	0	0.226213	0.823	1677	tags=8%, list=8%, signal=9%
GO_RESPONSE_TO_TESTOSTERONE	GO_RESPONSE_TO_TESTOSTERONE		38	0.604467	1.74948	0	0.221994	0.823	21	tags=8%, list=0%, signal=8%
GO_MICROTUBULE_PLUS_END_BINDING	GO_MICROTUBULE_PLUS_END_BINDING		17	0.70085	1.7477	0	0.22243	0.823	77	tags=6%, list=0%, signal=6%
GO_PURINE_NUCLEOSIDE_MONOPHOSPHATE_METABOLIC_PROCESS	GO_PURINE_NUCLEOSIDE_MONOPHOSPHATE_METABOLIC_PROCESS		21	0.479822	1.74447	0	0.22076	0.823	2	tags=5%, list=0%, signal=5%
GO_VASCULOGENESIS	GO_VASCULOGENESIS		64	0.464387	1.7433	0	0.216943	0.823	766	tags=11%, list=4%, signal=11%
GO_PHOSPHOLIPID_TRANSLOCATING_ATPASE_ACTIVITY	GO_PHOSPHOLIPID_TRANSLOCATING_ATPASE_ACTIVITY		19	0.624481	1.73994	0	0.216348	0.823	101	tags=11%, list=0%, signal=11%
GO_HISTONE_DEACETYLASE_BINDING	GO_HISTONE_DEACETYLASE_BINDING		101	0.355353	1.73722	0	0.216067	0.823	3017	tags=11%, list=14%, signal=13%
GO_ATP_BIOSYNTHETIC_PROCESS	GO_ATP_BIOSYNTHETIC_PROCESS		23	0.514641	1.7343	0	0.216836	0.823	91	tags=4%, list=0%, signal=4%
GO_TORC1_SIGNALING	GO_TORC1_SIGNALING		35	0.576648	1.73174	0	0.214948	0.823	699	tags=6%, list=3%, signal=6%
GO_AGGRESOME	GO_AGGRESOME		37	0.598881	1.73073	0	0.212919	0.823	1217	tags=11%, list=6%, signal=11%
GO_REGULATION_OF_ACTOMYOSIN_STRUCTURE_ORGANIZATION	GO_REGULATION_OF_ACTOMYOSIN_STRUCTURE_ORGANIZATION		78	0.464446	1.73008	0	0.209705	0.823	517	tags=8%, list=2%, signal=8%
GO_RESPONSE_TO_SALT	GO_RESPONSE_TO_SALT		17	0.698975	1.72814	0	0.20958	0.823	143	tags=18%, list=1%, signal=18%
GO_CELL_CYCLE_G2_M_PHASE_TRANSITION	GO_CELL_CYCLE_G2_M_PHASE_TRANSITION		255	0.238564	1.7221	0	0.211287	0.823	829	tags=2%, list=4%, signal=2%
GO_CARBOHYDRATE_KINASE_ACTIVITY	GO_CARBOHYDRATE_KINASE_ACTIVITY		20	0.47222	1.71822	0	0.213556	0.823	29	tags=5%, list=0%, signal=5%
GO_MICROTUBULE_END	GO_MICROTUBULE_END		27	0.430683	1.71813	0	0.210564	0.823	77	tags=4%, list=0%, signal=4%
GO_CHROMATIN_ORGANIZATION_INVOLVED_IN_REGULATION_OF_TRANSCRIPTION	GO_CHROMATIN_ORGANIZATION_INVOLVED_IN_REGULATION_OF_TRANSCRIPTION		109	0.318556	1.71719	0	0.211672	0.823	1410	tags=5%, list=7%, signal=5%
GO_CHONDROITIN_SULFATE_PROTEOGLYCAN_BIOSYNTHETIC_PROCESS	GO_CHONDROITIN_SULFATE_PROTEOGLYCAN_BIOSYNTHETIC_PROCESS		31	0.582721	1.71219	0	0.21515	0.823	925	tags=19%, list=4%, signal=20%
GO_POSITIVE_REGULATION_OF_PROTEIN_DEPOLYMERIZATION	GO_POSITIVE_REGULATION_OF_PROTEIN_DEPOLYMERIZATION		18	0.708703	1.7114	0	0.213227	0.823	1116	tags=22%, list=5%, signal=23%
GO_POSITIVE_REGULATION_OF_MITOTIC_NUCLEAR_DIVISION	GO_POSITIVE_REGULATION_OF_MITOTIC_NUCLEAR_DIVISION		45	0.501948	1.70247	0	0.222007	0.823	1079	tags=7%, list=5%, signal=7%
GO_FICOLIN_1_RICH_GRANULE	GO_FICOLIN_1_RICH_GRANULE		110	0.403687	1.69867	0	0.222133	0.823	1594	tags=5%, list=7%, signal=6%
GO_NUCLEOTIDE_SUGAR_METABOLIC_PROCESS	GO_NUCLEOTIDE_SUGAR_METABOLIC_PROCESS		16	0.555637	1.69834	0	0.220166	0.823	145	tags=6%, list=1%, signal=6%
GO_REGULATION_OF_GENE_SILENCING	GO_REGULATION_OF_GENE_SILENCING		137	0.289329	1.69643	0	0.220909	0.823	965	tags=3%, list=5%, signal=3%
GO_FAD_BINDING	GO_FAD_BINDING		25	0.521611	1.69498	0	0.218855	0.823	47	tags=8%, list=0%, signal=8%
GO_MICROTUBULE_PLUS_END	GO_MICROTUBULE_PLUS_END		20	0.469751	1.69426	0	0.21724	0.823	77	tags=5%, list=0%, signal=5%
GO_POSITIVE_REGULATION_OF_MACROAUTOPHAGY	GO_POSITIVE_REGULATION_OF_MACROAUTOPHAGY		62	0.366356	1.69381	0	0.214652	0.823	2336	tags=8%, list=11%, signal=9%
GO_TOR_SIGNALING	GO_TOR_SIGNALING		105	0.36389	1.69355	0	0.212142	0.823	699	tags=4%, list=3%, signal=4%
GO_CARBOHYDRATE_PHOSPHORYLATION	GO_CARBOHYDRATE_PHOSPHORYLATION		23	0.440158	1.69079	0	0.21576	0.823	29	tags=4%, list=0%, signal=4%
GO_GUANOSINE_CONTAINING_COMPOUND_METABOLIC_PROCESS	GO_GUANOSINE_CONTAINING_COMPOUND_METABOLIC_PROCESS		24	0.47645	1.68993	0	0.214089	0.823	2	tags=4%, list=0%, signal=4%
GO_REGULATION_OF_SPINDLE_ORGANIZATION	GO_REGULATION_OF_SPINDLE_ORGANIZATION		40	0.469768	1.68809	0	0.211696	0.823	99	tags=3%, list=0%, signal=3%
GO_RESPONSE_TO_LEPTIN	GO_RESPONSE_TO_LEPTIN		18	0.605083	1.68792	0	0.209372	0.823	91	tags=11%, list=0%, signal=11%
GO_RESPONSE_TO_MUSCLE_STRETCH	GO_RESPONSE_TO_MUSCLE_STRETCH		16	0.723504	1.68782	0	0.207113	0.823	691	tags=13%, list=3%, signal=13%
GO_PROTEIN_PHOSPHATASE_BINDING	GO_PROTEIN_PHOSPHATASE_BINDING		125	0.289144	1.68675	0	0.20685	0.823	1594	tags=6%, list=7%, signal=7%
GO_TERTIARY_GRANULE	GO_TERTIARY_GRANULE		116	0.462726	1.68622	0	0.205865	0.823	1561	tags=12%, list=7%, signal=13%
GO_CELLULAR_RESPONSE_TO_OXYGEN_LEVELS	GO_CELLULAR_RESPONSE_TO_OXYGEN_LEVELS		208	0.35344	1.67565	0	0.212155	0.893	965	tags=5%, list=5%, signal=5%
GO_DECIDUALIZATION	GO_DECIDUALIZATION		19	0.578514	1.67341	0	0.212671	0.893	149	tags=11%, list=1%, signal=11%
GO_PEROXISOMAL_MEMBRANE_TRANSPORT	GO_PEROXISOMAL_MEMBRANE_TRANSPORT		18	0.539551	1.67218	0	0.211795	0.893	308	tags=6%, list=1%, signal=6%
GO_CELLULAR_ALDEHYDE_METABOLIC_PROCESS	GO_CELLULAR_ALDEHYDE_METABOLIC_PROCESS		35	0.655585	1.67139	0	0.210798	0.893	966	tags=20%, list=5%, signal=21%
GO_EMBRYONIC_HINDLIMB_MORPHOGENESIS	GO_EMBRYONIC_HINDLIMB_MORPHOGENESIS		28	0.51508	1.66989	0	0.210199	0.893	1720	tags=21%, list=8%, signal=23%
GO_POSITIVE_REGULATION_OF_TOR_SIGNALING	GO_POSITIVE_REGULATION_OF_TOR_SIGNALING		34	0.429585	1.66952	0	0.209301	0.893	494	tags=6%, list=2%, signal=6%
GO_FATTY_ACID_BETA_OXIDATION_USING_ACYL_COA_OXIDASE	GO_FATTY_ACID_BETA_OXIDATION_USING_ACYL_COA_OXIDASE		15	0.704747	1.66627	0	0.211223	0.893	47	tags=7%, list=0%, signal=7%
GO_REGULATION_OF_SPINDLE_ASSEMBLY	GO_REGULATION_OF_SPINDLE_ASSEMBLY		26	0.606853	1.66239	0	0.215519	0.893	99	tags=4%, list=0%, signal=4%
GO_PROTEIN_TRIMERIZATION	GO_PROTEIN_TRIMERIZATION		41	0.498128	1.65985	0	0.217423	0.893	521	tags=12%, list=2%, signal=12%
GO_BICARBONATE_TRANSPORT	GO_BICARBONATE_TRANSPORT		28	0.608808	1.65959	0	0.216051	0.893	1638	tags=32%, list=8%, signal=35%
GO_NEGATIVE_REGULATION_OF_RESPONSE_TO_WOUNDING	GO_NEGATIVE_REGULATION_OF_RESPONSE_TO_WOUNDING		63	0.57776	1.65446	0	0.219895	0.893	1398	tags=21%, list=7%, signal=22%
GO_MATERNAL_PLACENTA_DEVELOPMENT	GO_MATERNAL_PLACENTA_DEVELOPMENT		29	0.513129	1.65442	0	0.217884	0.893	149	tags=7%, list=1%, signal=7%
GO_POSITIVE_REGULATION_OF_SODIUM_ION_TRANSMEMBRANE_TRANSPORTER_ACTIVITY	GO_POSITIVE_REGULATION_OF_SODIUM_ION_TRANSMEMBRANE_TRANSPORTER_ACTIVITY		16	0.598419	1.653	0	0.216958	0.893	549	tags=13%, list=3%, signal=13%
GO_RESPONSE_TO_INTERLEUKIN_12	GO_RESPONSE_TO_INTERLEUKIN_12		43	0.520406	1.65293	0	0.215028	0.893	762	tags=9%, list=4%, signal=10%
GO_REGULATION_OF_ODONTOGENESIS	GO_REGULATION_OF_ODONTOGENESIS		21	0.583523	1.65048	0	0.216205	0.893	351	tags=24%, list=2%, signal=24%
GO_REGULATION_OF_CLATHRIN_DEPENDENT_ENDOCYTOSIS	GO_REGULATION_OF_CLATHRIN_DEPENDENT_ENDOCYTOSIS		16	0.574876	1.6451	0	0.224741	0.953	364	tags=13%, list=2%, signal=13%
GO_STEROL_BIOSYNTHETIC_PROCESS	GO_STEROL_BIOSYNTHETIC_PROCESS		66	0.335782	1.64274	0	0.226241	0.953	859	tags=5%, list=4%, signal=5%
GO_REGULATION_OF_RESPONSE_TO_DNA_DAMAGE_STIMULUS	GO_REGULATION_OF_RESPONSE_TO_DNA_DAMAGE_STIMULUS		195	0.294275	1.64069	0	0.225355	0.953	3121	tags=10%, list=15%, signal=12%
GO_EPIBOLY	GO_EPIBOLY		28	0.571641	1.63961	0	0.224266	0.953	55	tags=7%, list=0%, signal=7%
GO_MORPHOGENESIS_OF_AN_EPITHELIAL_SHEET	GO_MORPHOGENESIS_OF_AN_EPITHELIAL_SHEET		51	0.618768	1.63885	0	0.223972	0.953	3201	tags=25%, list=15%, signal=30%
GO_NEGATIVE_REGULATION_OF_TRANSCRIPTION_REGULATORY_REGION_DNA_BINDING	GO_NEGATIVE_REGULATION_OF_TRANSCRIPTION_REGULATORY_REGION_DNA_BINDING		18	0.550414	1.63805	0	0.223539	0.953	18	tags=6%, list=0%, signal=6%
GO_MIRNA_BINDING	GO_MIRNA_BINDING		26	0.647824	1.63757	0	0.221702	0.953	654	tags=8%, list=3%, signal=8%
GO_REGULATION_OF_TELOMERE_MAINTENANCE	GO_REGULATION_OF_TELOMERE_MAINTENANCE		74	0.349353	1.63327	0.101365	0.224568	0.953	226	tags=3%, list=1%, signal=3%
GO_RECEPTOR_RECYCLING	GO_RECEPTOR_RECYCLING		29	0.562148	1.63306	0	0.222758	0.953	608	tags=7%, list=3%, signal=7%
GO_RESPONSE_TO_COPPER_ION	GO_RESPONSE_TO_COPPER_ION		28	0.609292	1.63234	0	0.222503	0.953	210	tags=11%, list=1%, signal=11%
GO_REGULATION_OF_CELLULAR_PROTEIN_CATABOLIC_PROCESS	GO_REGULATION_OF_CELLULAR_PROTEIN_CATABOLIC_PROCESS		225	0.3219	1.63224	0	0.221287	0.953	1138	tags=4%, list=5%, signal=4%
GO_POSITIVE_REGULATION_OF_PROTEIN_COMPLEX_DISASSEMBLY	GO_POSITIVE_REGULATION_OF_PROTEIN_COMPLEX_DISASSEMBLY		33	0.660194	1.63179	0	0.219564	0.953	1116	tags=15%, list=5%, signal=16%
GO_POSITIVE_REGULATION_OF_CYTOKINE_BIOSYNTHETIC_PROCESS	GO_POSITIVE_REGULATION_OF_CYTOKINE_BIOSYNTHETIC_PROCESS		38	0.557622	1.62578	0	0.229779	1	1019	tags=16%, list=5%, signal=17%
GO_CELLULAR_RESPONSE_TO_OXIDATIVE_STRESS	GO_CELLULAR_RESPONSE_TO_OXIDATIVE_STRESS		251	0.388306	1.62208	0	0.234455	1	1438	tags=9%, list=7%, signal=9%
GO_REGULATION_OF_PROTEIN_DEPHOSPHORYLATION	GO_REGULATION_OF_PROTEIN_DEPHOSPHORYLATION		118	0.287911	1.62147	0	0.233686	1	1077	tags=6%, list=5%, signal=6%
GO_ANTIBIOTIC_METABOLIC_PROCESS	GO_ANTIBIOTIC_METABOLIC_PROCESS		61	0.492242	1.61816	0	0.233795	1	966	tags=15%, list=5%, signal=15%
GO_CHONDROITIN_SULFATE_BIOSYNTHETIC_PROCESS	GO_CHONDROITIN_SULFATE_BIOSYNTHETIC_PROCESS		26	0.575106	1.61658	0	0.234368	1	925	tags=19%, list=4%, signal=20%
GO_NEGATIVE_REGULATION_OF_GENE_EXPRESSION_EPIGENETIC	GO_NEGATIVE_REGULATION_OF_GENE_EXPRESSION_EPIGENETIC		116	0.320409	1.61527	0	0.236338	1	1410	tags=4%, list=7%, signal=5%
GO_REGULATION_OF_PROTON_TRANSPORT	GO_REGULATION_OF_PROTON_TRANSPORT		15	0.726362	1.61523	0	0.234587	1	549	tags=13%, list=3%, signal=14%
GO_REGULATORY_RNA_BINDING	GO_REGULATORY_RNA_BINDING		31	0.611262	1.61371	0	0.233271	1	654	tags=6%, list=3%, signal=7%
GO_MICROTUBULE_POLYMERIZATION	GO_MICROTUBULE_POLYMERIZATION		65	0.452625	1.61125	0	0.236008	1	771	tags=5%, list=4%, signal=5%
GO_REGULATION_OF_ERYTHROCYTE_DIFFERENTIATION	GO_REGULATION_OF_ERYTHROCYTE_DIFFERENTIATION		39	0.586237	1.61106	0	0.234308	1	685	tags=10%, list=3%, signal=11%
GO_PLACENTA_DEVELOPMENT	GO_PLACENTA_DEVELOPMENT		132	0.457441	1.60651	0	0.239204	1	2215	tags=17%, list=10%, signal=18%
GO_EXTRINSIC_APOPTOTIC_SIGNALING_PATHWAY_VIA_DEATH_DOMAIN_RECEPTORS	GO_EXTRINSIC_APOPTOTIC_SIGNALING_PATHWAY_VIA_DEATH_DOMAIN_RECEPTORS		74	0.46379	1.60641	0	0.237506	1	4106	tags=26%, list=19%, signal=32%
GO_REGULATION_OF_MEGAKARYOCYTE_DIFFERENTIATION	GO_REGULATION_OF_MEGAKARYOCYTE_DIFFERENTIATION		75	0.370097	1.60577	0	0.235838	1	1191	tags=7%, list=6%, signal=7%
GO_TERTIARY_GRANULE_MEMBRANE	GO_TERTIARY_GRANULE_MEMBRANE		52	0.556334	1.60309	0	0.238428	1	1561	tags=17%, list=7%, signal=19%
GO_ACTIVATION_OF_JUN_KINASE_ACTIVITY	GO_ACTIVATION_OF_JUN_KINASE_ACTIVITY		36	0.419355	1.60075	0	0.239456	1	303	tags=6%, list=1%, signal=6%
GO_POSITIVE_REGULATION_OF_NUCLEAR_DIVISION	GO_POSITIVE_REGULATION_OF_NUCLEAR_DIVISION		55	0.436425	1.59687	0	0.242744	1	1079	tags=7%, list=5%, signal=8%
GO_REGULATION_OF_COLLATERAL_SPROUTING	GO_REGULATION_OF_COLLATERAL_SPROUTING		18	0.463346	1.59487	0	0.244404	1	121	tags=11%, list=1%, signal=11%
GO_GLANDULAR_EPITHELIAL_CELL_DIFFERENTIATION	GO_GLANDULAR_EPITHELIAL_CELL_DIFFERENTIATION		40	0.503991	1.59402	0	0.243211	1	1383	tags=15%, list=6%, signal=16%
GO_NEGATIVE_REGULATION_OF_MUSCLE_CELL_APOPTOTIC_PROCESS	GO_NEGATIVE_REGULATION_OF_MUSCLE_CELL_APOPTOTIC_PROCESS		29	0.551313	1.59055	0	0.247646	1	571	tags=7%, list=3%, signal=7%
GO_REGULATION_OF_GLUCOSE_TRANSMEMBRANE_TRANSPORT	GO_REGULATION_OF_GLUCOSE_TRANSMEMBRANE_TRANSPORT		62	0.468717	1.58837	0	0.252237	1	965	tags=10%, list=5%, signal=10%
GO_PROTEIN_N_LINKED_GLYCOSYLATION	GO_PROTEIN_N_LINKED_GLYCOSYLATION		73	0.247822	1.58718	0	0.251659	1	1066	tags=4%, list=5%, signal=4%
GO_NUCLEOSIDE_MONOPHOSPHATE_KINASE_ACTIVITY	GO_NUCLEOSIDE_MONOPHOSPHATE_KINASE_ACTIVITY		22	0.494233	1.58682	0	0.250867	1	404	tags=9%, list=2%, signal=9%
GO_RESPONSE_TO_ANTINEOPLASTIC_AGENT	GO_RESPONSE_TO_ANTINEOPLASTIC_AGENT		81	0.512885	1.58681	0.0922787	0.249226	1	2041	tags=12%, list=10%, signal=14%
GO_BASAL_PLASMA_MEMBRANE	GO_BASAL_PLASMA_MEMBRANE		26	0.658901	1.58675	0	0.247612	1	92	tags=12%, list=0%, signal=12%
GO_POSITIVE_REGULATION_OF_OXIDOREDUCTASE_ACTIVITY	GO_POSITIVE_REGULATION_OF_OXIDOREDUCTASE_ACTIVITY		45	0.564525	1.58662	0	0.24685	1	2137	tags=18%, list=10%, signal=20%
GO_FIBROBLAST_PROLIFERATION	GO_FIBROBLAST_PROLIFERATION		73	0.412383	1.58547	0	0.246199	1	1290	tags=10%, list=6%, signal=10%
GO_POSITIVE_REGULATION_OF_CELLULAR_RESPONSE_TO_TRANSFORMING_GROWTH_FACTOR_BETA_STIMULUS	GO_POSITIVE_REGULATION_OF_CELLULAR_RESPONSE_TO_TRANSFORMING_GROWTH_FACTOR_BETA_STIMULUS		27	0.601349	1.58543	0	0.244646	1	4036	tags=33%, list=19%, signal=41%
GO_CELLULAR_RESPONSE_TO_CORTICOSTEROID_STIMULUS	GO_CELLULAR_RESPONSE_TO_CORTICOSTEROID_STIMULUS		53	0.471881	1.58487	0	0.243118	1	4106	tags=30%, list=19%, signal=37%
GO_CELLULAR_SENESCENCE	GO_CELLULAR_SENESCENCE		61	0.437401	1.58446	0	0.241613	1	1621	tags=8%, list=8%, signal=9%
GO_HETEROTYPIC_CELL_CELL_ADHESION	GO_HETEROTYPIC_CELL_CELL_ADHESION		43	0.543283	1.58362	0	0.241724	1	1287	tags=14%, list=6%, signal=15%
GO_POSITIVE_REGULATION_OF_PROTEIN_CATABOLIC_PROCESS	GO_POSITIVE_REGULATION_OF_PROTEIN_CATABOLIC_PROCESS		191	0.330352	1.58316	0	0.240908	1	907	tags=5%, list=4%, signal=5%
GO_REGULATION_OF_NUCLEAR_DIVISION	GO_REGULATION_OF_NUCLEAR_DIVISION		186	0.276814	1.58307	0	0.239455	1	268	tags=2%, list=1%, signal=2%
GO_POSITIVE_REGULATION_OF_JNK_CASCADE	GO_POSITIVE_REGULATION_OF_JNK_CASCADE		110	0.430527	1.58224	0	0.239266	1	1258	tags=10%, list=6%, signal=11%
GO_POSITIVE_REGULATION_OF_DNA_BIOSYNTHETIC_PROCESS	GO_POSITIVE_REGULATION_OF_DNA_BIOSYNTHETIC_PROCESS		64	0.519846	1.5821	0	0.237846	1	1677	tags=11%, list=8%, signal=12%
GO_POSITIVE_REGULATION_OF_STRESS_ACTIVATED_PROTEIN_KINASE_SIGNALING_CASCADE	GO_POSITIVE_REGULATION_OF_STRESS_ACTIVATED_PROTEIN_KINASE_SIGNALING_CASCADE		133	0.45832	1.582	0	0.236841	1	1258	tags=11%, list=6%, signal=11%
GO_ACTOMYOSIN_STRUCTURE_ORGANIZATION	GO_ACTOMYOSIN_STRUCTURE_ORGANIZATION		160	0.380019	1.58193	0	0.235837	1	1550	tags=11%, list=7%, signal=11%
GO_POSITIVE_REGULATION_OF_SODIUM_ION_TRANSMEMBRANE_TRANSPORT	GO_POSITIVE_REGULATION_OF_SODIUM_ION_TRANSMEMBRANE_TRANSPORT		20	0.522854	1.57885	0	0.237805	1	549	tags=15%, list=3%, signal=15%
GO_LAMELLIPODIUM	GO_LAMELLIPODIUM		177	0.368814	1.57571	0	0.241203	1	676	tags=6%, list=3%, signal=6%
GO_REGULATION_OF_CELL_SIZE	GO_REGULATION_OF_CELL_SIZE		165	0.418222	1.57514	0	0.24019	1	2026	tags=13%, list=9%, signal=14%
GO_NEGATIVE_REGULATION_OF_RESPONSE_TO_DNA_DAMAGE_STIMULUS	GO_NEGATIVE_REGULATION_OF_RESPONSE_TO_DNA_DAMAGE_STIMULUS		70	0.40441	1.57221	0.0936903	0.241912	1	2536	tags=10%, list=12%, signal=11%
GO_REGULATION_OF_BINDING	GO_REGULATION_OF_BINDING		332	0.350917	1.56887	0	0.243723	1	3377	tags=14%, list=16%, signal=17%
GO_PRODUCTION_OF_SMALL_RNA_INVOLVED_IN_GENE_SILENCING_BY_RNA	GO_PRODUCTION_OF_SMALL_RNA_INVOLVED_IN_GENE_SILENCING_BY_RNA		49	0.448258	1.56884	0	0.242352	1	5073	tags=20%, list=24%, signal=27%
GO_REGULATION_OF_EXECUTION_PHASE_OF_APOPTOSIS	GO_REGULATION_OF_EXECUTION_PHASE_OF_APOPTOSIS		25	0.593776	1.56729	0	0.2438	1	739	tags=12%, list=3%, signal=12%
GO_OXIDOREDUCTASE_ACTIVITY_ACTING_ON_NAD_P_H_QUINONE_OR_SIMILAR_COMPOUND_AS_ACCEPTOR	GO_OXIDOREDUCTASE_ACTIVITY_ACTING_ON_NAD_P_H_QUINONE_OR_SIMILAR_COMPOUND_AS_ACCEPTOR		50	0.494912	1.56727	0	0.242447	1	966	tags=6%, list=5%, signal=6%
GO_SMOOTH_MUSCLE_CELL_DIFFERENTIATION	GO_SMOOTH_MUSCLE_CELL_DIFFERENTIATION		53	0.492677	1.56643	0	0.241891	1	3238	tags=26%, list=15%, signal=31%
GO_CHONDROITIN_SULFATE_PROTEOGLYCAN_METABOLIC_PROCESS	GO_CHONDROITIN_SULFATE_PROTEOGLYCAN_METABOLIC_PROCESS		37	0.54408	1.56635	0	0.24057	1	925	tags=19%, list=4%, signal=20%
GO_CARBOHYDRATE_TRANSMEMBRANE_TRANSPORT	GO_CARBOHYDRATE_TRANSMEMBRANE_TRANSPORT		90	0.447808	1.56626	0	0.239267	1	1765	tags=13%, list=8%, signal=14%
GO_REGULATION_OF_STRESS_ACTIVATED_PROTEIN_KINASE_SIGNALING_CASCADE	GO_REGULATION_OF_STRESS_ACTIVATED_PROTEIN_KINASE_SIGNALING_CASCADE		188	0.428742	1.56591	0	0.23834	1	1258	tags=10%, list=6%, signal=11%
GO_MESENCHYME_MORPHOGENESIS	GO_MESENCHYME_MORPHOGENESIS		48	0.560968	1.56568	0	0.237069	1	1570	tags=21%, list=7%, signal=22%
GO_BONE_MATURATION	GO_BONE_MATURATION		17	0.621908	1.56504	0	0.236564	1	225	tags=12%, list=1%, signal=12%
GO_POSITIVE_REGULATION_OF_CYTOSOLIC_CALCIUM_ION_CONCENTRATION_INVOLVED_IN_PHOSPHOLIPASE_C_ACTIVATING_G_PROTEIN_COUPLED_SIGNALING_PATHWAY	GO_POSITIVE_REGULATION_OF_CYTOSOLIC_CALCIUM_ION_CONCENTRATION_INVOLVED_IN_PHOSPHOLIPASE_C_ACTIVATING_G_PROTEIN_COUPLED_SIGNALING_PATHWAY		16	0.615275	1.56489	0	0.235321	1	744	tags=25%, list=3%, signal=26%
GO_HEART_TRABECULA_MORPHOGENESIS	GO_HEART_TRABECULA_MORPHOGENESIS		30	0.51308	1.56486	0	0.234096	1	852	tags=13%, list=4%, signal=14%
GO_REGULATION_OF_RECEPTOR_BIOSYNTHETIC_PROCESS	GO_REGULATION_OF_RECEPTOR_BIOSYNTHETIC_PROCESS		18	0.60512	1.56394	0	0.234169	1	685	tags=11%, list=3%, signal=11%
GO_CONTRACTILE_ACTIN_FILAMENT_BUNDLE_ASSEMBLY	GO_CONTRACTILE_ACTIN_FILAMENT_BUNDLE_ASSEMBLY		84	0.438706	1.56365	0	0.232967	1	517	tags=7%, list=2%, signal=7%
GO_PROTEIN_HOMOTRIMERIZATION	GO_PROTEIN_HOMOTRIMERIZATION		23	0.47051	1.56352	0	0.23178	1	521	tags=13%, list=2%, signal=13%
GO_REGULATION_OF_DNA_BINDING	GO_REGULATION_OF_DNA_BINDING		114	0.337964	1.56141	0	0.232129	1	2421	tags=10%, list=11%, signal=11%
GO_CELL_SUBSTRATE_JUNCTION	GO_CELL_SUBSTRATE_JUNCTION		384	0.353629	1.56093	0	0.231615	1	3267	tags=13%, list=15%, signal=15%
GO_REGULATION_OF_MICROTUBULE_POLYMERIZATION_OR_DEPOLYMERIZATION	GO_REGULATION_OF_MICROTUBULE_POLYMERIZATION_OR_DEPOLYMERIZATION		69	0.479656	1.56073	0	0.231098	1	1302	tags=7%, list=6%, signal=8%
GO_ODONTOGENESIS	GO_ODONTOGENESIS		111	0.475078	1.55944	0	0.231266	1	2044	tags=21%, list=10%, signal=23%
GO_DNA_METHYLATION	GO_DNA_METHYLATION		49	0.493636	1.5593	0	0.230531	1	597	tags=6%, list=3%, signal=6%
GO_CELLULAR_RESPONSE_TO_ORGANIC_CYCLIC_COMPOUND	GO_CELLULAR_RESPONSE_TO_ORGANIC_CYCLIC_COMPOUND		457	0.335782	1.55881	0	0.229403	1	1320	tags=8%, list=6%, signal=9%
GO_CELL_VOLUME_HOMEOSTASIS	GO_CELL_VOLUME_HOMEOSTASIS		27	0.647089	1.55844	0	0.228557	1	811	tags=11%, list=4%, signal=12%
GO_FRIZZLED_BINDING	GO_FRIZZLED_BINDING		36	0.554273	1.55807	0	0.227455	1	386	tags=19%, list=2%, signal=20%
GO_POSITIVE_REGULATION_OF_SIGNALING_RECEPTOR_ACTIVITY	GO_POSITIVE_REGULATION_OF_SIGNALING_RECEPTOR_ACTIVITY		32	0.552269	1.55726	0	0.22696	1	1079	tags=19%, list=5%, signal=20%
GO_POSITIVE_REGULATION_OF_STEM_CELL_DIFFERENTIATION	GO_POSITIVE_REGULATION_OF_STEM_CELL_DIFFERENTIATION		17	0.734335	1.55713	0	0.226207	1	852	tags=24%, list=4%, signal=24%
GO_PROTEIN_TRANSMEMBRANE_TRANSPORT	GO_PROTEIN_TRANSMEMBRANE_TRANSPORT		59	0.459123	1.55658	0	0.22546	1	1246	tags=7%, list=6%, signal=7%
GO_ALDO_KETO_REDUCTASE_NADP_ACTIVITY	GO_ALDO_KETO_REDUCTASE_NADP_ACTIVITY		18	0.783334	1.55552	0	0.225846	1	966	tags=28%, list=5%, signal=29%
GO_POSITIVE_REGULATION_OF_VASCULAR_SMOOTH_MUSCLE_CELL_PROLIFERATION	GO_POSITIVE_REGULATION_OF_VASCULAR_SMOOTH_MUSCLE_CELL_PROLIFERATION		28	0.539378	1.55517	0	0.225046	1	1893	tags=18%, list=9%, signal=20%
GO_PERICENTRIC_HETEROCHROMATIN	GO_PERICENTRIC_HETEROCHROMATIN		20	0.638229	1.55511	0	0.224281	1	2164	tags=15%, list=10%, signal=17%
GO_REGULATION_OF_PROTEIN_BINDING	GO_REGULATION_OF_PROTEIN_BINDING		193	0.349955	1.55286	0	0.226144	1	1446	tags=8%, list=7%, signal=8%
GO_REGULATION_OF_NUCLEOTIDE_BIOSYNTHETIC_PROCESS	GO_REGULATION_OF_NUCLEOTIDE_BIOSYNTHETIC_PROCESS		28	0.534609	1.55254	0	0.225589	1	1211	tags=14%, list=6%, signal=15%
GO_REGULATION_OF_INSULIN_LIKE_GROWTH_FACTOR_RECEPTOR_SIGNALING_PATHWAY	GO_REGULATION_OF_INSULIN_LIKE_GROWTH_FACTOR_RECEPTOR_SIGNALING_PATHWAY		16	0.624396	1.54783	0	0.230438	1	1465	tags=25%, list=7%, signal=27%
GO_INTRACELLULAR_PROTEIN_TRANSMEMBRANE_TRANSPORT	GO_INTRACELLULAR_PROTEIN_TRANSMEMBRANE_TRANSPORT		51	0.48663	1.54743	0	0.229987	1	1246	tags=8%, list=6%, signal=8%
GO_NEGATIVE_REGULATION_OF_BINDING	GO_NEGATIVE_REGULATION_OF_BINDING		140	0.359874	1.54728	0	0.228947	1	1446	tags=8%, list=7%, signal=8%
GO_REGULATION_OF_PRODUCTION_OF_SMALL_RNA_INVOLVED_IN_GENE_SILENCING_BY_RNA	GO_REGULATION_OF_PRODUCTION_OF_SMALL_RNA_INVOLVED_IN_GENE_SILENCING_BY_RNA		20	0.598231	1.54703	0	0.228223	1	965	tags=10%, list=5%, signal=10%
GO_SELECTIVE_AUTOPHAGY	GO_SELECTIVE_AUTOPHAGY		45	0.419987	1.54672	0	0.227753	1	1811	tags=7%, list=8%, signal=7%
GO_GENE_SILENCING_BY_RNA	GO_GENE_SILENCING_BY_RNA		180	0.287355	1.54514	0	0.229119	1	965	tags=3%, list=5%, signal=3%
GO_REGULATION_OF_ORGANELLE_ASSEMBLY	GO_REGULATION_OF_ORGANELLE_ASSEMBLY		171	0.32493	1.54455	0	0.229225	1	1622	tags=6%, list=8%, signal=6%
GO_REGULATION_OF_POSTTRANSCRIPTIONAL_GENE_SILENCING	GO_REGULATION_OF_POSTTRANSCRIPTIONAL_GENE_SILENCING		109	0.274263	1.5435	0	0.230772	1	965	tags=3%, list=5%, signal=3%
GO_PROTEIN_C_TERMINUS_BINDING	GO_PROTEIN_C_TERMINUS_BINDING		177	0.247014	1.54343	0	0.229762	1	965	tags=4%, list=5%, signal=4%
GO_APICAL_DENDRITE	GO_APICAL_DENDRITE		15	0.595099	1.54333	0	0.228764	1	771	tags=13%, list=4%, signal=14%
GO_STRESS_ACTIVATED_PROTEIN_KINASE_SIGNALING_CASCADE	GO_STRESS_ACTIVATED_PROTEIN_KINASE_SIGNALING_CASCADE		259	0.341885	1.54257	0	0.228929	1	1258	tags=8%, list=6%, signal=8%
GO_MYELOID_LEUKOCYTE_ACTIVATION	GO_MYELOID_LEUKOCYTE_ACTIVATION		475	0.342152	1.54132	0	0.230672	1	1597	tags=8%, list=7%, signal=9%
GO_REGULATION_OF_NUCLEOBASE_CONTAINING_COMPOUND_METABOLIC_PROCESS	GO_REGULATION_OF_NUCLEOBASE_CONTAINING_COMPOUND_METABOLIC_PROCESS		454	0.223156	1.54112	0	0.230262	1	965	tags=3%, list=5%, signal=3%
GO_FEAR_RESPONSE	GO_FEAR_RESPONSE		33	0.513732	1.54004	0	0.231572	1	1046	tags=21%, list=5%, signal=22%
GO_NEGATIVE_REGULATION_OF_BIOMINERAL_TISSUE_DEVELOPMENT	GO_NEGATIVE_REGULATION_OF_BIOMINERAL_TISSUE_DEVELOPMENT		16	0.646771	1.54001	0	0.230876	1	304	tags=13%, list=1%, signal=13%
GO_CARBOHYDRATE_TRANSPORT	GO_CARBOHYDRATE_TRANSPORT		117	0.437137	1.53963	0	0.231306	1	1467	tags=10%, list=7%, signal=11%
GO_REGULATION_OF_T_CELL_MEDIATED_CYTOTOXICITY	GO_REGULATION_OF_T_CELL_MEDIATED_CYTOTOXICITY		19	0.637119	1.53775	0	0.231836	1	762	tags=16%, list=4%, signal=16%
GO_RESPONSE_TO_OXIDATIVE_STRESS	GO_RESPONSE_TO_OXIDATIVE_STRESS		371	0.344252	1.53704	0	0.23145	1	2107	tags=9%, list=10%, signal=10%
GO_INSULIN_LIKE_GROWTH_FACTOR_RECEPTOR_SIGNALING_PATHWAY	GO_INSULIN_LIKE_GROWTH_FACTOR_RECEPTOR_SIGNALING_PATHWAY		29	0.536502	1.53693	0	0.230777	1	2599	tags=21%, list=12%, signal=24%
GO_REGULATION_OF_HEART_GROWTH	GO_REGULATION_OF_HEART_GROWTH		59	0.46763	1.53688	0	0.229825	1	1440	tags=12%, list=7%, signal=13%
GO_MITOCHONDRIAL_FISSION	GO_MITOCHONDRIAL_FISSION		31	0.423034	1.53552	0	0.232325	1	341	tags=6%, list=2%, signal=7%
GO_GLANDULAR_EPITHELIAL_CELL_DEVELOPMENT	GO_GLANDULAR_EPITHELIAL_CELL_DEVELOPMENT		23	0.465065	1.53547	0	0.231375	1	4079	tags=30%, list=19%, signal=38%
GO_REGULATION_OF_T_CELL_RECEPTOR_SIGNALING_PATHWAY	GO_REGULATION_OF_T_CELL_RECEPTOR_SIGNALING_PATHWAY		26	0.567673	1.53489	0	0.231393	1	4023	tags=27%, list=19%, signal=33%
GO_SEX_DETERMINATION	GO_SEX_DETERMINATION		17	0.595947	1.53442	0	0.231174	1	1399	tags=24%, list=7%, signal=25%
GO_ATRIOVENTRICULAR_VALVE_DEVELOPMENT	GO_ATRIOVENTRICULAR_VALVE_DEVELOPMENT		22	0.621155	1.53408	0	0.230574	1	852	tags=18%, list=4%, signal=19%
GO_POSITIVE_REGULATION_OF_ORGANELLE_ASSEMBLY	GO_POSITIVE_REGULATION_OF_ORGANELLE_ASSEMBLY		61	0.43086	1.53368	0	0.230183	1	17	tags=3%, list=0%, signal=3%
GO_POSITIVE_REGULATION_OF_HEART_GROWTH	GO_POSITIVE_REGULATION_OF_HEART_GROWTH		36	0.544161	1.53349	0	0.230283	1	541	tags=11%, list=3%, signal=11%
GO_POSITIVE_REGULATION_OF_CARDIAC_MUSCLE_CELL_PROLIFERATION	GO_POSITIVE_REGULATION_OF_CARDIAC_MUSCLE_CELL_PROLIFERATION		24	0.575055	1.5332	0	0.229896	1	3399	tags=29%, list=16%, signal=35%
GO_SH3_DOMAIN_BINDING	GO_SH3_DOMAIN_BINDING		116	0.441744	1.53303	0	0.22926	1	671	tags=8%, list=3%, signal=8%
GO_MEGAKARYOCYTE_DIFFERENTIATION	GO_MEGAKARYOCYTE_DIFFERENTIATION		91	0.384671	1.53139	0	0.229797	1	2789	tags=12%, list=13%, signal=14%
GO_SULFUR_AMINO_ACID_METABOLIC_PROCESS	GO_SULFUR_AMINO_ACID_METABOLIC_PROCESS		15	0.740347	1.53074	0	0.230436	1	311	tags=13%, list=1%, signal=14%
GO_POSITIVE_REGULATION_OF_AUTOPHAGY	GO_POSITIVE_REGULATION_OF_AUTOPHAGY		106	0.348828	1.53058	0	0.229542	1	4666	tags=23%, list=22%, signal=29%
GO_GLYCOPROTEIN_METABOLIC_PROCESS	GO_GLYCOPROTEIN_METABOLIC_PROCESS		120	0.480561	1.52993	0	0.22945	1	2253	tags=18%, list=11%, signal=20%
GO_PEPTIDE_CROSS_LINKING	GO_PEPTIDE_CROSS_LINKING		19	0.655527	1.52947	0	0.229122	1	2107	tags=37%, list=10%, signal=41%
GO_POSITIVE_REGULATION_OF_WNT_SIGNALING_PATHWAY	GO_POSITIVE_REGULATION_OF_WNT_SIGNALING_PATHWAY		165	0.457055	1.52929	0	0.228248	1	1399	tags=11%, list=7%, signal=12%
GO_RESPONSE_TO_DEXAMETHASONE	GO_RESPONSE_TO_DEXAMETHASONE		34	0.659226	1.52853	0	0.228018	1	2039	tags=21%, list=10%, signal=23%
GO_ENDOPLASMIC_RETICULUM_LUMEN	GO_ENDOPLASMIC_RETICULUM_LUMEN		254	0.385895	1.52716	0	0.230732	1	1443	tags=11%, list=7%, signal=12%
GO_CELL_SURFACE_RECEPTOR_SIGNALING_PATHWAY_INVOLVED_IN_HEART_DEVELOPMENT	GO_CELL_SURFACE_RECEPTOR_SIGNALING_PATHWAY_INVOLVED_IN_HEART_DEVELOPMENT		25	0.531728	1.52653	0	0.230353	1	225	tags=12%, list=1%, signal=12%
GO_TRANSLATION_INITIATION_FACTOR_BINDING	GO_TRANSLATION_INITIATION_FACTOR_BINDING		30	0.565618	1.52625	0	0.229696	1	175	tags=7%, list=1%, signal=7%
GO_CELLULAR_RESPONSE_TO_ACID_CHEMICAL	GO_CELLULAR_RESPONSE_TO_ACID_CHEMICAL		176	0.438316	1.52463	0	0.230912	1	1296	tags=14%, list=6%, signal=15%
GO_WOUND_HEALING	GO_WOUND_HEALING		424	0.390093	1.52389	0	0.230773	1	1570	tags=12%, list=7%, signal=13%
GO_REGULATION_OF_DNA_METHYLATION	GO_REGULATION_OF_DNA_METHYLATION		16	0.799384	1.5224	0	0.232687	1	426	tags=13%, list=2%, signal=13%
GO_REGULATION_OF_RECEPTOR_BINDING	GO_REGULATION_OF_RECEPTOR_BINDING		20	0.685853	1.52193	0	0.232575	1	608	tags=20%, list=3%, signal=21%
GO_CLATHRIN_COATED_PIT	GO_CLATHRIN_COATED_PIT		64	0.380868	1.52075	0	0.233878	1	1925	tags=11%, list=9%, signal=12%
GO_METHYL_CPG_BINDING	GO_METHYL_CPG_BINDING		20	0.499615	1.52049	0	0.233243	1	513	tags=5%, list=2%, signal=5%
GO_RECEPTOR_BIOSYNTHETIC_PROCESS	GO_RECEPTOR_BIOSYNTHETIC_PROCESS		19	0.583545	1.52017	0	0.232936	1	685	tags=11%, list=3%, signal=11%
GO_MODIFICATION_OF_MORPHOLOGY_OR_PHYSIOLOGY_OF_OTHER_ORGANISM_INVOLVED_IN_SYMBIOTIC_INTERACTION	GO_MODIFICATION_OF_MORPHOLOGY_OR_PHYSIOLOGY_OF_OTHER_ORGANISM_INVOLVED_IN_SYMBIOTIC_INTERACTION		87	0.386058	1.51939	0	0.233688	1	608	tags=5%, list=3%, signal=5%
GO_HMG_BOX_DOMAIN_BINDING	GO_HMG_BOX_DOMAIN_BINDING		16	0.672448	1.51939	0	0.232845	1	589	tags=31%, list=3%, signal=32%
GO_REGULATION_OF_HETEROTYPIC_CELL_CELL_ADHESION	GO_REGULATION_OF_HETEROTYPIC_CELL_CELL_ADHESION		15	0.705934	1.51926	0	0.232009	1	1204	tags=20%, list=6%, signal=21%
GO_KETONE_BIOSYNTHETIC_PROCESS	GO_KETONE_BIOSYNTHETIC_PROCESS		35	0.57097	1.51812	0	0.232228	1	2044	tags=17%, list=10%, signal=19%
GO_CARDIAC_EPITHELIAL_TO_MESENCHYMAL_TRANSITION	GO_CARDIAC_EPITHELIAL_TO_MESENCHYMAL_TRANSITION		30	0.573242	1.51776	0	0.231686	1	1092	tags=20%, list=5%, signal=21%
GO_REGULATION_OF_DEPHOSPHORYLATION	GO_REGULATION_OF_DEPHOSPHORYLATION		176	0.264031	1.51704	0	0.232105	1	1165	tags=6%, list=5%, signal=7%
GO_POSITIVE_REGULATION_OF_REACTIVE_OXYGEN_SPECIES_METABOLIC_PROCESS	GO_POSITIVE_REGULATION_OF_REACTIVE_OXYGEN_SPECIES_METABOLIC_PROCESS		34	0.48973	1.51502	0	0.234664	1	2051	tags=18%, list=10%, signal=19%
GO_POSITIVE_REGULATION_OF_CANONICAL_WNT_SIGNALING_PATHWAY	GO_POSITIVE_REGULATION_OF_CANONICAL_WNT_SIGNALING_PATHWAY		134	0.435015	1.51492	0	0.233839	1	1399	tags=9%, list=7%, signal=10%
GO_LAMELLIPODIUM_MORPHOGENESIS	GO_LAMELLIPODIUM_MORPHOGENESIS		17	0.696113	1.51469	0	0.233021	1	285	tags=12%, list=1%, signal=12%
GO_POSITIVE_REGULATION_OF_JUN_KINASE_ACTIVITY	GO_POSITIVE_REGULATION_OF_JUN_KINASE_ACTIVITY		64	0.41628	1.51451	0	0.232484	1	882	tags=8%, list=4%, signal=8%
GO_POSITIVE_REGULATION_OF_FIBROBLAST_PROLIFERATION	GO_POSITIVE_REGULATION_OF_FIBROBLAST_PROLIFERATION		45	0.479103	1.51282	0	0.233568	1	1893	tags=13%, list=9%, signal=15%
GO_HEMATOPOIETIC_STEM_CELL_PROLIFERATION	GO_HEMATOPOIETIC_STEM_CELL_PROLIFERATION		20	0.494532	1.5119	0	0.23445	1	386	tags=15%, list=2%, signal=15%
GO_CELLULAR_RESPONSE_TO_STARVATION	GO_CELLULAR_RESPONSE_TO_STARVATION		134	0.301312	1.51177	0	0.234052	1	2002	tags=7%, list=9%, signal=8%
GO_NEGATIVE_REGULATION_OF_CELL_CYCLE_G1_S_PHASE_TRANSITION	GO_NEGATIVE_REGULATION_OF_CELL_CYCLE_G1_S_PHASE_TRANSITION		98	0.346213	1.51133	0	0.233623	1	2619	tags=10%, list=12%, signal=12%
GO_LEUKOCYTE_MEDIATED_CYTOTOXICITY	GO_LEUKOCYTE_MEDIATED_CYTOTOXICITY		60	0.472883	1.51051	0	0.234896	1	3906	tags=27%, list=18%, signal=33%
GO_NUCLEOSIDE_MONOPHOSPHATE_METABOLIC_PROCESS	GO_NUCLEOSIDE_MONOPHOSPHATE_METABOLIC_PROCESS		31	0.412279	1.51047	0	0.234098	1	404	tags=6%, list=2%, signal=7%
GO_PROTEIN_TRANSMEMBRANE_IMPORT_INTO_INTRACELLULAR_ORGANELLE	GO_PROTEIN_TRANSMEMBRANE_IMPORT_INTO_INTRACELLULAR_ORGANELLE		33	0.602312	1.5104	0	0.233307	1	1246	tags=12%, list=6%, signal=13%
GO_REGULATION_OF_INTRINSIC_APOPTOTIC_SIGNALING_PATHWAY_IN_RESPONSE_TO_DNA_DAMAGE	GO_REGULATION_OF_INTRINSIC_APOPTOTIC_SIGNALING_PATHWAY_IN_RESPONSE_TO_DNA_DAMAGE		36	0.496812	1.50998	0.10325	0.233239	1	2536	tags=17%, list=12%, signal=19%
GO_RECEPTOR_METABOLIC_PROCESS	GO_RECEPTOR_METABOLIC_PROCESS		156	0.382873	1.50949	0	0.232945	1	767	tags=10%, list=4%, signal=10%
GO_POSITIVE_REGULATION_OF_NIK_NF_KAPPAB_SIGNALING	GO_POSITIVE_REGULATION_OF_NIK_NF_KAPPAB_SIGNALING		60	0.488561	1.50869	0	0.233008	1	1597	tags=15%, list=7%, signal=16%
GO_TRACHEA_DEVELOPMENT	GO_TRACHEA_DEVELOPMENT		19	0.766366	1.50625	0	0.236052	1	685	tags=21%, list=3%, signal=22%
GO_POSITIVE_REGULATION_OF_EPITHELIAL_CELL_PROLIFERATION	GO_POSITIVE_REGULATION_OF_EPITHELIAL_CELL_PROLIFERATION		154	0.441146	1.50556	0	0.236185	1	1710	tags=16%, list=8%, signal=18%
GO_SIGNAL_TRANSDUCTION_IN_RESPONSE_TO_DNA_DAMAGE	GO_SIGNAL_TRANSDUCTION_IN_RESPONSE_TO_DNA_DAMAGE		120	0.362482	1.5042	0	0.236444	1	3604	tags=13%, list=17%, signal=15%
GO_REGULATION_OF_NEURON_PROJECTION_REGENERATION	GO_REGULATION_OF_NEURON_PROJECTION_REGENERATION		26	0.519869	1.50415	0	0.235666	1	1204	tags=15%, list=6%, signal=16%
GO_ALCOHOL_DEHYDROGENASE_NADPPLUS_ACTIVITY	GO_ALCOHOL_DEHYDROGENASE_NADPPLUS_ACTIVITY		15	0.792448	1.50395	0	0.235353	1	966	tags=33%, list=5%, signal=35%
GO_CELL_REDOX_HOMEOSTASIS	GO_CELL_REDOX_HOMEOSTASIS		66	0.365151	1.50162	0	0.238232	1	1251	tags=6%, list=6%, signal=6%
GO_REGULATION_OF_PROTEIN_STABILITY	GO_REGULATION_OF_PROTEIN_STABILITY		245	0.22998	1.50006	0	0.240422	1	1857	tags=5%, list=9%, signal=5%
GO_REGULATION_OF_EXTRINSIC_APOPTOTIC_SIGNALING_PATHWAY_VIA_DEATH_DOMAIN_RECEPTORS	GO_REGULATION_OF_EXTRINSIC_APOPTOTIC_SIGNALING_PATHWAY_VIA_DEATH_DOMAIN_RECEPTORS		51	0.479834	1.49958	0	0.239818	1	3845	tags=29%, list=18%, signal=36%
GO_NEGATIVE_REGULATION_OF_COLD_INDUCED_THERMOGENESIS	GO_NEGATIVE_REGULATION_OF_COLD_INDUCED_THERMOGENESIS		44	0.513693	1.49885	0	0.240122	1	1183	tags=16%, list=6%, signal=17%
GO_REGULATION_OF_CYTOSKELETON_ORGANIZATION	GO_REGULATION_OF_CYTOSKELETON_ORGANIZATION		468	0.286218	1.49846	0	0.240334	1	1446	tags=6%, list=7%, signal=6%
GO_INOSITOL_PHOSPHATE_MEDIATED_SIGNALING	GO_INOSITOL_PHOSPHATE_MEDIATED_SIGNALING		46	0.405602	1.49773	0	0.241703	1	1083	tags=9%, list=5%, signal=9%
GO_RENAL_SYSTEM_PROCESS	GO_RENAL_SYSTEM_PROCESS		87	0.547722	1.49673	0	0.242669	1	2169	tags=23%, list=10%, signal=25%
GO_NEGATIVE_REGULATION_OF_COAGULATION	GO_NEGATIVE_REGULATION_OF_COAGULATION		37	0.631234	1.49623	0	0.242918	1	2210	tags=35%, list=10%, signal=39%
GO_REGULATION_OF_TELOMERASE_ACTIVITY	GO_REGULATION_OF_TELOMERASE_ACTIVITY		46	0.416297	1.49598	0	0.242527	1	1677	tags=9%, list=8%, signal=9%
GO_OXIDOREDUCTASE_ACTIVITY_ACTING_ON_THE_CH_CH_GROUP_OF_DONORS_NAD_OR_NADP_AS_ACCEPTOR	GO_OXIDOREDUCTASE_ACTIVITY_ACTING_ON_THE_CH_CH_GROUP_OF_DONORS_NAD_OR_NADP_AS_ACCEPTOR		24	0.602957	1.49567	0	0.242008	1	966	tags=13%, list=5%, signal=13%
GO_REGULATION_OF_PHOSPHOPROTEIN_PHOSPHATASE_ACTIVITY	GO_REGULATION_OF_PHOSPHOPROTEIN_PHOSPHATASE_ACTIVITY		98	0.288945	1.49549	0	0.24157	1	1077	tags=6%, list=5%, signal=6%
GO_REGULATION_OF_MACROAUTOPHAGY	GO_REGULATION_OF_MACROAUTOPHAGY		159	0.233299	1.49528	0.186691	0.241424	1	5418	tags=19%, list=25%, signal=25%
GO_CELL_ADHESION_MEDIATED_BY_INTEGRIN	GO_CELL_ADHESION_MEDIATED_BY_INTEGRIN		57	0.578497	1.49527	0	0.240669	1	3115	tags=37%, list=15%, signal=43%
GO_POSITIVE_REGULATION_OF_CELL_CYCLE_PROCESS	GO_POSITIVE_REGULATION_OF_CELL_CYCLE_PROCESS		248	0.284004	1.49512	0	0.240087	1	1079	tags=4%, list=5%, signal=4%
GO_PERICARDIUM_DEVELOPMENT	GO_PERICARDIUM_DEVELOPMENT		18	0.728298	1.49402	0	0.241438	1	1212	tags=22%, list=6%, signal=24%
GO_POSITIVE_REGULATION_OF_UBIQUITIN_DEPENDENT_PROTEIN_CATABOLIC_PROCESS	GO_POSITIVE_REGULATION_OF_UBIQUITIN_DEPENDENT_PROTEIN_CATABOLIC_PROCESS		86	0.281665	1.49367	0.0867159	0.241123	1	766	tags=3%, list=4%, signal=4%
GO_REGULATION_OF_VASCULATURE_DEVELOPMENT	GO_REGULATION_OF_VASCULATURE_DEVELOPMENT		253	0.501779	1.49221	0	0.242238	1	1399	tags=16%, list=7%, signal=17%
GO_POSITIVE_REGULATION_OF_PEPTIDYL_THREONINE_PHOSPHORYLATION	GO_POSITIVE_REGULATION_OF_PEPTIDYL_THREONINE_PHOSPHORYLATION		25	0.42184	1.49166	0	0.243483	1	5190	tags=32%, list=24%, signal=42%
GO_POSITIVE_REGULATION_OF_CATABOLIC_PROCESS	GO_POSITIVE_REGULATION_OF_CATABOLIC_PROCESS		373	0.295826	1.49151	0	0.242921	1	1068	tags=5%, list=5%, signal=5%
GO_CELLULAR_RESPONSE_TO_RETINOIC_ACID	GO_CELLULAR_RESPONSE_TO_RETINOIC_ACID		61	0.482111	1.49111	0	0.242546	1	1238	tags=16%, list=6%, signal=17%
GO_ENDOCRINE_PROCESS	GO_ENDOCRINE_PROCESS		56	0.545016	1.49007	0	0.243315	1	743	tags=20%, list=3%, signal=20%
GO_POSITIVE_REGULATION_OF_ORGAN_GROWTH	GO_POSITIVE_REGULATION_OF_ORGAN_GROWTH		45	0.44592	1.48984	0	0.242997	1	541	tags=9%, list=3%, signal=9%
GO_GRANULOCYTE_DIFFERENTIATION	GO_GRANULOCYTE_DIFFERENTIATION		21	0.548769	1.4894	0	0.242816	1	385	tags=14%, list=2%, signal=15%
GO_DRUG_TRANSMEMBRANE_TRANSPORT	GO_DRUG_TRANSMEMBRANE_TRANSPORT		65	0.427008	1.4894	0	0.242088	1	1934	tags=17%, list=9%, signal=19%
GO_POSITIVE_REGULATION_OF_RESPONSE_TO_OXIDATIVE_STRESS	GO_POSITIVE_REGULATION_OF_RESPONSE_TO_OXIDATIVE_STRESS		15	0.822886	1.48917	0	0.24226	1	1019	tags=20%, list=5%, signal=21%
GO_DNA_DAMAGE_RESPONSE_SIGNAL_TRANSDUCTION_BY_P53_CLASS_MEDIATOR	GO_DNA_DAMAGE_RESPONSE_SIGNAL_TRANSDUCTION_BY_P53_CLASS_MEDIATOR		99	0.392721	1.48894	0	0.242018	1	3604	tags=15%, list=17%, signal=18%
GO_REGULATION_OF_MYELOID_CELL_DIFFERENTIATION	GO_REGULATION_OF_MYELOID_CELL_DIFFERENTIATION		204	0.33142	1.48879	0	0.242134	1	2049	tags=11%, list=10%, signal=12%
GO_METALLOENDOPEPTIDASE_ACTIVITY	GO_METALLOENDOPEPTIDASE_ACTIVITY		84	0.483854	1.48852	0	0.242167	1	879	tags=13%, list=4%, signal=14%
GO_IN_UTERO_EMBRYONIC_DEVELOPMENT	GO_IN_UTERO_EMBRYONIC_DEVELOPMENT		314	0.331669	1.48839	0	0.241454	1	1779	tags=9%, list=8%, signal=9%
GO_POSITIVE_REGULATION_OF_CYTOSKELETON_ORGANIZATION	GO_POSITIVE_REGULATION_OF_CYTOSKELETON_ORGANIZATION		200	0.340672	1.48726	0	0.242527	1	1159	tags=7%, list=5%, signal=7%
GO_NATURAL_KILLER_CELL_MEDIATED_IMMUNITY	GO_NATURAL_KILLER_CELL_MEDIATED_IMMUNITY		33	0.498495	1.48714	0	0.242264	1	3123	tags=24%, list=15%, signal=28%
GO_CELLULAR_RESPONSE_TO_REACTIVE_OXYGEN_SPECIES	GO_CELLULAR_RESPONSE_TO_REACTIVE_OXYGEN_SPECIES		138	0.352176	1.48671	0	0.241753	1	1296	tags=9%, list=6%, signal=9%
GO_ICOSANOID_BIOSYNTHETIC_PROCESS	GO_ICOSANOID_BIOSYNTHETIC_PROCESS		29	0.640608	1.48582	0	0.24262	1	966	tags=24%, list=5%, signal=25%
GO_VASODILATION	GO_VASODILATION		24	0.558854	1.48564	0	0.242496	1	1893	tags=21%, list=9%, signal=23%
GO_REGULATION_OF_CELL_KILLING	GO_REGULATION_OF_CELL_KILLING		44	0.470927	1.48486	0	0.243361	1	912	tags=11%, list=4%, signal=12%
GO_EAR_DEVELOPMENT	GO_EAR_DEVELOPMENT		185	0.437735	1.48471	0	0.242862	1	852	tags=12%, list=4%, signal=13%
GO_REGULATION_OF_MICROTUBULE_DEPOLYMERIZATION	GO_REGULATION_OF_MICROTUBULE_DEPOLYMERIZATION		26	0.606394	1.48405	0	0.242662	1	1302	tags=12%, list=6%, signal=12%
GO_RESPIRATORY_SYSTEM_DEVELOPMENT	GO_RESPIRATORY_SYSTEM_DEVELOPMENT		175	0.443905	1.48391	0	0.24197	1	1719	tags=15%, list=8%, signal=16%
GO_REGULATION_OF_PROTEIN_LOCALIZATION_TO_CELL_PERIPHERY	GO_REGULATION_OF_PROTEIN_LOCALIZATION_TO_CELL_PERIPHERY		100	0.373425	1.48253	0	0.244118	1	2321	tags=11%, list=11%, signal=12%
GO_NEGATIVE_REGULATION_OF_INTRINSIC_APOPTOTIC_SIGNALING_PATHWAY	GO_NEGATIVE_REGULATION_OF_INTRINSIC_APOPTOTIC_SIGNALING_PATHWAY		85	0.362862	1.48253	0	0.243426	1	1092	tags=5%, list=5%, signal=5%
GO_REGULATION_OF_NIK_NF_KAPPAB_SIGNALING	GO_REGULATION_OF_NIK_NF_KAPPAB_SIGNALING		82	0.477246	1.48247	0	0.242739	1	1597	tags=12%, list=7%, signal=13%
GO_EXTRACELLULAR_MATRIX_STRUCTURAL_CONSTITUENT	GO_EXTRACELLULAR_MATRIX_STRUCTURAL_CONSTITUENT		125	0.531407	1.48245	0	0.242225	1	1465	tags=26%, list=7%, signal=27%
GO_CELLULAR_RESPONSE_TO_KETONE	GO_CELLULAR_RESPONSE_TO_KETONE		79	0.610468	1.48241	0	0.241547	1	1709	tags=22%, list=8%, signal=23%
GO_PLACENTA_BLOOD_VESSEL_DEVELOPMENT	GO_PLACENTA_BLOOD_VESSEL_DEVELOPMENT		29	0.449165	1.48199	0	0.24146	1	2215	tags=17%, list=10%, signal=19%
GO_BIOMINERAL_TISSUE_DEVELOPMENT	GO_BIOMINERAL_TISSUE_DEVELOPMENT		118	0.477251	1.48186	0	0.241286	1	1284	tags=14%, list=6%, signal=14%
GO_REGULATION_OF_RESPONSE_TO_WOUNDING	GO_REGULATION_OF_RESPONSE_TO_WOUNDING		122	0.495511	1.48185	0	0.240619	1	2253	tags=25%, list=11%, signal=27%
GO_RESPONSE_TO_CADMIUM_ION	GO_RESPONSE_TO_CADMIUM_ION		50	0.39417	1.48126	0	0.242061	1	1572	tags=10%, list=7%, signal=11%
GO_RESPONSE_TO_REACTIVE_OXYGEN_SPECIES	GO_RESPONSE_TO_REACTIVE_OXYGEN_SPECIES		190	0.360792	1.48119	0	0.241557	1	2370	tags=12%, list=11%, signal=13%
GO_INTRINSIC_APOPTOTIC_SIGNALING_PATHWAY_IN_RESPONSE_TO_DNA_DAMAGE	GO_INTRINSIC_APOPTOTIC_SIGNALING_PATHWAY_IN_RESPONSE_TO_DNA_DAMAGE		90	0.370592	1.48042	0.105263	0.241065	1	2536	tags=10%, list=12%, signal=11%
GO_POSITIVE_REGULATION_OF_BINDING	GO_POSITIVE_REGULATION_OF_BINDING		170	0.319877	1.48025	0	0.240407	1	1204	tags=6%, list=6%, signal=7%
GO_MUSCLE_CELL_DIFFERENTIATION	GO_MUSCLE_CELL_DIFFERENTIATION		288	0.337948	1.4797	0	0.241203	1	1659	tags=10%, list=8%, signal=11%
GO_DNA_BIOSYNTHETIC_PROCESS	GO_DNA_BIOSYNTHETIC_PROCESS		174	0.303231	1.47934	0	0.241091	1	1677	tags=5%, list=8%, signal=6%
GO_STRUCTURAL_CONSTITUENT_OF_CYTOSKELETON	GO_STRUCTURAL_CONSTITUENT_OF_CYTOSKELETON		71	0.391094	1.47932	0	0.24044	1	2056	tags=10%, list=10%, signal=11%
GO_NEGATIVE_REGULATION_OF_CYSTEINE_TYPE_ENDOPEPTIDASE_ACTIVITY	GO_NEGATIVE_REGULATION_OF_CYSTEINE_TYPE_ENDOPEPTIDASE_ACTIVITY		76	0.471344	1.47925	0	0.239794	1	1258	tags=11%, list=6%, signal=11%
GO_CELL_DIFFERENTIATION_INVOLVED_IN_METANEPHROS_DEVELOPMENT	GO_CELL_DIFFERENTIATION_INVOLVED_IN_METANEPHROS_DEVELOPMENT		23	0.724852	1.47917	0	0.239343	1	1780	tags=30%, list=8%, signal=33%
GO_TYPE_B_PANCREATIC_CELL_DEVELOPMENT	GO_TYPE_B_PANCREATIC_CELL_DEVELOPMENT		18	0.485111	1.47909	0	0.23885	1	2177	tags=17%, list=10%, signal=19%
GO_PEROXISOMAL_TRANSPORT	GO_PEROXISOMAL_TRANSPORT		65	0.363163	1.47874	0	0.238215	1	1387	tags=8%, list=6%, signal=8%
GO_EXTRACELLULAR_STRUCTURE_ORGANIZATION	GO_EXTRACELLULAR_STRUCTURE_ORGANIZATION		342	0.429858	1.47869	0	0.237584	1	1539	tags=17%, list=7%, signal=18%
GO_ENDOCARDIAL_CUSHION_MORPHOGENESIS	GO_ENDOCARDIAL_CUSHION_MORPHOGENESIS		33	0.642415	1.47818	0	0.237774	1	1570	tags=27%, list=7%, signal=29%
GO_HINDLIMB_MORPHOGENESIS	GO_HINDLIMB_MORPHOGENESIS		35	0.495306	1.47816	0	0.237149	1	551	tags=14%, list=3%, signal=15%
GO_LAMELLIPODIUM_ORGANIZATION	GO_LAMELLIPODIUM_ORGANIZATION		76	0.451949	1.47794	0	0.236672	1	3263	tags=20%, list=15%, signal=23%
GO_TETRAPYRROLE_METABOLIC_PROCESS	GO_TETRAPYRROLE_METABOLIC_PROCESS		22	0.563149	1.47756	0	0.236362	1	1164	tags=14%, list=5%, signal=14%
GO_POSITIVE_REGULATION_OF_TISSUE_REMODELING	GO_POSITIVE_REGULATION_OF_TISSUE_REMODELING		22	0.580892	1.47622	0	0.238024	1	394	tags=14%, list=2%, signal=14%
GO_ARTERY_DEVELOPMENT	GO_ARTERY_DEVELOPMENT		78	0.379291	1.47559	0	0.238094	1	3926	tags=26%, list=18%, signal=31%
GO_TERTIARY_GRANULE_LUMEN	GO_TERTIARY_GRANULE_LUMEN		36	0.488951	1.47525	0	0.238857	1	298	tags=8%, list=1%, signal=8%
GO_DEATH_RECEPTOR_BINDING	GO_DEATH_RECEPTOR_BINDING		15	0.597409	1.47497	0	0.238534	1	4106	tags=33%, list=19%, signal=41%
GO_BLOOD_VESSEL_MORPHOGENESIS	GO_BLOOD_VESSEL_MORPHOGENESIS		478	0.458251	1.47454	0	0.238763	1	1921	tags=18%, list=9%, signal=19%
GO_INTRAMOLECULAR_OXIDOREDUCTASE_ACTIVITY	GO_INTRAMOLECULAR_OXIDOREDUCTASE_ACTIVITY		40	0.554589	1.47359	0	0.240159	1	4635	tags=28%, list=22%, signal=35%
GO_HETEROCHROMATIN	GO_HETEROCHROMATIN		74	0.422318	1.47353	0	0.239544	1	3116	tags=12%, list=15%, signal=14%
GO_ORGANIC_ACID_SODIUM_SYMPORTER_ACTIVITY	GO_ORGANIC_ACID_SODIUM_SYMPORTER_ACTIVITY		16	0.5313	1.47276	0	0.24009	1	521	tags=19%, list=2%, signal=19%
GO_EPITHELIAL_TO_MESENCHYMAL_TRANSITION	GO_EPITHELIAL_TO_MESENCHYMAL_TRANSITION		124	0.434959	1.4718	0	0.239827	1	1092	tags=10%, list=5%, signal=11%
GO_POSITIVE_REGULATION_OF_ERYTHROCYTE_DIFFERENTIATION	GO_POSITIVE_REGULATION_OF_ERYTHROCYTE_DIFFERENTIATION		24	0.641904	1.47027	0	0.241567	1	579	tags=8%, list=3%, signal=9%
GO_KIDNEY_EPITHELIUM_DEVELOPMENT	GO_KIDNEY_EPITHELIUM_DEVELOPMENT		126	0.477509	1.46958	0	0.241813	1	3399	tags=34%, list=16%, signal=40%
GO_SH2_DOMAIN_BINDING	GO_SH2_DOMAIN_BINDING		29	0.439946	1.46935	0	0.241532	1	671	tags=10%, list=3%, signal=11%
GO_NEGATIVE_REGULATION_OF_CELL_DIVISION	GO_NEGATIVE_REGULATION_OF_CELL_DIVISION		15	0.478069	1.4691	0	0.24204	1	153	tags=7%, list=1%, signal=7%
GO_BONE_GROWTH	GO_BONE_GROWTH		39	0.609325	1.46878	0	0.242206	1	825	tags=18%, list=4%, signal=19%
GO_T_CELL_MEDIATED_CYTOTOXICITY	GO_T_CELL_MEDIATED_CYTOTOXICITY		32	0.537409	1.46817	0	0.242136	1	3571	tags=28%, list=17%, signal=34%
GO_NON_CANONICAL_WNT_SIGNALING_PATHWAY	GO_NON_CANONICAL_WNT_SIGNALING_PATHWAY		141	0.325683	1.46809	0	0.241848	1	3226	tags=13%, list=15%, signal=16%
GO_TRABECULA_MORPHOGENESIS	GO_TRABECULA_MORPHOGENESIS		44	0.440848	1.46744	0	0.241919	1	852	tags=9%, list=4%, signal=9%
GO_PSEUDOPODIUM	GO_PSEUDOPODIUM		15	0.70451	1.46726	0	0.241421	1	1550	tags=20%, list=7%, signal=22%
GO_REGULATION_OF_URINE_VOLUME	GO_REGULATION_OF_URINE_VOLUME		15	0.768848	1.46671	0	0.241017	1	818	tags=27%, list=4%, signal=28%
GO_UNSATURATED_FATTY_ACID_BIOSYNTHETIC_PROCESS	GO_UNSATURATED_FATTY_ACID_BIOSYNTHETIC_PROCESS		37	0.674118	1.46641	0	0.240618	1	1397	tags=24%, list=7%, signal=26%
GO_ODONTOGENESIS_OF_DENTIN_CONTAINING_TOOTH	GO_ODONTOGENESIS_OF_DENTIN_CONTAINING_TOOTH		78	0.456411	1.46555	0	0.24068	1	2044	tags=23%, list=10%, signal=25%
GO_MITOTIC_SPINDLE_ASSEMBLY	GO_MITOTIC_SPINDLE_ASSEMBLY		51	0.40873	1.4654	0	0.240589	1	99	tags=2%, list=0%, signal=2%
GO_CARDIAC_MUSCLE_TISSUE_DEVELOPMENT	GO_CARDIAC_MUSCLE_TISSUE_DEVELOPMENT		180	0.373883	1.46523	0	0.240236	1	1440	tags=11%, list=7%, signal=12%
GO_NEGATIVE_REGULATION_OF_MICROTUBULE_POLYMERIZATION_OR_DEPOLYMERIZATION	GO_NEGATIVE_REGULATION_OF_MICROTUBULE_POLYMERIZATION_OR_DEPOLYMERIZATION		32	0.590938	1.46375	0	0.241671	1	1302	tags=13%, list=6%, signal=13%
GO_MESONEPHRIC_TUBULE_MORPHOGENESIS	GO_MESONEPHRIC_TUBULE_MORPHOGENESIS		61	0.583793	1.46353	0	0.241391	1	981	tags=18%, list=5%, signal=19%
GO_CELL_CELL_SIGNALING_BY_WNT	GO_CELL_CELL_SIGNALING_BY_WNT		475	0.369226	1.46324	0	0.241114	1	1462	tags=9%, list=7%, signal=9%
GO_RESPONSE_TO_KETONE	GO_RESPONSE_TO_KETONE		164	0.466175	1.46267	0	0.24088	1	2051	tags=18%, list=10%, signal=19%
GO_CRANIAL_NERVE_MORPHOGENESIS	GO_CRANIAL_NERVE_MORPHOGENESIS		24	0.579347	1.46257	0	0.240462	1	1908	tags=33%, list=9%, signal=37%
GO_RESPONSE_TO_ACID_CHEMICAL	GO_RESPONSE_TO_ACID_CHEMICAL		281	0.354109	1.46184	0	0.241119	1	1296	tags=11%, list=6%, signal=11%
GO_NEGATIVE_REGULATION_OF_TRANSMEMBRANE_TRANSPORT	GO_NEGATIVE_REGULATION_OF_TRANSMEMBRANE_TRANSPORT		90	0.494866	1.46184	0	0.240543	1	1440	tags=16%, list=7%, signal=17%
GO_MATERNAL_PROCESS_INVOLVED_IN_FEMALE_PREGNANCY	GO_MATERNAL_PROCESS_INVOLVED_IN_FEMALE_PREGNANCY		49	0.449967	1.46124	0	0.240408	1	149	tags=6%, list=1%, signal=6%
GO_SOMATIC_STEM_CELL_POPULATION_MAINTENANCE	GO_SOMATIC_STEM_CELL_POPULATION_MAINTENANCE		56	0.496127	1.46122	0	0.239839	1	1204	tags=13%, list=6%, signal=13%
GO_SNARE_COMPLEX_ASSEMBLY	GO_SNARE_COMPLEX_ASSEMBLY		17	0.518561	1.46071	0	0.239839	1	169	tags=6%, list=1%, signal=6%
GO_REGULATION_OF_CELL_ADHESION_MEDIATED_BY_INTEGRIN	GO_REGULATION_OF_CELL_ADHESION_MEDIATED_BY_INTEGRIN		38	0.66583	1.46054	0	0.239606	1	2953	tags=39%, list=14%, signal=46%
GO_REGULATION_OF_CELLULAR_COMPONENT_SIZE	GO_REGULATION_OF_CELLULAR_COMPONENT_SIZE		336	0.320557	1.46041	0	0.239169	1	2862	tags=15%, list=13%, signal=17%
GO_NITRIC_OXIDE_BIOSYNTHETIC_PROCESS	GO_NITRIC_OXIDE_BIOSYNTHETIC_PROCESS		54	0.648135	1.46038	0	0.238792	1	2051	tags=30%, list=10%, signal=33%
GO_POSITIVE_REGULATION_OF_I_KAPPAB_KINASE_NF_KAPPAB_SIGNALING	GO_POSITIVE_REGULATION_OF_I_KAPPAB_KINASE_NF_KAPPAB_SIGNALING		153	0.407314	1.45958	0	0.239068	1	3292	tags=18%, list=15%, signal=21%
GO_REGULATION_OF_COAGULATION	GO_REGULATION_OF_COAGULATION		61	0.544111	1.45949	0	0.238513	1	2000	tags=31%, list=9%, signal=34%
GO_STRIATED_MUSCLE_CELL_PROLIFERATION	GO_STRIATED_MUSCLE_CELL_PROLIFERATION		58	0.451227	1.45941	0	0.238115	1	1399	tags=14%, list=7%, signal=15%
GO_NEGATIVE_REGULATION_OF_CELL_AGING	GO_NEGATIVE_REGULATION_OF_CELL_AGING		23	0.558668	1.45928	0	0.238033	1	965	tags=9%, list=5%, signal=9%
GO_SULFUR_COMPOUND_TRANSPORT	GO_SULFUR_COMPOUND_TRANSPORT		37	0.543678	1.45772	0	0.239367	1	1638	tags=16%, list=8%, signal=18%
GO_LABYRINTHINE_LAYER_BLOOD_VESSEL_DEVELOPMENT	GO_LABYRINTHINE_LAYER_BLOOD_VESSEL_DEVELOPMENT		19	0.460956	1.45734	0	0.239125	1	2215	tags=21%, list=10%, signal=23%
GO_NEPHRON_DEVELOPMENT	GO_NEPHRON_DEVELOPMENT		125	0.497346	1.45663	0	0.239245	1	2786	tags=28%, list=13%, signal=32%
GO_RENAL_SYSTEM_DEVELOPMENT	GO_RENAL_SYSTEM_DEVELOPMENT		260	0.391278	1.45641	0	0.239011	1	3399	tags=25%, list=16%, signal=30%
GO_ADRENAL_GLAND_DEVELOPMENT	GO_ADRENAL_GLAND_DEVELOPMENT		20	0.59832	1.4557	0	0.239337	1	426	tags=15%, list=2%, signal=15%
GO_COLLATERAL_SPROUTING	GO_COLLATERAL_SPROUTING		25	0.424363	1.45514	0	0.23946	1	721	tags=12%, list=3%, signal=12%
GO_PRIMARY_ALCOHOL_METABOLIC_PROCESS	GO_PRIMARY_ALCOHOL_METABOLIC_PROCESS		51	0.523512	1.45512	0	0.238917	1	436	tags=14%, list=2%, signal=14%
GO_NEGATIVE_REGULATION_OF_MICROTUBULE_DEPOLYMERIZATION	GO_NEGATIVE_REGULATION_OF_MICROTUBULE_DEPOLYMERIZATION		21	0.691634	1.45511	0	0.238378	1	1302	tags=14%, list=6%, signal=15%
GO_ORGAN_GROWTH	GO_ORGAN_GROWTH		154	0.426931	1.45464	0	0.237841	1	1440	tags=12%, list=7%, signal=12%
GO_POSITIVE_REGULATION_OF_VASCULATURE_DEVELOPMENT	GO_POSITIVE_REGULATION_OF_VASCULATURE_DEVELOPMENT		143	0.445369	1.45446	0	0.237796	1	2215	tags=19%, list=10%, signal=21%
GO_REGULATION_OF_HORMONE_METABOLIC_PROCESS	GO_REGULATION_OF_HORMONE_METABOLIC_PROCESS		31	0.4235	1.45433	0	0.237721	1	966	tags=16%, list=5%, signal=17%
GO_HEART_VALVE_DEVELOPMENT	GO_HEART_VALVE_DEVELOPMENT		54	0.584018	1.45419	0	0.237518	1	3245	tags=35%, list=15%, signal=41%
GO_EXTRACELLULAR_MATRIX_STRUCTURAL_CONSTITUENT_CONFERRING_TENSILE_STRENGTH	GO_EXTRACELLULAR_MATRIX_STRUCTURAL_CONSTITUENT_CONFERRING_TENSILE_STRENGTH		34	0.548637	1.45366	0.0962672	0.238533	1	2101	tags=29%, list=10%, signal=33%
GO_RESPONSE_TO_VITAMIN_D	GO_RESPONSE_TO_VITAMIN_D		31	0.551279	1.4533	0	0.238295	1	1171	tags=23%, list=5%, signal=24%
GO_PROTEIN_IMPORT	GO_PROTEIN_IMPORT		167	0.327975	1.45295	0	0.238548	1	1491	tags=8%, list=7%, signal=8%
GO_PROTEOGLYCAN_METABOLIC_PROCESS	GO_PROTEOGLYCAN_METABOLIC_PROCESS		69	0.528593	1.45257	0	0.239208	1	2200	tags=25%, list=10%, signal=27%
GO_NEGATIVE_REGULATION_OF_CYTOKINE_SECRETION	GO_NEGATIVE_REGULATION_OF_CYTOKINE_SECRETION		39	0.491627	1.45251	0	0.238681	1	563	tags=15%, list=3%, signal=16%
GO_ENDOCARDIAL_CUSHION_DEVELOPMENT	GO_ENDOCARDIAL_CUSHION_DEVELOPMENT		42	0.587064	1.45242	0	0.238308	1	1800	tags=26%, list=8%, signal=29%
GO_NEGATIVE_REGULATION_OF_RESPONSE_TO_EXTERNAL_STIMULUS	GO_NEGATIVE_REGULATION_OF_RESPONSE_TO_EXTERNAL_STIMULUS		238	0.380699	1.45223	0	0.238561	1	2007	tags=17%, list=9%, signal=19%
GO_MESENCHYME_DEVELOPMENT	GO_MESENCHYME_DEVELOPMENT		245	0.423678	1.4521	0	0.23804	1	1908	tags=16%, list=9%, signal=17%
GO_CELLULAR_RESPONSE_TO_UV	GO_CELLULAR_RESPONSE_TO_UV		75	0.371995	1.45176	0	0.237668	1	153	tags=3%, list=1%, signal=3%
GO_REGULATION_OF_BLOOD_PRESSURE	GO_REGULATION_OF_BLOOD_PRESSURE		128	0.490342	1.45163	0	0.23752	1	967	tags=20%, list=5%, signal=21%
GO_EMBRYONIC_ORGAN_DEVELOPMENT	GO_EMBRYONIC_ORGAN_DEVELOPMENT		378	0.428291	1.45157	0	0.237007	1	2909	tags=21%, list=14%, signal=24%
GO_RESPONSE_TO_UV	GO_RESPONSE_TO_UV		129	0.247582	1.45153	0	0.236795	1	762	tags=2%, list=4%, signal=2%
GO_REGULATION_OF_MONONUCLEAR_CELL_MIGRATION	GO_REGULATION_OF_MONONUCLEAR_CELL_MIGRATION		28	0.585028	1.45083	0	0.237472	1	2410	tags=29%, list=11%, signal=32%
GO_R_SMAD_BINDING	GO_R_SMAD_BINDING		22	0.49356	1.45079	0	0.236963	1	721	tags=9%, list=3%, signal=9%
GO_DICARBOXYLIC_ACID_TRANSMEMBRANE_TRANSPORTER_ACTIVITY	GO_DICARBOXYLIC_ACID_TRANSMEMBRANE_TRANSPORTER_ACTIVITY		29	0.621495	1.45051	0	0.237316	1	996	tags=24%, list=5%, signal=25%
GO_REACTIVE_OXYGEN_SPECIES_BIOSYNTHETIC_PROCESS	GO_REACTIVE_OXYGEN_SPECIES_BIOSYNTHETIC_PROCESS		83	0.566792	1.45051	0	0.236809	1	2636	tags=29%, list=12%, signal=33%
GO_NEGATIVE_REGULATION_OF_VASCULATURE_DEVELOPMENT	GO_NEGATIVE_REGULATION_OF_VASCULATURE_DEVELOPMENT		92	0.54953	1.44999	0	0.236459	1	2000	tags=23%, list=9%, signal=25%
GO_BRUSH_BORDER	GO_BRUSH_BORDER		75	0.465716	1.44965	0	0.236892	1	1577	tags=16%, list=7%, signal=17%
GO_PHOSPHATIDYLINOSITOL_3_KINASE_BINDING	GO_PHOSPHATIDYLINOSITOL_3_KINASE_BINDING		28	0.505636	1.44939	0	0.236678	1	4234	tags=29%, list=20%, signal=36%
GO_CELLULAR_HORMONE_METABOLIC_PROCESS	GO_CELLULAR_HORMONE_METABOLIC_PROCESS		66	0.482646	1.4491	0	0.236672	1	1572	tags=20%, list=7%, signal=21%
GO_EMBRYONIC_PLACENTA_DEVELOPMENT	GO_EMBRYONIC_PLACENTA_DEVELOPMENT		79	0.453073	1.44893	0	0.236467	1	2409	tags=18%, list=11%, signal=20%
GO_NEURAL_TUBE_FORMATION	GO_NEURAL_TUBE_FORMATION		101	0.264215	1.44874	0	0.236284	1	945	tags=5%, list=4%, signal=5%
GO_POSITIVE_REGULATION_OF_FAT_CELL_DIFFERENTIATION	GO_POSITIVE_REGULATION_OF_FAT_CELL_DIFFERENTIATION		52	0.466489	1.4487	0	0.23606	1	1741	tags=15%, list=8%, signal=17%
GO_STRUCTURAL_CONSTITUENT_OF_RIBOSOME	GO_STRUCTURAL_CONSTITUENT_OF_RIBOSOME		156	0.350436	1.44845	0.0745698	0.236017	1	8676	tags=71%, list=41%, signal=119%
GO_PROTEIN_KINASE_C_ACTIVATING_G_PROTEIN_COUPLED_RECEPTOR_SIGNALING_PATHWAY	GO_PROTEIN_KINASE_C_ACTIVATING_G_PROTEIN_COUPLED_RECEPTOR_SIGNALING_PATHWAY		24	0.615158	1.44819	0.105058	0.23579	1	1445	tags=21%, list=7%, signal=22%
GO_MITOTIC_CHROMOSOME_CONDENSATION	GO_MITOTIC_CHROMOSOME_CONDENSATION		16	0.619356	1.44751	0	0.235906	1	691	tags=6%, list=3%, signal=6%
GO_RESPONSE_TO_AXON_INJURY	GO_RESPONSE_TO_AXON_INJURY		65	0.477084	1.44732	0	0.235418	1	2051	tags=18%, list=10%, signal=20%
GO_CELLULAR_RESPONSE_TO_EXTRACELLULAR_STIMULUS	GO_CELLULAR_RESPONSE_TO_EXTRACELLULAR_STIMULUS		228	0.352533	1.44721	0	0.234933	1	1287	tags=8%, list=6%, signal=9%
GO_ACTIVATING_TRANSCRIPTION_FACTOR_BINDING	GO_ACTIVATING_TRANSCRIPTION_FACTOR_BINDING		65	0.379121	1.44672	0.0992366	0.235186	1	2705	tags=14%, list=13%, signal=16%
GO_MUSCLE_TISSUE_DEVELOPMENT	GO_MUSCLE_TISSUE_DEVELOPMENT		332	0.342834	1.44672	0	0.234704	1	1087	tags=9%, list=5%, signal=9%
GO_TEMPERATURE_HOMEOSTASIS	GO_TEMPERATURE_HOMEOSTASIS		141	0.442039	1.44629	0	0.234457	1	1237	tags=17%, list=6%, signal=18%
GO_FATTY_ACID_BIOSYNTHETIC_PROCESS	GO_FATTY_ACID_BIOSYNTHETIC_PROCESS		114	0.390331	1.44613	0	0.233979	1	347	tags=7%, list=2%, signal=7%
GO_REGULATION_OF_ERBB_SIGNALING_PATHWAY	GO_REGULATION_OF_ERBB_SIGNALING_PATHWAY		76	0.439141	1.44583	0	0.23443	1	4815	tags=32%, list=23%, signal=41%
GO_COFACTOR_METABOLIC_PROCESS	GO_COFACTOR_METABOLIC_PROCESS		361	0.258792	1.44559	0	0.233954	1	1294	tags=6%, list=6%, signal=6%
GO_AORTA_DEVELOPMENT	GO_AORTA_DEVELOPMENT		49	0.498762	1.4454	0	0.23359	1	3797	tags=27%, list=18%, signal=32%
GO_REGULATION_OF_PROTEIN_LOCALIZATION_TO_PLASMA_MEMBRANE	GO_REGULATION_OF_PROTEIN_LOCALIZATION_TO_PLASMA_MEMBRANE		84	0.395957	1.44424	0	0.23641	1	2321	tags=12%, list=11%, signal=13%
GO_NEGATIVE_REGULATION_OF_INTRINSIC_APOPTOTIC_SIGNALING_PATHWAY_IN_RESPONSE_TO_DNA_DAMAGE	GO_NEGATIVE_REGULATION_OF_INTRINSIC_APOPTOTIC_SIGNALING_PATHWAY_IN_RESPONSE_TO_DNA_DAMAGE		29	0.509798	1.44399	0.10325	0.236397	1	2536	tags=21%, list=12%, signal=23%
GO_NEGATIVE_REGULATION_OF_STEROID_METABOLIC_PROCESS	GO_NEGATIVE_REGULATION_OF_STEROID_METABOLIC_PROCESS		21	0.518159	1.44399	0	0.235922	1	1092	tags=19%, list=5%, signal=20%
GO_REGULATION_OF_MITOCHONDRIAL_MEMBRANE_POTENTIAL	GO_REGULATION_OF_MITOCHONDRIAL_MEMBRANE_POTENTIAL		60	0.377489	1.44391	0	0.235583	1	2913	tags=15%, list=14%, signal=17%
GO_BASEMENT_MEMBRANE_ORGANIZATION	GO_BASEMENT_MEMBRANE_ORGANIZATION		20	0.592255	1.44373	0.0962672	0.235112	1	468	tags=20%, list=2%, signal=20%
GO_CARTILAGE_DEVELOPMENT_INVOLVED_IN_ENDOCHONDRAL_BONE_MORPHOGENESIS	GO_CARTILAGE_DEVELOPMENT_INVOLVED_IN_ENDOCHONDRAL_BONE_MORPHOGENESIS		39	0.457854	1.44139	0	0.237161	1	3721	tags=28%, list=17%, signal=34%
GO_CLATHRIN_DEPENDENT_ENDOCYTOSIS	GO_CLATHRIN_DEPENDENT_ENDOCYTOSIS		40	0.406716	1.44136	0	0.236689	1	1925	tags=10%, list=9%, signal=11%
GO_RIBOSOMAL_SUBUNIT	GO_RIBOSOMAL_SUBUNIT		185	0.353802	1.4403	0.0745698	0.23894	1	8676	tags=69%, list=41%, signal=115%
GO_REGULATION_OF_EXTRACELLULAR_MATRIX_DISASSEMBLY	GO_REGULATION_OF_EXTRACELLULAR_MATRIX_DISASSEMBLY		16	0.587096	1.43949	0	0.239861	1	712	tags=19%, list=3%, signal=19%
GO_REGULATION_OF_VASCULAR_SMOOTH_MUSCLE_CELL_PROLIFERATION	GO_REGULATION_OF_VASCULAR_SMOOTH_MUSCLE_CELL_PROLIFERATION		44	0.411261	1.43929	0	0.239757	1	1893	tags=14%, list=9%, signal=15%
GO_SIGNALING_ADAPTOR_ACTIVITY	GO_SIGNALING_ADAPTOR_ACTIVITY		68	0.37751	1.43927	0	0.239283	1	2195	tags=16%, list=10%, signal=18%
GO_MITOTIC_NUCLEAR_DIVISION	GO_MITOTIC_NUCLEAR_DIVISION		262	0.228257	1.43847	0	0.239899	1	1116	tags=2%, list=5%, signal=2%
GO_REGULATION_OF_CYSTEINE_TYPE_ENDOPEPTIDASE_ACTIVITY	GO_REGULATION_OF_CYSTEINE_TYPE_ENDOPEPTIDASE_ACTIVITY		190	0.384923	1.4382	0	0.239426	1	1258	tags=9%, list=6%, signal=10%
GO_REGULATION_OF_RESPONSE_TO_BIOTIC_STIMULUS	GO_REGULATION_OF_RESPONSE_TO_BIOTIC_STIMULUS		99	0.298625	1.43816	0	0.238956	1	1489	tags=8%, list=7%, signal=9%
GO_CAJAL_BODY	GO_CAJAL_BODY		60	0.349611	1.43789	0	0.238993	1	6828	tags=37%, list=32%, signal=54%
GO_PROTEIN_PHOSPHATASE_1_BINDING	GO_PROTEIN_PHOSPHATASE_1_BINDING		17	0.532448	1.43753	0	0.238787	1	337	tags=12%, list=2%, signal=12%
GO_NEGATIVE_REGULATION_OF_APOPTOTIC_SIGNALING_PATHWAY	GO_NEGATIVE_REGULATION_OF_APOPTOTIC_SIGNALING_PATHWAY		196	0.371476	1.4374	0	0.238476	1	1092	tags=6%, list=5%, signal=6%
GO_REGULATION_OF_ANATOMICAL_STRUCTURE_SIZE	GO_REGULATION_OF_ANATOMICAL_STRUCTURE_SIZE		430	0.347299	1.43708	0	0.238223	1	2044	tags=13%, list=10%, signal=15%
GO_CELLULAR_RESPONSE_TO_EXOGENOUS_DSRNA	GO_CELLULAR_RESPONSE_TO_EXOGENOUS_DSRNA		15	0.517453	1.43691	0	0.237761	1	3749	tags=20%, list=18%, signal=24%
GO_REGULATION_OF_ORGAN_GROWTH	GO_REGULATION_OF_ORGAN_GROWTH		84	0.374602	1.43691	0	0.237302	1	1440	tags=8%, list=7%, signal=9%
GO_POSITIVE_REGULATION_OF_DNA_BINDING	GO_POSITIVE_REGULATION_OF_DNA_BINDING		55	0.385012	1.43617	0	0.238233	1	1204	tags=9%, list=6%, signal=10%
GO_POSITIVE_REGULATION_OF_ERBB_SIGNALING_PATHWAY	GO_POSITIVE_REGULATION_OF_ERBB_SIGNALING_PATHWAY		24	0.609943	1.43607	0	0.237927	1	1893	tags=25%, list=9%, signal=27%
GO_CANONICAL_WNT_SIGNALING_PATHWAY	GO_CANONICAL_WNT_SIGNALING_PATHWAY		300	0.389122	1.43588	0	0.237898	1	1566	tags=10%, list=7%, signal=11%
GO_MESENCHYMAL_TO_EPITHELIAL_TRANSITION	GO_MESENCHYMAL_TO_EPITHELIAL_TRANSITION		19	0.726345	1.43549	0	0.237822	1	708	tags=26%, list=3%, signal=27%
GO_CHROMOSOME_CONDENSATION	GO_CHROMOSOME_CONDENSATION		35	0.475022	1.43515	0.0989899	0.238049	1	777	tags=6%, list=4%, signal=6%
GO_METANEPHRIC_NEPHRON_MORPHOGENESIS	GO_METANEPHRIC_NEPHRON_MORPHOGENESIS		24	0.640131	1.4347	0	0.238171	1	1719	tags=25%, list=8%, signal=27%
GO_BONE_REMODELING	GO_BONE_REMODELING		68	0.476962	1.4344	0	0.238173	1	3339	tags=25%, list=16%, signal=30%
GO_POSITIVE_REGULATION_OF_CELL_KILLING	GO_POSITIVE_REGULATION_OF_CELL_KILLING		34	0.498474	1.43434	0	0.238008	1	912	tags=12%, list=4%, signal=12%
GO_NEGATIVE_REGULATION_OF_REACTIVE_OXYGEN_SPECIES_BIOSYNTHETIC_PROCESS	GO_NEGATIVE_REGULATION_OF_REACTIVE_OXYGEN_SPECIES_BIOSYNTHETIC_PROCESS		24	0.720768	1.43408	0	0.238227	1	2349	tags=33%, list=11%, signal=37%
GO_POSITIVE_REGULATION_OF_MORPHOGENESIS_OF_AN_EPITHELIUM	GO_POSITIVE_REGULATION_OF_MORPHOGENESIS_OF_AN_EPITHELIUM		29	0.596958	1.43402	0	0.237777	1	1893	tags=21%, list=9%, signal=23%
GO_EXTRACELLULAR_MATRIX_BINDING	GO_EXTRACELLULAR_MATRIX_BINDING		53	0.606143	1.43369	0	0.237801	1	1262	tags=25%, list=6%, signal=26%
GO_EMBRYONIC_SKELETAL_SYSTEM_MORPHOGENESIS	GO_EMBRYONIC_SKELETAL_SYSTEM_MORPHOGENESIS		89	0.636225	1.43332	0	0.237885	1	2909	tags=37%, list=14%, signal=43%
GO_POSTSYNAPTIC_SPECIALIZATION_INTRACELLULAR_COMPONENT	GO_POSTSYNAPTIC_SPECIALIZATION_INTRACELLULAR_COMPONENT		20	0.545764	1.43312	0	0.23783	1	2349	tags=15%, list=11%, signal=17%
GO_NEGATIVE_REGULATION_OF_LIPID_BIOSYNTHETIC_PROCESS	GO_NEGATIVE_REGULATION_OF_LIPID_BIOSYNTHETIC_PROCESS		40	0.393505	1.43287	0	0.237585	1	225	tags=8%, list=1%, signal=8%
GO_TRANSCRIPTION_COREPRESSOR_ACTIVITY	GO_TRANSCRIPTION_COREPRESSOR_ACTIVITY		216	0.297374	1.43275	0	0.237523	1	981	tags=4%, list=5%, signal=4%
GO_METANEPHRIC_MESENCHYME_DEVELOPMENT	GO_METANEPHRIC_MESENCHYME_DEVELOPMENT		15	0.782957	1.43264	0	0.237309	1	613	tags=27%, list=3%, signal=27%
GO_METANEPHRIC_NEPHRON_DEVELOPMENT	GO_METANEPHRIC_NEPHRON_DEVELOPMENT		35	0.65271	1.43243	0	0.237123	1	981	tags=20%, list=5%, signal=21%
GO_REGULATION_OF_SUPRAMOLECULAR_FIBER_ORGANIZATION	GO_REGULATION_OF_SUPRAMOLECULAR_FIBER_ORGANIZATION		303	0.304192	1.43207	0	0.237133	1	1446	tags=8%, list=7%, signal=8%
GO_RESPONSE_TO_IONIZING_RADIATION	GO_RESPONSE_TO_IONIZING_RADIATION		136	0.268125	1.43182	0.177388	0.237213	1	3758	tags=10%, list=18%, signal=12%
GO_RESPONSE_TO_OXYGEN_LEVELS	GO_RESPONSE_TO_OXYGEN_LEVELS		344	0.315816	1.43166	0	0.236875	1	1068	tags=6%, list=5%, signal=6%
GO_REGULATION_OF_JUN_KINASE_ACTIVITY	GO_REGULATION_OF_JUN_KINASE_ACTIVITY		75	0.402441	1.43129	0	0.236538	1	1219	tags=8%, list=6%, signal=8%
GO_POSTSYNAPTIC_DENSITY_INTRACELLULAR_COMPONENT	GO_POSTSYNAPTIC_DENSITY_INTRACELLULAR_COMPONENT		17	0.579425	1.43123	0	0.236515	1	2349	tags=18%, list=11%, signal=20%
GO_HEART_DEVELOPMENT	GO_HEART_DEVELOPMENT		479	0.308561	1.43066	0	0.236759	1	1908	tags=10%, list=9%, signal=11%
GO_MAGNESIUM_ION_BINDING	GO_MAGNESIUM_ION_BINDING		193	0.297281	1.43023	0	0.237006	1	1116	tags=4%, list=5%, signal=4%
GO_BRANCHING_MORPHOGENESIS_OF_AN_EPITHELIAL_TUBE	GO_BRANCHING_MORPHOGENESIS_OF_AN_EPITHELIAL_TUBE		135	0.508928	1.43012	0	0.236792	1	3361	tags=26%, list=16%, signal=31%
GO_METANEPHROS_DEVELOPMENT	GO_METANEPHROS_DEVELOPMENT		80	0.527086	1.42978	0	0.237384	1	1907	tags=20%, list=9%, signal=22%
GO_REGULATION_OF_ACTIN_FILAMENT_BUNDLE_ASSEMBLY	GO_REGULATION_OF_ACTIN_FILAMENT_BUNDLE_ASSEMBLY		82	0.339857	1.42964	0	0.236954	1	517	tags=6%, list=2%, signal=6%
GO_NEPHRON_EPITHELIUM_DEVELOPMENT	GO_NEPHRON_EPITHELIUM_DEVELOPMENT		97	0.500339	1.42952	0	0.236818	1	2520	tags=27%, list=12%, signal=30%
GO_3_UTR_MEDIATED_MRNA_DESTABILIZATION	GO_3_UTR_MEDIATED_MRNA_DESTABILIZATION		16	0.550868	1.42802	0	0.23807	1	1068	tags=13%, list=5%, signal=13%
GO_REGULATION_OF_WNT_SIGNALING_PATHWAY	GO_REGULATION_OF_WNT_SIGNALING_PATHWAY		327	0.392415	1.42771	0	0.238035	1	1566	tags=10%, list=7%, signal=10%
GO_MESONEPHROS_DEVELOPMENT	GO_MESONEPHROS_DEVELOPMENT		94	0.510089	1.42748	0	0.238001	1	3399	tags=33%, list=16%, signal=39%
GO_PEROXISOME_PROLIFERATOR_ACTIVATED_RECEPTOR_SIGNALING_PATHWAY	GO_PEROXISOME_PROLIFERATOR_ACTIVATED_RECEPTOR_SIGNALING_PATHWAY		18	0.563096	1.42728	0	0.23767	1	149	tags=11%, list=1%, signal=11%
GO_IMMUNOLOGICAL_SYNAPSE	GO_IMMUNOLOGICAL_SYNAPSE		26	0.584807	1.42677	0	0.237987	1	2242	tags=27%, list=11%, signal=30%
GO_MYELOID_LEUKOCYTE_MEDIATED_IMMUNITY	GO_MYELOID_LEUKOCYTE_MEDIATED_IMMUNITY		422	0.306739	1.42659	0	0.237879	1	1597	tags=7%, list=7%, signal=7%
GO_REGULATION_OF_CELL_CYCLE_G1_S_PHASE_TRANSITION	GO_REGULATION_OF_CELL_CYCLE_G1_S_PHASE_TRANSITION		152	0.336894	1.42645	0	0.237905	1	2619	tags=10%, list=12%, signal=11%
GO_HEPARAN_SULFATE_PROTEOGLYCAN_METABOLIC_PROCESS	GO_HEPARAN_SULFATE_PROTEOGLYCAN_METABOLIC_PROCESS		34	0.646397	1.42622	0	0.237966	1	3312	tags=38%, list=16%, signal=45%
GO_CELLULAR_RESPONSE_TO_HYDROGEN_PEROXIDE	GO_CELLULAR_RESPONSE_TO_HYDROGEN_PEROXIDE		80	0.410621	1.42617	0	0.237544	1	2107	tags=11%, list=10%, signal=12%
GO_NAD_BIOSYNTHESIS_VIA_NICOTINAMIDE_RIBOSIDE_SALVAGE_PATHWAY	GO_NAD_BIOSYNTHESIS_VIA_NICOTINAMIDE_RIBOSIDE_SALVAGE_PATHWAY		15	0.55921	1.42598	0	0.237522	1	149	tags=13%, list=1%, signal=13%
GO_RESPONSE_TO_MINERALOCORTICOID	GO_RESPONSE_TO_MINERALOCORTICOID		24	0.474909	1.42593	0	0.237342	1	430	tags=13%, list=2%, signal=13%
GO_POSITIVE_REGULATION_OF_CYCLIN_DEPENDENT_PROTEIN_KINASE_ACTIVITY	GO_POSITIVE_REGULATION_OF_CYCLIN_DEPENDENT_PROTEIN_KINASE_ACTIVITY		34	0.495541	1.42484	0.107143	0.23821	1	1193	tags=12%, list=6%, signal=12%
GO_NEGATIVE_REGULATION_OF_NUCLEOBASE_CONTAINING_COMPOUND_METABOLIC_PROCESS	GO_NEGATIVE_REGULATION_OF_NUCLEOBASE_CONTAINING_COMPOUND_METABOLIC_PROCESS		134	0.224851	1.42455	0.0994264	0.238074	1	1503	tags=4%, list=7%, signal=4%
GO_SEMI_LUNAR_VALVE_DEVELOPMENT	GO_SEMI_LUNAR_VALVE_DEVELOPMENT		36	0.573304	1.42442	0	0.237868	1	2410	tags=31%, list=11%, signal=34%
GO_LARGE_RIBOSOMAL_SUBUNIT	GO_LARGE_RIBOSOMAL_SUBUNIT		117	0.428404	1.42434	0	0.237563	1	9180	tags=78%, list=43%, signal=136%
GO_SH3_SH2_ADAPTOR_ACTIVITY	GO_SH3_SH2_ADAPTOR_ACTIVITY		44	0.377317	1.42432	0	0.237266	1	2195	tags=18%, list=10%, signal=20%
GO_CELL_CYCLE_CHECKPOINT	GO_CELL_CYCLE_CHECKPOINT		205	0.17827	1.42345	0	0.238446	1	8089	tags=41%, list=38%, signal=65%
GO_REGULATION_OF_ENDOTHELIAL_CELL_MIGRATION	GO_REGULATION_OF_ENDOTHELIAL_CELL_MIGRATION		134	0.461335	1.42294	0	0.238258	1	2786	tags=24%, list=13%, signal=27%
GO_GROWTH_PLATE_CARTILAGE_DEVELOPMENT	GO_GROWTH_PLATE_CARTILAGE_DEVELOPMENT		29	0.523165	1.42233	0	0.238614	1	3652	tags=31%, list=17%, signal=37%
GO_POSITIVE_REGULATION_OF_SMOOTH_MUSCLE_CONTRACTION	GO_POSITIVE_REGULATION_OF_SMOOTH_MUSCLE_CONTRACTION		26	0.553192	1.4221	0	0.238432	1	2761	tags=42%, list=13%, signal=49%
GO_CELL_CYCLE_ARREST	GO_CELL_CYCLE_ARREST		221	0.328647	1.42065	0	0.240725	1	4899	tags=21%, list=23%, signal=27%
GO_CARTILAGE_MORPHOGENESIS	GO_CARTILAGE_MORPHOGENESIS		24	0.662173	1.42005	0	0.241039	1	1092	tags=25%, list=5%, signal=26%
GO_POSITIVE_REGULATION_OF_NUCLEOTIDE_BIOSYNTHETIC_PROCESS	GO_POSITIVE_REGULATION_OF_NUCLEOTIDE_BIOSYNTHETIC_PROCESS		15	0.733788	1.41939	0	0.241503	1	1211	tags=27%, list=6%, signal=28%
GO_UROGENITAL_SYSTEM_DEVELOPMENT	GO_UROGENITAL_SYSTEM_DEVELOPMENT		292	0.386383	1.41893	0	0.241861	1	3399	tags=25%, list=16%, signal=29%
GO_ENDOTHELIAL_CELL_MIGRATION	GO_ENDOTHELIAL_CELL_MIGRATION		175	0.418823	1.41893	0	0.241563	1	3725	tags=30%, list=17%, signal=36%
GO_TISSUE_REMODELING	GO_TISSUE_REMODELING		125	0.478247	1.4189	0	0.241271	1	3339	tags=27%, list=16%, signal=32%
GO_POSITIVE_REGULATION_OF_PROTEOLYSIS_INVOLVED_IN_CELLULAR_PROTEIN_CATABOLIC_PROCESS	GO_POSITIVE_REGULATION_OF_PROTEOLYSIS_INVOLVED_IN_CELLULAR_PROTEIN_CATABOLIC_PROCESS		107	0.284313	1.41884	0	0.240961	1	907	tags=4%, list=4%, signal=4%
GO_REGULATION_OF_CYTOPLASMIC_TRANSLATION	GO_REGULATION_OF_CYTOPLASMIC_TRANSLATION		28	0.446874	1.41851	0	0.240776	1	2536	tags=18%, list=12%, signal=20%
GO_REGULATION_OF_PH	GO_REGULATION_OF_PH		83	0.437731	1.41819	0	0.240684	1	1543	tags=12%, list=7%, signal=13%
GO_EMBRYONIC_CAMERA_TYPE_EYE_DEVELOPMENT	GO_EMBRYONIC_CAMERA_TYPE_EYE_DEVELOPMENT		35	0.553883	1.41813	0	0.240275	1	882	tags=11%, list=4%, signal=12%
GO_INTERLEUKIN_2_PRODUCTION	GO_INTERLEUKIN_2_PRODUCTION		50	0.594508	1.41736	0	0.240577	1	2242	tags=30%, list=11%, signal=33%
GO_COAGULATION	GO_COAGULATION		264	0.385081	1.4172	0	0.240416	1	1561	tags=13%, list=7%, signal=14%
GO_REGULATION_OF_KETONE_BIOSYNTHETIC_PROCESS	GO_REGULATION_OF_KETONE_BIOSYNTHETIC_PROCESS		15	0.67779	1.41709	0	0.240103	1	966	tags=27%, list=5%, signal=28%
GO_POSITIVE_REGULATION_OF_SMOOTH_MUSCLE_CELL_MIGRATION	GO_POSITIVE_REGULATION_OF_SMOOTH_MUSCLE_CELL_MIGRATION		32	0.421554	1.41704	0	0.239964	1	1893	tags=19%, list=9%, signal=21%
GO_REGULATION_OF_WOUND_HEALING	GO_REGULATION_OF_WOUND_HEALING		99	0.497846	1.41698	0	0.239561	1	2253	tags=27%, list=11%, signal=30%
GO_OUTFLOW_TRACT_MORPHOGENESIS	GO_OUTFLOW_TRACT_MORPHOGENESIS		74	0.464508	1.41662	0	0.239352	1	3926	tags=32%, list=18%, signal=40%
GO_REGULATION_OF_SYSTEMIC_ARTERIAL_BLOOD_PRESSURE_BY_HORMONE	GO_REGULATION_OF_SYSTEMIC_ARTERIAL_BLOOD_PRESSURE_BY_HORMONE		25	0.648838	1.41569	0.131579	0.239707	1	743	tags=36%, list=3%, signal=37%
GO_CARDIAC_SEPTUM_DEVELOPMENT	GO_CARDIAC_SEPTUM_DEVELOPMENT		101	0.490761	1.41491	0	0.241113	1	3926	tags=30%, list=18%, signal=36%
GO_ANTERIOR_POSTERIOR_PATTERN_SPECIFICATION	GO_ANTERIOR_POSTERIOR_PATTERN_SPECIFICATION		179	0.582998	1.41451	0	0.24119	1	1797	tags=25%, list=8%, signal=27%
GO_POSITIVE_REGULATION_OF_T_CELL_MEDIATED_CYTOTOXICITY	GO_POSITIVE_REGULATION_OF_T_CELL_MEDIATED_CYTOTOXICITY		16	0.591018	1.41231	0.0992366	0.243541	1	762	tags=13%, list=4%, signal=13%
GO_JNK_CASCADE	GO_JNK_CASCADE		176	0.322677	1.41182	0	0.243401	1	1258	tags=9%, list=6%, signal=9%
GO_CARDIAC_CHAMBER_DEVELOPMENT	GO_CARDIAC_CHAMBER_DEVELOPMENT		149	0.339858	1.41136	0	0.243621	1	3255	tags=19%, list=15%, signal=23%
GO_T_CELL_RECEPTOR_SIGNALING_PATHWAY	GO_T_CELL_RECEPTOR_SIGNALING_PATHWAY		157	0.318717	1.41132	0	0.243217	1	1717	tags=8%, list=8%, signal=8%
GO_REGULATION_OF_REACTIVE_OXYGEN_SPECIES_BIOSYNTHETIC_PROCESS	GO_REGULATION_OF_REACTIVE_OXYGEN_SPECIES_BIOSYNTHETIC_PROCESS		66	0.577376	1.41099	0	0.243293	1	2051	tags=24%, list=10%, signal=27%
GO_SPINDLE_ASSEMBLY	GO_SPINDLE_ASSEMBLY		95	0.284693	1.41037	0	0.243192	1	638	tags=2%, list=3%, signal=2%
GO_EPIDERMAL_GROWTH_FACTOR_RECEPTOR_SIGNALING_PATHWAY	GO_EPIDERMAL_GROWTH_FACTOR_RECEPTOR_SIGNALING_PATHWAY		102	0.365866	1.41012	0	0.243238	1	4299	tags=25%, list=20%, signal=32%
GO_WNT_SIGNALING_PATHWAY_CALCIUM_MODULATING_PATHWAY	GO_WNT_SIGNALING_PATHWAY_CALCIUM_MODULATING_PATHWAY		37	0.507047	1.41006	0	0.243236	1	3204	tags=22%, list=15%, signal=25%
GO_KIDNEY_MESENCHYME_DEVELOPMENT	GO_KIDNEY_MESENCHYME_DEVELOPMENT		19	0.788899	1.40955	0	0.243822	1	613	tags=26%, list=3%, signal=27%
GO_ENDODERM_FORMATION	GO_ENDODERM_FORMATION		43	0.548329	1.40946	0	0.243423	1	1287	tags=16%, list=6%, signal=17%
GO_RESPONSE_TO_HEPATOCYTE_GROWTH_FACTOR	GO_RESPONSE_TO_HEPATOCYTE_GROWTH_FACTOR		16	0.62969	1.40937	0.189293	0.243372	1	4149	tags=31%, list=19%, signal=39%
GO_CARDIAC_MUSCLE_CELL_PROLIFERATION	GO_CARDIAC_MUSCLE_CELL_PROLIFERATION		46	0.472226	1.40923	0	0.243043	1	3399	tags=26%, list=16%, signal=31%
GO_CHONDROCYTE_DEVELOPMENT_INVOLVED_IN_ENDOCHONDRAL_BONE_MORPHOGENESIS	GO_CHONDROCYTE_DEVELOPMENT_INVOLVED_IN_ENDOCHONDRAL_BONE_MORPHOGENESIS		19	0.593054	1.4089	0.0953307	0.243008	1	533	tags=11%, list=2%, signal=11%
GO_REPRODUCTIVE_SYSTEM_DEVELOPMENT	GO_REPRODUCTIVE_SYSTEM_DEVELOPMENT		370	0.396846	1.40881	0	0.242914	1	2267	tags=16%, list=11%, signal=18%
GO_EXTRACELLULAR_MATRIX_COMPONENT	GO_EXTRACELLULAR_MATRIX_COMPONENT		45	0.570522	1.40791	0	0.244378	1	2101	tags=31%, list=10%, signal=34%
GO_ENDOCHONDRAL_BONE_MORPHOGENESIS	GO_ENDOCHONDRAL_BONE_MORPHOGENESIS		63	0.48616	1.40783	0	0.244179	1	3721	tags=30%, list=17%, signal=36%
GO_REGULATION_OF_CARDIAC_MUSCLE_TISSUE_DEVELOPMENT	GO_REGULATION_OF_CARDIAC_MUSCLE_TISSUE_DEVELOPMENT		74	0.363255	1.40738	0	0.244686	1	541	tags=7%, list=3%, signal=7%
GO_REGULATION_OF_SYSTEMIC_ARTERIAL_BLOOD_PRESSURE_MEDIATED_BY_A_CHEMICAL_SIGNAL	GO_REGULATION_OF_SYSTEMIC_ARTERIAL_BLOOD_PRESSURE_MEDIATED_BY_A_CHEMICAL_SIGNAL		31	0.641374	1.40704	0	0.244719	1	743	tags=32%, list=3%, signal=33%
GO_PROTEIN_DEPHOSPHORYLATION	GO_PROTEIN_DEPHOSPHORYLATION		279	0.281178	1.40702	0	0.244325	1	1618	tags=6%, list=8%, signal=7%
GO_REGULATION_OF_PHAGOCYTOSIS	GO_REGULATION_OF_PHAGOCYTOSIS		65	0.409919	1.40692	0	0.243933	1	1064	tags=14%, list=5%, signal=15%
GO_POSITIVE_REGULATION_OF_PHAGOCYTOSIS	GO_POSITIVE_REGULATION_OF_PHAGOCYTOSIS		46	0.446034	1.40682	0	0.243871	1	1561	tags=17%, list=7%, signal=19%
GO_SULFURIC_ESTER_HYDROLASE_ACTIVITY	GO_SULFURIC_ESTER_HYDROLASE_ACTIVITY		15	0.534751	1.40679	0	0.243481	1	1443	tags=20%, list=7%, signal=21%
GO_CARDIAC_MUSCLE_CELL_DIFFERENTIATION	GO_CARDIAC_MUSCLE_CELL_DIFFERENTIATION		96	0.389128	1.40624	0	0.243992	1	1621	tags=13%, list=8%, signal=13%
GO_WNT_PROTEIN_BINDING	GO_WNT_PROTEIN_BINDING		33	0.475844	1.40557	0	0.245048	1	4068	tags=42%, list=19%, signal=52%
GO_POSITIVE_REGULATION_OF_RESPONSE_TO_DNA_DAMAGE_STIMULUS	GO_POSITIVE_REGULATION_OF_RESPONSE_TO_DNA_DAMAGE_STIMULUS		89	0.31662	1.40527	0	0.245172	1	272	tags=3%, list=1%, signal=3%
GO_EMBRYONIC_DIGIT_MORPHOGENESIS	GO_EMBRYONIC_DIGIT_MORPHOGENESIS		57	0.466143	1.4038	0	0.246361	1	3926	tags=32%, list=18%, signal=39%
GO_EMBRYONIC_SKELETAL_SYSTEM_DEVELOPMENT	GO_EMBRYONIC_SKELETAL_SYSTEM_DEVELOPMENT		118	0.62333	1.40309	0	0.246975	1	2909	tags=36%, list=14%, signal=42%
GO_EMBRYONIC_PLACENTA_MORPHOGENESIS	GO_EMBRYONIC_PLACENTA_MORPHOGENESIS		21	0.585753	1.40267	0	0.247214	1	882	tags=19%, list=4%, signal=20%
GO_EPITHELIAL_CELL_PROLIFERATION	GO_EPITHELIAL_CELL_PROLIFERATION		310	0.410457	1.40254	0	0.247303	1	1817	tags=16%, list=9%, signal=17%
GO_DRUG_TRANSMEMBRANE_TRANSPORTER_ACTIVITY	GO_DRUG_TRANSMEMBRANE_TRANSPORTER_ACTIVITY		76	0.410546	1.40207	0	0.248282	1	1044	tags=11%, list=5%, signal=11%
GO_POSITIVE_REGULATION_OF_CELL_SUBSTRATE_ADHESION	GO_POSITIVE_REGULATION_OF_CELL_SUBSTRATE_ADHESION		97	0.444608	1.4019	0	0.24789	1	1991	tags=18%, list=9%, signal=19%
GO_GLOMERULAR_EPITHELIUM_DEVELOPMENT	GO_GLOMERULAR_EPITHELIUM_DEVELOPMENT		17	0.530395	1.40091	0	0.248839	1	2169	tags=35%, list=10%, signal=39%
GO_C21_STEROID_HORMONE_BIOSYNTHETIC_PROCESS	GO_C21_STEROID_HORMONE_BIOSYNTHETIC_PROCESS		21	0.5309	1.4008	0	0.248663	1	2051	tags=29%, list=10%, signal=32%
GO_CHROMOSOMAL_REGION	GO_CHROMOSOMAL_REGION		326	0.250712	1.40079	0	0.248273	1	8294	tags=42%, list=39%, signal=68%
GO_NUCLEAR_NUCLEOSOME	GO_NUCLEAR_NUCLEOSOME		31	0.613155	1.40014	0	0.248604	1	1712	tags=10%, list=8%, signal=11%
GO_IRON_ION_HOMEOSTASIS	GO_IRON_ION_HOMEOSTASIS		69	0.392939	1.40013	0	0.248298	1	1438	tags=9%, list=7%, signal=9%
GO_CELL_SUBSTRATE_ADHESION	GO_CELL_SUBSTRATE_ADHESION		284	0.471794	1.40003	0	0.248014	1	3263	tags=26%, list=15%, signal=30%
GO_MISFOLDED_PROTEIN_BINDING	GO_MISFOLDED_PROTEIN_BINDING		20	0.396523	1.3999	0	0.247912	1	623	tags=10%, list=3%, signal=10%
GO_NEGATIVE_REGULATION_OF_OSSIFICATION	GO_NEGATIVE_REGULATION_OF_OSSIFICATION		58	0.402252	1.39971	0	0.247844	1	825	tags=9%, list=4%, signal=9%
GO_NEGATIVE_REGULATION_OF_TOLL_LIKE_RECEPTOR_SIGNALING_PATHWAY	GO_NEGATIVE_REGULATION_OF_TOLL_LIKE_RECEPTOR_SIGNALING_PATHWAY		30	0.584644	1.39956	0	0.247725	1	4079	tags=33%, list=19%, signal=41%
GO_NEGATIVE_REGULATION_OF_PROTEIN_BINDING	GO_NEGATIVE_REGULATION_OF_PROTEIN_BINDING		86	0.336682	1.39948	0	0.247343	1	1446	tags=9%, list=7%, signal=10%
GO_MORPHOGENESIS_OF_AN_EPITHELIUM	GO_MORPHOGENESIS_OF_AN_EPITHELIUM		473	0.368811	1.39946	0	0.247063	1	2434	tags=14%, list=11%, signal=16%
GO_REGULATION_OF_CELL_SHAPE	GO_REGULATION_OF_CELL_SHAPE		129	0.305465	1.39901	0	0.247086	1	3094	tags=18%, list=14%, signal=21%
GO_VASCULAR_PROCESS_IN_CIRCULATORY_SYSTEM	GO_VASCULAR_PROCESS_IN_CIRCULATORY_SYSTEM		120	0.427788	1.39844	0	0.247309	1	867	tags=18%, list=4%, signal=18%
GO_MORPHOGENESIS_OF_A_BRANCHING_STRUCTURE	GO_MORPHOGENESIS_OF_A_BRANCHING_STRUCTURE		174	0.478608	1.3982	0	0.247291	1	3399	tags=28%, list=16%, signal=33%
GO_RENAL_TUBULE_DEVELOPMENT	GO_RENAL_TUBULE_DEVELOPMENT		87	0.499652	1.39799	0	0.247115	1	3334	tags=34%, list=16%, signal=41%
GO_POSITIVE_REGULATION_OF_STRESS_FIBER_ASSEMBLY	GO_POSITIVE_REGULATION_OF_STRESS_FIBER_ASSEMBLY		45	0.405016	1.39774	0	0.247003	1	268	tags=7%, list=1%, signal=7%
GO_CELLULAR_KETONE_METABOLIC_PROCESS	GO_CELLULAR_KETONE_METABOLIC_PROCESS		164	0.325082	1.39739	0	0.246934	1	966	tags=5%, list=5%, signal=6%
GO_COLLAGEN_CONTAINING_EXTRACELLULAR_MATRIX	GO_COLLAGEN_CONTAINING_EXTRACELLULAR_MATRIX		293	0.442876	1.39717	0	0.247037	1	2428	tags=24%, list=11%, signal=27%
GO_MICROVILLUS	GO_MICROVILLUS		63	0.399997	1.39656	0	0.247888	1	3095	tags=22%, list=15%, signal=26%
GO_CELLULAR_RESPONSE_TO_REACTIVE_NITROGEN_SPECIES	GO_CELLULAR_RESPONSE_TO_REACTIVE_NITROGEN_SPECIES		18	0.515682	1.3961	0	0.248565	1	879	tags=17%, list=4%, signal=17%
GO_OSSIFICATION	GO_OSSIFICATION		321	0.442841	1.39594	0	0.248307	1	3238	tags=23%, list=15%, signal=27%
GO_NEUROTRANSMITTER_REUPTAKE	GO_NEUROTRANSMITTER_REUPTAKE		16	0.709307	1.39549	0	0.248395	1	1934	tags=44%, list=9%, signal=48%
GO_MESENCHYMAL_CELL_PROLIFERATION	GO_MESENCHYMAL_CELL_PROLIFERATION		44	0.482532	1.39522	0	0.248653	1	4305	tags=41%, list=20%, signal=51%
GO_REGULATION_OF_ENDOCRINE_PROCESS	GO_REGULATION_OF_ENDOCRINE_PROCESS		29	0.550082	1.39481	0.101365	0.248788	1	1982	tags=24%, list=9%, signal=27%
GO_POSITIVE_REGULATION_OF_SODIUM_ION_TRANSPORT	GO_POSITIVE_REGULATION_OF_SODIUM_ION_TRANSPORT		33	0.424116	1.39478	0	0.248502	1	1281	tags=12%, list=6%, signal=13%
GO_MODULATION_BY_SYMBIONT_OF_HOST_CELLULAR_PROCESS	GO_MODULATION_BY_SYMBIONT_OF_HOST_CELLULAR_PROCESS		25	0.330629	1.39436	0	0.248604	1	5848	tags=36%, list=27%, signal=50%
GO_ANTERIOR_POSTERIOR_AXIS_SPECIFICATION	GO_ANTERIOR_POSTERIOR_AXIS_SPECIFICATION		38	0.564149	1.39425	0	0.248414	1	1621	tags=21%, list=8%, signal=23%
GO_POSITIVE_REGULATION_OF_NF_KAPPAB_TRANSCRIPTION_FACTOR_ACTIVITY	GO_POSITIVE_REGULATION_OF_NF_KAPPAB_TRANSCRIPTION_FACTOR_ACTIVITY		125	0.430361	1.39413	0	0.248413	1	1248	tags=10%, list=6%, signal=11%
GO_ADAPTIVE_THERMOGENESIS	GO_ADAPTIVE_THERMOGENESIS		127	0.434219	1.39351	0	0.249003	1	1438	tags=17%, list=7%, signal=18%
GO_NIK_NF_KAPPAB_SIGNALING	GO_NIK_NF_KAPPAB_SIGNALING		138	0.360158	1.39324	0	0.248852	1	2337	tags=9%, list=11%, signal=11%
GO_REGULATION_OF_SYSTEMIC_ARTERIAL_BLOOD_PRESSURE	GO_REGULATION_OF_SYSTEMIC_ARTERIAL_BLOOD_PRESSURE		63	0.602234	1.39317	0.133843	0.248569	1	967	tags=27%, list=5%, signal=28%
GO_LABYRINTHINE_LAYER_DEVELOPMENT	GO_LABYRINTHINE_LAYER_DEVELOPMENT		40	0.502421	1.3927	0	0.248794	1	882	tags=13%, list=4%, signal=13%
GO_SALIVARY_GLAND_DEVELOPMENT	GO_SALIVARY_GLAND_DEVELOPMENT		34	0.462026	1.39237	0	0.249027	1	1195	tags=18%, list=6%, signal=19%
GO_REGULATION_OF_OXIDOREDUCTASE_ACTIVITY	GO_REGULATION_OF_OXIDOREDUCTASE_ACTIVITY		75	0.39841	1.39211	0.0979284	0.248817	1	2227	tags=17%, list=10%, signal=19%
GO_MUSCLE_CELL_PROLIFERATION	GO_MUSCLE_CELL_PROLIFERATION		159	0.362287	1.39199	0	0.2486	1	1399	tags=12%, list=7%, signal=13%
GO_MESENCHYMAL_CELL_DIFFERENTIATION	GO_MESENCHYMAL_CELL_DIFFERENTIATION		198	0.393228	1.39185	0	0.248457	1	3238	tags=23%, list=15%, signal=27%
GO_CONNECTIVE_TISSUE_DEVELOPMENT	GO_CONNECTIVE_TISSUE_DEVELOPMENT		227	0.478772	1.39165	0	0.248457	1	3339	tags=29%, list=16%, signal=34%
GO_REGULATION_OF_PROTEIN_MODIFICATION_BY_SMALL_PROTEIN_CONJUGATION_OR_REMOVAL	GO_REGULATION_OF_PROTEIN_MODIFICATION_BY_SMALL_PROTEIN_CONJUGATION_OR_REMOVAL		199	0.350805	1.39164	0	0.248092	1	6295	tags=34%, list=29%, signal=47%
GO_METANEPHROS_MORPHOGENESIS	GO_METANEPHROS_MORPHOGENESIS		30	0.584866	1.39135	0	0.248124	1	981	tags=20%, list=5%, signal=21%
GO_NEGATIVE_REGULATION_OF_EXTRINSIC_APOPTOTIC_SIGNALING_PATHWAY_VIA_DEATH_DOMAIN_RECEPTORS	GO_NEGATIVE_REGULATION_OF_EXTRINSIC_APOPTOTIC_SIGNALING_PATHWAY_VIA_DEATH_DOMAIN_RECEPTORS		30	0.544659	1.39121	0	0.24794	1	2696	tags=20%, list=13%, signal=23%
GO_NEPHRON_MORPHOGENESIS	GO_NEPHRON_MORPHOGENESIS		72	0.556769	1.39064	0	0.248659	1	1907	tags=22%, list=9%, signal=24%
GO_REGULATION_OF_HAIR_CYCLE	GO_REGULATION_OF_HAIR_CYCLE		21	0.501663	1.39018	0.0752896	0.248953	1	1018	tags=19%, list=5%, signal=20%
GO_NEGATIVE_REGULATION_OF_INTERLEUKIN_2_PRODUCTION	GO_NEGATIVE_REGULATION_OF_INTERLEUKIN_2_PRODUCTION		19	0.525387	1.38982	0.0883459	0.249449	1	1350	tags=16%, list=6%, signal=17%
GO_LEUKOCYTE_CELL_CELL_ADHESION	GO_LEUKOCYTE_CELL_CELL_ADHESION		229	0.377007	1.38977	0	0.249086	1	2355	tags=18%, list=11%, signal=20%
GO_ESTABLISHMENT_OF_EPITHELIAL_CELL_POLARITY	GO_ESTABLISHMENT_OF_EPITHELIAL_CELL_POLARITY		28	0.372226	1.38931	0	0.249047	1	708	tags=7%, list=3%, signal=7%
GO_RESPONSE_TO_FATTY_ACID	GO_RESPONSE_TO_FATTY_ACID		67	0.439844	1.38901	0	0.249147	1	1233	tags=18%, list=6%, signal=19%
GO_CARDIAC_SEPTUM_MORPHOGENESIS	GO_CARDIAC_SEPTUM_MORPHOGENESIS		72	0.513047	1.38829	0	0.249904	1	3926	tags=33%, list=18%, signal=41%
GO_ENDODERM_DEVELOPMENT	GO_ENDODERM_DEVELOPMENT		64	0.414246	1.38792	0	0.250283	1	1287	tags=13%, list=6%, signal=13%
GO_RESPONSE_TO_TRANSFORMING_GROWTH_FACTOR_BETA	GO_RESPONSE_TO_TRANSFORMING_GROWTH_FACTOR_BETA		211	0.314157	1.38755	0	0.250907	1	4142	tags=27%, list=19%, signal=33%
GO_CYCLIN_DEPENDENT_PROTEIN_KINASE_ACTIVITY	GO_CYCLIN_DEPENDENT_PROTEIN_KINASE_ACTIVITY		30	0.465361	1.38721	0	0.251098	1	318	tags=7%, list=1%, signal=7%
GO_SULFUR_COMPOUND_TRANSMEMBRANE_TRANSPORTER_ACTIVITY	GO_SULFUR_COMPOUND_TRANSMEMBRANE_TRANSPORTER_ACTIVITY		29	0.531323	1.38679	0	0.25178	1	1638	tags=17%, list=8%, signal=19%
GO_CHONDROCYTE_DIFFERENTIATION_INVOLVED_IN_ENDOCHONDRAL_BONE_MORPHOGENESIS	GO_CHONDROCYTE_DIFFERENTIATION_INVOLVED_IN_ENDOCHONDRAL_BONE_MORPHOGENESIS		24	0.5035	1.38579	0.0935114	0.25239	1	533	tags=8%, list=2%, signal=9%
GO_SITE_OF_POLARIZED_GROWTH	GO_SITE_OF_POLARIZED_GROWTH		156	0.306794	1.38547	0.0974155	0.25262	1	2367	tags=11%, list=11%, signal=12%
GO_PEPTIDYL_SERINE_MODIFICATION	GO_PEPTIDYL_SERINE_MODIFICATION		268	0.282441	1.38521	0	0.252909	1	1039	tags=6%, list=5%, signal=7%
GO_DEOXYRIBONUCLEOTIDE_BIOSYNTHETIC_PROCESS	GO_DEOXYRIBONUCLEOTIDE_BIOSYNTHETIC_PROCESS		15	0.473089	1.38486	0	0.252964	1	5477	tags=40%, list=26%, signal=54%
GO_INTERACTION_WITH_SYMBIONT	GO_INTERACTION_WITH_SYMBIONT		60	0.43588	1.38433	0	0.253749	1	608	tags=5%, list=3%, signal=5%
GO_COLUMNAR_CUBOIDAL_EPITHELIAL_CELL_DEVELOPMENT	GO_COLUMNAR_CUBOIDAL_EPITHELIAL_CELL_DEVELOPMENT		46	0.431553	1.38429	0.101504	0.253387	1	4079	tags=26%, list=19%, signal=32%
GO_OXIDOREDUCTASE_ACTIVITY_ACTING_ON_THE_CH_CH_GROUP_OF_DONORS	GO_OXIDOREDUCTASE_ACTIVITY_ACTING_ON_THE_CH_CH_GROUP_OF_DONORS		55	0.477096	1.38414	0	0.253201	1	966	tags=7%, list=5%, signal=8%
GO_CYTOPLASMIC_TRANSLATION	GO_CYTOPLASMIC_TRANSLATION		93	0.292585	1.38412	0	0.252842	1	277	tags=2%, list=1%, signal=2%
GO_BONE_DEVELOPMENT	GO_BONE_DEVELOPMENT		178	0.351081	1.38401	0	0.252484	1	3339	tags=21%, list=16%, signal=24%
GO_POSITIVE_REGULATION_OF_BLOOD_VESSEL_DIAMETER	GO_POSITIVE_REGULATION_OF_BLOOD_VESSEL_DIAMETER		44	0.503925	1.38394	0.0992366	0.252184	1	2044	tags=25%, list=10%, signal=28%
GO_CARDIAC_MYOFIBRIL_ASSEMBLY	GO_CARDIAC_MYOFIBRIL_ASSEMBLY		19	0.482821	1.38392	0	0.251828	1	1230	tags=21%, list=6%, signal=22%
GO_CHROMOSOME_TELOMERIC_REGION	GO_CHROMOSOME_TELOMERIC_REGION		147	0.334439	1.38334	0	0.252476	1	5945	tags=20%, list=28%, signal=28%
GO_CELLULAR_RESPONSE_TO_DEXAMETHASONE_STIMULUS	GO_CELLULAR_RESPONSE_TO_DEXAMETHASONE_STIMULUS		26	0.598803	1.38308	0.101695	0.252683	1	5367	tags=58%, list=25%, signal=77%
GO_PROTEIN_CATABOLIC_PROCESS_IN_THE_VACUOLE	GO_PROTEIN_CATABOLIC_PROCESS_IN_THE_VACUOLE		15	0.456774	1.38212	0.0848485	0.253337	1	371	tags=7%, list=2%, signal=7%
GO_EMBRYONIC_ORGAN_MORPHOGENESIS	GO_EMBRYONIC_ORGAN_MORPHOGENESIS		256	0.408356	1.38211	0	0.253039	1	1797	tags=16%, list=8%, signal=17%
GO_ERBB_SIGNALING_PATHWAY	GO_ERBB_SIGNALING_PATHWAY		123	0.375126	1.38205	0	0.252983	1	4815	tags=32%, list=23%, signal=41%
GO_BONE_MORPHOGENESIS	GO_BONE_MORPHOGENESIS		94	0.395181	1.38149	0	0.253573	1	3732	tags=28%, list=17%, signal=33%
GO_RECEPTOR_SIGNALING_PATHWAY_VIA_STAT	GO_RECEPTOR_SIGNALING_PATHWAY_VIA_STAT		95	0.508777	1.3814	0	0.253399	1	2786	tags=23%, list=13%, signal=27%
GO_POSITIVE_REGULATION_OF_CELL_CYCLE_ARREST	GO_POSITIVE_REGULATION_OF_CELL_CYCLE_ARREST		75	0.284845	1.381	0	0.253639	1	268	tags=3%, list=1%, signal=3%
GO_GLOMERULUS_DEVELOPMENT	GO_GLOMERULUS_DEVELOPMENT		52	0.502844	1.3807	0	0.253634	1	2786	tags=37%, list=13%, signal=42%
GO_APPENDAGE_MORPHOGENESIS	GO_APPENDAGE_MORPHOGENESIS		141	0.416602	1.38051	0	0.253589	1	3847	tags=31%, list=18%, signal=38%
GO_METANEPHRIC_EPITHELIUM_DEVELOPMENT	GO_METANEPHRIC_EPITHELIUM_DEVELOPMENT		21	0.611012	1.38042	0	0.253329	1	2333	tags=29%, list=11%, signal=32%
GO_SLEEP	GO_SLEEP		20	0.671684	1.37975	0	0.254592	1	2453	tags=40%, list=11%, signal=45%
GO_PROTEOGLYCAN_BINDING	GO_PROTEOGLYCAN_BINDING		27	0.586907	1.3793	0	0.255255	1	2410	tags=26%, list=11%, signal=29%
GO_REGULATION_OF_MACROPHAGE_DIFFERENTIATION	GO_REGULATION_OF_MACROPHAGE_DIFFERENTIATION		18	0.635994	1.37926	0	0.255217	1	4320	tags=50%, list=20%, signal=63%
GO_RESPONSE_TO_NITRIC_OXIDE	GO_RESPONSE_TO_NITRIC_OXIDE		16	0.52977	1.37883	0	0.255394	1	879	tags=19%, list=4%, signal=20%
GO_LAMELLIPODIUM_MEMBRANE	GO_LAMELLIPODIUM_MEMBRANE		22	0.576982	1.37816	0	0.256091	1	3510	tags=36%, list=16%, signal=43%
GO_MODULATION_BY_HOST_OF_VIRAL_PROCESS	GO_MODULATION_BY_HOST_OF_VIRAL_PROCESS		21	0.626059	1.37812	0.107143	0.255739	1	608	tags=10%, list=3%, signal=10%
GO_REGULATION_OF_NITRIC_OXIDE_SYNTHASE_ACTIVITY	GO_REGULATION_OF_NITRIC_OXIDE_SYNTHASE_ACTIVITY		36	0.534982	1.37795	0.0922787	0.255788	1	2227	tags=19%, list=10%, signal=22%
GO_REGULATION_OF_NON_CANONICAL_WNT_SIGNALING_PATHWAY	GO_REGULATION_OF_NON_CANONICAL_WNT_SIGNALING_PATHWAY		20	0.647974	1.3777	0	0.25576	1	1331	tags=20%, list=6%, signal=21%
GO_C21_STEROID_HORMONE_METABOLIC_PROCESS	GO_C21_STEROID_HORMONE_METABOLIC_PROCESS		28	0.613197	1.37759	0	0.255645	1	2051	tags=36%, list=10%, signal=39%
GO_DEMETHYLASE_ACTIVITY	GO_DEMETHYLASE_ACTIVITY		34	0.351116	1.37755	0.103448	0.255296	1	2458	tags=9%, list=12%, signal=10%
GO_DNA_METHYLATION_OR_DEMETHYLATION	GO_DNA_METHYLATION_OR_DEMETHYLATION		66	0.342882	1.37743	0.204409	0.255201	1	597	tags=5%, list=3%, signal=5%
GO_NEGATIVE_REGULATION_OF_RNA_CATABOLIC_PROCESS	GO_NEGATIVE_REGULATION_OF_RNA_CATABOLIC_PROCESS		45	0.336125	1.37725	0.0970297	0.255137	1	277	tags=4%, list=1%, signal=4%
GO_GROWTH_PLATE_CARTILAGE_CHONDROCYTE_DIFFERENTIATION	GO_GROWTH_PLATE_CARTILAGE_CHONDROCYTE_DIFFERENTIATION		19	0.5277	1.37724	0	0.25479	1	533	tags=11%, list=2%, signal=11%
GO_CELLULAR_COMPONENT_DISASSEMBLY	GO_CELLULAR_COMPONENT_DISASSEMBLY		485	0.269953	1.37702	0	0.255048	1	2114	tags=7%, list=10%, signal=7%
GO_RENAL_VESICLE_DEVELOPMENT	GO_RENAL_VESICLE_DEVELOPMENT		19	0.625842	1.37621	0	0.255785	1	1719	tags=26%, list=8%, signal=29%
GO_POSITIVE_REGULATION_OF_TRANSMEMBRANE_RECEPTOR_PROTEIN_SERINE_THREONINE_KINASE_SIGNALING_PATHWAY	GO_POSITIVE_REGULATION_OF_TRANSMEMBRANE_RECEPTOR_PROTEIN_SERINE_THREONINE_KINASE_SIGNALING_PATHWAY		88	0.34982	1.37608	0	0.25569	1	3341	tags=20%, list=16%, signal=24%
GO_G_PROTEIN_COUPLED_RECEPTOR_BINDING	GO_G_PROTEIN_COUPLED_RECEPTOR_BINDING		175	0.382508	1.3757	0	0.256022	1	1159	tags=14%, list=5%, signal=15%
GO_RESPONSE_TO_TUMOR_NECROSIS_FACTOR	GO_RESPONSE_TO_TUMOR_NECROSIS_FACTOR		224	0.354864	1.37568	0	0.255677	1	1296	tags=8%, list=6%, signal=8%
GO_CELLULAR_RESPONSE_TO_EXTERNAL_STIMULUS	GO_CELLULAR_RESPONSE_TO_EXTERNAL_STIMULUS		284	0.319368	1.37516	0	0.25575	1	1320	tags=8%, list=6%, signal=8%
GO_SARCOMERE_ORGANIZATION	GO_SARCOMERE_ORGANIZATION		35	0.461682	1.37492	0	0.255653	1	1550	tags=20%, list=7%, signal=22%
GO_POSITIVE_REGULATION_OF_ANIMAL_ORGAN_MORPHOGENESIS	GO_POSITIVE_REGULATION_OF_ANIMAL_ORGAN_MORPHOGENESIS		74	0.522121	1.37436	0	0.25609	1	1991	tags=23%, list=9%, signal=25%
GO_ARTERY_MORPHOGENESIS	GO_ARTERY_MORPHOGENESIS		56	0.416783	1.37429	0	0.255837	1	3204	tags=25%, list=15%, signal=29%
GO_POSITIVE_REGULATION_OF_DEPHOSPHORYLATION	GO_POSITIVE_REGULATION_OF_DEPHOSPHORYLATION		45	0.399191	1.37409	0	0.255826	1	2520	tags=13%, list=12%, signal=15%
GO_POSITIVE_REGULATION_OF_TYROSINE_PHOSPHORYLATION_OF_STAT_PROTEIN	GO_POSITIVE_REGULATION_OF_TYROSINE_PHOSPHORYLATION_OF_STAT_PROTEIN		39	0.555799	1.37408	0	0.255485	1	2700	tags=31%, list=13%, signal=35%
GO_NEGATIVE_REGULATION_OF_ANTIGEN_RECEPTOR_MEDIATED_SIGNALING_PATHWAY	GO_NEGATIVE_REGULATION_OF_ANTIGEN_RECEPTOR_MEDIATED_SIGNALING_PATHWAY		17	0.449389	1.3739	0.0921053	0.255378	1	5451	tags=47%, list=26%, signal=63%
GO_HEART_GROWTH	GO_HEART_GROWTH		77	0.398271	1.37369	0	0.255232	1	1440	tags=12%, list=7%, signal=12%
GO_GLYCOPROTEIN_COMPLEX	GO_GLYCOPROTEIN_COMPLEX		15	0.510254	1.37335	0	0.25527	1	592	tags=13%, list=3%, signal=14%
GO_RESPONSE_TO_ANGIOTENSIN	GO_RESPONSE_TO_ANGIOTENSIN		22	0.590846	1.37282	0	0.255874	1	1893	tags=27%, list=9%, signal=30%
GO_BONE_RESORPTION	GO_BONE_RESORPTION		45	0.502143	1.37268	0	0.255697	1	1112	tags=13%, list=5%, signal=14%
GO_COLLAGEN_TRIMER	GO_COLLAGEN_TRIMER		61	0.497603	1.37252	0	0.255618	1	1426	tags=26%, list=7%, signal=28%
GO_FIBRINOLYSIS	GO_FIBRINOLYSIS		15	0.633831	1.37185	0	0.256114	1	2210	tags=40%, list=10%, signal=45%
GO_SENSORY_ORGAN_DEVELOPMENT	GO_SENSORY_ORGAN_DEVELOPMENT		454	0.362457	1.37176	0	0.255859	1	1918	tags=15%, list=9%, signal=16%
GO_RENAL_SYSTEM_PROCESS_INVOLVED_IN_REGULATION_OF_SYSTEMIC_ARTERIAL_BLOOD_PRESSURE	GO_RENAL_SYSTEM_PROCESS_INVOLVED_IN_REGULATION_OF_SYSTEMIC_ARTERIAL_BLOOD_PRESSURE		16	0.739382	1.36956	0.133843	0.259554	1	867	tags=31%, list=4%, signal=33%
GO_RESPONSE_TO_GONADOTROPIN	GO_RESPONSE_TO_GONADOTROPIN		23	0.471941	1.36938	0.107143	0.25929	1	3111	tags=26%, list=15%, signal=31%
GO_EXOCRINE_SYSTEM_DEVELOPMENT	GO_EXOCRINE_SYSTEM_DEVELOPMENT		43	0.455659	1.36907	0	0.259507	1	1228	tags=16%, list=6%, signal=17%
GO_REGULATION_OF_ANIMAL_ORGAN_MORPHOGENESIS	GO_REGULATION_OF_ANIMAL_ORGAN_MORPHOGENESIS		227	0.418125	1.36856	0	0.259663	1	3260	tags=21%, list=15%, signal=25%
GO_ERK1_AND_ERK2_CASCADE	GO_ERK1_AND_ERK2_CASCADE		219	0.377615	1.3685	0	0.259574	1	1893	tags=16%, list=9%, signal=17%
GO_SECONDARY_METABOLIC_PROCESS	GO_SECONDARY_METABOLIC_PROCESS		46	0.491312	1.36848	0.106931	0.259287	1	966	tags=13%, list=5%, signal=14%
GO_TELOMERE_ORGANIZATION	GO_TELOMERE_ORGANIZATION		165	0.274792	1.36811	0.0994264	0.25953	1	4021	tags=9%, list=19%, signal=11%
GO_VENTRICULAR_CARDIAC_MUSCLE_TISSUE_DEVELOPMENT	GO_VENTRICULAR_CARDIAC_MUSCLE_TISSUE_DEVELOPMENT		46	0.395471	1.36769	0	0.259831	1	852	tags=9%, list=4%, signal=9%
GO_PHARYNGEAL_SYSTEM_DEVELOPMENT	GO_PHARYNGEAL_SYSTEM_DEVELOPMENT		24	0.522829	1.36753	0	0.259872	1	1172	tags=17%, list=5%, signal=18%
GO_DEVELOPMENTAL_INDUCTION	GO_DEVELOPMENTAL_INDUCTION		31	0.501298	1.36711	0	0.259602	1	1369	tags=23%, list=6%, signal=24%
GO_REGULATION_OF_CELL_SUBSTRATE_ADHESION	GO_REGULATION_OF_CELL_SUBSTRATE_ADHESION		173	0.505157	1.36708	0	0.259333	1	3263	tags=27%, list=15%, signal=32%
GO_NEGATIVE_REGULATION_OF_INTRACELLULAR_SIGNAL_TRANSDUCTION	GO_NEGATIVE_REGULATION_OF_INTRACELLULAR_SIGNAL_TRANSDUCTION		423	0.269988	1.36685	0	0.259185	1	3373	tags=13%, list=16%, signal=15%
GO_EPITHELIAL_TUBE_MORPHOGENESIS	GO_EPITHELIAL_TUBE_MORPHOGENESIS		288	0.35298	1.36666	0	0.259155	1	3377	tags=20%, list=16%, signal=24%
GO_POSITIVE_REGULATION_OF_DNA_BINDING_TRANSCRIPTION_FACTOR_ACTIVITY	GO_POSITIVE_REGULATION_OF_DNA_BINDING_TRANSCRIPTION_FACTOR_ACTIVITY		219	0.395551	1.36658	0	0.258901	1	2070	tags=13%, list=10%, signal=14%
GO_REGULATION_OF_TUBE_SIZE	GO_REGULATION_OF_TUBE_SIZE		102	0.455702	1.36626	0	0.258718	1	867	tags=20%, list=4%, signal=20%
GO_CARDIOCYTE_DIFFERENTIATION	GO_CARDIOCYTE_DIFFERENTIATION		123	0.371176	1.36617	0	0.258469	1	1893	tags=14%, list=9%, signal=15%
GO_POSITIVE_REGULATION_OF_RESPONSE_TO_DRUG	GO_POSITIVE_REGULATION_OF_RESPONSE_TO_DRUG		20	0.650767	1.36582	0	0.25897	1	1982	tags=30%, list=9%, signal=33%
GO_MYOFIBRIL_ASSEMBLY	GO_MYOFIBRIL_ASSEMBLY		50	0.441244	1.36577	0	0.258736	1	1550	tags=20%, list=7%, signal=22%
GO_RNA_STABILIZATION	GO_RNA_STABILIZATION		36	0.338919	1.36573	0.0955166	0.258404	1	277	tags=3%, list=1%, signal=3%
GO_PHOSPHATIDYLINOSITOL_3_KINASE_SIGNALING	GO_PHOSPHATIDYLINOSITOL_3_KINASE_SIGNALING		120	0.415974	1.36563	0	0.258074	1	2125	tags=19%, list=10%, signal=21%
GO_MONOVALENT_INORGANIC_ANION_HOMEOSTASIS	GO_MONOVALENT_INORGANIC_ANION_HOMEOSTASIS		17	0.654409	1.36557	0	0.257892	1	1084	tags=18%, list=5%, signal=19%
GO_AMINOGLYCAN_METABOLIC_PROCESS	GO_AMINOGLYCAN_METABOLIC_PROCESS		117	0.421772	1.36536	0	0.257898	1	2200	tags=22%, list=10%, signal=25%
GO_ERYTHROCYTE_HOMEOSTASIS	GO_ERYTHROCYTE_HOMEOSTASIS		102	0.405165	1.36473	0.0961183	0.258641	1	1438	tags=10%, list=7%, signal=10%
GO_CELLULAR_RESPONSE_TO_STEROID_HORMONE_STIMULUS	GO_CELLULAR_RESPONSE_TO_STEROID_HORMONE_STIMULUS		214	0.293762	1.36437	0	0.259296	1	3551	tags=16%, list=17%, signal=19%
GO_SUPEROXIDE_ANION_GENERATION	GO_SUPEROXIDE_ANION_GENERATION		19	0.528958	1.3633	0	0.259976	1	1893	tags=21%, list=9%, signal=23%
GO_POSITIVE_REGULATION_OF_MAPK_CASCADE	GO_POSITIVE_REGULATION_OF_MAPK_CASCADE		405	0.325534	1.36308	0	0.25997	1	1290	tags=10%, list=6%, signal=11%
GO_IRON_ION_TRANSPORT	GO_IRON_ION_TRANSPORT		62	0.485552	1.36296	0	0.259859	1	1543	tags=11%, list=7%, signal=12%
GO_CELLULAR_RESPONSE_TO_NITRIC_OXIDE	GO_CELLULAR_RESPONSE_TO_NITRIC_OXIDE		15	0.533244	1.36294	0	0.259603	1	879	tags=20%, list=4%, signal=21%
GO_REGULATION_OF_APOPTOTIC_SIGNALING_PATHWAY	GO_REGULATION_OF_APOPTOTIC_SIGNALING_PATHWAY		346	0.281175	1.36285	0	0.259446	1	4106	tags=19%, list=19%, signal=23%
GO_LABYRINTHINE_LAYER_MORPHOGENESIS	GO_LABYRINTHINE_LAYER_MORPHOGENESIS		16	0.603003	1.36261	0	0.25938	1	882	tags=25%, list=4%, signal=26%
GO_NEGATIVE_REGULATION_OF_CELLULAR_SENESCENCE	GO_NEGATIVE_REGULATION_OF_CELLULAR_SENESCENCE		19	0.590954	1.36242	0	0.259406	1	965	tags=11%, list=5%, signal=11%
GO_TRANSFORMING_GROWTH_FACTOR_BETA_BINDING	GO_TRANSFORMING_GROWTH_FACTOR_BETA_BINDING		21	0.411865	1.36138	0.090573	0.260346	1	3341	tags=38%, list=16%, signal=45%
GO_CELLULAR_GLUCOSE_HOMEOSTASIS	GO_CELLULAR_GLUCOSE_HOMEOSTASIS		125	0.337316	1.36133	0	0.260122	1	1572	tags=10%, list=7%, signal=10%
GO_NLS_BEARING_PROTEIN_IMPORT_INTO_NUCLEUS	GO_NLS_BEARING_PROTEIN_IMPORT_INTO_NUCLEUS		20	0.602768	1.36128	0.0945946	0.259796	1	5606	tags=50%, list=26%, signal=68%
GO_POSITIVE_REGULATION_OF_LEUKOCYTE_CHEMOTAXIS	GO_POSITIVE_REGULATION_OF_LEUKOCYTE_CHEMOTAXIS		53	0.407191	1.36112	0	0.259867	1	2000	tags=21%, list=9%, signal=23%
GO_MYELOID_CELL_HOMEOSTASIS	GO_MYELOID_CELL_HOMEOSTASIS		124	0.403021	1.36101	0.0994264	0.259786	1	4023	tags=24%, list=19%, signal=30%
GO_LUNG_MORPHOGENESIS	GO_LUNG_MORPHOGENESIS		46	0.519727	1.36095	0	0.259462	1	1195	tags=20%, list=6%, signal=21%
GO_REGULATION_OF_CELLULAR_RESPONSE_TO_TRANSFORMING_GROWTH_FACTOR_BETA_STIMULUS	GO_REGULATION_OF_CELLULAR_RESPONSE_TO_TRANSFORMING_GROWTH_FACTOR_BETA_STIMULUS		98	0.351807	1.36095	0	0.259139	1	4142	tags=30%, list=19%, signal=37%
GO_POSITIVE_REGULATION_OF_PROTEOLYSIS	GO_POSITIVE_REGULATION_OF_PROTEOLYSIS		295	0.250109	1.36067	0	0.2595	1	1094	tags=5%, list=5%, signal=6%
GO_SPECIFIC_GRANULE_MEMBRANE	GO_SPECIFIC_GRANULE_MEMBRANE		67	0.394733	1.36037	0	0.259525	1	1406	tags=10%, list=7%, signal=11%
[truncated: 1,919 more rows]

## Sheet: WiT49 1G11 WT1KO vs 1D9 WT1KO
NAME	GS<br> follow link to MSigDB	GS DETAILS	SIZE	ES	NES	NOM p-val	FDR q-val	FWER p-val	RANK AT MAX	LEADING EDGE
[truncated: 2,787 more rows]

[truncated: 2 more sheets: HEK293 parental vs 1E3 WT1KO, HEK293 parental vs 3H5 WT1KO]
